# Supplementary material for: Consequences of Evolving Limbless, Burrowing Forms for the Behavior and Population Density of Tropical Lizards
Source: Preprints.org preprint supplement (doi:10.20944/preprints202203.0179.v1), 2022-03-14
Supplement: Supplementary file 1 [file supplementary]

## Sheet: escape behavior
individual	option	treatment	species	morph
Proteal1	3	sand	P.tetradactylus	lacertoid
Proteal2	1	sand	P.tetradactylus	lacertoid
Proteal3	1	sand	P.tetradactylus	lacertoid
Proteal4	1	sand	P.tetradactylus	lacertoid
Proteal5	3	sand	P.tetradactylus	lacertoid
Proteal6	2	sand	P.tetradactylus	lacertoid
Proteal7	1	sand	P.tetradactylus	lacertoid
Proteal8	1	sand	P.tetradactylus	lacertoid
Proteal9	1	sand	P.tetradactylus	lacertoid
Proteal10	1	sand	P.tetradactylus	lacertoid
Proteal12	1	sand	P.tetradactylus	lacertoid
Proteal13	1	sand	P.tetradactylus	lacertoid
Proteal14	1	sand	P.tetradactylus	lacertoid
Proteal15	1	sand	P.tetradactylus	lacertoid
Proteal16	1	sand	P.tetradactylus	lacertoid
Proteal17	1	sand	P.tetradactylus	lacertoid
Proteal7+	1	sand	P.tetradactylus	lacertoid
Proteal18	1	sand	P.tetradactylus	lacertoid
Proteal19	1	sand	P.tetradactylus	lacertoid
Proteal20	1	sand	P.tetradactylus	lacertoid
Proteal21	1	sand	P.tetradactylus	lacertoid
Proteal22	1	sand	P.tetradactylus	lacertoid
Proteal23	1	sand	P.tetradactylus	lacertoid
Proteal24	1	sand	P.tetradactylus	lacertoid
Proteal25	1	sand	P.tetradactylus	lacertoid
Proteal1	2	leaf litter	P.tetradactylus	lacertoid
Proteal2	3	leaf litter	P.tetradactylus	lacertoid
Proteal3	1	leaf litter	P.tetradactylus	lacertoid
Proteal4	3	leaf litter	P.tetradactylus	lacertoid
Proteal5	1	leaf litter	P.tetradactylus	lacertoid
Proteal6	3	leaf litter	P.tetradactylus	lacertoid
Proteal7	3	leaf litter	P.tetradactylus	lacertoid
Proteal8	3	leaf litter	P.tetradactylus	lacertoid
Proteal9	2	leaf litter	P.tetradactylus	lacertoid
Proteal10	3	leaf litter	P.tetradactylus	lacertoid
Proteal12	2	leaf litter	P.tetradactylus	lacertoid
Proteal13	2	leaf litter	P.tetradactylus	lacertoid
Proteal14	2	leaf litter	P.tetradactylus	lacertoid
Proteal15	2	leaf litter	P.tetradactylus	lacertoid
Proteal16	3	leaf litter	P.tetradactylus	lacertoid
Proteal17	2	leaf litter	P.tetradactylus	lacertoid
Proteal7+	2	leaf litter	P.tetradactylus	lacertoid
Proteal18	2	leaf litter	P.tetradactylus	lacertoid
Proteal19	2	leaf litter	P.tetradactylus	lacertoid
Proteal20	1	leaf litter	P.tetradactylus	lacertoid
Proteal21	3	leaf litter	P.tetradactylus	lacertoid
Proteal22	1	leaf litter	P.tetradactylus	lacertoid
Proteal23	3	leaf litter	P.tetradactylus	lacertoid
Proteal24	3	leaf litter	P.tetradactylus	lacertoid
Proteal25	3	leaf litter	P.tetradactylus	lacertoid
Proery1	1	leaf litter	P.erythrocercus	lacertoid
Proery2	1	leaf litter	P.erythrocercus	lacertoid
Proery3	1	leaf litter	P.erythrocercus	lacertoid
Proery4	1	leaf litter	P.erythrocercus	lacertoid
Proery5	1	leaf litter	P.erythrocercus	lacertoid
Proery6	1	leaf litter	P.erythrocercus	lacertoid
Proery7	1	leaf litter	P.erythrocercus	lacertoid
Proery8	1	leaf litter	P.erythrocercus	lacertoid
Proery9	1	leaf litter	P.erythrocercus	lacertoid
Proery10	1	leaf litter	P.erythrocercus	lacertoid
Proery11	1	leaf litter	P.erythrocercus	lacertoid
Proery1	2	leaf litter	P.erythrocercus	lacertoid
Proery2	2	leaf litter	P.erythrocercus	lacertoid
Proery3	2	leaf litter	P.erythrocercus	lacertoid
Proery4	2	leaf litter	P.erythrocercus	lacertoid
Proery5	1	leaf litter	P.erythrocercus	lacertoid
Proery6	3	leaf litter	P.erythrocercus	lacertoid
Proery7	1	leaf litter	P.erythrocercus	lacertoid
Proery8	3	leaf litter	P.erythrocercus	lacertoid
Proery9	1	leaf litter	P.erythrocercus	lacertoid
Proery10	3	leaf litter	P.erythrocercus	lacertoid
Proery11	3	leaf litter	P.erythrocercus	lacertoid
Leioal1	3	leaf litter	C.leiolepis	snake-like
Leioal2	3	leaf litter	C.leiolepis	snake-like
Leioal3	3	leaf litter	C.leiolepis	snake-like
Leioal4	3	leaf litter	C.leiolepis	snake-like
Leioal5	3	leaf litter	C.leiolepis	snake-like
Leioal6	3	leaf litter	C.leiolepis	snake-like
Leioal7	3	leaf litter	C.leiolepis	snake-like
Leioal8	3	leaf litter	C.leiolepis	snake-like
Leioal9	3	leaf litter	C.leiolepis	snake-like
Leioal10	3	leaf litter	C.leiolepis	snake-like
Leioal11	3	leaf litter	C.leiolepis	snake-like
Leioal12	3	leaf litter	C.leiolepis	snake-like
Leioal13	3	leaf litter	C.leiolepis	snake-like
Leioal14	3	leaf litter	C.leiolepis	snake-like
Leioal15	3	leaf litter	C.leiolepis	snake-like
Leioal16	3	leaf litter	C.leiolepis	snake-like
Leioal17	3	leaf litter	C.leiolepis	snake-like
Leioal18	3	leaf litter	C.leiolepis	snake-like
Leioal19	3	leaf litter	C.leiolepis	snake-like
Leioal20	3	leaf litter	C.leiolepis	snake-like
Leioal21	3	leaf litter	C.leiolepis	snake-like
Leioal22	3	leaf litter	C.leiolepis	snake-like
Leioal23	3	leaf litter	C.leiolepis	snake-like
Leioal24	3	leaf litter	C.leiolepis	snake-like
Leioal1	3	leaf litter	C.leiolepis	snake-like
Leioal2	3	leaf litter	C.leiolepis	snake-like
Leioal3	3	leaf litter	C.leiolepis	snake-like
Leioal4	3	leaf litter	C.leiolepis	snake-like
Leioal5	3	leaf litter	C.leiolepis	snake-like
Leioal6	3	leaf litter	C.leiolepis	snake-like
Leioal7	3	leaf litter	C.leiolepis	snake-like
Leioal8	3	leaf litter	C.leiolepis	snake-like
Leioal9	3	leaf litter	C.leiolepis	snake-like
Leioal10	3	leaf litter	C.leiolepis	snake-like
Leioal11	3	leaf litter	C.leiolepis	snake-like
Leioal12	3	leaf litter	C.leiolepis	snake-like
Leioal13	3	leaf litter	C.leiolepis	snake-like
Leioal14	2	leaf litter	C.leiolepis	snake-like
Leioal15	3	leaf litter	C.leiolepis	snake-like
Leioal16	3	leaf litter	C.leiolepis	snake-like
Leioal17	2	leaf litter	C.leiolepis	snake-like
Leioal18	3	leaf litter	C.leiolepis	snake-like
Leioal19	3	leaf litter	C.leiolepis	snake-like
Leioal20	2	leaf litter	C.leiolepis	snake-like
Leioal21	3	leaf litter	C.leiolepis	snake-like
Leioal22	3	leaf litter	C.leiolepis	snake-like
Leioal23	3	leaf litter	C.leiolepis	snake-like
Leioal24	2	leaf litter	C.leiolepis	snake-like
Notoal1	3	leaf litter	N.ablephara	snake-like
Notoal2	1	leaf litter	N.ablephara	snake-like
Notoal3	3	leaf litter	N.ablephara	snake-like
Notoal4	3	leaf litter	N.ablephara	snake-like
Notoal5	3	leaf litter	N.ablephara	snake-like
Notoal6	1	leaf litter	N.ablephara	snake-like
Notoal7	1	leaf litter	N.ablephara	snake-like
Notoal8	3	leaf litter	N.ablephara	snake-like
Notoal9	3	leaf litter	N.ablephara	snake-like
Notoal10	3	leaf litter	N.ablephara	snake-like
Notoal11	3	leaf litter	N.ablephara	snake-like
Notopi1	3	leaf litter	N.ablephara	snake-like
Notopi2	3	leaf litter	N.ablephara	snake-like
Notopi3	3	leaf litter	N.ablephara	snake-like
Notopi4	3	leaf litter	N.ablephara	snake-like
Notopi5	3	leaf litter	N.ablephara	snake-like
notoal	3	leaf litter	N.ablephara	snake-like
notoal	3	leaf litter	N.ablephara	snake-like
notoal	3	leaf litter	N.ablephara	snake-like
notoal	3	leaf litter	N.ablephara	snake-like
notoal	3	leaf litter	N.ablephara	snake-like
notoal	3	leaf litter	N.ablephara	snake-like
Notoal1	3	leaf litter	N.ablephara	snake-like
Notoal2	3	leaf litter	N.ablephara	snake-like
Notoal3	2	leaf litter	N.ablephara	snake-like
Notoal4	3	leaf litter	N.ablephara	snake-like
Notoal5	3	leaf litter	N.ablephara	snake-like
Notoal6	2	leaf litter	N.ablephara	snake-like
Notoal7	3	leaf litter	N.ablephara	snake-like
Notoal8	3	leaf litter	N.ablephara	snake-like
Notoal9	3	leaf litter	N.ablephara	snake-like
Notoal10	3	leaf litter	N.ablephara	snake-like
Notoal11	3	leaf litter	N.ablephara	snake-like
Notopi1	3	leaf litter	N.ablephara	snake-like
Notopi2	3	leaf litter	N.ablephara	snake-like
Notopi3	3	leaf litter	N.ablephara	snake-like
Notopi4	3	leaf litter	N.ablephara	snake-like
Notopi5	3	leaf litter	N.ablephara	snake-like
notoal	3	leaf litter	N.ablephara	snake-like
notoal	3	leaf litter	N.ablephara	snake-like
notoal	3	leaf litter	N.ablephara	snake-like
notoal	3	leaf litter	N.ablephara	snake-like
notoal	2	leaf litter	N.ablephara	snake-like
notoal	3	leaf litter	N.ablephara	snake-like
1	2	leaf litter	M.maximiliani	lacertoid
2	1	leaf litter	M.maximiliani	lacertoid
3	2	leaf litter	M.maximiliani	lacertoid
4	2	leaf litter	M.maximiliani	lacertoid
5	1	leaf litter	M.maximiliani	lacertoid
6	1	leaf litter	M.maximiliani	lacertoid
7	1	leaf litter	M.maximiliani	lacertoid
8	1	leaf litter	M.maximiliani	lacertoid
9	2	leaf litter	M.maximiliani	lacertoid
10	1	leaf litter	M.maximiliani	lacertoid
11	1	leaf litter	M.maximiliani	lacertoid
12	2	leaf litter	M.maximiliani	lacertoid
13	2	leaf litter	M.maximiliani	lacertoid
1	2	leaf litter	S.catimbau	snake-like
2	3	leaf litter	S.catimbau	snake-like
3	3	leaf litter	S.catimbau	snake-like
4	2	leaf litter	S.catimbau	snake-like
5	3	leaf litter	S.catimbau	snake-like
6	3	leaf litter	S.catimbau	snake-like
7	2	leaf litter	S.catimbau	snake-like
8	3	leaf litter	S.catimbau	snake-like
9	3	leaf litter	S.catimbau	snake-like
10	2	leaf litter	S.catimbau	snake-like
11	3	leaf litter	S.catimbau	snake-like
12	2	leaf litter	S.catimbau	snake-like
13	2	leaf litter	S.catimbau	snake-like
14	2	leaf litter	S.catimbau	snake-like
15	2	leaf litter	S.catimbau	snake-like
16	3	leaf litter	S.catimbau	snake-like
17	3	leaf litter	S.catimbau	snake-like
1	2	leaf litter	V.rubricauda	lacertoid
2	3	leaf litter	V.rubricauda	lacertoid
3	2	leaf litter	V.rubricauda	lacertoid
4	2	leaf litter	V.rubricauda	lacertoid
5	2	leaf litter	V.rubricauda	lacertoid
6	1	leaf litter	V.rubricauda	lacertoid
7	2	leaf litter	V.rubricauda	lacertoid
8	2	leaf litter	V.rubricauda	lacertoid
9	2	leaf litter	V.rubricauda	lacertoid
10	2	leaf litter	V.rubricauda	lacertoid
11	1	leaf litter	V.rubricauda	lacertoid
12	2	leaf litter	V.rubricauda	lacertoid
13	2	leaf litter	V.rubricauda	lacertoid
14	1	leaf litter	V.rubricauda	lacertoid
1	1	sand	M.maximiliani	lacertoid
2	2	sand	M.maximiliani	lacertoid
3	1	sand	M.maximiliani	lacertoid
4	1	sand	M.maximiliani	lacertoid
5	1	sand	M.maximiliani	lacertoid
6	1	sand	M.maximiliani	lacertoid
7	1	sand	M.maximiliani	lacertoid
8	1	sand	M.maximiliani	lacertoid
9	1	sand	M.maximiliani	lacertoid
10	1	sand	M.maximiliani	lacertoid
11	1	sand	M.maximiliani	lacertoid
12	1	sand	M.maximiliani	lacertoid
13	1	sand	M.maximiliani	lacertoid
1	2	sand	S.catimbau	snake-like
2	3	sand	S.catimbau	snake-like
3	3	sand	S.catimbau	snake-like
4	2	sand	S.catimbau	snake-like
5	3	sand	S.catimbau	snake-like
6	3	sand	S.catimbau	snake-like
7	3	sand	S.catimbau	snake-like
8	3	sand	S.catimbau	snake-like
9	2	sand	S.catimbau	snake-like
10	1	sand	S.catimbau	snake-like
11	1	sand	S.catimbau	snake-like
12	1	sand	S.catimbau	snake-like
13	2	sand	S.catimbau	snake-like
14	3	sand	S.catimbau	snake-like
15	2	sand	S.catimbau	snake-like
16	2	sand	S.catimbau	snake-like
17	3	sand	S.catimbau	snake-like
1	2	sand	V.rubricauda	lacertoid
2	1	sand	V.rubricauda	lacertoid
3	1	sand	V.rubricauda	lacertoid
4	1	sand	V.rubricauda	lacertoid
5	1	sand	V.rubricauda	lacertoid
6	1	sand	V.rubricauda	lacertoid
7	1	sand	V.rubricauda	lacertoid
8	1	sand	V.rubricauda	lacertoid
9	1	sand	V.rubricauda	lacertoid
10	1	sand	V.rubricauda	lacertoid
11	1	sand	V.rubricauda	lacertoid
12	2	sand	V.rubricauda	lacertoid
13	1	sand	V.rubricauda	lacertoid
14	1	sand	V.rubricauda	lacertoid
Gampsi1	1	sand	P.paeminosus	lacertoid
Gampsi2	1	sand	P.paeminosus	lacertoid
Gampsi3	1	sand	P.paeminosus	lacertoid
Gampsi4	1	sand	P.paeminosus	lacertoid
Gampsi5	1	sand	P.paeminosus	lacertoid
Gampsi1	2	leaf litter	P.paeminosus	lacertoid
Gampsi2	1	leaf litter	P.paeminosus	lacertoid
Gampsi3	2	leaf litter	P.paeminosus	lacertoid
Gampsi4	2	leaf litter	P.paeminosus	lacertoid
Gampsi5	2	leaf litter	P.paeminosus	lacertoid
Gampsi6	1	sand	P.paeminosus	lacertoid
Gampsi7	1	sand	P.paeminosus	lacertoid
Gampsi8	1	sand	P.paeminosus	lacertoid
Gampsi9	1	sand	P.paeminosus	lacertoid
Gampsi10	1	sand	P.paeminosus	lacertoid
Gampsi11	1	sand	P.paeminosus	lacertoid
Gampsi6	1	leaf litter	P.paeminosus	lacertoid
Gampsi7	1	leaf litter	P.paeminosus	lacertoid
Gampsi8	2	leaf litter	P.paeminosus	lacertoid
Gampsi9	2	leaf litter	P.paeminosus	lacertoid
Gampsi10	2	leaf litter	P.paeminosus	lacertoid
Gampsi11	1	leaf litter	P.paeminosus	lacertoid
Gampsi12	1	leaf litter	P.paeminosus	lacertoid
Gampsi13	1	leaf litter	P.paeminosus	lacertoid
Gampsi14	1	leaf litter	P.paeminosus	lacertoid
Gampsi15	2	leaf litter	P.paeminosus	lacertoid
Gampsi16	1	leaf litter	P.paeminosus	lacertoid
Gampsi17	1	leaf litter	P.paeminosus	lacertoid
Gampsi18	2	leaf litter	P.paeminosus	lacertoid
Gampsi19	2	leaf litter	P.paeminosus	lacertoid
Gampsi20	2	leaf litter	P.paeminosus	lacertoid
Gampsi21	2	leaf litter	P.paeminosus	lacertoid
Gampsi22	2	leaf litter	P.paeminosus	lacertoid
Gampsi12	1	sand	P.paeminosus	lacertoid
Gampsi13	1	sand	P.paeminosus	lacertoid
Gampsi14	1	sand	P.paeminosus	lacertoid
Gampsi15	1	sand	P.paeminosus	lacertoid
Gampsi16	1	sand	P.paeminosus	lacertoid
Gampsi17	1	sand	P.paeminosus	lacertoid
Gampsi18	1	sand	P.paeminosus	lacertoid
Gampsi19	1	sand	P.paeminosus	lacertoid
Gampsi20	1	sand	P.paeminosus	lacertoid
Gampsi21	1	sand	P.paeminosus	lacertoid
Gampsi22	1	sand	P.paeminosus	lacertoid
Gampsi23	2	leaf litter	P.paeminosus	lacertoid
Gampsi24	2	leaf litter	P.paeminosus	lacertoid
Gampsi25	1	leaf litter	P.paeminosus	lacertoid
Gampsi23	1	sand	P.paeminosus	lacertoid
Gampsi24	1	sand	P.paeminosus	lacertoid
Gampsi25	1	sand	P.paeminosus	lacertoid
Psiloina1	2	leaf litter	P.paeminosus	lacertoid
Psiloina1	1	sand	P.paeminosus	lacertoid
Gamcaly1	1	sand	C.sinebrachiatus	snake-like
Gamcaly2	1	sand	C.sinebrachiatus	snake-like
Gamcaly3	1	sand	C.sinebrachiatus	snake-like
Gamcaly4	1	sand	C.sinebrachiatus	snake-like
Gamcaly5	2	sand	C.sinebrachiatus	snake-like
Gamcaly6	2	sand	C.sinebrachiatus	snake-like
Gamcaly1	3	leaf litter	C.sinebrachiatus	snake-like
Gamcaly2	3	leaf litter	C.sinebrachiatus	snake-like
Gamcaly3	3	leaf litter	C.sinebrachiatus	snake-like
Gamcaly4	3	leaf litter	C.sinebrachiatus	snake-like
Gamcaly5	2	leaf litter	C.sinebrachiatus	snake-like
Gamcaly6	3	leaf litter	C.sinebrachiatus	snake-like
britvanzo1	2	leaf litter	V.rubricauda	lacertoid
britvanzo2	2	leaf litter	V.rubricauda	lacertoid
britvanzo1	1	sand	V.rubricauda	lacertoid
britvanzo2	1	sand	V.rubricauda	lacertoid
sinebrit1	2	sand	C.sinebrachiatus	snake-like
sinebrit2	3	sand	C.sinebrachiatus	snake-like
sinebrit3	3	sand	C.sinebrachiatus	snake-like
sinebrit4	2	sand	C.sinebrachiatus	snake-like
sinebrit5	2	sand	C.sinebrachiatus	snake-like
sinebrit6	3	sand	C.sinebrachiatus	snake-like
sinebrit7	3	sand	C.sinebrachiatus	snake-like
sinebrit8	3	sand	C.sinebrachiatus	snake-like
sinebrit9	2	sand	C.sinebrachiatus	snake-like
sinebrit1	2	leaf litter	C.sinebrachiatus	snake-like
sinebrit2	3	leaf litter	C.sinebrachiatus	snake-like
sinebrit3	2	leaf litter	C.sinebrachiatus	snake-like
sinebrit4	3	leaf litter	C.sinebrachiatus	snake-like
sinebrit5	1	leaf litter	C.sinebrachiatus	snake-like
sinebrit6	2	leaf litter	C.sinebrachiatus	snake-like
sinebrit7	3	leaf litter	C.sinebrachiatus	snake-like
sinebrit8	2	leaf litter	C.sinebrachiatus	snake-like
sinebrit9	3	leaf litter	C.sinebrachiatus	snake-like
pvvanzo1	2	leaf litter	V.rubricauda	lacertoid
pvvanzo2	2	leaf litter	V.rubricauda	lacertoid
pvvanzo1	2	sand	V.rubricauda	lacertoid
pvvanzo2	1	sand	V.rubricauda	lacertoid
pvsinebrach1	3	sand	C.sinebrachiatus	snake-like
pvsinebrach2	2	sand	C.sinebrachiatus	snake-like
pvsinebrach3	3	sand	C.sinebrachiatus	snake-like
pvsinebrach1	3	leaf litter	C.sinebrachiatus	snake-like
pvsinebrach2	3	leaf litter	C.sinebrachiatus	snake-like
pvsinebrach3	2	leaf litter	C.sinebrachiatus	snake-like
sinebrit10	3	sand	C.sinebrachiatus	snake-like
sinebrit11	1	sand	C.sinebrachiatus	snake-like
sinebrit12	3	sand	C.sinebrachiatus	snake-like
sinebrit10	3	leaf litter	C.sinebrachiatus	snake-like
sinebrit11	2	leaf litter	C.sinebrachiatus	snake-like
sinebrit12	3	leaf litter	C.sinebrachiatus	snake-like
pvvanzo3	2	leaf litter	V.rubricauda	lacertoid
pvvanzo3	1	sand	V.rubricauda	lacertoid
pvsinebrach4	3	sand	C.sinebrachiatus	snake-like
pvsinebrach5	3	sand	C.sinebrachiatus	snake-like
pvsinebrach6	2	sand	C.sinebrachiatus	snake-like
pvsinebrach4	3	leaf litter	C.sinebrachiatus	snake-like
pvsinebrach5	3	leaf litter	C.sinebrachiatus	snake-like
pvsinebrach6	3	leaf litter	C.sinebrachiatus	snake-like
pvsinebrach7	3	sand	C.sinebrachiatus	snake-like
pvsinebrach8	3	sand	C.sinebrachiatus	snake-like
pvsinebrach9	3	sand	C.sinebrachiatus	snake-like
pvsinebrach10	2	sand	C.sinebrachiatus	snake-like
pvsinebrach7	3	leaf litter	C.sinebrachiatus	snake-like
pvsinebrach8	3	leaf litter	C.sinebrachiatus	snake-like
pvsinebrach9	3	leaf litter	C.sinebrachiatus	snake-like
pvsinebrach10	1	leaf litter	C.sinebrachiatus	snake-like
Vacacalypto1	3	sand	C.nicterus	snake-like
Vacacalypto2	3	sand	C.nicterus	snake-like
Vacacalypto3	3	sand	C.nicterus	snake-like
Vacacalypto4	2	sand	C.nicterus	snake-like
Vacacalypto5	3	sand	C.nicterus	snake-like
Vacacalypto6	3	sand	C.nicterus	snake-like
Vacacalypto7	2	sand	C.nicterus	snake-like
Vacacalypto8	2	sand	C.nicterus	snake-like
Vacacalypto9	2	sand	C.nicterus	snake-like
Vacacalypto10	3	sand	C.nicterus	snake-like
Vacacalypto11	3	sand	C.nicterus	snake-like
Vacacalypto12	2	sand	C.nicterus	snake-like
Vacacalypto13	2	sand	C.nicterus	snake-like
Vacacalypto14	2	sand	C.nicterus	snake-like
Vacacalypto15	2	sand	C.nicterus	snake-like
Vacacalypto16	3	sand	C.nicterus	snake-like
Vacacalypto17	2	sand	C.nicterus	snake-like
Vacacalypto18	2	sand	C.nicterus	snake-like
Vacacalypto19	2	sand	C.nicterus	snake-like
Vacacalypto20	2	sand	C.nicterus	snake-like
Vacacalypto1	3	leaf litter	C.nicterus	snake-like
Vacacalypto2	2	leaf litter	C.nicterus	snake-like
Vacacalypto3	3	leaf litter	C.nicterus	snake-like
Vacacalypto4	2	leaf litter	C.nicterus	snake-like
Vacacalypto5	2	leaf litter	C.nicterus	snake-like
Vacacalypto6	3	leaf litter	C.nicterus	snake-like
Vacacalypto7	2	leaf litter	C.nicterus	snake-like
Vacacalypto8	2	leaf litter	C.nicterus	snake-like
Vacacalypto9	2	leaf litter	C.nicterus	snake-like
Vacacalypto10	3	leaf litter	C.nicterus	snake-like
Vacacalypto11	2	leaf litter	C.nicterus	snake-like
Vacacalypto12	2	leaf litter	C.nicterus	snake-like
Vacacalypto13	2	leaf litter	C.nicterus	snake-like
Vacacalypto14	2	leaf litter	C.nicterus	snake-like
Vacacalypto15	2	leaf litter	C.nicterus	snake-like
Vacacalypto16	2	leaf litter	C.nicterus	snake-like
Vacacalypto17	3	leaf litter	C.nicterus	snake-like
Vacacalypto18	2	leaf litter	C.nicterus	snake-like
Vacacalypto19	2	leaf litter	C.nicterus	snake-like
Vacacalypto20	2	leaf litter	C.nicterus	snake-like
Vacacalypto21	3	sand	C.nicterus	snake-like
Vacacalypto22	3	sand	C.nicterus	snake-like
Vacacalypto23	2	sand	C.nicterus	snake-like
Vacacalypto24	3	sand	C.nicterus	snake-like
Vacacalypto21	2	leaf litter	C.nicterus	snake-like
Vacacalypto22	3	leaf litter	C.nicterus	snake-like
Vacacalypto23	2	leaf litter	C.nicterus	snake-like
Vacacalypto24	2	leaf litter	C.nicterus	snake-like
Vacavanzo1	1	sand	V.rubricauda	lacertoid
Vacavanzo2	1	sand	V.rubricauda	lacertoid
Vacavanzo3	1	sand	V.rubricauda	lacertoid
Vacavanzo4	1	sand	V.rubricauda	lacertoid
Vacavanzo5	1	sand	V.rubricauda	lacertoid
Vacavanzo6	1	sand	V.rubricauda	lacertoid
Vacavanzo7	2	sand	V.rubricauda	lacertoid
Vacavanzo8	1	sand	V.rubricauda	lacertoid
Vacavanzo9	1	sand	V.rubricauda	lacertoid
Vacavanzo10	1	sand	V.rubricauda	lacertoid
Vacavanzo11	1	sand	V.rubricauda	lacertoid
Vacavanzo12	1	sand	V.rubricauda	lacertoid
Vacavanzo13	1	sand	V.rubricauda	lacertoid
Vacavanzo14	1	sand	V.rubricauda	lacertoid
Vacavanzo15	1	sand	V.rubricauda	lacertoid
Vacavanzo16	1	sand	V.rubricauda	lacertoid
Vacavanzo17	1	sand	V.rubricauda	lacertoid
Vacavanzo18	1	sand	V.rubricauda	lacertoid
Vacavanzo19	1	sand	V.rubricauda	lacertoid
Vacavanzo20	1	sand	V.rubricauda	lacertoid
Vacavanzo21	1	sand	V.rubricauda	lacertoid
Vacavanzo1	2	leaf litter	V.rubricauda	lacertoid
Vacavanzo2	1	leaf litter	V.rubricauda	lacertoid
Vacavanzo3	2	leaf litter	V.rubricauda	lacertoid
Vacavanzo4	2	leaf litter	V.rubricauda	lacertoid
Vacavanzo5	1	leaf litter	V.rubricauda	lacertoid
Vacavanzo6	1	leaf litter	V.rubricauda	lacertoid
Vacavanzo7	2	leaf litter	V.rubricauda	lacertoid
Vacavanzo8	2	leaf litter	V.rubricauda	lacertoid
Vacavanzo9	2	leaf litter	V.rubricauda	lacertoid
Vacavanzo10	2	leaf litter	V.rubricauda	lacertoid
Vacavanzo11	1	leaf litter	V.rubricauda	lacertoid
Vacavanzo12	3	leaf litter	V.rubricauda	lacertoid
Vacavanzo13	2	leaf litter	V.rubricauda	lacertoid
Vacavanzo14	2	leaf litter	V.rubricauda	lacertoid
Vacavanzo15	2	leaf litter	V.rubricauda	lacertoid
Vacavanzo16	1	leaf litter	V.rubricauda	lacertoid
Vacavanzo17	2	leaf litter	V.rubricauda	lacertoid
Vacavanzo18	2	leaf litter	V.rubricauda	lacertoid
Vacavanzo19	1	leaf litter	V.rubricauda	lacertoid
Vacavanzo20	2	leaf litter	V.rubricauda	lacertoid
Vacavanzo21	2	leaf litter	V.rubricauda	lacertoid
Leioal1	3	sand	C.leiolepis	snake-like
Leioal2	3	sand	C.leiolepis	snake-like
Leioal3	3	sand	C.leiolepis	snake-like
Leioal4	3	sand	C.leiolepis	snake-like
Leioal5	3	sand	C.leiolepis	snake-like
Leioal6	3	sand	C.leiolepis	snake-like
Leioal7	3	sand	C.leiolepis	snake-like
Leioal8	3	sand	C.leiolepis	snake-like
Leioal9	3	sand	C.leiolepis	snake-like
Leioal10	3	sand	C.leiolepis	snake-like
Leioal11	3	sand	C.leiolepis	snake-like
Leioal12	3	sand	C.leiolepis	snake-like
Leioal13	3	sand	C.leiolepis	snake-like
Leioal14	3	sand	C.leiolepis	snake-like
Leioal15	3	sand	C.leiolepis	snake-like
Leioal16	3	sand	C.leiolepis	snake-like
Leioal17	3	sand	C.leiolepis	snake-like
Leioal18	3	sand	C.leiolepis	snake-like
Leioal19	3	sand	C.leiolepis	snake-like
Leioal20	3	sand	C.leiolepis	snake-like
Leioal21	3	sand	C.leiolepis	snake-like
Leioal22	3	sand	C.leiolepis	snake-like
Leioal23	3	sand	C.leiolepis	snake-like
Leioal24	3	sand	C.leiolepis	snake-like
Notoal1	3	sand	N.ablephara	snake-like
Notoal2	1	sand	N.ablephara	snake-like
Notoal3	3	sand	N.ablephara	snake-like
Notoal4	3	sand	N.ablephara	snake-like
Notoal5	3	sand	N.ablephara	snake-like
Notoal6	1	sand	N.ablephara	snake-like
Notoal7	1	sand	N.ablephara	snake-like
Notoal8	3	sand	N.ablephara	snake-like
Notoal9	3	sand	N.ablephara	snake-like
Notoal10	3	sand	N.ablephara	snake-like
Notoal11	3	sand	N.ablephara	snake-like
Notopi1	3	sand	N.ablephara	snake-like
Notopi2	3	sand	N.ablephara	snake-like
Notopi3	3	sand	N.ablephara	snake-like
Notopi4	3	sand	N.ablephara	snake-like
Notopi5	3	sand	N.ablephara	snake-like
notoal	3	sand	N.ablephara	snake-like
notoal	3	sand	N.ablephara	snake-like
notoal	3	sand	N.ablephara	snake-like
notoal	3	sand	N.ablephara	snake-like
notoal	3	sand	N.ablephara	snake-like
notoal	3	sand	N.ablephara	snake-like
Proery1	1	sand	P.erythrocercus	lacertoid
Proery2	1	sand	P.erythrocercus	lacertoid
Proery3	1	sand	P.erythrocercus	lacertoid
Proery4	1	sand	P.erythrocercus	lacertoid
Proery5	1	sand	P.erythrocercus	lacertoid
Proery6	1	sand	P.erythrocercus	lacertoid
Proery7	1	sand	P.erythrocercus	lacertoid
Proery8	1	sand	P.erythrocercus	lacertoid
Proery9	1	sand	P.erythrocercus	lacertoid
Proery10	1	sand	P.erythrocercus	lacertoid
Proery11	1	sand	P.erythrocercus	lacertoid

## Sheet: speeds
individual	treatment	temperature	turn	fframe	lframe	distance_px	scale.px_1cm.	frame.per.sec	lapse	morph	species	day	obs	locality	speed	des.rel
calyptomg3	areia	27	2	0	276	179.7	16.04	0.004	1.104	snake-like	C_sinebrachiatus	1		gameleira	10.1479	0.180493
calyptovaca8	duro	32	1	93	232	90.7	16.04	0.004	0.556	snake-like	C_nicterus	9		vacaria	10.1702	0.347522
scriptot19mancha	areia	22	2	3	207	125.8	15.06	0.004	0.816	snake-like	S_catimbau	8		catimbau	10.2368	0.250398
leioal7	duro	22	1	11	170	98.5	15	0.004	0.636	snake-like	C_leiolepis	6		alagoado	10.3249	0.319328
calyptopv6	duro	22	1	7	182	116.5	16.04	0.004	0.7	snake-like	C_sinebrachiatus	10		pedra vermelha	10.3758	0.201732
vanzodana2fil	areia	22	2	15	148	90.8	16.04	0.004	0.532	lacertoid	V_rubricauda	4		vacaria	10.6407	0.120282
notoal3	duro	22	2	20	205	121.4	15	0.004	0.74	snake-like	N_ablephara	6		alagoado	10.9369	0.194237
proteal22	areia	22	1	29	168	91.48	15	0.004	0.556	lacertoid	P_tetradactylus	6		alagoado	10.9688	0.184738
micrat20reg	areia	42	1	31	64	198.9	15.06	0.004	0.132	lacertoid	M_maximiliani	10		catimbau	100.054	1
gampsi17	areia	27	1	14	42	180	16.04	0.004	0.112	lacertoid	P_paeminosus	1		gameleira	100.196	0.612245
vanzovacamedio	duro	37	1	42	75	212.5	16.04	0.004	0.132	lacertoid	V_rubricauda	3		vacaria	100.365	0.967724
vanzobrit1	areia	32	2	14	49	226.3	16.04	0.004	0.14	lacertoid	V_rubricauda	2		pedra vermelha	100.775	1
proery4	areia	32	1	1	39	230.4	15	0.004	0.152	lacertoid	P_erythrocercus	1		alagoado	101.053	0.762853
micragrandeotilia	duro	32	2	4	46	255.7	15.06	0.004	0.168	lacertoid	M_maximiliani	7		catimbau	101.064	0.975296
vanzopv1	areia	37	1	13	40	178.2	16.04	0.004	0.108	lacertoid	V_rubricauda	7		pedra vermelha	102.868	0.766017
proery3	duro	32	2	5	41	222.2	15	0.004	0.144	lacertoid	P_erythrocercus	1		alagoado	102.87	0.869687
proery9	duro	37	1	13	54	254	15.028	0.004	0.164	lacertoid	P_erythrocercus	5		alagoado	103.06	1
protealp2	duro	37	3	6	36	186.2	15	0.004	0.12	lacertoid	P_tetradactylus	9		alagoado	103.444	1
micragrandeotilia	duro	27	1	4	56	324.6	15.06	0.004	0.208	lacertoid	M_maximiliani	6		catimbau	103.624	1
vanzovacamedio	duro	42	2	16	40	159.7	16.04	0.004	0.096	lacertoid	V_rubricauda	5		vacaria	103.712	1
vanzosemilist	duro	37	1	17	48	193.8	15.06	0.004	0.124	lacertoid	V_rubricauda	2		catimbau	103.778	1
proery5	areia	32	2	4	37	207.5	15	0.004	0.132	lacertoid	P_erythrocercus	5		alagoado	104.798	0.781531
micrat7grande	areia	37	1	6	43	234.1	15.06	0.004	0.148	lacertoid	M_maximiliani	2		catimbau	105.03	1
proery5	areia	37	1	4	34	190.2	15	0.004	0.12	lacertoid	P_erythrocercus	1		alagoado	105.667	0.78801
proery8	duro	42	2	155	177	139.8	15.028	0.004	0.088	lacertoid	P_erythrocercus	8		alagoado	105.712	1
vanzoextra	duro	42	1	17	46	184.9	15.06	0.004	0.116	lacertoid	V_rubricauda	3		catimbau	105.841	0.896067
vanzovacavul1	duro	42	2	39	63	163.3	16.04	0.004	0.096	lacertoid	V_rubricauda	5		vacaria	106.05	0.976125
micrat20rcomp	duro	32	2	15	51	230.8	15.06	0.004	0.144	lacertoid	M_maximiliani	7		catimbau	106.426	0.886329
vanzolist	duro	32	1	41	76	224.4	15.06	0.004	0.14	lacertoid	V_rubricauda	7		catimbau	106.431	0.860794
calyptovaca4	areia	32	1	8	29	144.4	16.04	0.004	0.084	snake-like	C_nicterus	2		catimbau	107.173	1
proteal11	duro	42	2	39	70	200.1	15	0.004	0.124	lacertoid	P_tetradactylus	3		alagoado	107.581	1
proery1	duro	42	1	47	71	155.7	15.028	0.004	0.096	lacertoid	P_erythrocercus	8		alagoado	107.924	0.805248
proery1	areia	42	2	33	60	175.6	15.028	0.004	0.108	lacertoid	P_erythrocercus	8		alagoado	108.193	1
vanzovacavul1	duro	37	1	26	60	237	16.04	0.004	0.136	lacertoid	V_rubricauda	3		vacaria	108.644	1
micrat20pontareg	duro	32	2	16	55	255.4	15.06	0.004	0.156	lacertoid	M_maximiliani	7		catimbau	108.71	1
vanzopv1	duro	32	1	2	34	223.7	16.04	0.004	0.128	lacertoid	V_rubricauda	9		vacaria	108.956	0.736825
leioal20	duro	22	2	84	291	138.2	15	0.004	0.828	snake-like	C_leiolepis	6		alagoado	11.1272	0.352332
vanzodana2semi	duro	37	1	28	59	219.5	16.04	0.004	0.124	lacertoid	V_rubricauda	3		vacaria	110.359	1
proery4	duro	37	2	80	105	166.3	15	0.004	0.1	lacertoid	P_erythrocercus	3		alagoado	110.867	0.999089
proery4	duro	32	2	9	40	206.4	15	0.004	0.124	lacertoid	P_erythrocercus	1		alagoado	110.968	1
gampsi13	duro	42	1	1	27	185.8	16.04	0.004	0.104	lacertoid	P_paeminosus	5		gameleira	111.38	1
proery7	areia	42	2	0	21	140.4	15	0.004	0.084	lacertoid	P_erythrocercus	2		alagoado	111.429	1
vanzolist	duro	42	2	5	31	174.7	15.06	0.004	0.104	lacertoid	V_rubricauda	3		catimbau	111.541	0.902119
vanzopv1	duro	37	2	20	49	207.8	16.04	0.004	0.116	lacertoid	V_rubricauda	7		pedra vermelha	111.682	0.755259
micragrandeotilia	areia	37	1	4	49	310.7	15.06	0.004	0.18	lacertoid	M_maximiliani	2		catimbau	114.616	0.863886
vanzolist	areia	42	1	2	31	202.1	15.06	0.004	0.116	lacertoid	V_rubricauda	3		catimbau	115.687	0.853879
vanzonegro	duro	32	2	7	44	258.1	15.06	0.004	0.148	lacertoid	V_rubricauda	7		catimbau	115.798	1
calyptovaca3	areia	32	1	10	36	193.7	16.04	0.004	0.104	snake-like	C_nicterus	2		vacaria	116.116	1
micrat20rcomp	duro	42	1	33	65	224.6	15.06	0.004	0.128	lacertoid	M_maximiliani	10		catimbau	116.513	0.970334
micrat11greg	duro	32	1	5	41	252.9	15.06	0.004	0.144	lacertoid	M_maximiliani	7	falta	catimbau	116.617	0.960207
proteal18prima	duro	32	2	3	34	217.4	15	0.004	0.124	lacertoid	P_tetradactylus	4		alagoado	116.882	1
proery3	duro	42	1	80	111	218.2	15	0.004	0.124	lacertoid	P_erythrocercus	6		alagoado	117.312	0.991778
vanzobrit1	duro	32	2	23	56	249.6	16.04	0.004	0.132	lacertoid	V_rubricauda	2		pedra vermelha	117.887	1
vanzoextra	duro	37	2	10	36	185	15.06	0.004	0.104	lacertoid	V_rubricauda	2		catimbau	118.117	1
proery3	duro	37	2	38	72	241.3	15	0.004	0.136	lacertoid	P_erythrocercus	3		alagoado	118.284	1
micrat20reg	duro	37	1	2	27	179	15.06	0.004	0.1	lacertoid	M_maximiliani	9		catimbau	118.858	1
calyptovaca4	duro	42	1	16	154	108.4	16.04	0.004	0.552	snake-like	C_nicterus	5		vacaria	12.2429	0.209199
calyptopv6	areia	22	1	28	256	181.5	16.04	0.004	0.912	snake-like	C_sinebrachiatus	10		pedra vermelha	12.4073	0.340818
calyptovaca3	duro	42	1	49	170	96.74	16.04	0.004	0.484	snake-like	C_nicterus	5		vacaria	12.4611	0.32233
calyptovaca2	duro	37	2	20	269	207.6	16.04	0.004	0.996	snake-like	C_nicterus	3		vacaria	12.9946	0.19985
micrat20rcomp	duro	37	1	20	53	238.7	15.06	0.004	0.132	lacertoid	M_maximiliani	9		catimbau	120.075	1
micrat7peq	duro	37	1	5	40	253.5	15.06	0.004	0.14	lacertoid	M_maximiliani	2		catimbau	120.233	1
proteal1	duro	42	1	15	42	195	15	0.004	0.108	lacertoid	P_tetradactylus	3		alagoado	120.37	1
vanzodana415	duro	37	2	3	31	216.8	16.04	0.004	0.112	lacertoid	V_rubricauda	7		vacaria	120.68	0.9948
vanzodana415	duro	42	1	32	56	186.8	16.04	0.004	0.096	lacertoid	V_rubricauda	5		vacaria	121.311	1
micrat11greg	duro	42	1	12	43	226.8	15.06	0.004	0.124	lacertoid	M_maximiliani	3		catimbau	121.45	1
vanzodana2list	duro	37	1	0	26	204.3	16.04	0.004	0.104	lacertoid	V_rubricauda	7		vacaria	122.47	0.822795
vanzolist	duro	37	1	8	37	216	15.06	0.004	0.116	lacertoid	V_rubricauda	2		catimbau	123.643	1
vanzodana2list	areia	42	2	23	50	216.1	16.04	0.004	0.108	lacertoid	V_rubricauda	5		vacaria	124.746	1
vanzot17semilist	duro	32	1	11	44	250.5	15.06	0.004	0.132	lacertoid	V_rubricauda	7		catimbau	126.011	1
proteal18prima	areia	42	1	1	26	189.3	15	0.004	0.1	lacertoid	P_tetradactylus	8		alagoado	126.2	1
vanzopv1	duro	37	1	5	32	223.7	16.04	0.004	0.108	lacertoid	V_rubricauda	7		pedra vermelha	129.133	1
calyptovaca10	areia	22	1	12	183	144	16.04	0.004	0.684	snake-like	C_nicterus	10		vacaria	13.1251	0.413867
scriptot19	duro	22	2	13	141	101.3	15.06	0.004	0.512	snake-like	S_catimbau	8		catimbau	13.1376	0.540004
vanzodana410	duro	37	2	34	170	116.1	16.04	0.004	0.544	lacertoid	V_rubricauda	7		vacaria	13.3054	0.229628
notopi2	areia	32	2	60	242	148.6	15	0.004	0.728	snake-like	N_ablephara	1		alagoado	13.6081	0.291073
calyptobrit1	duro	42	1	3	65	54.31	16.04	0.004	0.248	snake-like	C_sinebrachiatus	5		pedra vermelha	13.6529	0.492948
leioal10	duro	42	1	34	217	151.4	15	0.004	0.732	snake-like	C_leiolepis	8		alagoado	13.7887	0.347777
leioal9	duro	22	3	0	132	109.8	15	0.004	0.528	snake-like	C_leiolepis	6		alagoado	13.8636	0.45299
gampsi14	duro	32	2	16	35	159.5	16.04	0.004	0.076	lacertoid	P_paeminosus	2		gameleira	130.841	1
proery4	areia	42	1	9	34	198.7	15	0.004	0.1	lacertoid	P_erythrocercus	6		alagoado	132.467	1
micragrandeotilia	areia	32	2	4	43	311.7	15.06	0.004	0.156	lacertoid	M_maximiliani	7		catimbau	132.674	1
proery1	duro	37	1	16	39	185.3	15.028	0.004	0.092	lacertoid	P_erythrocercus	5		alagoado	134.025	1
proery5	areia	42	1	35	68	266	15.028	0.004	0.132	lacertoid	P_erythrocercus	8		alagoado	134.093	1
vanzopv1	areia	42	2	2	27	215.4	16.04	0.004	0.1	lacertoid	V_rubricauda	5		pedra vermelha	134.289	1
vanzolist	areia	37	2	12	38	212.2	15.06	0.004	0.104	lacertoid	V_rubricauda	2		catimbau	135.484	1
proery5	duro	42	1	2	28	214.5	15.028	0.004	0.104	lacertoid	P_erythrocercus	8		alagoado	137.244	1
gampsi17	duro	32	2	17	38	187	16.04	0.004	0.084	lacertoid	P_paeminosus	2		gameleira	138.79	1
notoal10	duro	22	1	3	130	109.3	15	0.004	0.508	snake-like	N_ablephara	6		alagoado	14.3438	0.284608
scriptot19mancha	duro	22	2	5	161	137.5	15.06	0.004	0.624	snake-like	S_catimbau	8		catimbau	14.6316	0.402502
proteal25	duro	42	1	1	21	172.2	15	0.004	0.08	lacertoid	P_tetradactylus	3		alagoado	143.5	1
scriptot13	areia	22	2	44	193	1325	15.06	0.004	0.596	snake-like	S_catimbau	8		catimbau	147.62	1
vanzopv1	duro	42	1	3	27	227.7	16.04	0.004	0.096	lacertoid	V_rubricauda	5		pedra vermelha	147.873	1
vanzodana2list	duro	42	2	5	27	210.1	16.04	0.004	0.088	lacertoid	V_rubricauda	5		vacaria	148.847	1
psiloina	areia	32	2	3	19	153.7	16.04	0.004	0.064	lacertoid	P_paeminosus	2		pedra vermelha	149.723	1
scriptot18	duro	22	2	9	190	163.9	15.06	0.004	0.724	snake-like	S_catimbau	8		catimbau	15.032	0.359104
calyptobrit1	duro	22	1	5	70	62.8	16.04	0.004	0.26	snake-like	C_sinebrachiatus	4		pedra vermelha	15.0585	0.543699
calyptomg1	duro	42	1	15	179	160.1	16.04	0.004	0.656	snake-like	C_sinebrachiatus	5		gameleira	15.2154	0.453576
calyptopv3	duro	42	1	0	58	57.29	16.04	0.004	0.232	snake-like	C_sinebrachiatus	5		pedra vermelha	15.3952	0.790622
notoal3	areia	22	2	12	164	142.4	15	0.004	0.608	snake-like	N_ablephara	6		alagoado	15.614	0.24916
notopi5	duro	32	1	17	213	183.9	15	0.004	0.784	snake-like	N_ablephara	1		alagoado	15.6378	0.579919
notoal6prima	areia	22	1	0	116	109.3	15	0.004	0.464	snake-like	N_ablephara	6		alagoado	15.704	0.306289
leioal7	areia	27	3	5	147	134.4	15	0.004	0.568	snake-like	C_leiolepis	2		alagoado	15.7746	0.460726
scriptot19	areia	22	2	12	125	107.7	15.06	0.004	0.452	snake-like	S_catimbau	8		catimbau	15.8217	0.454996
calyptopv4	duro	37	1	5	189	188.6	16.04	0.004	0.736	snake-like	C_sinebrachiatus	7		pedra vermelha	15.9757	0.553389
gampsi14	areia	32	1	8	25	170.5	16.04	0.004	0.068	lacertoid	P_paeminosus	2		gameleira	156.319	1
notoal14	areia	22	1	7	194	180.7	15	0.004	0.748	snake-like	N_ablephara	6		alagoado	16.1052	0.28756
scriptopeq	duro	22	1	10	126	113.3	15.06	0.004	0.464	snake-like	S_catimbau	1		catimbau	16.2139	0.501939
notoal6prima	duro	22	1	7	102	92.6	15	0.004	0.38	snake-like	N_ablephara	6		alagoado	16.2456	0.350993
leioal13	duro	27	3	5	146	137.9	15	0.004	0.564	snake-like	C_leiolepis	8		alagoado	16.3002	0.500934
calyptobrit1	duro	42	2	46	117	75.28	16.04	0.004	0.284	snake-like	C_sinebrachiatus	5		pedra vermelha	16.5256	0.848643
leioal7	areia	22	1	23	186	162.3	15	0.004	0.652	snake-like	C_leiolepis	6		alagoado	16.5951	0.484688
calyptopv7	duro	22	2	3	141	148.9	16.04	0.004	0.552	snake-like	C_sinebrachiatus	10		pedra vermelha	16.8171	0.739492
leioal6	duro	22	1	5	137	133.4	15	0.004	0.528	snake-like	C_leiolepis	6		alagoado	16.8434	0.287961
calyptovaca7	duro	42	1	8	136	138.5	16.04	0.004	0.512	snake-like	C_nicterus	5		vacaria	16.8646	0.425872
proteal22	duro	22	1	32	135	104.3	15	0.004	0.412	lacertoid	P_tetradactylus	6		alagoado	16.877	0.206858
calyptovaca11	areia	22	1	11	261	270.8	16.04	0.004	1	snake-like	C_nicterus	10		vacaria	16.8828	0.476132
notoal10	areia	27	1	14	192	181.5	15	0.004	0.712	snake-like	N_ablephara	8		alagoado	16.9944	0.271007
gampsi17	areia	32	2	7	24	178.5	16.04	0.004	0.068	lacertoid	P_paeminosus	2		gameleira	163.653	1
calyptomg2	duro	42	1	8	91	90.71	16.04	0.004	0.332	snake-like	C_sinebrachiatus	5		gameleira	17.0338	0.275269
calyptopv1	duro	42	1	3	47	48.16	16.04	0.004	0.176	snake-like	C_sinebrachiatus	5		pedra vermelha	17.0596	0.538049
scriptot19mancha	duro	32	2	4	140	139.8	15.06	0.004	0.544	snake-like	S_catimbau	16	mov lat	catimbau	17.0641	0.469416
notopi2	duro	32	2	15	187	177.88	15	0.004	0.688	snake-like	N_ablephara	1		alagoado	17.2364	0.54751
leioal8	duro	27	4	13	140	131.7	15	0.004	0.508	snake-like	C_leiolepis	8		alagoado	17.2835	0.515872
scriptot13	duro	27	2	56	168	117.4	15.06	0.004	0.448	snake-like	S_catimbau	6		catimbau	17.4006	0.391125
scriptot20cgorda	duro	22	2	12	124	117.5	15.06	0.004	0.448	snake-like	S_catimbau	8		catimbau	17.4155	0.292854
notoal12	areia	27	1	5	160	164	15	0.004	0.62	snake-like	N_ablephara	2		alagoado	17.6344	0.341948
calyptovaca4	duro	37	2	53	142	103.4	16.04	0.004	0.356	snake-like	C_nicterus	3		vacaria	18.1078	0.309413
notopi5	areia	22	1	9	162	166.4	15	0.004	0.612	snake-like	N_ablephara	6		alagoado	18.1264	0.544431
calyptopv4	duro	37	2	15	120	123.1	16.04	0.004	0.42	snake-like	C_sinebrachiatus	7		pedra vermelha	18.2728	1
calyptopv1	duro	32	1	5	106	118.5	16.04	0.004	0.404	snake-like	C_sinebrachiatus	9		pedra vermelha	18.2866	0.376625
calyptomg2	duro	42	2	6	107	118.7	16.04	0.004	0.404	snake-like	C_sinebrachiatus	5		gameleira	18.3174	0.63242
calyptovaca7	duro	42	2	40	177	161.9	16.04	0.004	0.548	snake-like	C_nicterus	5		vacaria	18.4188	1
calyptopv7	areia	22	1	40	183	169.1	16.04	0.004	0.572	snake-like	C_sinebrachiatus	10		pedra vermelha	18.4308	1
scriptot18	duro	27	2	7	110	115.3	15.06	0.004	0.412	snake-like	S_catimbau	15	mov lat	catimbau	18.5826	0.443928
leioal8	duro	22	3	16	164	165.7	15	0.004	0.592	snake-like	C_leiolepis	6		alagoado	18.6599	0.556956
leioal7	duro	27	1	5	135	146.7	15	0.004	0.52	snake-like	C_leiolepis	2		alagoado	18.8077	0.581681
calyptomg1	duro	37	2	38	163	150.9	16.04	0.004	0.5	snake-like	C_sinebrachiatus	3		gameleira	18.8155	0.560895
scriptot13	duro	22	2	15	130	130.6	15.06	0.004	0.46	snake-like	S_catimbau	8		catimbau	18.8521	0.423751
notopi5	areia	32	1	18	154	154	15	0.004	0.544	snake-like	N_ablephara	1		alagoado	18.8725	0.566843
calyptopv3	duro	37	2	14	69	67.37	16.04	0.004	0.22	snake-like	C_sinebrachiatus	3		pedra vermelha	19.0915	0.890311
micrat11rcomp	areia	37	1	6	125	137.3	15.06	0.004	0.476	lacertoid	M_maximiliani	9		catimbau	19.1531	0.226838
calyptovaca4	areia	42	2	12	106	115.6	16.04	0.004	0.376	snake-like	C_nicterus	5		vacaria	19.1675	0.178847
scriptomedio	duro	22	1	6	95	103	15.06	0.004	0.356	snake-like	S_catimbau	1		catimbau	19.2115	0.406071
calyptopv6	duro	32	2	71	157	106.3	16.04	0.004	0.344	snake-like	C_sinebrachiatus	9		pedra vermelha	19.2651	0.660151
scriptot18regcomp	duro	27	2	10	135	145.6	15.06	0.004	0.5	snake-like	S_catimbau	15		catimbau	19.336	0.470693
leioal9	areia	22	1	0	189	220.3	15	0.004	0.756	snake-like	C_leiolepis	6		alagoado	19.4268	0.510849
calyptopv3	duro	37	1	0	61	76.21	16.04	0.004	0.244	snake-like	C_sinebrachiatus	7		pedra vermelha	19.4723	1
calyptobrit1	duro	37	2	7	72	81.21	16.04	0.004	0.26	snake-like	C_sinebrachiatus	3		pedra vermelha	19.473	1
notoal13	duro	22	2	1	123	143.8	15	0.004	0.488	snake-like	N_ablephara	6		alagoado	19.6448	0.456112
notoal10	duro	27	1	7	110	122.2	15	0.004	0.412	snake-like	N_ablephara	8		alagoado	19.7735	0.392342
notopi5	duro	22	1	7	165	187.8	15	0.004	0.632	snake-like	N_ablephara	6		alagoado	19.8101	0.73465
leioal8	areia	22	2	11	171	191.8	15	0.004	0.64	snake-like	C_leiolepis	6		alagoado	19.9792	0.344537
scriptot17peq	areia	22	1	12	128	139.7	15.06	0.004	0.464	snake-like	S_catimbau	8		catimbau	19.9919	0.52555
leioal10	areia	37	1	10	181	205.2	15	0.004	0.684	snake-like	C_leiolepis	9		alagoado	20	0.528696
notoal12	duro	27	2	19	150	157.3	15	0.004	0.524	snake-like	N_ablephara	2		alagoado	20.0127	0.301076
notoal12	duro	22	1	22	144	147.5	15	0.004	0.488	snake-like	N_ablephara	6		alagoado	20.1503	0.303146
leioal10	duro	22	1	1	132	158.4	15	0.004	0.524	snake-like	C_leiolepis	6		alagoado	20.1527	0.508288
calyptomg2	areia	27	2	6	159	199	16.04	0.004	0.612	snake-like	C_sinebrachiatus	1		gameleira	20.272	0.366566
notoal7	areia	22	1	1	147	178.9	15	0.004	0.584	snake-like	N_ablephara	6		alagoado	20.4224	0.349252
calyptovaca11	duro	37	2	16	118	134.1	16.04	0.004	0.408	snake-like	C_nicterus	7		vacaria	20.4911	0.624464
calyptopv2	areia	42	1	16	137	159.1	16.04	0.004	0.484	snake-like	C_sinebrachiatus	5		pedra vermelha	20.4937	0.636677
leioal9	duro	32	1	0	169	209.2	15	0.004	0.676	snake-like	C_leiolepis	1		alagoado	20.6312	0.674117
scriptot20cfina	areia	22	2	4	145	175.3	15.06	0.004	0.564	snake-like	S_catimbau	8		catimbau	20.6385	1
scriptot17peq	duro	22	1	9	132	153.2	15.06	0.004	0.492	snake-like	S_catimbau	8		catimbau	20.6761	0.493977
calyptopv2	duro	32	1	8	96	117.1	16.04	0.004	0.352	snake-like	C_sinebrachiatus	9		pedra vermelha	20.7401	0.427815
leioal9	duro	27	1	14	136	151.9	15	0.004	0.488	snake-like	C_leiolepis	2		alagoado	20.7514	0.678045
gampsi17	areia	22	1	51	146	126.7	16.04	0.004	0.38	lacertoid	P_paeminosus	4		gameleira	20.7868	0.127018
leioal22	areia	22	1	28	145	146.5	15	0.004	0.468	snake-like	C_leiolepis	6		alagoado	20.8689	0.381168
notoal13	areia	22	1	13	130	146.6	15	0.004	0.468	snake-like	N_ablephara	6		alagoado	20.8832	0.400761
notopi2	duro	42	2	0	148	185.6	15	0.004	0.592	snake-like	N_ablephara	3		alagoado	20.9009	0.663911
notoal12mais	duro	22	1	6	152	183.4	15	0.004	0.584	snake-like	N_ablephara	6		alagoado	20.9361	0.314593
calyptovaca5	duro	42	2	18	96	104.9	16.04	0.004	0.312	snake-like	C_nicterus	5		vacaria	20.9612	0.299372
psiloina	duro	32	2	9	24	197.1	16.04	0.004	0.06	lacertoid	P_paeminosus	2		pedra vermelha	204.8	1
leioal13	areia	22	2	4	159	195.3	15	0.004	0.62	snake-like	C_leiolepis	6		alagoado	21	0.439183
notoal13	duro	27	1	0	122	153.9	15	0.004	0.488	snake-like	N_ablephara	8		alagoado	21.0246	0.488147
leioal7	duro	37	1	20	136	146.5	15	0.004	0.464	snake-like	C_leiolepis	5		alagoado	21.0489	0.650995
notoal12mais	duro	32	2	2	155	195.5	15	0.004	0.612	snake-like	N_ablephara	4		alagoado	21.2963	0.320006
notoal12mais	areia	27	1	11	223	271.2	15	0.004	0.848	snake-like	N_ablephara	8		alagoado	21.3208	0.453538
leioal9	areia	27	1	5	166	206.5	15	0.004	0.644	snake-like	C_leiolepis	2		alagoado	21.3768	0.562127
calyptovaca10	duro	32	2	20	109	122.1	16.04	0.004	0.356	snake-like	C_nicterus	9		vacaria	21.3826	0.784436
leioal13	duro	42	1	6	112	136.2	15	0.004	0.424	snake-like	C_leiolepis	8		alagoado	21.4151	0.658122
calyptopv3	duro	32	1	9	76	92.18	16.04	0.004	0.268	snake-like	C_sinebrachiatus	9		pedra vermelha	21.4436	1
proteal1	areia	37	1	51	163	144.2	15	0.004	0.448	lacertoid	P_tetradactylus	5		alagoado	21.4583	0.255546
scriptot18rlongo	duro	32	2	8	101	120.7	15.06	0.004	0.372	snake-like	S_catimbau	7	mov lat	catimbau	21.5446	1
scriptopeq	areia	22	2	9	121	145.8	15.06	0.004	0.448	snake-like	S_catimbau	1		catimbau	21.61	0.412569
notopi5	duro	37	1	14	140	163.7	15	0.004	0.504	snake-like	N_ablephara	5		alagoado	21.6534	0.803008
proteal18	areia	32	1	37	114	100.5	15	0.004	0.308	lacertoid	P_tetradactylus	4		alagoado	21.7532	0.236291
notopi5	areia	37	1	11	156	190	15	0.004	0.58	snake-like	N_ablephara	5		alagoado	21.8391	0.655944
scriptot17peq	areia	27	1	3	94	120	15.06	0.004	0.364	snake-like	S_catimbau	15		catimbau	21.8905	0.57546
scriptot19	duro	32	1	6	93	115	15.06	0.004	0.348	snake-like	S_catimbau	16		catimbau	21.9429	0.901937
notoal7	areia	27	1	13	170	208.1	15	0.004	0.628	snake-like	N_ablephara	2		alagoado	22.0913	0.377793
notopi2	duro	22	1	39	183	192.4	15	0.004	0.576	snake-like	N_ablephara	6		alagoado	22.2685	0.707353
calyptovaca10	duro	42	2	73	200	182	16.04	0.004	0.508	snake-like	C_nicterus	5		vacaria	22.3359	0.819407
calyptobrit1	areia	37	1	4	70	94.99	16.04	0.004	0.264	snake-like	C_sinebrachiatus	3		pedra vermelha	22.4321	0.664816
gampsi16	areia	22	1	11	137	181.4	16.04	0.004	0.504	lacertoid	P_paeminosus	4		gameleira	22.4389	1
proteal1	areia	27	1	39	148	147.1	15	0.004	0.436	lacertoid	P_tetradactylus	2		alagoado	22.4924	0.26786
leioal22	areia	32	1	21	180	214.9	15	0.004	0.636	snake-like	C_leiolepis	4		alagoado	22.5262	0.411438
calyptopv6	areia	32	2	20	139	172.1	16.04	0.004	0.476	snake-like	C_sinebrachiatus	9		pedra vermelha	22.5408	0.619176
calyptovaca8	duro	42	2	16	139	179.2	16.04	0.004	0.492	snake-like	C_nicterus	5		vacaria	22.7075	0.68953
calyptomg1	areia	27	2	6	144	201.2	16.04	0.004	0.552	snake-like	C_sinebrachiatus	1		gameleira	22.724	0.327548
calyptopv7	duro	32	2	64	152	128.4	16.04	0.004	0.352	snake-like	C_sinebrachiatus	9		pedra vermelha	22.7414	1
notoal7	duro	22	2	17	161	197.7	15	0.004	0.576	snake-like	N_ablephara	6		alagoado	22.8819	0.474979
leioal10	areia	22	2	0	125	171.9	15	0.004	0.5	snake-like	C_leiolepis	6		alagoado	22.92	0.605885
vanzopv2	areia	22	1	31	156	184.5	16.04	0.004	0.5	lacertoid	V_rubricauda	10		pedra vermelha	23.005	0.272645
calyptovaca2	areia	42	2	8	103	140.4	16.04	0.004	0.38	snake-like	C_nicterus	5		vacaria	23.0345	0.494027
leioal13	duro	22	1	14	138	172.1	15	0.004	0.496	snake-like	C_leiolepis	6		alagoado	23.1317	0.710877
notoal3	areia	27	1	0	97	134.9	15	0.004	0.388	snake-like	N_ablephara	8		alagoado	23.1787	0.369873
leioal5	duro	27	2	4	122	164.5	15	0.004	0.472	snake-like	C_leiolepis	2		alagoado	23.2345	0.499013
notoal3	duro	27	1	10	137	177.5	15	0.004	0.508	snake-like	N_ablephara	8		alagoado	23.294	0.413694
calyptovaca3	duro	27	1	22	159	205.1	16.04	0.004	0.548	snake-like	C_nicterus	1		vacaria	23.3335	0.603566
calyptobrit1	duro	37	1	11	70	88.4	16.04	0.004	0.236	snake-like	C_sinebrachiatus	3		pedra vermelha	23.3526	0.843165
calyptovaca11	duro	42	2	49	151	153.6	16.04	0.004	0.408	snake-like	C_nicterus	5		vacaria	23.4707	0.619784
scriptot18rlongo	duro	22	2	3	110	151.7	15.06	0.004	0.428	snake-like	S_catimbau	8		catimbau	23.5351	0.659422
calyptomg2	duro	22	1	22	105	125.7	16.04	0.004	0.332	snake-like	C_sinebrachiatus	4		gameleira	23.6044	0.38145
calyptomg3	duro	42	2	9	100	137.9	16.04	0.004	0.364	snake-like	C_sinebrachiatus	5		gameleira	23.6188	0.627967
proery1	areia	22	2	16	103	123.3	15	0.004	0.348	lacertoid	P_erythrocercus	1		alagoado	23.6207	0.21832
scriptot19	duro	37	2	33	110	109.6	15.06	0.004	0.308	snake-like	S_catimbau	9		catimbau	23.6284	0.97122
notopi5	duro	27	2	47	179	187.6	15	0.004	0.528	snake-like	N_ablephara	2		alagoado	23.6869	0.878417
scriptot13	areia	27	2	51	146	135.9	15.06	0.004	0.38	snake-like	S_catimbau	6		catimbau	23.7471	0.160867
leioal20	areia	32	2	41	196	221.4	15	0.004	0.62	snake-like	C_leiolepis	4		alagoado	23.8065	0.501887
calyptopv6	areia	37	1	9	125	177.6	16.04	0.004	0.464	snake-like	C_sinebrachiatus	7		pedra vermelha	23.8628	0.655489
leioal13	areia	42	1	17	158	202.5	15	0.004	0.564	snake-like	C_leiolepis	8		alagoado	23.9362	0.500588
scriptot18regcomp	duro	22	1	5	123	170.2	15.06	0.004	0.472	snake-like	S_catimbau	8		catimbau	23.9438	0.58286
leioal13	duro	32	1	21	132	159.6	15	0.004	0.444	snake-like	C_leiolepis	4		alagoado	23.964	0.736454
notoal7	duro	27	2	0	136	195.6	15	0.004	0.544	snake-like	N_ablephara	2		alagoado	23.9706	1
calyptopv4	areia	32	1	13	118	161.5	16.04	0.004	0.42	snake-like	C_sinebrachiatus	9		pedra vermelha	23.9728	0.491783
leioal8	duro	32	2	21	116	137	15	0.004	0.38	snake-like	C_leiolepis	4		alagoado	24.0351	0.717392
scriptot18rlongo	areia	22	2	11	117	153.5	15.06	0.004	0.424	snake-like	S_catimbau	8		catimbau	24.0391	0.569062
calyptovaca3	duro	37	2	25	112	134.6	16.04	0.004	0.348	snake-like	C_nicterus	3		vacaria	24.1136	1
notoal12mais	areia	22	1	11	164	221.4	15	0.004	0.612	snake-like	N_ablephara	6		alagoado	24.1176	0.513034
leioal20	areia	22	1	0	140	202.9	15	0.004	0.56	snake-like	C_leiolepis	6		alagoado	24.1548	0.50923
leioal21	areia	32	1	18	187	245.1	15	0.004	0.676	snake-like	C_leiolepis	4		alagoado	24.1716	0.528295
scriptomedio	areia	22	1	55	155	146	15.06	0.004	0.4	snake-like	S_catimbau	1		catimbau	24.2364	0.462534
calyptopv4	duro	32	1	6	73	104.2	16.04	0.004	0.268	snake-like	C_sinebrachiatus	9		pedra vermelha	24.2398	0.889005
scriptot18regcomp	duro	42	1	13	108	138.9	15.06	0.004	0.38	snake-like	S_catimbau	10	mov lat	catimbau	24.2713	0.590834
scriptot19	duro	27	1	11	101	131.9	15.06	0.004	0.36	snake-like	S_catimbau	6		catimbau	24.3286	1
scriptot19mancha	areia	32	1	9	77	99.77	15.06	0.004	0.272	snake-like	S_catimbau	16		catimbau	24.356	0.59576
leioal5	areia	22	1	20	148	187.6	15	0.004	0.512	snake-like	C_leiolepis	6		alagoado	24.4271	0.581865
leioal22	duro	37	2	56	138	120.6	15	0.004	0.328	snake-like	C_leiolepis	5		alagoado	24.5122	0.760048
calyptobrit1	areia	32	2	3	57	85.18	16.04	0.004	0.216	snake-like	C_sinebrachiatus	2		pedra vermelha	24.5855	0.728638
scriptopeq	duro	32	2	6	72	97.89	15.06	0.004	0.264	snake-like	S_catimbau	7		catimbau	24.6212	0.762208
scriptot17	duro	27	2	6	81	112.1	15.06	0.004	0.3	snake-like	S_catimbau	15	mov lat	catimbau	24.8119	0.783916
scriptot18regcomp	areia	22	2	8	126	176.9	15.06	0.004	0.472	snake-like	S_catimbau	8		catimbau	24.8863	0.492872
calyptopv3	areia	37	1	0	64	102.6	16.04	0.004	0.256	snake-like	C_sinebrachiatus	7		pedra vermelha	24.9864	0.934927
calyptovaca2	duro	42	2	17	120	165.4	16.04	0.004	0.412	snake-like	C_nicterus	5		vacaria	25.0284	0.384924
calyptovaca9	duro	32	2	2	91	143.1	16.04	0.004	0.356	snake-like	C_nicterus	9		vacaria	25.0602	1
calyptobrit2	duro	37	1	0	97	156	16.04	0.004	0.388	snake-like	C_sinebrachiatus	3		pedra vermelha	25.0662	0.341807
scriptot17	duro	32	2	0	83	125.4	15.06	0.004	0.332	snake-like	S_catimbau	7	mov lat	catimbau	25.0804	0.7924
calyptovaca1	areia	37	2	36	107	114.3	16.04	0.004	0.284	snake-like	C_nicterus	3		vacaria	25.0913	0.382974
calyptovaca8	duro	32	2	10	98	142.2	16.04	0.004	0.352	snake-like	C_nicterus	9		vacaria	25.1856	0.764781
calyptobrit2	duro	37	2	6	119	182.8	16.04	0.004	0.452	snake-like	C_sinebrachiatus	7		pedra vermelha	25.2135	0.810408
scriptot18	areia	27	1	12	122	167.7	15.06	0.004	0.44	snake-like	S_catimbau	15		catimbau	25.3079	0.72193
scriptot18	areia	37	1	9	107	149.5	15.06	0.004	0.392	snake-like	S_catimbau	9		catimbau	25.3239	0.722386
leioal5	duro	22	2	9	111	155.3	15	0.004	0.408	snake-like	C_leiolepis	6		alagoado	25.3758	0.545003
notoal10	areia	22	1	12	109	148	15	0.004	0.388	snake-like	N_ablephara	6		alagoado	25.4296	0.405521
notoal14	duro	22	2	13	124	169.7	15	0.004	0.444	snake-like	N_ablephara	6		alagoado	25.4805	0.484976
scriptogrande	duro	42	2	10	72	95.94	15.06	0.004	0.248	snake-like	S_catimbau	3		catimbau	25.6876	0.77511
notoal12	areia	22	3	14	113	153.3	15	0.004	0.396	snake-like	N_ablephara	6		alagoado	25.8081	0.500443
leioal13	areia	27	3	58	190	204.7	15	0.004	0.528	snake-like	C_leiolepis	8		alagoado	25.846	0.540528
notoal12mais	duro	37	1	0	118	183.7	15	0.004	0.472	snake-like	N_ablephara	5		alagoado	25.9463	0.389879
calyptopv7	duro	32	1	0	62	103.5	16.04	0.004	0.248	snake-like	C_sinebrachiatus	9		pedra vermelha	26.0186	0.680708
calyptopv2	duro	42	2	15	84	115.2	16.04	0.004	0.276	snake-like	C_sinebrachiatus	5		pedra vermelha	26.0219	0.536766
calyptomg1	duro	22	1	7	101	157.1	16.04	0.004	0.376	snake-like	C_sinebrachiatus	4		gameleira	26.0486	0.776517
leioal6	areia	22	2	9	156	230.4	15	0.004	0.588	snake-like	C_leiolepis	6		alagoado	26.1224	0.516628
notopi5	areia	27	1	6	132	198.4	15	0.004	0.504	snake-like	N_ablephara	2		alagoado	26.2434	0.788229
leioal21	duro	22	1	1	121	189.7	15	0.004	0.48	snake-like	C_leiolepis	6		alagoado	26.3472	0.528786
calyptovaca11	areia	37	1	44	174	219.8	16.04	0.004	0.52	snake-like	C_nicterus	7		vacaria	26.3524	0.743195
vanzodana2fil	duro	22	1	59	141	138.9	16.04	0.004	0.328	lacertoid	V_rubricauda	4		vacaria	26.4012	0.336194
scriptot17	duro	22	1	9	122	179.9	15.06	0.004	0.452	snake-like	S_catimbau	8		catimbau	26.4282	0.635564
scriptot17	areia	27	2	4	92	140.3	15.06	0.004	0.352	snake-like	S_catimbau	15		catimbau	26.4661	0.573121
calyptomg3	duro	27	1	11	107	163.4	16.04	0.004	0.384	snake-like	C_sinebrachiatus	1		gameleira	26.5287	0.511999
leioal22	duro	32	1	9	112	164	15	0.004	0.412	snake-like	C_leiolepis	4		alagoado	26.5372	0.822838
leioal22	duro	27	1	16	144	204	15	0.004	0.512	snake-like	C_leiolepis	8		alagoado	26.5625	0.823621
scriptot19	areia	32	2	9	95	138.1	15.06	0.004	0.344	snake-like	S_catimbau	16		catimbau	26.6569	0.766595
calyptomg2	duro	27	1	11	115	177.9	16.04	0.004	0.416	snake-like	C_sinebrachiatus	1		gameleira	26.6611	0.430846
notoal14	duro	27	1	5	94	142.4	15	0.004	0.356	snake-like	N_ablephara	8		alagoado	26.6667	0.507553
scriptot18rlongo	areia	32		15	107	148.1	15.06	0.004	0.368	snake-like	S_catimbau	7		catimbau	26.7228	1
calyptopv3	areia	42	1	5	56	87.45	16.04	0.004	0.204	snake-like	C_sinebrachiatus	5		pedra vermelha	26.7255	1
gampsi1	areia	22	2	27	119	157.8	16.04	0.004	0.368	lacertoid	P_paeminosus	10		gameleira	26.7334	0.330076
calyptomg1	areia	37	1	1	103	175.5	16.04	0.004	0.408	snake-like	C_sinebrachiatus	3		gameleira	26.8171	0.386548
vanzodana2list	areia	22	1	86	180	161.9	16.04	0.004	0.376	lacertoid	V_rubricauda	4		vacaria	26.8445	0.215193
calyptovaca3	duro	22	2	10	103	160.2	16.04	0.004	0.372	snake-like	C_nicterus	4		vacaria	26.8482	0.694479
scriptot18regcomp	areia	27	2	8	108	161.8	15.06	0.004	0.4	snake-like	S_catimbau	15		catimbau	26.8592	0.531945
scriptot13	duro	27	1	1	103	165.2	15.06	0.004	0.408	snake-like	S_catimbau	6	mov lat	catimbau	26.8859	0.718158
leioal5	areia	27	1	5	98	150.3	15	0.004	0.372	snake-like	C_leiolepis	2		alagoado	26.9355	0.641616
notopi5	duro	42	2	10	116	171.5	15	0.004	0.424	snake-like	N_ablephara	3		alagoado	26.9654	1
calyptovaca7	areia	42	1	6	135	223.6	16.04	0.004	0.516	snake-like	C_nicterus	5		vacaria	27.0158	1
scriptot18	areia	22	2	3	116	183.9	15.06	0.004	0.452	snake-like	S_catimbau	8		catimbau	27.0158	0.770651
leioal5	duro	32	2	5	93	142.9	15	0.004	0.352	snake-like	C_leiolepis	4		alagoado	27.0644	0.581269
calyptovaca8	areia	32	1	28	130	177.8	16.04	0.004	0.408	snake-like	C_nicterus	9		vacaria	27.1686	0.466079
calyptovaca11	duro	22	1	53	182	225.3	16.04	0.004	0.516	snake-like	C_nicterus	10		vacaria	27.2212	0.718822
calyptovaca10	duro	37	1	43	135	160.9	16.04	0.004	0.368	snake-like	C_nicterus	7		vacaria	27.2586	1
calyptopv4	duro	42	1	9	92	145.2	16.04	0.004	0.332	snake-like	C_sinebrachiatus	5		pedra vermelha	27.2662	1
calyptovaca10	areia	32	1	14	97	145.2	16.04	0.004	0.332	snake-like	C_nicterus	9		vacaria	27.2662	0.859772
notoal10	duro	32	1	6	93	142.6	15	0.004	0.348	snake-like	N_ablephara	4		alagoado	27.318	0.54204
calyptovaca1	duro	27	1	3	78	131.5	16.04	0.004	0.3	snake-like	C_nicterus	1		vacaria	27.3275	1
scriptopeq	duro	37	2	0	68	112.2	15.06	0.004	0.272	snake-like	S_catimbau	2		catimbau	27.3904	0.847936
calyptopv4	areia	37	1	10	98	154.8	16.04	0.004	0.352	snake-like	C_sinebrachiatus	7		pedra vermelha	27.4173	0.562444
scriptot13	duro	32	2	8	86	128.9	15.06	0.004	0.312	snake-like	S_catimbau	7		catimbau	27.433	0.616628
proteal1	areia	32	2	87	189	167.9	15	0.004	0.408	lacertoid	P_tetradactylus	1		alagoado	27.4346	0.326717
notopi2	areia	22	1	27	144	193.2	15	0.004	0.468	snake-like	N_ablephara	6		alagoado	27.5214	0.588675
calyptovaca4	duro	22	2	6	67	107.8	16.04	0.004	0.244	snake-like	C_nicterus	4		vacaria	27.5438	0.47065
scriptogrande	duro	22	1	48	152	172.6	15.06	0.004	0.416	snake-like	S_catimbau	1		catimbau	27.5501	0.83131
notoal13	areia	37	2	27	108	134	15	0.004	0.324	snake-like	N_ablephara	9		alagoado	27.572	0.529124
leioal21	duro	37	2	41	145	172.6	15	0.004	0.416	snake-like	C_leiolepis	5		alagoado	27.6603	0.555138
calyptobrit1	duro	32	2	6	56	88.85	16.04	0.004	0.2	snake-like	C_sinebrachiatus	2		pedra vermelha	27.6964	1
scriptot19mancha	duro	27	1	7	97	150.5	15.06	0.004	0.36	snake-like	S_catimbau	6	mov lat	catimbau	27.7593	0.763631
scriptot20cfina	duro	22	2	9	123	190.7	15.06	0.004	0.456	snake-like	S_catimbau	8		catimbau	27.769	0.882536
scriptot20cgorda	areia	22	1	3	106	172.9	15.06	0.004	0.412	snake-like	S_catimbau	8		catimbau	27.8659	0.47621
calyptovaca2	duro	27	1	14	103	159.7	16.04	0.004	0.356	snake-like	C_nicterus	1		vacaria	27.9673	0.430122
scriptot18	duro	42	2	7	90	140.3	15.06	0.004	0.332	snake-like	S_catimbau	10	mov lat	catimbau	28.0604	0.670347
vanzodana2list	duro	22	1	36	160	223.7	16.04	0.004	0.496	lacertoid	V_rubricauda	4		vacaria	28.1177	0.188904
calyptovaca2	areia	27	1	0	98	176.9	16.04	0.004	0.392	snake-like	C_nicterus	1		vacaria	28.1344	0.603405
notoal6prima	areia	32	2	9	82	123.3	15	0.004	0.292	snake-like	N_ablephara	4		alagoado	28.1507	0.549047
scriptot20cfina	duro	27	1	11	123	190	15.06	0.004	0.448	snake-like	S_catimbau	15	mov lat	catimbau	28.1612	0.894998
scriptot17peq	duro	32	1	11	98	147.6	15.06	0.004	0.348	snake-like	S_catimbau	7	mov lat	catimbau	28.1632	0.672853
leioal22	duro	22	3	37	146	184.4	15	0.004	0.436	snake-like	C_leiolepis	6		alagoado	28.1957	0.874263
scriptomedio	duro	27	1	5	84	134.2	15.06	0.004	0.316	snake-like	S_catimbau	6	mov lat	catimbau	28.1994	0.596047
vanzonegro	areia	22	2	50	142	156.3	15.06	0.004	0.368	lacertoid	V_rubricauda	8		catimbau	28.2024	0.340873
notoal13	areia	27	2	8	107	167.6	15	0.004	0.396	snake-like	N_ablephara	8		alagoado	28.2155	0.541472
calyptopv5	duro	32	1	7	91	152.1	16.04	0.004	0.336	snake-like	C_sinebrachiatus	9		pedra vermelha	28.2219	0.566933
calyptomg3	duro	22	1	5	82	139.9	16.04	0.004	0.308	snake-like	C_sinebrachiatus	4		gameleira	28.318	0.546531
calyptomg1	duro	42	2	20	126	192.9	16.04	0.004	0.424	snake-like	C_sinebrachiatus	5		gameleira	28.3636	0.360537
leioal7	duro	32	3	9	97	150.2	15	0.004	0.352	snake-like	C_leiolepis	1		alagoado	28.447	0.879803
calyptovaca4	duro	37	1	12	75	115	16.04	0.004	0.252	snake-like	C_nicterus	7		vacaria	28.4507	1
calyptovaca3	duro	37	1	5	90	155.2	16.04	0.004	0.34	snake-like	C_nicterus	3		vacaria	28.4583	0.736126
scriptot17peq	duro	27	2	10	104	161.4	15.06	0.004	0.376	snake-like	S_catimbau	15	mov lat	catimbau	28.503	0.680972
notoal13	duro	32	1	3	67	109.6	15	0.004	0.256	snake-like	N_ablephara	4		alagoado	28.5417	0.662678
calyptopv4	duro	22	2	3	77	135.7	16.04	0.004	0.296	snake-like	C_sinebrachiatus	4		pedra vermelha	28.5814	0.990045
notopi2	areia	27	2	51	163	192.1	15	0.004	0.448	snake-like	N_ablephara	2		alagoado	28.5863	0.611453
scriptot20cgorda	areia	27	1	4	98	161.9	15.06	0.004	0.376	snake-like	S_catimbau	15		catimbau	28.5913	0.488607
leioal8	areia	27	3	13	148	231.6	15	0.004	0.54	snake-like	C_leiolepis	8		alagoado	28.5926	0.493073
calyptovaca2	areia	37	1	18	110	169.7	16.04	0.004	0.368	snake-like	C_nicterus	3		vacaria	28.7495	0.616597
leioal22	areia	27	1	0	115	199	15	0.004	0.46	snake-like	C_leiolepis	8		alagoado	28.8406	0.526769
proery1	duro	22	2	22	123	174.8	15	0.004	0.404	lacertoid	P_erythrocercus	1		alagoado	28.8449	0.21522
calyptopv4	duro	42	2	6	96	166.7	16.04	0.004	0.36	snake-like	C_sinebrachiatus	5		pedra vermelha	28.8688	1
scriptot20cfina	areia	27	1	12	121	189.8	15.06	0.004	0.436	snake-like	S_catimbau	15		catimbau	28.9058	0.471171
calyptovaca5	areia	22	1	23	126	191.1	16.04	0.004	0.412	snake-like	C_nicterus	4		vacaria	28.9174	0.61573
calyptovaca5	duro	37	1	39	133	174.5	16.04	0.004	0.376	snake-like	C_nicterus	7		vacaria	28.9336	0.876169
calyptomg2	duro	37	1	7	79	133.8	16.04	0.004	0.288	snake-like	C_sinebrachiatus	3		gameleira	28.964	1
calyptovaca4	areia	37	1	13	86	136.6	16.04	0.004	0.292	snake-like	C_nicterus	7		vacaria	29.1651	0.272132
calyptopv6	duro	42	2	15	91	142.3	16.04	0.004	0.304	snake-like	C_sinebrachiatus	5		pedra vermelha	29.1828	1
scriptot19	areia	27	2	22	107	149.5	15.06	0.004	0.34	snake-like	S_catimbau	6		catimbau	29.1969	0.839639
calyptovaca8	duro	42	1	21	97	142.7	16.04	0.004	0.304	snake-like	C_nicterus	5		vacaria	29.2648	1
leioal20	duro	42	1	9	111	179.3	15	0.004	0.408	snake-like	C_leiolepis	3		alagoado	29.2974	0.927672
calyptomg2	areia	42	1	0	94	177	16.04	0.004	0.376	snake-like	C_sinebrachiatus	5		gameleira	29.3482	0.530683
scriptopeq	duro	27	1	47	126	140.3	15.06	0.004	0.316	snake-like	S_catimbau	6		catimbau	29.4812	0.912661
calyptovaca11	areia	32	2	38	144	201.5	16.04	0.004	0.424	snake-like	C_nicterus	9		vacaria	29.6282	0.83558
notopi2	duro	37	1	5	96	161.8	15	0.004	0.364	snake-like	N_ablephara	5		alagoado	29.6337	0.941306
leioal9	areia	37	2	24	138	203	15	0.004	0.456	snake-like	C_leiolepis	5		alagoado	29.6784	0.780425
calyptovaca2	duro	22	1	10	73	120	16.04	0.004	0.252	snake-like	C_nicterus	4		vacaria	29.6877	0.456581
notoal12mais	duro	27	1	1	110	194.2	15	0.004	0.436	snake-like	N_ablephara	8		alagoado	29.6942	0.446196
leioal9	duro	37	1	4	107	183.9	15	0.004	0.412	snake-like	C_leiolepis	5		alagoado	29.7573	0.97231
leioal7	areia	42	2	36	116	143.5	15	0.004	0.32	snake-like	C_leiolepis	3		alagoado	29.8958	0.87316
scriptot13	areia	32	2	3	76	131.7	15.06	0.004	0.292	snake-like	S_catimbau	7		catimbau	29.9487	0.202877
proteal19	areia	22	2	34	85	91.86	15	0.004	0.204	lacertoid	P_tetradactylus	6		alagoado	30.0196	0.427156
calyptopv5	duro	32	2	14	88	143.2	16.04	0.004	0.296	snake-like	C_sinebrachiatus	9		pedra vermelha	30.1611	1
leioal10	duro	37	1	7	124	212	15	0.004	0.468	snake-like	C_leiolepis	9		alagoado	30.1994	0.761686
notoal6prima	duro	32	2	16	84	124	15	0.004	0.272	snake-like	N_ablephara	4		alagoado	30.3922	0.656635
scriptogrande	duro	32	2	4	84	146.6	15.06	0.004	0.32	snake-like	S_catimbau	7		catimbau	30.42	0.917909
scriptot13	duro	32	1	7	84	141.4	15.06	0.004	0.308	snake-like	S_catimbau	7	mov lat	catimbau	30.4841	0.814271
calyptovaca6	duro	42	2	7	81	145	16.04	0.004	0.296	snake-like	C_nicterus	5		vacaria	30.5402	0.836355
calyptomg1	duro	27	1	9	102	182.3	16.04	0.004	0.372	snake-like	C_sinebrachiatus	1		gameleira	30.552	0.910765
calyptobrit1	areia	22	1	5	63	113.8	16.04	0.004	0.232	snake-like	C_sinebrachiatus	4		pedra vermelha	30.5809	0.906321
leioal9	duro	42	1	13	126	207.5	15	0.004	0.452	snake-like	C_leiolepis	3		alagoado	30.6047	1
calyptopv2	areia	22	2	8	90	161.6	16.04	0.004	0.328	snake-like	C_sinebrachiatus	4		pedra vermelha	30.7159	0.954249
leioal20	areia	27	3	12	108	178	15	0.004	0.384	snake-like	C_leiolepis	2		alagoado	30.9028	0.651492
scriptot20cgorda	duro	42	1	4	97	174	15.06	0.004	0.372	snake-like	S_catimbau	10	mov lat	catimbau	31.0586	0.522273
vanzodana1grande	areia	27	1	55	156	201.6	16.04	0.004	0.404	lacertoid	V_rubricauda	1		vacaria	31.1103	1
calyptobrit2	duro	42	2	8	86	155.7	16.04	0.004	0.312	snake-like	C_sinebrachiatus	5		pedra vermelha	31.1121	1
calyptovaca1	duro	37	2	47	108	122	16.04	0.004	0.244	snake-like	C_nicterus	3		vacaria	31.1721	0.53206
scriptot20cfina	duro	32	1	15	97	154.2	15.06	0.004	0.328	snake-like	S_catimbau	16	mov lat	catimbau	31.2166	0.992104
leioal8	duro	37	2	0	87	163.5	15	0.004	0.348	snake-like	C_leiolepis	5		alagoado	31.3218	0.934885
calyptovaca10	areia	37	1	0	78	156.8	16.04	0.004	0.312	snake-like	C_nicterus	7		vacaria	31.3319	0.987976
calyptopv5	areia	32	1	2	75	146.9	16.04	0.004	0.292	snake-like	C_sinebrachiatus	9		pedra vermelha	31.3642	0.637991
scriptot20cfina	duro	27	2	33	126	176	15.06	0.004	0.372	snake-like	S_catimbau	15		catimbau	31.4156	0.891426
scriptot20cfina	duro	37	2	14	102	166.8	15.06	0.004	0.352	snake-like	S_catimbau	9	mov lat	catimbau	31.465	1
scriptomedio	duro	32	2	16	90	140.3	15.06	0.004	0.296	snake-like	S_catimbau	7		catimbau	31.4732	0.665244
vanzopv1	areia	22	1	5	112	216.1	16.04	0.004	0.428	lacertoid	V_rubricauda	10		vacaria	31.478	0.234404
notopi2	duro	27	1	5	113	204	15	0.004	0.432	snake-like	N_ablephara	2		alagoado	31.4815	1
calyptopv7	areia	32	1	102	193	184.1	16.04	0.004	0.364	snake-like	C_sinebrachiatus	9		pedra vermelha	31.5317	0.758654
leioal20	duro	27	1	1	99	185.7	15	0.004	0.392	snake-like	C_leiolepis	2		alagoado	31.5816	1
notoal6prima	areia	27	3	25	93	128.9	15	0.004	0.272	snake-like	N_ablephara	8		alagoado	31.5931	0.616188
scriptot17	duro	37	1	8	68	114.4	15.06	0.004	0.24	snake-like	S_catimbau	2	mov lat	catimbau	31.6512	1
calyptomg3	duro	42	1	31	94	128	16.04	0.004	0.252	snake-like	C_sinebrachiatus	5		gameleira	31.6669	0.611164
calyptopv1	duro	37	1	33	103	142.4	16.04	0.004	0.28	snake-like	C_sinebrachiatus	7		pedra vermelha	31.7064	1
calyptovaca10	areia	42	1	29	101	146.5	16.04	0.004	0.288	snake-like	C_nicterus	5		vacaria	31.7133	1
calyptomg2	areia	22	1	14	118	212.1	16.04	0.004	0.416	snake-like	C_sinebrachiatus	4		gameleira	31.7865	0.574774
calyptobrit2	duro	42	1	11	66	112.2	16.04	0.004	0.22	snake-like	C_sinebrachiatus	5		pedra vermelha	31.7955	0.433569
calyptomg2	duro	37	2	22	88	134.9	16.04	0.004	0.264	snake-like	C_sinebrachiatus	3		gameleira	31.8569	0.514811
scriptomedio	areia	27	1	15	103	169	15.06	0.004	0.352	snake-like	S_catimbau	6		catimbau	31.8801	0.608408
calyptopv4	areia	42	*	8	79	145.3	16.04	0.004	0.284	snake-like	C_sinebrachiatus	5		pedra vermelha	31.8965	0.654332
scriptot17	duro	32	1	50	121	136.5	15.06	0.004	0.284	snake-like	S_catimbau	7		catimbau	31.9146	0.767504
leioal7	areia	32	3	0	94	180.3	15	0.004	0.376	snake-like	C_leiolepis	1		alagoado	31.9681	0.933683
calyptovaca1	duro	42	1	13	63	102.7	16.04	0.004	0.2	snake-like	C_nicterus	5		vacaria	32.0137	0.546426
calyptobrit2	areia	37	1	50	150	206.4	16.04	0.004	0.4	snake-like	C_sinebrachiatus	7		pedra vermelha	32.1696	0.739439
calyptovaca8	duro	37	2	11	81	144.5	16.04	0.004	0.28	snake-like	C_nicterus	7		vacaria	32.174	0.97699
calyptomg2	areia	37	1	19	101	169.3	16.04	0.004	0.328	snake-like	C_sinebrachiatus	3		gameleira	32.1795	0.58188
calyptopv2	areia	37	1	9	78	142.5	16.04	0.004	0.276	snake-like	C_sinebrachiatus	7		pedra vermelha	32.1886	1
leioal22	duro	42	1	10	107	187.7	15	0.004	0.388	snake-like	C_leiolepis	8		alagoado	32.2509	1
scriptopeq	duro	42	1	7	68	118.7	15.06	0.004	0.244	snake-like	S_catimbau	3	mov lat	catimbau	32.3025	1
leioal7	duro	42	1	98	193	184.3	15	0.004	0.38	snake-like	C_leiolepis	3		alagoado	32.3333	1
calyptomg3	duro	37	1	1	79	162.2	16.04	0.004	0.312	snake-like	C_sinebrachiatus	3		gameleira	32.411	0.625524
calyptovaca1	areia	27	2	9	76	139.4	16.04	0.004	0.268	snake-like	C_nicterus	1		vacaria	32.4283	1
calyptopv1	duro	37	2	16	79	131.1	16.04	0.004	0.252	snake-like	C_sinebrachiatus	3		pedra vermelha	32.4338	0.667996
micrat11rcomp	areia	22	2	51	129	152.4	15.06	0.004	0.312	lacertoid	M_maximiliani	8		catimbau	32.4344	0.384134
leioal13	areia	32	2	10	111	196.9	15	0.004	0.404	snake-like	C_leiolepis	4		alagoado	32.4917	0.679515
notoal14	areia	27	1	13	106	181.5	15	0.004	0.372	snake-like	N_ablephara	8		alagoado	32.5269	0.580772
leioal13	duro	37	1	8	92	164	15	0.004	0.336	snake-like	C_leiolepis	9		alagoado	32.5397	1
leioal6	duro	37	2	2	79	150.5	15	0.004	0.308	snake-like	C_leiolepis	5		alagoado	32.5758	0.556926
scriptot18	areia	32	2	3	84	159	15.06	0.004	0.324	snake-like	S_catimbau	7		catimbau	32.5857	0.929537
calyptomg1	areia	22	1	5	90	177.9	16.04	0.004	0.34	snake-like	C_sinebrachiatus	4		gameleira	32.6207	0.470201
proteal22	areia	27	1	5	72	131.4	15	0.004	0.268	lacertoid	P_tetradactylus	8		alagoado	32.6866	0.550511
calyptomg1	areia	42	2	5	82	161.5	16.04	0.004	0.308	snake-like	C_sinebrachiatus	5		gameleira	32.6902	0.471203
scriptomedio	duro	37	1	5	65	118.2	15.06	0.004	0.24	snake-like	S_catimbau	2		catimbau	32.7025	0.691228
calyptopv5	duro	37	2	4	68	134.5	16.04	0.004	0.256	snake-like	C_sinebrachiatus	7		pedra vermelha	32.755	0.657997
calyptovaca11	duro	32	1	3	78	157.9	16.04	0.004	0.3	snake-like	C_nicterus	9		vacaria	32.8138	1
calyptopv2	duro	37	1	9	60	107.5	16.04	0.004	0.204	snake-like	C_sinebrachiatus	3		pedra vermelha	32.8529	0.677672
vanzopv2	duro	22	1	4	101	204.7	16.04	0.004	0.388	lacertoid	V_rubricauda	10		pedra vermelha	32.8914	0.37023
calyptovaca8	duro	22	1	2	95	196.5	16.04	0.004	0.372	snake-like	C_nicterus	4		vacaria	32.9318	1
calyptopv7	duro	42	2	9	76	141.6	16.04	0.004	0.268	snake-like	C_sinebrachiatus	5		pedra vermelha	32.94	0.861788
calyptovaca5	duro	42	1	2	66	135.6	16.04	0.004	0.256	snake-like	C_nicterus	5		vacaria	33.0229	1
vanzodana2semi	areia	22	2	19	112	197.2	16.04	0.004	0.372	lacertoid	V_rubricauda	4		vacaria	33.0491	0.45303
notoal7	duro	27	1	55	157	202.4	15	0.004	0.408	snake-like	N_ablephara	2		alagoado	33.0719	0.686501
scriptogrande	duro	27	1	16	99	165.7	15.06	0.004	0.332	snake-like	S_catimbau	6		catimbau	33.1405	1
notopi5	areia	42	1	0	85	169.8	15	0.004	0.34	snake-like	N_ablephara	3		alagoado	33.2941	1
scriptot19mancha	areia	27	1	21	96	150.5	15.06	0.004	0.3	snake-like	S_catimbau	6		catimbau	33.3112	0.814809
notoal12	duro	37	1	4	89	170	15	0.004	0.34	snake-like	N_ablephara	5		alagoado	33.3333	0.501475
leioal10	areia	32	1	5	110	210.2	15	0.004	0.42	snake-like	C_leiolepis	4		alagoado	33.3651	0.881999
scriptot13	areia	42	1	8	61	106.7	15.06	0.004	0.212	snake-like	S_catimbau	3		catimbau	33.4198	0.226391
calyptovaca9	areia	32	1	12	96	180.3	16.04	0.004	0.336	snake-like	C_nicterus	9		vacaria	33.4543	0.736735
leioal8	duro	42	2	5	103	197	15	0.004	0.392	snake-like	C_leiolepis	8		alagoado	33.5034	1
calyptomg1	duro	32	2	10	98	189.4	16.04	0.004	0.352	snake-like	C_sinebrachiatus	2		gameleira	33.5454	1
calyptomg3	areia	37	2	3	87	181.5	16.04	0.004	0.336	snake-like	C_sinebrachiatus	3		gameleira	33.677	0.598988
scriptot20cfina	duro	42	1	7	73	133.9	15.06	0.004	0.264	snake-like	S_catimbau	10		catimbau	33.6784	0.955635
calyptobrit1	areia	42	1	25	64	84.43	16.04	0.004	0.156	snake-like	C_sinebrachiatus	5		pedra vermelha	33.7418	1
calyptomg3	areia	42	1	2	94	199.2	16.04	0.004	0.368	snake-like	C_sinebrachiatus	5		gameleira	33.7472	0.600237
scriptot13	duro	42	2	3	79	154.6	15.06	0.004	0.304	snake-like	S_catimbau	3		catimbau	33.7684	0.759034
calyptovaca5	areia	42	1	4	91	188.8	16.04	0.004	0.348	snake-like	C_nicterus	5		vacaria	33.8235	0.720194
scriptot18rlongo	duro	42	1	20	85	132.5	15.06	0.004	0.26	snake-like	S_catimbau	10		catimbau	33.839	0.948122
scriptomedio	duro	22	2	7	112	214.5	15.06	0.004	0.42	snake-like	S_catimbau	1	mov lat	catimbau	33.912	0.938129
notoal12	duro	32	1	8	88	163.2	15	0.004	0.32	snake-like	N_ablephara	4		alagoado	34	0.511504
calyptopv2	duro	42	1	44	121	168	16.04	0.004	0.308	snake-like	C_sinebrachiatus	5		pedra vermelha	34.0059	0.930349
scriptogrande	duro	22	2	10	115	215.5	15.06	0.004	0.42	snake-like	S_catimbau	1	mov lat	catimbau	34.0701	0.706627
leioal21	areia	22	1	5	112	218.8	15	0.004	0.428	snake-like	C_leiolepis	6		alagoado	34.081	0.744875
scriptopeq	areia	27	1	6	78	148.4	15.06	0.004	0.288	snake-like	S_catimbau	6		catimbau	34.215	0.653218
notoal12	areia	32	2	10	88	160.2	15	0.004	0.312	snake-like	N_ablephara	4		alagoado	34.2308	0.663766
leioal7	areia	37	1	22	103	166.4	15	0.004	0.324	snake-like	C_leiolepis	5		alagoado	34.2387	1
calyptovaca4	areia	22	1	18	69	112.3	16.04	0.004	0.204	snake-like	C_nicterus	4		vacaria	34.3198	0.32023
scriptot17peq	areia	32	1	3	68	134.6	15.06	0.004	0.26	snake-like	S_catimbau	7		catimbau	34.3753	0.903664
scriptot18rlongo	duro	37	1	6	73	138.8	15.06	0.004	0.268	snake-like	S_catimbau	9		catimbau	34.3898	0.963554
proery8	areia	22	1	52	121	142.4	15	0.004	0.276	lacertoid	P_erythrocercus	7		alagoado	34.3961	0.578742
scriptot18regcomp	areia	42	1	12	78	136.9	15.06	0.004	0.264	snake-like	S_catimbau	10		catimbau	34.433	0.681943
notoal14	duro	37	1	1	72	147.2	15	0.004	0.284	snake-like	N_ablephara	9		alagoado	34.554	0.657674
scriptot17peq	areia	37	1	0	54	112.7	15.06	0.004	0.216	snake-like	S_catimbau	9		catimbau	34.6454	0.910763
leioal9	areia	32	3	0	98	204.4	15	0.004	0.392	snake-like	C_leiolepis	1		alagoado	34.7619	0.914102
scriptot19	areia	37	2	69	126	119.4	15.06	0.004	0.228	snake-like	S_catimbau	9		catimbau	34.7732	1
leioal21	duro	27	3	14	110	200.3	15	0.004	0.384	snake-like	C_leiolepis	8		alagoado	34.7743	0.697917
proery7	areia	22	1	35	105	146.2	15	0.004	0.28	lacertoid	P_erythrocercus	7		alagoado	34.8095	0.312393
notoal6prima	duro	37	1	8	54	96.4	15	0.004	0.184	snake-like	N_ablephara	5		alagoado	34.9275	0.754623
vanzovacafil	areia	22	1	16	86	157.4	16.04	0.004	0.28	lacertoid	V_rubricauda	4		vacaria	35.0463	0.423788
scriptot18	areia	42	2	32	100	143.6	15.06	0.004	0.272	snake-like	S_catimbau	10		catimbau	35.0559	1
micraotiliapeq	areia	32	2	43	117	156.7	15.06	0.004	0.296	lacertoid	M_maximiliani	7		catimbau	35.1522	0.466749
notoal12mais	areia	32	2	15	119	219.6	15	0.004	0.416	snake-like	N_ablephara	4		alagoado	35.1923	0.748616
scriptot20cfina	duro	37	1	9	83	157.1	15.06	0.004	0.296	snake-like	S_catimbau	9		catimbau	35.2419	1
calyptopv6	duro	37	2	11	68	129.3	16.04	0.004	0.228	snake-like	C_sinebrachiatus	7		pedra vermelha	35.3557	0.6874
leioal21	areia	27	2	12	113	214.5	15	0.004	0.404	snake-like	C_leiolepis	8		alagoado	35.396	0.773617
calyptovaca8	areia	37	2	5	86	184.1	16.04	0.004	0.324	snake-like	C_nicterus	7		vacaria	35.4246	0.607711
calyptovaca11	areia	42	2	2	102	227.5	16.04	0.004	0.4	snake-like	C_nicterus	5		vacaria	35.4582	1
calyptobrit2	areia	42	1	8	79	162.2	16.04	0.004	0.284	snake-like	C_sinebrachiatus	5		pedra vermelha	35.6064	0.818437
calyptovaca5	duro	37	1	47	137	205.8	16.04	0.004	0.36	snake-like	C_nicterus	3		vacaria	35.6401	0.509018
proery8	duro	22	2	33	111	167	15	0.004	0.312	lacertoid	P_erythrocercus	7		alagoado	35.6838	0.337557
scriptot18rlongo	duro	27	2	8	98	193.5	15.06	0.004	0.36	snake-like	S_catimbau	15		catimbau	35.6906	1
scriptogrande	areia	22	2	14	110	206.5	15.06	0.004	0.384	snake-like	S_catimbau	1		catimbau	35.7079	0.63342
scriptot20cgorda	duro	32	2	36	114	167.8	15.06	0.004	0.312	snake-like	S_catimbau	16		catimbau	35.7119	0.600522
scriptot18rlongo	areia	27	2	16	104	189.6	15.06	0.004	0.352	snake-like	S_catimbau	15		catimbau	35.766	0.846667
vanzolist	areia	22	2	54	135	174.9	15.06	0.004	0.324	lacertoid	V_rubricauda	1		catimbau	35.8443	0.264565
calyptopv5	areia	22	2	16	92	174.8	16.04	0.004	0.304	snake-like	C_sinebrachiatus	4		pedra vermelha	35.8479	0.729194
calyptovaca6	duro	37	2	6	71	149.5	16.04	0.004	0.26	snake-like	C_nicterus	3		vacaria	35.8479	0.981707
scriptot17	areia	22	1	9	82	157.9	15.06	0.004	0.292	snake-like	S_catimbau	8		catimbau	35.9066	0.777554
scriptot17	areia	32	1	9	82	157.9	15.06	0.004	0.292	snake-like	S_catimbau	7		catimbau	35.9066	0.777554
calyptovaca5	areia	37	1	4	78	170.5	16.04	0.004	0.296	snake-like	C_nicterus	3		vacaria	35.9111	0.764645
scriptomedio	duro	37	2	11	69	126.3	15.06	0.004	0.232	snake-like	S_catimbau	2		catimbau	36.1485	1
proery8	areia	42	2	12	70	126.1	15.028	0.004	0.232	lacertoid	P_erythrocercus	8		alagoado	36.1681	0.608557
gampsi1	duro	22	2	4	86	190.4	16.04	0.004	0.328	lacertoid	P_paeminosus	10		gameleira	36.19	0.3706
notoal7	duro	32	1	7	78	154.6	15	0.004	0.284	snake-like	N_ablephara	4		alagoado	36.2911	0.753324
scriptot18rlongo	areia	37	1	0	67	146.5	15.06	0.004	0.268	snake-like	S_catimbau	9	mov lat	catimbau	36.2976	0.859251
scriptot19mancha	duro	37	2	7	66	129.2	15.06	0.004	0.236	snake-like	S_catimbau	9		catimbau	36.3518	1
calyptopv6	areia	42	2	3	73	163.5	16.04	0.004	0.28	snake-like	C_sinebrachiatus	5		pedra vermelha	36.4045	1
scriptomedio	areia	32	2	9	79	153.8	15.06	0.004	0.28	snake-like	S_catimbau	7		catimbau	36.4732	0.696065
proteal11	areia	32	1	20	102	179.6	15	0.004	0.328	lacertoid	P_tetradactylus	1		alagoado	36.5041	0.495394
calyptovaca6	duro	22	2	6	69	147.6	16.04	0.004	0.252	snake-like	C_nicterus	4		vacaria	36.5159	1
calyptopv2	duro	37	2	5	67	145.4	16.04	0.004	0.248	snake-like	C_sinebrachiatus	7		pedra vermelha	36.5518	1
scriptot20cgorda	areia	32	2	6	89	183.1	15.06	0.004	0.332	snake-like	S_catimbau	16		catimbau	36.6206	0.625822
scriptopeq	areia	32	1	33	85	114.8	15.06	0.004	0.208	snake-like	S_catimbau	7		catimbau	36.6483	0.699673
vanzovacamedio	areia	22	1	23	116	219	16.04	0.004	0.372	lacertoid	V_rubricauda	4		vacaria	36.7026	0.385162
calyptovaca2	areia	22	1	2	70	160.2	16.04	0.004	0.272	snake-like	C_nicterus	4		vacaria	36.7189	0.787519
vanzonegro	areia	32	2	53	121	150.7	15.06	0.004	0.272	lacertoid	V_rubricauda	7		catimbau	36.7891	0.444658
calyptovaca3	areia	27	1	9	103	222.9	16.04	0.004	0.376	snake-like	C_nicterus	1		vacaria	36.9588	0.318292
calyptovaca6	areia	37	1	13	97	199.5	16.04	0.004	0.336	snake-like	C_nicterus	7		vacaria	37.0168	0.805696
notoal6prima	duro	27	2	4	94	199.9	15	0.004	0.36	snake-like	N_ablephara	8		alagoado	37.0185	0.7998
leioal8	areia	32	1	5	104	220	15	0.004	0.396	snake-like	C_leiolepis	4		alagoado	37.037	0.638696
micrat7grande	duro	32	1	32	111	176.6	15.06	0.004	0.316	lacertoid	M_maximiliani	7	s¾ correram uma vez	catimbau	37.1089	0.379246
scriptot18	duro	32	2	36	100	143.1	15.06	0.004	0.256	snake-like	S_catimbau	7		catimbau	37.1172	0.886706
vanzodana2fil	duro	42	2	16	54	90.87	16.04	0.004	0.152	lacertoid	V_rubricauda	5		vacaria	37.2711	1
scriptot13	duro	37	2	10	77	151.1	15.06	0.004	0.268	snake-like	S_catimbau	2	mov lat	catimbau	37.4373	1
calyptomg3	duro	37	2	2	78	183.4	16.04	0.004	0.304	snake-like	C_sinebrachiatus	3		gameleira	37.6116	1
vanzodana418	areia	22	2	11	111	241.8	16.04	0.004	0.4	lacertoid	V_rubricauda	4		vacaria	37.687	0.4533
calyptovaca9	duro	37	1	91	168	186.2	16.04	0.004	0.308	snake-like	C_nicterus	7		vacaria	37.6899	0.573679
scriptot19mancha	areia	37	2	2	70	154.5	15.06	0.004	0.272	snake-like	S_catimbau	9		catimbau	37.7168	0.922572
leioal10	areia	42	1	26	102	172.5	15	0.004	0.304	snake-like	C_leiolepis	8		alagoado	37.8289	1
calyptovaca11	duro	37	1	8	72	155.5	16.04	0.004	0.256	snake-like	C_nicterus	7		vacaria	37.8692	1
notoal14	duro	32	1	9	85	172.9	15	0.004	0.304	snake-like	N_ablephara	4		alagoado	37.9167	0.721677
vanzodana410	areia	22	1	0	97	236.2	16.04	0.004	0.388	lacertoid	V_rubricauda	4		vacaria	37.9528	0.545066
leioal9	areia	42	1	14	96	187.1	15	0.004	0.328	snake-like	C_leiolepis	3		alagoado	38.0285	1
scriptot17peq	areia	42	2	4	63	135.2	15.06	0.004	0.236	snake-like	S_catimbau	3		catimbau	38.0399	1
notoal10	areia	37	2	10	79	157.5	15	0.004	0.276	snake-like	N_ablephara	5		alagoado	38.0435	0.606673
notoal10	areia	32	1	42	132	205.7	15	0.004	0.36	snake-like	N_ablephara	4		alagoado	38.0926	0.607457
proteal25	areia	22	2	19	100	185.3	15	0.004	0.324	lacertoid	P_tetradactylus	6		alagoado	38.1276	0.485171
calyptovaca7	duro	22	2	10	85	183.6	16.04	0.004	0.3	snake-like	C_nicterus	4		vacaria	38.1546	0.963499
calyptopv7	duro	37	1	10	73	154.5	16.04	0.004	0.252	snake-like	C_sinebrachiatus	7		pedra vermelha	38.2229	1
calyptomg1	duro	37	1	0	87	213.4	16.04	0.004	0.348	snake-like	C_sinebrachiatus	3		gameleira	38.2306	0.485958
scriptopeq	duro	37	1	3	58	126.8	15.06	0.004	0.22	snake-like	S_catimbau	2	mov lat	catimbau	38.2712	1
vanzovacagrande	areia	22	1	2	77	184.8	16.04	0.004	0.3	lacertoid	V_rubricauda	4		vacaria	38.404	0.475121
calyptovaca3	areia	42	1	11	94	204.6	16.04	0.004	0.332	snake-like	C_nicterus	5		vacaria	38.4205	0.330881
calyptovaca7	areia	42	1	81	154	180.6	16.04	0.004	0.292	snake-like	C_nicterus	5		vacaria	38.5594	0.892941
calyptovaca3	duro	32	1	7	58	126.5	16.04	0.004	0.204	snake-like	C_nicterus	2		vacaria	38.6595	1
calyptovaca1	areia	42	2	9	58	121.8	16.04	0.004	0.196	snake-like	C_nicterus	5		vacaria	38.7424	0.591334
notoal12mais	areia	37	2	2	81	184	15	0.004	0.316	snake-like	N_ablephara	5		alagoado	38.8186	0.825755
notoal6prima	areia	37	2	18	61	100.2	15	0.004	0.172	snake-like	N_ablephara	5		alagoado	38.8372	0.757475
calyptovaca9	areia	22	1	0	90	224.3	16.04	0.004	0.36	snake-like	C_nicterus	4		vacaria	38.8439	0.855425
proteal22	duro	27	2	4	69	151.6	15	0.004	0.26	lacertoid	P_tetradactylus	8		alagoado	38.8718	0.476444
notopi2	areia	37	1	1	77	179.8	15	0.004	0.304	snake-like	N_ablephara	5		alagoado	39.4298	0.843393
calyptopv7	areia	42	1	11	72	154.6	16.04	0.004	0.244	snake-like	C_sinebrachiatus	5		pedra vermelha	39.5017	0.95041
calyptovaca7	areia	22	2	13	113	253.9	16.04	0.004	0.4	snake-like	C_nicterus	4		vacaria	39.5729	0.916412
calyptovaca7	duro	37	1	0	81	205.8	16.04	0.004	0.324	snake-like	C_nicterus	3		vacaria	39.6001	1
calyptovaca9	duro	42	1	1	86	216	16.04	0.004	0.34	snake-like	C_nicterus	5		vacaria	39.6069	0.602858
leioal10	duro	32	2	3	93	214.1	15	0.004	0.36	snake-like	C_leiolepis	4		alagoado	39.6481	1
scriptot17peq	duro	42	2	3	63	143.4	15.06	0.004	0.24	snake-like	S_catimbau	3		catimbau	39.6746	0.947875
notoal12	areia	37	1	19	86	161.1	15	0.004	0.268	snake-like	N_ablephara	5		alagoado	40.0746	0.777084
notoal12	areia	37	2	19	86	161.1	15	0.004	0.268	snake-like	N_ablephara	5		alagoado	40.0746	0.777084
notoal13	duro	37	1	0	72	174.5	15	0.004	0.288	snake-like	N_ablephara	9		alagoado	40.3935	0.937854
leioal8	areia	37	1	11	91	195	15	0.004	0.32	snake-like	C_leiolepis	5		alagoado	40.625	0.70057
leioal6	duro	32	1	0	69	168.4	15	0.004	0.276	snake-like	C_leiolepis	4		alagoado	40.6763	0.695416
leioal5	areia	37	1	0	67	163.8	15	0.004	0.268	snake-like	C_leiolepis	5		alagoado	40.7463	0.970596
leioal5	areia	42	1	0	67	163.8	15	0.004	0.268	snake-like	C_leiolepis	3		alagoado	40.7463	0.970596
calyptovaca1	duro	22	1	10	68	151.7	16.04	0.004	0.232	snake-like	C_nicterus	4		vacaria	40.7655	0.695806
scriptot19mancha	areia	42	2	0	51	125.6	15.06	0.004	0.204	snake-like	S_catimbau	10		catimbau	40.8822	1
scriptot18regcomp	duro	32	1	17	84	165.1	15.06	0.004	0.268	snake-like	S_catimbau	7		catimbau	40.906	0.99577
scriptot18regcomp	duro	37	2	9	80	175.7	15.06	0.004	0.284	snake-like	S_catimbau	9		catimbau	41.0798	1
vanzopv1	duro	22	2	5	92	229.4	16.04	0.004	0.348	lacertoid	V_rubricauda	10		vacaria	41.097	0.277922
calyptobrit2	areia	22	1	3	67	169.2	16.04	0.004	0.256	snake-like	C_sinebrachiatus	4		pedra vermelha	41.2056	0.947138
scriptot17	duro	37	2	93	135	104.6	15.06	0.004	0.168	snake-like	S_catimbau	2	pulo, <3pasos	catimbau	41.3426	0.994235
proery6	duro	22	1	50	124	184.7	15.028	0.004	0.296	lacertoid	P_erythrocercus	11		alagoado	41.5216	0.419487
calyptopv7	areia	37	1	1	61	160	16.04	0.004	0.24	snake-like	C_sinebrachiatus	7		pedra vermelha	41.5628	1
calyptovaca6	areia	22	2	9	76	178.7	16.04	0.004	0.268	snake-like	C_nicterus	4		vacaria	41.5705	0.90481
scriptot17	duro	42	1	10	71	152.8	15.06	0.004	0.244	snake-like	S_catimbau	3		catimbau	41.5823	1
calyptopv1	areia	42	1	6	57	136.1	16.04	0.004	0.204	snake-like	C_sinebrachiatus	5		pedra vermelha	41.5933	0.593723
vanzovacavul1	areia	22	2	0	89	238	16.04	0.004	0.356	lacertoid	V_rubricauda	4		vacaria	41.6795	0.478707
calyptomg3	areia	22	1	0	69	185.1	16.04	0.004	0.276	snake-like	C_sinebrachiatus	4		gameleira	41.8112	0.743667
scriptot17peq	duro	37	1	9	65	141.2	15.06	0.004	0.224	snake-like	S_catimbau	9		catimbau	41.8564	1
scriptot18	duro	37	2	10	84	186.6	15.06	0.004	0.296	snake-like	S_catimbau	9	mov lat	catimbau	41.8596	1
vanzodana415	areia	22	1	10	92	220.7	16.04	0.004	0.328	lacertoid	V_rubricauda	4		vacaria	41.9492	0.464847
leioal5	areia	32	2	5	74	173.8	15	0.004	0.276	snake-like	C_leiolepis	4		alagoado	41.9807	1
scriptot13	areia	37	2	7	68	154.3	15.06	0.004	0.244	snake-like	S_catimbau	2		catimbau	41.9905	0.28445
gampsi19	areia	22	2	9	61	140.3	16.04	0.004	0.208	lacertoid	P_paeminosus	4		gameleira	42.0523	0.605236
scriptot17	areia	42	2	22	87	164.8	15.06	0.004	0.26	snake-like	S_catimbau	3		catimbau	42.0881	0.911413
notoal13	areia	32	1	9	60	129.2	15	0.004	0.204	snake-like	N_ablephara	4		alagoado	42.2222	0.81027
scriptot18rlongo	areia	42	2	17	93	193.4	15.06	0.004	0.304	snake-like	S_catimbau	10		catimbau	42.2433	1
proery6	areia	42	1	23	76	135.2	15.028	0.004	0.212	lacertoid	P_erythrocercus	8		alagoado	42.4365	0.721479
calyptovaca1	areia	22	1	0	55	150.2	16.04	0.004	0.22	snake-like	C_nicterus	4		vacaria	42.564	0.649664
proery6	areia	22	1	12	82	179.9	15.028	0.004	0.28	lacertoid	P_erythrocercus	11		alagoado	42.7535	0.726869
notoal10	duro	42	2	6	66	154.5	15	0.004	0.24	snake-like	N_ablephara	3		alagoado	42.9167	0.851546
calyptovaca5	duro	22	2	7	75	187.7	16.04	0.004	0.272	snake-like	C_nicterus	4		vacaria	43.022	0.614449
calyptovaca3	areia	22	2	12	93	223.6	16.04	0.004	0.324	snake-like	C_nicterus	4		vacaria	43.0252	0.370536
notoal13	duro	42	1	0	57	147.3	15	0.004	0.228	snake-like	N_ablephara	8		alagoado	43.0702	1
proteal9	areia	27	2	0	70	181.2	15	0.004	0.28	lacertoid	P_tetradactylus	8		alagoado	43.1429	0.501877
calyptovaca7	areia	37	1	7	75	188.4	16.04	0.004	0.272	snake-like	C_nicterus	3		vacaria	43.1825	1
calyptovaca3	areia	37	2	0	67	185.7	16.04	0.004	0.268	snake-like	C_nicterus	3		vacaria	43.1989	0.372032
scriptot20cfina	areia	37	1	3	68	169.3	15.06	0.004	0.26	snake-like	S_catimbau	9		catimbau	43.2373	0.704778
calyptobrit2	areia	32	1	3	72	192.6	16.04	0.004	0.276	snake-like	C_sinebrachiatus	2		pedra vermelha	43.5054	1
scriptot20cfina	areia	32	2	14	71	149.6	15.06	0.004	0.228	snake-like	S_catimbau	16		catimbau	43.5684	0.710175
leioal22	areia	37	2	8	81	191	15	0.004	0.292	snake-like	C_leiolepis	5		alagoado	43.6073	0.79648
scriptopeq	areia	42	2	14	68	141.9	15.06	0.004	0.216	snake-like	S_catimbau	3		catimbau	43.6218	0.832809
protealp2	areia	27	1	2	59	150.2	15	0.004	0.228	lacertoid	P_tetradactylus	8		alagoado	43.9181	0.475028
vanzovacagrande	duro	22	1	5	76	200.6	16.04	0.004	0.284	lacertoid	V_rubricauda	4		vacaria	44.036	0.505043
proteal11	duro	32	2	10	90	212	15	0.004	0.32	lacertoid	P_tetradactylus	1		alagoado	44.1667	0.410545
calyptovaca9	areia	42	2	4	75	202.4	16.04	0.004	0.284	snake-like	C_nicterus	5		vacaria	44.4312	0.978469
scriptot13	duro	37	1	4	64	160.8	15.06	0.004	0.24	snake-like	S_catimbau	2	com pulo, ficou mais rßpido (desconsiderar?)	catimbau	44.4887	1
notoal7	areia	32	2	1	75	198.6	15	0.004	0.296	snake-like	N_ablephara	4		alagoado	44.7297	0.764943
scriptot20cgorda	duro	27	1	8	85	208.3	15.06	0.004	0.308	snake-like	S_catimbau	15		catimbau	44.907	0.755145
leioal6	areia	32	1	6	88	221.1	15	0.004	0.328	snake-like	C_leiolepis	4		alagoado	44.939	0.888766
scriptogrande	areia	27	1	40	120	216.9	15.06	0.004	0.32	snake-like	S_catimbau	6		catimbau	45.0075	0.798385
proteal11	duro	22	2	8	35	73.12	15	0.004	0.108	lacertoid	P_tetradactylus	6		alagoado	45.1358	0.419553
proteal22	areia	32	1	40	92	141.1	15	0.004	0.208	lacertoid	P_tetradactylus	4		alagoado	45.2244	0.761673
calyptovaca9	areia	37	1	12	79	195.2	16.04	0.004	0.268	snake-like	C_nicterus	7		vacaria	45.4089	1
vanzovacavul1	duro	22	1	74	158	244.9	16.04	0.004	0.336	lacertoid	V_rubricauda	4		vacaria	45.4407	0.418254
vanzovacamedio	duro	22	1	30	106	221.7	16.04	0.004	0.304	lacertoid	V_rubricauda	4		vacaria	45.4661	0.438388
scriptot18regcomp	areia	37	1	3	59	153.6	15.06	0.004	0.224	snake-like	S_catimbau	9		catimbau	45.5322	0.901761
leioal6	areia	42	1	6	73	183.9	15	0.004	0.268	snake-like	C_leiolepis	3		alagoado	45.7463	0.904731
leioal21	areia	37	1	8	92	230.6	15	0.004	0.336	snake-like	C_leiolepis	5		alagoado	45.754	1
calyptopv5	areia	42	2	71	119	141	16.04	0.004	0.192	snake-like	C_sinebrachiatus	5		pedra vermelha	45.784	0.931308
proery5	areia	22	2	4	66	170.7	15.028	0.004	0.248	lacertoid	P_erythrocercus	11		alagoado	45.8016	0.341566
proery7	duro	22	2	34	95	168	15	0.004	0.244	lacertoid	P_erythrocercus	7		alagoado	45.9016	0.477434
leioal6	areia	37	2	0	82	225.9	15	0.004	0.328	snake-like	C_leiolepis	5		alagoado	45.9146	0.908061
calyptovaca6	areia	42	2	1	68	197.5	16.04	0.004	0.268	snake-like	C_nicterus	5		vacaria	45.9439	1
proteal18	areia	27	1	2	84	226.3	15	0.004	0.328	lacertoid	P_tetradactylus	2		alagoado	45.9959	0.499622
protealp2	duro	32	2	31	81	138.2	15	0.004	0.2	lacertoid	P_tetradactylus	4		alagoado	46.0667	0.445328
scriptot17	areia	37	2	0	66	183.6	15.06	0.004	0.264	snake-like	S_catimbau	2		catimbau	46.1789	1
notoal6prima	duro	42	1	0	48	133.3	15	0.004	0.192	snake-like	N_ablephara	8		alagoado	46.2847	1
vanzodana1_fil	areia	27	1	13	73	178.5	16.04	0.004	0.24	lacertoid	V_rubricauda	1	areia? nÒo consta do nome, confirmar.	vacaria	46.3685	1
vanzovacafil	areia	42	2	8	46	113.3	16.04	0.004	0.152	lacertoid	V_rubricauda	5		vacaria	46.471	0.561938
leioal5	duro	37	1	5	68	176	15	0.004	0.252	snake-like	C_leiolepis	5		alagoado	46.5608	1
leioal5	duro	42	1	5	68	176	15	0.004	0.252	snake-like	C_leiolepis	3		alagoado	46.5608	1
calyptovaca2	areia	32	2	4	63	176.5	16.04	0.004	0.236	snake-like	C_nicterus	2		vacaria	46.626	1
notopi2	areia	42	1	3	62	165.5	15	0.004	0.236	snake-like	N_ablephara	3		alagoado	46.7514	1
vanzosemilist	areia	42	1	1	38	104.4	15.06	0.004	0.148	lacertoid	V_rubricauda	3		catimbau	46.8397	0.798572
calyptovaca5	areia	32	2	0	68	204.9	16.04	0.004	0.272	snake-like	C_nicterus	2		vacaria	46.9644	1
notoal12mais	areia	42	2	14	82	191.8	15	0.004	0.272	snake-like	N_ablephara	3		alagoado	47.0098	1
notoal7	duro	42	1	5	59	152.4	15	0.004	0.216	snake-like	N_ablephara	3		alagoado	47.037	0.976387
notoal3	duro	37	1	7	61	152.9	15	0.004	0.216	snake-like	N_ablephara	5		alagoado	47.1914	0.838105
scriptomedio	areia	37	1	8	70	176.4	15.06	0.004	0.248	snake-like	S_catimbau	2		catimbau	47.2304	0.90136
micrat11peqreg	areia	42	2	2	43	116.7	15.06	0.004	0.164	lacertoid	M_maximiliani	3		catimbau	47.25	0.635939
scriptomedio	duro	42	1	1	55	153.9	15.06	0.004	0.216	snake-like	S_catimbau	3		catimbau	47.3108	1
leioal20	areia	37	1	7	70	179.3	15	0.004	0.252	snake-like	C_leiolepis	5		alagoado	47.4339	1
leioal20	areia	42	1	7	70	179.3	15	0.004	0.252	snake-like	C_leiolepis	3		alagoado	47.4339	1
leioal13	areia	37	1	8	66	166.4	15	0.004	0.232	snake-like	C_leiolepis	9		alagoado	47.8161	1
calyptovaca8	areia	22	1	10	76	203.2	16.04	0.004	0.264	snake-like	C_nicterus	4		vacaria	47.9861	0.823205
notoal7	duro	37	1	2	65	182.1	15	0.004	0.252	snake-like	N_ablephara	5		alagoado	48.1746	1
scriptogrande	duro	37	2	22	89	194.6	15.06	0.004	0.268	snake-like	S_catimbau	2	mov lat	catimbau	48.2151	1
notoal14	areia	32	1	7	78	206.1	15	0.004	0.284	snake-like	N_ablephara	4		alagoado	48.3803	0.863837
gampsi16	areia	42	1	10	52	130.4	16.04	0.004	0.168	lacertoid	P_paeminosus	5		gameleira	48.3909	0.660295
gampsi22	areia	37	2	21	67	142.9	16.04	0.004	0.184	lacertoid	P_paeminosus	7		gameleira	48.4184	0.647674
proteal25	duro	22	1	24	94	203.6	15	0.004	0.28	lacertoid	P_tetradactylus	6		alagoado	48.4762	0.337813
calyptopv2	duro	22	1	3	51	149.3	16.04	0.004	0.192	snake-like	C_sinebrachiatus	4		pedra vermelha	48.4791	1
protealp2	areia	37	3	5	47	122.3	15	0.004	0.168	lacertoid	P_tetradactylus	9		alagoado	48.5317	0.52493
calyptopv1	duro	22	2	0	46	143.3	16.04	0.004	0.184	snake-like	C_sinebrachiatus	4		pedra vermelha	48.5539	1
calyptopv4	areia	22	2	3	61	181.4	16.04	0.004	0.232	snake-like	C_sinebrachiatus	4		pedra vermelha	48.7467	1
proteal11	areia	22	2	10	59	143.8	15	0.004	0.196	lacertoid	P_tetradactylus	6		alagoado	48.9116	0.663776
calyptopv5	duro	22	1	6	57	160.6	16.04	0.004	0.204	snake-like	C_sinebrachiatus	4		pedra vermelha	49.0807	0.985955
calyptopv5	areia	37	1	31	79	151.4	16.04	0.004	0.192	snake-like	C_sinebrachiatus	7		pedra vermelha	49.161	1
proery9	areia	27	1	8	72	189.3	15	0.004	0.256	lacertoid	P_erythrocercus	1		alagoado	49.2969	0.770115
scriptot20cgorda	areia	37	1	27	88	181.2	15.06	0.004	0.244	snake-like	S_catimbau	9	mov lat	catimbau	49.311	0.842693
vanzodana418	duro	22	2	32	115	262.6	16.04	0.004	0.332	lacertoid	V_rubricauda	4		vacaria	49.312	0.584587
vanzoextra	areia	22	1	15	86	211.5	15.06	0.004	0.284	lacertoid	V_rubricauda	8		catimbau	49.4501	0.511834
vanzopv2	areia	32	1	27	76	155.8	16.04	0.004	0.196	lacertoid	V_rubricauda	9		pedra vermelha	49.5572	0.58733
scriptogrande	areia	32	1	3	64	182.2	15.06	0.004	0.244	snake-like	S_catimbau	7		catimbau	49.5831	0.879552
calyptopv5	duro	42	2	10	59	156.5	16.04	0.004	0.196	snake-like	C_sinebrachiatus	5		pedra vermelha	49.7799	1
leioal21	duro	32	1	1	68	200.3	15	0.004	0.268	snake-like	C_leiolepis	4		alagoado	49.8259	1
leioal20	duro	37	2	59	387	117.6	15	0.004	1.312	snake-like	C_leiolepis	5		alagoado	5.97561	0.189212
vanzodana410	duro	22	1	3	83	257.1	16.04	0.004	0.32	lacertoid	V_rubricauda	4		vacaria	50.0896	0.864458
micrat20rcomp	areia	22	1	38	102	193.6	15.06	0.004	0.256	lacertoid	M_maximiliani	8		catimbau	50.2158	0.60743
proteal1	duro	27	1	76	139	190.1	15	0.004	0.252	lacertoid	P_tetradactylus	2		alagoado	50.291	0.417802
notoal10	duro	37	1	3	49	139.1	15	0.004	0.184	snake-like	N_ablephara	5		alagoado	50.3986	1
vanzodana415	duro	22	2	11	81	226.6	16.04	0.004	0.28	lacertoid	V_rubricauda	4		vacaria	50.4542	0.415907
scriptot18regcomp	areia	32	1	9	69	182.5	15.06	0.004	0.24	snake-like	S_catimbau	7		catimbau	50.4925	1
calyptopv1	areia	37	2	6	59	171.8	16.04	0.004	0.212	snake-like	C_sinebrachiatus	3		pedra vermelha	50.5223	0.721179
protealp2	duro	27	1	22	82	181.9	15	0.004	0.24	lacertoid	P_tetradactylus	8		alagoado	50.5278	0.488453
leioal6	areia	27	3	40	111	215.4	15	0.004	0.284	snake-like	C_leiolepis	8		alagoado	50.5634	1
vanzodana2semi	duro	22	2	7	84	249.8	16.04	0.004	0.308	lacertoid	V_rubricauda	4		vacaria	50.5635	0.458172
vanzovacafil	duro	22	1	4	77	236.9	16.04	0.004	0.292	lacertoid	V_rubricauda	4		vacaria	50.5799	0.571004
gampsi13	areia	37	2	3	44	133.3	16.04	0.004	0.164	lacertoid	P_paeminosus	7		gameleira	50.6736	0.773661
vanzodana2semi	duro	42	2	2	52	163.2	16.04	0.004	0.2	lacertoid	V_rubricauda	5		vacaria	50.8728	0.460975
proteal18	duro	37	1	2	78	232.8	15	0.004	0.304	lacertoid	P_tetradactylus	5		alagoado	51.0526	0.663684
psiloina	areia	22	2	0	51	167.6	16.04	0.004	0.204	lacertoid	P_paeminosus	4		pedra vermelha	51.22	0.342098
proery3	areia	22	1	11	67	172.1	15	0.004	0.224	lacertoid	P_erythrocercus	7		alagoado	51.2202	0.53015
notoal6prima	areia	42	1	1	39	116.9	15	0.004	0.152	snake-like	N_ablephara	8		alagoado	51.2719	1
vanzodana1_medio	areia	27	1	21	84	207.7	16.04	0.004	0.252	lacertoid	V_rubricauda	1		vacaria	51.3844	1
proery9	areia	22	2	8	85	237.6	15	0.004	0.308	lacertoid	P_erythrocercus	3		alagoado	51.4286	0.803416
calyptopv6	duro	42	1	15	70	181.5	16.04	0.004	0.22	snake-like	C_sinebrachiatus	5		pedra vermelha	51.4339	1
proteal18	duro	32	2	81	130	151.6	15	0.004	0.196	lacertoid	P_tetradactylus	4		alagoado	51.5646	0.67034
notoal12	areia	42	1	9	61	160.9	15	0.004	0.208	snake-like	N_ablephara	3		alagoado	51.5705	1
micrat11peqreg	duro	42	2	9	61	161.8	15.06	0.004	0.208	lacertoid	M_maximiliani	3		catimbau	51.6524	0.586345
calyptomg3	duro	32	1	3	44	136.3	16.04	0.004	0.164	snake-like	C_sinebrachiatus	2		gameleira	51.8141	1
vanzodana418	areia	32	2	4	49	149.9	16.04	0.004	0.18	lacertoid	V_rubricauda	9		vacaria	51.9188	0.624481
vanzot17semilist	areia	22	1	12	81	216	15.06	0.004	0.276	lacertoid	V_rubricauda	8		catimbau	51.966	0.620637
gampsi13	areia	22	2	2	60	193.6	16.04	0.004	0.232	lacertoid	P_paeminosus	4		gameleira	52.0251	0.794295
notoal13	areia	42	1	7	56	153.2	15	0.004	0.196	snake-like	N_ablephara	8		alagoado	52.1088	1
gampsi22	areia	32	1	21	58	123.9	16.04	0.004	0.148	lacertoid	P_paeminosus	9		gameleira	52.1922	0.698155
scriptopeq	areia	37	1	4	51	148.3	15.06	0.004	0.188	snake-like	S_catimbau	2	mov lat	catimbau	52.3791	1
scriptomedio	areia	42	1	6	52	145.2	15.06	0.004	0.184	snake-like	S_catimbau	3		catimbau	52.3991	1
proery8	areia	37	1	0	40	126.1	15.028	0.004	0.16	lacertoid	P_erythrocercus	4		alagoado	52.4438	0.882407
proteal1	duro	37	1	67	127	188.8	15	0.004	0.24	lacertoid	P_tetradactylus	5		alagoado	52.4444	0.435692
notoal14	duro	42	2	2	44	132.4	15	0.004	0.168	snake-like	N_ablephara	8		alagoado	52.5397	1
proery5	duro	22	2	10	79	218.4	15.028	0.004	0.276	lacertoid	P_erythrocercus	11		alagoado	52.6553	0.383663
vanzoextra	duro	22	1	7	82	237.9	15.06	0.004	0.3	lacertoid	V_rubricauda	8		catimbau	52.656	0.445795
proteal18	duro	27	1	2	79	243.8	15	0.004	0.308	lacertoid	P_tetradactylus	2		alagoado	52.7706	0.686017
protealp2	duro	22	2	9	70	193.4	15	0.004	0.244	lacertoid	P_tetradactylus	6		alagoado	52.8415	0.51082
vanzosemilist	areia	22	1	5	74	220.2	15.06	0.004	0.276	lacertoid	V_rubricauda	1		catimbau	52.9765	0.903199
notoal14	areia	42	1	8	49	132.1	15	0.004	0.164	snake-like	N_ablephara	8		alagoado	53.6992	0.958806
notoal3	areia	42	1	1	49	154.7	15	0.004	0.192	snake-like	N_ablephara	8		alagoado	53.7153	0.857159
vanzonegro	duro	42	1	28	82	174.9	15.06	0.004	0.216	lacertoid	V_rubricauda	10		catimbau	53.7664	0.464312
micraotiliapeq	areia	22	1	19	87	220.4	15.06	0.004	0.272	lacertoid	M_maximiliani	8		catimbau	53.8044	0.714412
vanzonegro	areia	37	1	16	61	146.1	15.06	0.004	0.18	lacertoid	V_rubricauda	9		catimbau	53.8955	0.651418
vanzodana2fil	areia	42	2	24	53	100.7	16.04	0.004	0.116	lacertoid	V_rubricauda	5		vacaria	54.1212	1
protealp2	areia	22	1	21	85	207.9	15	0.004	0.256	lacertoid	P_tetradactylus	6		alagoado	54.1406	0.585597
micragrandeotilia	duro	42	1	7	75	222.7	15.06	0.004	0.272	lacertoid	M_maximiliani	3		catimbau	54.3659	0.524646
leioal22	areia	42	1	0	60	197.1	15	0.004	0.24	snake-like	C_leiolepis	8		alagoado	54.75	1
scriptogrande	areia	37	1	12	79	221.8	15.06	0.004	0.268	snake-like	S_catimbau	2		catimbau	54.9543	0.974831
proteal18	duro	22	1	54	95	135.5	15	0.004	0.164	lacertoid	P_tetradactylus	6		alagoado	55.0813	0.716057
proteal19	duro	32	2	14	66	172.2	15	0.004	0.208	lacertoid	P_tetradactylus	4		alagoado	55.1923	0.567822
calyptomg2	areia	32	2	10	66	198.7	16.04	0.004	0.224	snake-like	C_sinebrachiatus	2		gameleira	55.3026	1
notoal7	areia	42	2	2	50	160	15	0.004	0.192	snake-like	N_ablephara	3		alagoado	55.5556	0.950081
gampsi23prima	areia	37	1	8	45	132.2	16.04	0.004	0.148	lacertoid	P_paeminosus	7		gameleira	55.6885	1
vanzosemilist	duro	22	1	6	79	244.9	15.06	0.004	0.292	lacertoid	V_rubricauda	1		catimbau	55.6905	0.536629
vanzodana415	areia	32	2	32	73	146.8	16.04	0.004	0.164	lacertoid	V_rubricauda	9		vacaria	55.8056	0.618392
micrat11rcomp	duro	22	1	0	80	269.7	15.06	0.004	0.32	lacertoid	M_maximiliani	8		catimbau	55.9636	0.725867
notoal14	areia	37	1	18	71	178.1	15	0.004	0.212	snake-like	N_ablephara	9		alagoado	56.0063	1
gampsi16	duro	42	2	26	68	151.5	16.04	0.004	0.168	lacertoid	P_paeminosus	5		gameleira	56.2211	0.669928
calyptomg3	areia	32	2	3	58	198.4	16.04	0.004	0.22	snake-like	C_sinebrachiatus	2		gameleira	56.2231	1
gampsi19	areia	42	2	2	39	133.6	16.04	0.004	0.148	lacertoid	P_paeminosus	5		gameleira	56.2782	0.809981
notoal3	duro	42	1	13	64	172.3	15	0.004	0.204	snake-like	N_ablephara	8		alagoado	56.3072	1
scriptogrande	areia	42	1	3	52	166.4	15.06	0.004	0.196	snake-like	S_catimbau	3		catimbau	56.3731	1
vanzodana418	duro	32	1	3	50	170.7	16.04	0.004	0.188	lacertoid	V_rubricauda	9		vacaria	56.6072	0.671071
proery6	areia	27	1	2	54	177.2	15	0.004	0.208	lacertoid	P_erythrocercus	5		alagoado	56.7949	0.965591
vanzolist	duro	22	2	71	143	246.6	15.06	0.004	0.288	lacertoid	V_rubricauda	1		catimbau	56.8559	0.459838
calyptobrit2	duro	22	2	8	68	219.15	16.04	0.004	0.24	snake-like	C_sinebrachiatus	4		pedra vermelha	56.928	0.776281
proery8	duro	27	2	12	63	174.4	15	0.004	0.204	lacertoid	P_erythrocercus	15		alagoado	56.9935	0.53914
proery9	areia	37	1	6	59	182.7	15.028	0.004	0.212	lacertoid	P_erythrocercus	5		alagoado	57.3458	0.895855
proery6	areia	32	1	13	66	183.5	15.028	0.004	0.212	lacertoid	P_erythrocercus	10		alagoado	57.5969	0.979226
proery8	areia	32	1	26	70	152.2	15	0.004	0.176	lacertoid	P_erythrocercus	5		alagoado	57.6515	0.970031
proery5	areia	27	2	18	70	179.9	15	0.004	0.208	lacertoid	P_erythrocercus	3		alagoado	57.6603	0.430002
proteal9	areia	22	2	2	49	163.1	15	0.004	0.188	lacertoid	P_tetradactylus	6		alagoado	57.8369	0.672812
vanzodana410	duro	42	1	52	103	189.6	16.04	0.004	0.204	lacertoid	V_rubricauda	5		vacaria	57.9434	1
leioal8	areia	42	1	3	61	201.8	15	0.004	0.232	snake-like	C_leiolepis	8		alagoado	57.9885	1
micrat11greg	areia	27	1	55	109	188.8	15.06	0.004	0.216	lacertoid	M_maximiliani	15		catimbau	58.0394	0.738795
gampsi23prima	duro	37	1	9	55	171.8	16.04	0.004	0.184	lacertoid	P_paeminosus	7		gameleira	58.2105	1
gampsi17	duro	22	1	11	67	209.4	16.04	0.004	0.224	lacertoid	P_paeminosus	4		gameleira	58.2806	0.41992
calyptovaca8	areia	42	1	32	92	224.4	16.04	0.004	0.24	snake-like	C_nicterus	5		vacaria	58.2918	1
vanzot17semilist	duro	22	2	16	88	253.3	15.06	0.004	0.288	lacertoid	V_rubricauda	8		catimbau	58.4007	0.463456
micrat11greg	duro	22	1	30	99	242.8	15.06	0.004	0.276	lacertoid	M_maximiliani	8		catimbau	58.4137	0.48097
notoal7	areia	37	2	1	60	207	15	0.004	0.236	snake-like	N_ablephara	5		alagoado	58.4746	1
leioal6	duro	42	2	49	112	221.1	15	0.004	0.252	snake-like	C_leiolepis	3		alagoado	58.4921	1
scriptot20cgorda	areia	42	1	6	54	169.2	15.06	0.004	0.192	snake-like	S_catimbau	10		catimbau	58.5159	1
calyptovaca4	duro	32	2	11	42	116.4	16.04	0.004	0.124	snake-like	C_nicterus	2		vacaria	58.523	1
calyptovaca1	duro	32	1	1	40	146.6	16.04	0.004	0.156	snake-like	C_nicterus	2		vacaria	58.5875	1
vanzosemilist	areia	37	1	30	63	116.6	15.06	0.004	0.132	lacertoid	V_rubricauda	2		catimbau	58.6543	1
proteal9	areia	37	2	64	114	176	15	0.004	0.2	lacertoid	P_tetradactylus	9		alagoado	58.6667	0.682464
proery6	areia	37	2	41	83	148.5	15.028	0.004	0.168	lacertoid	P_erythrocercus	4		alagoado	58.8188	1
micraotiliapeq	duro	42	1	10	58	170.1	15.06	0.004	0.192	lacertoid	M_maximiliani	3		catimbau	58.8272	0.762469
proteal19	areia	32	1	1	48	166	15	0.004	0.188	lacertoid	P_tetradactylus	4		alagoado	58.8652	0.837608
gampsi23prima	areia	42	1	29	60	117.5	16.04	0.004	0.124	lacertoid	P_paeminosus	5		gameleira	59.0761	0.637672
vanzovacagrande	areia	42	1	44	91	178.5	16.04	0.004	0.188	lacertoid	V_rubricauda	5		vacaria	59.1938	0.732325
proteal22	areia	42	2	6	46	142.5	15	0.004	0.16	lacertoid	P_tetradactylus	8		alagoado	59.375	1
proery6	duro	42	1	21	49	100	15.028	0.004	0.112	lacertoid	P_erythrocercus	8		alagoado	59.4129	0.60024
proery8	areia	27	1	4	51	167.6	15	0.004	0.188	lacertoid	P_erythrocercus	15		alagoado	59.4326	1
scriptot20cgorda	duro	37	1	8	76	243.6	15.06	0.004	0.272	snake-like	S_catimbau	9	mov lat	catimbau	59.468	1
proteal25	areia	32	2	8	62	192.7	15	0.004	0.216	lacertoid	P_tetradactylus	4		alagoado	59.4753	0.756819
proery9	duro	22	1	2	87	303.5	15	0.004	0.34	lacertoid	P_erythrocercus	3		alagoado	59.5098	0.577431
vanzot17semilist	areia	32	2	8	61	190.3	15.06	0.004	0.212	lacertoid	V_rubricauda	7		catimbau	59.6043	0.711863
micrat20rcomp	duro	22	1	25	88	226.4	15.06	0.004	0.252	lacertoid	M_maximiliani	8		catimbau	59.6556	0.496818
vanzopv2	duro	32	1	6	44	145.8	16.04	0.004	0.152	lacertoid	V_rubricauda	9		pedra vermelha	59.8012	0.67313
leioal6	duro	27	3	118	381	100.2	15	0.004	1.052	snake-like	C_leiolepis	8		alagoado	6.34981	0.108558
gampsi23prima	areia	22	2	9	60	196.8	16.04	0.004	0.204	lacertoid	P_paeminosus	4		gameleira	60.1438	0.649196
proteal25	duro	27	2	41	79	138.2	15	0.004	0.152	lacertoid	P_tetradactylus	8		alagoado	60.614	0.422397
micraotiliapeq	duro	22	1	11	78	245.1	15.06	0.004	0.268	lacertoid	M_maximiliani	8		catimbau	60.7272	0.787096
gampsi16	areia	22	2	5	51	180.4	16.04	0.004	0.184	lacertoid	P_paeminosus	4		gameleira	61.1244	0.834043
proery9	areia	42	1	45	93	176.4	15.028	0.004	0.192	lacertoid	P_erythrocercus	8		alagoado	61.1359	0.955064
scriptot20cfina	areia	42	2	33	79	170	15.06	0.004	0.184	snake-like	S_catimbau	10		catimbau	61.3488	1
vanzonegro	duro	22	1	17	94	285	15.06	0.004	0.308	lacertoid	V_rubricauda	8		catimbau	61.4425	0.530601
proteal11	duro	37	1	80	129	180.8	15	0.004	0.196	lacertoid	P_tetradactylus	5		alagoado	61.4966	0.571633
proteal11	areia	37	1	9	43	126.2	15	0.004	0.136	lacertoid	P_tetradactylus	5		alagoado	61.8627	0.839536
gampsi8	areia	42	1	8	47	154.8	16.04	0.004	0.156	lacertoid	P_paeminosus	5		gameleira	61.8646	0.770724
calyptomg2	duro	32	1	2	39	146.9	16.04	0.004	0.148	snake-like	C_sinebrachiatus	2		gameleira	61.8808	1
gampsi22	duro	32	1	24	69	178.8	16.04	0.004	0.18	lacertoid	P_paeminosus	9		gameleira	61.9285	0.879705
Proteal11	areia	27	2	3	58	204.5	15	0.004	0.22	lacertoid	P_tetradactylus	2		alagoado	61.9697	1
proteal19	duro	22	2	37	73	134	15	0.004	0.144	lacertoid	P_tetradactylus	6		alagoado	62.037	0.638241
micraotiliapeq	duro	32	1	8	66	217	15.06	0.004	0.232	lacertoid	M_maximiliani	7		catimbau	62.1079	0.804991
gampsi23	areia	22	2	5	51	183.4	16.04	0.004	0.184	lacertoid	P_paeminosus	4		gameleira	62.1408	0.682611
gampsi8	duro	32	1	11	53	167.5	16.04	0.004	0.168	lacertoid	P_paeminosus	9		gameleira	62.1586	0.705858
micrat11peqreg	areia	37	1	22	72	187.7	15.06	0.004	0.2	lacertoid	M_maximiliani	9		catimbau	62.3174	0.838732
notoal3	areia	37	2	4	64	225.6	15	0.004	0.24	snake-like	N_ablephara	5		alagoado	62.6667	1
gampsi13	areia	42	2	4	47	172.9	16.04	0.004	0.172	lacertoid	P_paeminosus	5		gameleira	62.6704	0.956822
notoal10	areia	42	1	6	46	150.5	15	0.004	0.16	snake-like	N_ablephara	3		alagoado	62.7083	1
proery3	duro	22	2	0	54	203.3	15	0.004	0.216	lacertoid	P_erythrocercus	7		alagoado	62.7469	0.530475
vanzot17semilist	areia	27	2	20	72	196.9	15.06	0.004	0.208	lacertoid	V_rubricauda	15		catimbau	62.8575	0.750716
gampsi14	areia	37	2	7	43	145.2	16.04	0.004	0.144	lacertoid	P_paeminosus	7		gameleira	62.8637	0.402151
micrat20reg	duro	22	1	12	72	228.1	15.06	0.004	0.24	lacertoid	M_maximiliani	8		catimbau	63.1087	0.530959
vanzolist	areia	27	2	11	63	198	15.06	0.004	0.208	lacertoid	V_rubricauda	6		catimbau	63.2087	0.466541
gampsi8	duro	37	2	29	74	183	16.04	0.004	0.18	lacertoid	P_paeminosus	7		gameleira	63.3832	0.719764
proteal18prima	duro	22	1	0	57	216.9	15	0.004	0.228	lacertoid	P_tetradactylus	6		alagoado	63.4211	0.542609
gampsi1	areia	32	1	0	37	150.9	16.04	0.004	0.148	lacertoid	P_paeminosus	9		gameleira	63.5657	1
proery9	areia	32	1	57	111	207.4	15	0.004	0.216	lacertoid	P_erythrocercus	7		alagoado	64.0123	1
proery4	areia	22	2	0	60	231	15	0.004	0.24	lacertoid	P_erythrocercus	7		alagoado	64.1667	0.484399
gampsi18	duro	27	1	10	60	206.6	16.04	0.004	0.2	lacertoid	P_paeminosus	1		gameleira	64.4015	1
proteal9	duro	37	1	19	62	166.4	15	0.004	0.172	lacertoid	P_tetradactylus	9		alagoado	64.4961	0.709364
proteal19	areia	42	1	48	92	170.8	15	0.004	0.176	lacertoid	P_tetradactylus	3		alagoado	64.697	0.920589
psiloina	areia	37	2	4	36	133.4	16.04	0.004	0.128	lacertoid	P_paeminosus	7		pedra vermelha	64.9743	0.433962
calyptovaca2	duro	32	1	7	46	162.7	16.04	0.004	0.156	snake-like	C_nicterus	2		vacaria	65.0217	1
proteal18prima	areia	22	2	0	68	265.3	15	0.004	0.272	lacertoid	P_tetradactylus	6		alagoado	65.0245	0.51525
micrat11greg	areia	22	1	5	65	235.3	15.06	0.004	0.24	lacertoid	M_maximiliani	8		catimbau	65.1007	0.828679
gampsi1	duro	32	1	23	58	146.4	16.04	0.004	0.14	lacertoid	P_paeminosus	9		gameleira	65.1942	1
micrat11rcomp	areia	27	1	43	96	208.7	15.06	0.004	0.212	lacertoid	M_maximiliani	15		catimbau	65.3675	0.774175
vanzovacafil	duro	42	2	2	42	167.9	16.04	0.004	0.16	lacertoid	V_rubricauda	5		vacaria	65.4224	0.738563
gampsi13	areia	32	1	22	64	176.5	16.04	0.004	0.168	lacertoid	P_paeminosus	9		gameleira	65.4985	1
calyptovaca1	areia	32	1	7	35	117.7	16.04	0.004	0.112	snake-like	C_nicterus	2		vacaria	65.517	1
vanzovacagrande	areia	37	2	5	49	185	16.04	0.004	0.176	lacertoid	V_rubricauda	3		vacaria	65.5322	0.810742
calyptovaca9	duro	22	1	3	49	193.9	16.04	0.004	0.184	snake-like	C_nicterus	4		vacaria	65.6985	1
micrat11greg	areia	32	1	19	64	178.5	15.06	0.004	0.18	lacertoid	M_maximiliani	7		catimbau	65.8477	0.838188
micrat20rcomp	areia	37	1	29	62	131.3	15.06	0.004	0.132	lacertoid	M_maximiliani	9		catimbau	66.0489	0.798953
notoal12	duro	42	1	0	51	203.4	15	0.004	0.204	snake-like	N_ablephara	3		alagoado	66.4706	1
vanzovacagrande	duro	37	1	26	69	183.4	16.04	0.004	0.172	lacertoid	V_rubricauda	3		vacaria	66.4763	0.762406
micrat11peqreg	duro	22	1	10	62	208.4	15.06	0.004	0.208	lacertoid	M_maximiliani	8		catimbau	66.5288	0.755218
micrat11rcomp	duro	27	1	27	78	204.4	15.06	0.004	0.204	lacertoid	M_maximiliani	15		catimbau	66.5313	0.862933
notoal12mais	duro	42	2	4	61	227.6	15	0.004	0.228	snake-like	N_ablephara	3		alagoado	66.5497	1
gampsi13	duro	32	2	8	54	197	16.04	0.004	0.184	lacertoid	P_paeminosus	9		gameleira	66.7489	0.599289
gampsi19	areia	27	1	5	36	133.5	16.04	0.004	0.124	lacertoid	P_paeminosus	1		gameleira	67.1205	0.966028
gampsi17	areia	42	1	0	42	180.9	16.04	0.004	0.168	lacertoid	P_paeminosus	5		gameleira	67.1313	0.410204
gampsi23	duro	22	2	11	61	215.4	16.04	0.004	0.2	lacertoid	P_paeminosus	4		gameleira	67.1446	0.704739
proteal9	duro	22	1	11	74	253.9	15	0.004	0.252	lacertoid	P_tetradactylus	6		alagoado	67.1693	0.738765
proteal18	areia	37	2	3	41	153.2	15	0.004	0.152	lacertoid	P_tetradactylus	5		alagoado	67.193	0.729871
micrat11peqnovo	areia	32	2	10	57	191.1	15.06	0.004	0.188	lacertoid	M_maximiliani	7	era peqrareia2	catimbau	67.496	1
micragrandeotilia	areia	42	1	10	62	212.5	15.06	0.004	0.208	lacertoid	M_maximiliani	3		catimbau	67.8376	0.511309
proteal19	duro	27	2	30	92	253.6	15	0.004	0.248	lacertoid	P_tetradactylus	2		alagoado	68.172	0.701358
vanzonegro	areia	42	1	7	54	193.1	15.06	0.004	0.188	lacertoid	V_rubricauda	10		catimbau	68.2024	0.82434
vanzopv2	areia	37	1	1	29	123.2	16.04	0.004	0.112	lacertoid	V_rubricauda	7		pedra vermelha	68.5786	0.812762
micrat20reg	areia	27	3	51	112	252.1	15.06	0.004	0.244	lacertoid	M_maximiliani	15		catimbau	68.6054	0.685681
proery5	duro	27	1	74	118	181.2	15	0.004	0.176	lacertoid	P_erythrocercus	3		alagoado	68.6364	0.500105
proteal19	areia	27	1	49	105	230.9	15	0.004	0.224	lacertoid	P_tetradactylus	2		alagoado	68.7202	0.977837
vanzoextra	areia	27	1	44	101	236.3	15.06	0.004	0.228	lacertoid	V_rubricauda	6		catimbau	68.8183	0.712305
proteal22	duro	42	2	12	48	148.7	15	0.004	0.144	lacertoid	P_tetradactylus	8		alagoado	68.8426	0.843791
micrat11rcomp	areia	32	1	43	93	207.8	15.06	0.004	0.2	lacertoid	M_maximiliani	7		catimbau	68.9907	0.817087
calyptomg1	areia	32	2	19	62	191.4	16.04	0.004	0.172	snake-like	C_sinebrachiatus	2		gameleira	69.376	1
gampsi19	areia	37	2	13	51	169.4	16.04	0.004	0.152	lacertoid	P_paeminosus	3		gameleira	69.4809	1
vanzodana2semi	areia	37	1	45	89	196.2	16.04	0.004	0.176	lacertoid	V_rubricauda	3		vacaria	69.4995	0.952684
vanzodana410	areia	42	1	31	74	192.1	16.04	0.004	0.172	lacertoid	V_rubricauda	5		vacaria	69.6297	1
gampsi23prima	duro	37	2	12	50	170.1	16.04	0.004	0.152	lacertoid	P_paeminosus	3		gameleira	69.768	0.893588
calyptovaca10	duro	22	1	9	150	68.7	16.04	0.004	0.564	snake-like	C_nicterus	10		vacaria	7.59405	0.278592
leioal20	duro	32	2	15	271	119.9	15	0.004	1.024	snake-like	C_leiolepis	4		alagoado	7.80599	0.247169
calyptovaca5	duro	32	2	4	43	175.2	16.04	0.004	0.156	snake-like	C_nicterus	2		vacaria	70.0173	1
calyptopv1	areia	22	1	7	45	170.8	16.04	0.004	0.152	snake-like	C_sinebrachiatus	4		pedra vermelha	70.0551	1
vanzodana1fil	areia	27	2	13	58	202.3	16.04	0.004	0.18	lacertoid	V_rubricauda	1		vacaria	70.0679	1
proteal25	areia	27	1	5	52	197.7	15	0.004	0.188	lacertoid	P_tetradactylus	8		alagoado	70.1064	0.892099
micrat20reg	duro	42	2	43	97	228.1	15.06	0.004	0.216	lacertoid	M_maximiliani	10		catimbau	70.1208	0.589954
gampsi22	duro	42	1	6	40	153	16.04	0.004	0.136	lacertoid	P_paeminosus	5		gameleira	70.1372	0.99631
proteal19	areia	37	1	49	103	227.7	15	0.004	0.216	lacertoid	P_tetradactylus	5		alagoado	70.2778	1
vanzodana1grande	duro	27	2	89	146	257.1	16.04	0.004	0.228	lacertoid	V_rubricauda	1		vacaria	70.3012	1
micrat20rcomp	areia	27	2	11	68	241.5	15.06	0.004	0.228	lacertoid	M_maximiliani	15	(tres corridas no mesmo tratamento?)	catimbau	70.3327	0.850772
gampsi8	areia	37	1	11	49	171.5	16.04	0.004	0.152	lacertoid	P_paeminosus	7		gameleira	70.3422	0.876341
gampsi22	duro	37	1	3	39	162.6	16.04	0.004	0.144	lacertoid	P_paeminosus	7		gameleira	70.3969	1
proteal1	areia	22	1	30	87	241.7	15	0.004	0.228	lacertoid	P_tetradactylus	6		alagoado	70.6725	0.841634
micragrandeotilia	duro	22	1	3	70	285.5	15.06	0.004	0.268	lacertoid	M_maximiliani	8		catimbau	70.737	0.682631
micrat20reg	duro	27	1	13	66	225.9	15.06	0.004	0.212	lacertoid	M_maximiliani	15		catimbau	70.7547	0.595288
vanzoextra	areia	32	2	11	59	204.7	15.06	0.004	0.192	lacertoid	V_rubricauda	7		catimbau	70.7932	0.732746
proery7	areia	37	1	3	36	141	15.028	0.004	0.132	lacertoid	P_erythrocercus	4		alagoado	71.0794	0.637892
gampsi16	duro	22	1	9	58	223.7	16.04	0.004	0.196	lacertoid	P_paeminosus	4		gameleira	71.155	0.84788
psiloina	duro	22	1	3	47	200.9	16.04	0.004	0.176	lacertoid	P_paeminosus	4		pedra vermelha	71.1644	0.347482
vanzodana1medio	areia	27	2	16	66	229.7	16.04	0.004	0.2	lacertoid	V_rubricauda	1		vacaria	71.6022	1
micrat11greg	areia	37	1	8	48	173.6	15.06	0.004	0.16	lacertoid	M_maximiliani	9		catimbau	72.0452	0.917076
gampsi13	duro	22	1	5	58	245.4	16.04	0.004	0.212	lacertoid	P_paeminosus	4		gameleira	72.1663	0.647927
micrat7grande	areia	27	2	15	74	257.1	15.06	0.004	0.236	lacertoid	M_maximiliani	6		catimbau	72.3378	0.688732
proery9	duro	27	1	14	71	247.4	15	0.004	0.228	lacertoid	P_erythrocercus	1		alagoado	72.3392	0.701916
micraotiliapeq	areia	37	1	13	57	192.4	15.06	0.004	0.176	lacertoid	M_maximiliani	2		catimbau	72.5884	0.963826
gampsi8	areia	32	1	20	58	177.2	16.04	0.004	0.152	lacertoid	P_paeminosus	9		gameleira	72.6801	0.905468
vanzodana2semi	areia	42	2	11	47	168.5	16.04	0.004	0.144	lacertoid	V_rubricauda	5		vacaria	72.9513	1
proery4	areia	27	1	0	48	210.2	15	0.004	0.192	lacertoid	P_erythrocercus	5		alagoado	72.9861	0.550977
gampsi23prima	duro	22	1	4	48	206.8	16.04	0.004	0.176	lacertoid	P_paeminosus	4		gameleira	73.2544	0.938241
gampsi16	areia	37	1	29	77	225.7	16.04	0.004	0.192	lacertoid	P_paeminosus	7		gameleira	73.2868	1
calyptobrit2	duro	32	2	6	45	183.5	16.04	0.004	0.156	snake-like	C_sinebrachiatus	2		pedra vermelha	73.3343	1
vanzodana1_fil	duro	27	2	11	62	240.1	16.04	0.004	0.204	lacertoid	V_rubricauda	1		vacaria	73.3766	1
micragrandeotilia	duro	37	2	8	47	172.5	15.06	0.004	0.156	lacertoid	M_maximiliani	2	<3 passos	catimbau	73.4243	0.708564
micrat7peq	areia	22	1	6	83	340.7	15.06	0.004	0.308	lacertoid	M_maximiliani	1		catimbau	73.4508	0.863734
micrat20reg	areia	37	2	3	51	212.5	15.06	0.004	0.192	lacertoid	M_maximiliani	9		catimbau	73.4908	0.734509
proteal11	areia	42	2	46	79	145.9	15	0.004	0.132	lacertoid	P_tetradactylus	3		alagoado	73.6869	1
micrat11peqreg	areia	22	1	50	112	277.5	15.06	0.004	0.248	lacertoid	M_maximiliani	8		catimbau	74.2996	1
proteal18prima	areia	32	1	1	51	223.3	15	0.004	0.2	lacertoid	P_tetradactylus	4		alagoado	74.4333	0.589805
gampsi19	duro	27	1	15	52	177.1	16.04	0.004	0.148	lacertoid	P_paeminosus	1		gameleira	74.6023	0.913247
gampsi22	areia	42	1	6	34	134.3	16.04	0.004	0.112	lacertoid	P_paeminosus	5		gameleira	74.7573	1
micrat11rcomp	duro	32	2	60	105	202.7	15.06	0.004	0.18	lacertoid	M_maximiliani	7		catimbau	74.775	0.969856
micrat11greg	duro	27	1	26	77	230.2	15.06	0.004	0.204	lacertoid	M_maximiliani	15	a mediþÒo inclui o pulo, ficou muito mais rßpido (desconsiderar?)	catimbau	74.929	0.616955
proery1	areia	32	1	28	62	153	15	0.004	0.136	lacertoid	P_erythrocercus	3		alagoado	75	0.693205
micrat11rcomp	duro	42	2	76	121	204	15.06	0.004	0.18	lacertoid	M_maximiliani	3		catimbau	75.2545	0.976077
micraotiliapeq	areia	42	1	57	95	172.4	15.06	0.004	0.152	lacertoid	M_maximiliani	3		catimbau	75.3128	1
vanzosemilist	duro	42	2	15	49	154.5	15.06	0.004	0.136	lacertoid	V_rubricauda	3		catimbau	75.4336	0.726871
gampsi1	areia	42	2	4	29	121.2	16.04	0.004	0.1	lacertoid	P_paeminosus	5		gameleira	75.5611	0.932948
proteal9	duro	27	1	20	68	217.7	15	0.004	0.192	lacertoid	P_tetradactylus	8		alagoado	75.5903	0.831384
micrat20reg	areia	22	1	5	67	282.5	15.06	0.004	0.248	lacertoid	M_maximiliani	8	acho que sÒo todos o mesmo, confirmar	catimbau	75.6383	0.755972
proteal1	duro	22	2	0	66	299.6	15	0.004	0.264	lacertoid	P_tetradactylus	6		alagoado	75.6566	0.628531
micrat11greg	duro	37	2	19	58	178	15.06	0.004	0.156	lacertoid	M_maximiliani	9		catimbau	75.7653	0.623841
proery3	areia	27	2	0	46	211	15	0.004	0.184	lacertoid	P_erythrocercus	5		alagoado	76.4493	0.791281
vanzodana418	areia	42	2	3	36	162	16.04	0.004	0.132	lacertoid	V_rubricauda	5		vacaria	76.5133	0.920303
proteal1	duro	32	3	100	140	184.5	15	0.004	0.16	lacertoid	P_tetradactylus	1		alagoado	76.875	0.638654
proteal18	duro	42	3	57	96	180	15	0.004	0.156	lacertoid	P_tetradactylus	3		alagoado	76.9231	1
proery7	areia	32	2	2	34	147.9	15	0.004	0.128	lacertoid	P_erythrocercus	5		alagoado	77.0312	0.691306
gampsi19	duro	42	2	4	38	168.1	16.04	0.004	0.136	lacertoid	P_paeminosus	5		gameleira	77.0592	0.943322
vanzovacavul1	areia	32	1	8	49	202.8	16.04	0.004	0.164	lacertoid	V_rubricauda	2		vacaria	77.0939	0.885456
micrat11rcomp	duro	37	2	17	62	209	15.06	0.004	0.18	lacertoid	M_maximiliani	9		catimbau	77.099	1
micraotiliapeq	duro	37	2	7	51	204.5	15.06	0.004	0.176	lacertoid	M_maximiliani	2		catimbau	77.1535	1
gampsi23	areia	37	2	18	52	168.6	16.04	0.004	0.136	lacertoid	P_paeminosus	7		gameleira	77.2884	0.849006
gampsi14	areia	42	1	14	43	144.2	16.04	0.004	0.116	lacertoid	P_paeminosus	5		gameleira	77.5002	0.495783
proery9	duro	32	1	2	53	237.9	15	0.004	0.204	lacertoid	P_erythrocercus	7		alagoado	77.7451	0.75437
vanzopv2	duro	37	2	14	41	134.7	16.04	0.004	0.108	lacertoid	V_rubricauda	7		pedra vermelha	77.757	0.875244
proery6	duro	27	1	33	86	247.3	15	0.004	0.212	lacertoid	P_erythrocercus	5		alagoado	77.7673	0.785672
gampsi23prima	duro	42	1	16	48	160.3	16.04	0.004	0.128	lacertoid	P_paeminosus	5		gameleira	78.0763	1
proery7	duro	32	2	25	59	159.3	15	0.004	0.136	lacertoid	P_erythrocercus	5		alagoado	78.0882	0.812215
vanzovacavul1	duro	32	1	27	67	201.3	16.04	0.004	0.16	lacertoid	V_rubricauda	2		vacaria	78.4367	0.721962
micrat7grande	duro	37	1	66	109	203.2	15.06	0.004	0.172	lacertoid	M_maximiliani	2		catimbau	78.4459	0.801701
gampsi8	duro	42	2	20	60	201.4	16.04	0.004	0.16	lacertoid	P_paeminosus	5		gameleira	78.4757	0.89115
gampsi19	duro	22	2	4	43	196.5	16.04	0.004	0.156	lacertoid	P_paeminosus	4		gameleira	78.5296	0.961323
vanzodana2fil	duro	37	1	4	30	131	16.04	0.004	0.104	lacertoid	V_rubricauda	3		vacaria	78.5296	1
gampsi17	duro	27	2	26	64	191.5	16.04	0.004	0.152	lacertoid	P_paeminosus	1		gameleira	78.5454	0.56593
micrat11greg	areia	42	1	29	66	175.1	15.06	0.004	0.148	lacertoid	M_maximiliani	3		catimbau	78.5596	1
proteal25	areia	42	1	2	35	155.6	15	0.004	0.132	lacertoid	P_tetradactylus	3		alagoado	78.5859	1
calyptomg1	duro	32	1	3	43	201.9	16.04	0.004	0.16	snake-like	C_sinebrachiatus	2		gameleira	78.6705	1
proteal19	duro	37	2	44	89	212.7	15	0.004	0.18	lacertoid	P_tetradactylus	5		alagoado	78.7778	0.810471
proteal18prima	areia	27	2	25	70	213.2	15	0.004	0.18	lacertoid	P_tetradactylus	8		alagoado	78.963	0.625697
vanzodana415	areia	37	2	2	33	157.4	16.04	0.004	0.124	lacertoid	V_rubricauda	7		vacaria	79.1368	0.876929
vanzovacafil	areia	37	2	22	51	147.3	16.04	0.004	0.116	lacertoid	V_rubricauda	3		vacaria	79.1663	0.957298
psiloina	areia	42	1	49	74	127.2	16.04	0.004	0.1	lacertoid	P_paeminosus	5		pedra vermelha	79.3017	0.529655
gampsi14	areia	22	2	0	43	218.8	16.04	0.004	0.172	lacertoid	P_paeminosus	4		gameleira	79.3075	0.507345
proteal25	duro	32	2	7	52	214.4	15	0.004	0.18	lacertoid	P_tetradactylus	4		alagoado	79.4074	0.553362
vanzoextra	duro	27	1	0	51	244.8	15.06	0.004	0.204	lacertoid	V_rubricauda	6		catimbau	79.6813	0.674595
gampsi13	duro	37	1	5	41	184.3	16.04	0.004	0.144	lacertoid	P_paeminosus	7		gameleira	79.7918	0.716392
proery1	areia	27	1	4	40	172.7	15.028	0.004	0.144	lacertoid	P_erythrocercus	10		alagoado	79.8047	0.737614
micragrandet22	duro	32	1	62	109	226.7	15.06	0.004	0.188	lacertoid	M_maximiliani	7	(c pulo)	catimbau	80.0698	1
gampsi8	areia	22	2	8	52	226.6	16.04	0.004	0.176	lacertoid	P_paeminosus	4		gameleira	80.2681	1
micrat20rcomp	areia	32	2	25	66	198.4	15.06	0.004	0.164	lacertoid	M_maximiliani	7		catimbau	80.3291	0.971692
proery4	duro	22	2	28	85	274.9	15	0.004	0.228	lacertoid	P_erythrocercus	7		alagoado	80.3801	0.724356
micragrandeotilia	areia	27	1	5	58	257.3	15.06	0.004	0.212	lacertoid	M_maximiliani	6		catimbau	80.5896	0.607424
vanzovacagrande	areia	32	2	4	47	223	16.04	0.004	0.172	lacertoid	V_rubricauda	2		vacaria	80.8299	1
proteal18	areia	22	2	0	61	296.1	15	0.004	0.244	lacertoid	P_tetradactylus	6		alagoado	80.9016	0.878779
gampsi1	areia	37	2	5	33	145.5	16.04	0.004	0.112	lacertoid	P_paeminosus	7		gameleira	80.9917	1
micrat20rcomp	duro	27	1	6	49	211.1	15.06	0.004	0.172	lacertoid	M_maximiliani	15		catimbau	81.4957	0.678705
proery1	areia	37	2	70	107	181.3	15.028	0.004	0.148	lacertoid	P_erythrocercus	5		alagoado	81.5145	0.753417
proteal22	duro	32	1	4	46	205.6	15	0.004	0.168	lacertoid	P_tetradactylus	4		alagoado	81.5873	1
proery8	duro	37	2	62	91	142.3	15.028	0.004	0.116	lacertoid	P_erythrocercus	4		alagoado	81.6292	0.772187
gampsi19	duro	37	2	39	73	178.2	16.04	0.004	0.136	lacertoid	P_paeminosus	3		gameleira	81.6892	1
gampsi17	duro	42	1	22	53	164.4	16.04	0.004	0.124	lacertoid	P_paeminosus	5		gameleira	82.6563	0.595549
micrat20rcomp	areia	42	1	52	92	199.2	15.06	0.004	0.16	lacertoid	M_maximiliani	10		catimbau	82.6693	1
vanzovacafil	areia	32	2	12	46	180.4	16.04	0.004	0.136	lacertoid	V_rubricauda	2		vacaria	82.6977	1
vanzonegro	areia	27	1	22	72	249.2	15.06	0.004	0.2	lacertoid	V_rubricauda	6		catimbau	82.7357	1
vanzodana418	areia	37	1	4	42	202.7	16.04	0.004	0.152	lacertoid	V_rubricauda	7		vacaria	83.1392	1
vanzot17semilist	areia	37	1	40	76	180.7	15.06	0.004	0.144	lacertoid	V_rubricauda	9		catimbau	83.3241	0.995151
vanzot17semilist	areia	42	1	11	52	206.8	15.06	0.004	0.164	lacertoid	V_rubricauda	10		catimbau	83.7301	1
vanzodana418	duro	42	1	19	55	193.4	16.04	0.004	0.144	lacertoid	V_rubricauda	5		vacaria	83.7316	0.992628
gampsi18	areia	27	2	17	47	161.4	16.04	0.004	0.12	lacertoid	P_paeminosus	1		gameleira	83.8529	1
vanzot17semilist	duro	42	1	8	54	232.4	15.06	0.004	0.184	lacertoid	V_rubricauda	10		catimbau	83.8674	0.665556
gampsi16	duro	37	1	19	51	172.3	16.04	0.004	0.128	lacertoid	P_paeminosus	3		gameleira	83.9211	1
proteal1	areia	42	2	34	68	171.3	15	0.004	0.136	lacertoid	P_tetradactylus	3		alagoado	83.9706	1
gampsi1	duro	37	2	14	46	172.8	16.04	0.004	0.128	lacertoid	P_paeminosus	7		gameleira	84.1646	0.861878
micrat7peq	duro	22	1	18	75	289.5	15.06	0.004	0.228	lacertoid	M_maximiliani	1		catimbau	84.3119	0.701235
vanzodana418	duro	37	2	3	36	178.6	16.04	0.004	0.132	lacertoid	V_rubricauda	7		vacaria	84.3535	1
vanzopv2	areia	42	2	13	35	119.1	16.04	0.004	0.088	lacertoid	V_rubricauda	5		pedra vermelha	84.3771	1
micrat11rcomp	areia	42	1	19	63	223.8	15.06	0.004	0.176	lacertoid	M_maximiliani	3		catimbau	84.435	1
micrat7peq	areia	37	2	9	50	208.6	15.06	0.004	0.164	lacertoid	M_maximiliani	2		catimbau	84.4589	0.993183
micrat7peq	areia	27	1	28	72	225.4	15.06	0.004	0.176	lacertoid	M_maximiliani	15		catimbau	85.0386	1
vanzodana1_medio	duro	27	2	33	86	289.6	16.04	0.004	0.212	lacertoid	V_rubricauda	1	duro? nao consta do nome, confirmar.	vacaria	85.1644	1
vanzodana415	duro	32	1	21	65	240.7	16.04	0.004	0.176	lacertoid	V_rubricauda	9		vacaria	85.2627	0.702842
vanzovacagrande	duro	32	2	18	61	235.4	16.04	0.004	0.172	lacertoid	V_rubricauda	2		vacaria	85.3245	0.978573
proteal18prima	duro	27	2	0	41	210.5	15	0.004	0.164	lacertoid	P_tetradactylus	8		alagoado	85.5691	0.7321
micrat7peq	duro	27	2	3	42	201.4	15.06	0.004	0.156	lacertoid	M_maximiliani	15		catimbau	85.7255	0.712992
proteal9	areia	32	2	8	53	232.1	15	0.004	0.18	lacertoid	P_tetradactylus	4		alagoado	85.963	1
vanzovacafil	duro	37	2	2	29	149.2	16.04	0.004	0.108	lacertoid	V_rubricauda	3		vacaria	86.1273	0.972304
vanzovacavul1	areia	37	1	4	39	193.6	16.04	0.004	0.14	lacertoid	V_rubricauda	3		vacaria	86.213	0.990194
vanzovacamedio	areia	42	1	4	29	138.9	16.04	0.004	0.1	lacertoid	V_rubricauda	5		vacaria	86.596	0.908751
Proteal11	duro	27	1	4	54	261.1	15	0.004	0.2	lacertoid	P_tetradactylus	2		alagoado	87.0333	1
vanzovacavul1	areia	42	2	40	69	162	16.04	0.004	0.116	lacertoid	V_rubricauda	5		vacaria	87.0668	1
vanzovacagrande	duro	42	1	4	39	195.8	16.04	0.004	0.14	lacertoid	V_rubricauda	5		vacaria	87.1927	1
micrat11peqnovo	duro	32	1	63	100	194.5	15.06	0.004	0.148	lacertoid	M_maximiliani	7	este tinha pulo no nome , confirmarque sao todos o mesmo.confirmado	catimbau	87.2636	1
gampsi17	duro	37	1	24	60	201.8	16.04	0.004	0.144	lacertoid	P_paeminosus	3		gameleira	87.3684	0.629501
vanzot17semilist	duro	27	2	24	65	216.1	15.06	0.004	0.164	lacertoid	V_rubricauda	15		catimbau	87.4955	0.694348
vanzodana2list	areia	37	1	3	36	185.6	16.04	0.004	0.132	lacertoid	V_rubricauda	3		vacaria	87.6596	0.702705
proery4	duro	42	1	75	123	253.4	15	0.004	0.192	lacertoid	P_erythrocercus	6		alagoado	87.9861	0.792898
gampsi8	duro	22	2	6	48	237.3	16.04	0.004	0.168	lacertoid	P_paeminosus	4		gameleira	88.0611	1
micrat11peqreg	duro	37	2	16	61	238.8	15.06	0.004	0.18	lacertoid	M_maximiliani	9		catimbau	88.0921	1
vanzoextra	areia	42	1	9	42	175.8	15.06	0.004	0.132	lacertoid	V_rubricauda	3	acho que sao o mesmo bicho, confirmar. Confrmado	catimbau	88.4341	0.915339
vanzodana2fil	areia	37	1	4	33	164.6	16.04	0.004	0.116	lacertoid	V_rubricauda	7		vacaria	88.4642	1
vanzovacafil	duro	32	2	17	53	204.6	16.04	0.004	0.144	lacertoid	V_rubricauda	2		vacaria	88.5806	1
vanzopv2	duro	42	1	21	43	125.4	16.04	0.004	0.088	lacertoid	V_rubricauda	5		pedra vermelha	88.8404	1
proery8	duro	32	1	17	51	181.4	15	0.004	0.136	lacertoid	P_erythrocercus	5		alagoado	88.9216	0.84117
gampsi23	duro	37	1	20	53	189.6	16.04	0.004	0.132	lacertoid	P_paeminosus	3		gameleira	89.5489	0.93989
micrat7grande	duro	27	2	2	53	275.2	15.06	0.004	0.204	lacertoid	M_maximiliani	6		catimbau	89.5763	0.915452
proery3	areia	42	1	19	49	161.7	15	0.004	0.12	lacertoid	P_erythrocercus	6		alagoado	89.8333	0.929811
vanzolist	duro	27	1	75	122	254.5	15.06	0.004	0.188	lacertoid	V_rubricauda	6		catimbau	89.8887	0.727
vanzodana415	areia	42	2	31	61	173.7	16.04	0.004	0.12	lacertoid	V_rubricauda	5		vacaria	90.2431	1
vanzovacamedio	duro	32	2	5	42	215.7	16.04	0.004	0.148	lacertoid	V_rubricauda	2		vacaria	90.8624	0.876102
proteal9	duro	32	1	67	105	207.3	15	0.004	0.152	lacertoid	P_tetradactylus	4		alagoado	90.9211	1
psiloina	duro	42	1	56	85	169.3	16.04	0.004	0.116	lacertoid	P_paeminosus	5		pedra vermelha	90.9902	0.444287
gampsi23	areia	42	1	21	48	157.7	16.04	0.004	0.108	lacertoid	P_paeminosus	5		gameleira	91.034	1
proery5	duro	37	1	6	35	158.9	15	0.004	0.116	lacertoid	P_erythrocercus	1		alagoado	91.3218	0.665399
vanzonegro	duro	27	1	27	74	258.7	15.06	0.004	0.188	lacertoid	V_rubricauda	6		catimbau	91.3721	0.789064
proery7	duro	42	1	58	87	159.8	15	0.004	0.116	lacertoid	P_erythrocercus	2		alagoado	91.8391	0.95524
proteal18	areia	42	2	7	45	209.9	15	0.004	0.152	lacertoid	P_tetradactylus	3		alagoado	92.0614	1
protealp2	areia	32	2	29	65	199.7	15	0.004	0.144	lacertoid	P_tetradactylus	4		alagoado	92.4537	1
proery3	areia	32	2	4	39	194.2	15	0.004	0.14	lacertoid	P_erythrocercus	1		alagoado	92.4762	0.957166
gampsi23prima	areia	37	2	4	29	148.6	16.04	0.004	0.1	lacertoid	P_paeminosus	3		gameleira	92.6434	1
proery5	duro	32	2	5	41	200.2	15	0.004	0.144	lacertoid	P_erythrocercus	5		alagoado	92.6852	0.675332
vanzovacamedio	areia	37	2	4	35	185.3	16.04	0.004	0.124	lacertoid	V_rubricauda	3		vacaria	93.1643	0.977679
proteal18prima	duro	42	1	3	34	173.3	15	0.004	0.124	lacertoid	P_tetradactylus	8		alagoado	93.172	0.797148
vanzopv1	areia	32	1	30	60	179.9	16.04	0.004	0.12	lacertoid	V_rubricauda	9		vacaria	93.4643	0.695992
micragrandet22	areia	32	1	9	59	281.8	15.06	0.004	0.2	lacertoid	M_maximiliani	7	(c pulo)	catimbau	93.5591	1
vanzoextra	duro	32	1	14	54	226.2	15.06	0.004	0.16	lacertoid	V_rubricauda	7		catimbau	93.8745	0.794757
proery1	duro	27	1	3	38	197.7	15.028	0.004	0.14	lacertoid	P_erythrocercus	10		alagoado	93.9675	0.701118
proery4	areia	37	1	10	37	153.6	15	0.004	0.108	lacertoid	P_erythrocercus	3		alagoado	94.8148	0.715764
gampsi23	duro	42	1	50	81	189.5	16.04	0.004	0.124	lacertoid	P_paeminosus	5		gameleira	95.2759	1
vanzovacamedio	areia	32	1	4	40	220.1	16.04	0.004	0.144	lacertoid	V_rubricauda	2		vacaria	95.2913	1
proery4	duro	27	1	7	47	229.4	15	0.004	0.16	lacertoid	P_erythrocercus	5		alagoado	95.5833	0.861361
proery9	duro	42	2	9	50	235.6	15.028	0.004	0.164	lacertoid	P_erythrocercus	8		alagoado	95.5939	0.927559
proery6	duro	37	1	3	39	207.3	15.028	0.004	0.144	lacertoid	P_erythrocercus	4		alagoado	95.7934	0.967787
psiloina	duro	37	2	2	28	159.8	16.04	0.004	0.104	lacertoid	P_paeminosus	3		pedra vermelha	95.7942	0.467744
proery7	duro	37	2	112	141	167.6	15.028	0.004	0.116	lacertoid	P_erythrocercus	4		alagoado	96.1424	1
micrat7grande	areia	42	2	24	61	215.3	15.06	0.004	0.148	lacertoid	M_maximiliani	3		catimbau	96.5956	0.919692
vanzoextra	areia	37	1	4	39	203.7	15.06	0.004	0.14	lacertoid	V_rubricauda	2		catimbau	96.6135	1
proery3	areia	37	2	8	40	185.5	15	0.004	0.128	lacertoid	P_erythrocercus	3		alagoado	96.6146	1
proery3	duro	27	1	4	42	220.4	15	0.004	0.152	lacertoid	P_erythrocercus	5		alagoado	96.6667	0.81724
proteal19	duro	42	1	28	53	145.8	15	0.004	0.1	lacertoid	P_tetradactylus	3		alagoado	97.2	1
gampsi17	areia	37	1	1	28	168.7	16.04	0.004	0.108	lacertoid	P_paeminosus	3		gameleira	97.3839	0.595062
gampsi1	duro	42	1	7	33	162.9	16.04	0.004	0.104	lacertoid	P_paeminosus	5		gameleira	97.6525	1
vanzolist	areia	32	1	5	39	200.4	15.06	0.004	0.136	lacertoid	V_rubricauda	7		catimbau	97.8439	0.722182
micrat7grande	duro	42	2	19	55	212.2	15.06	0.004	0.144	lacertoid	M_maximiliani	3		catimbau	97.8493	1
gampsi14	duro	22	1	4	52	301.9	16.04	0.004	0.192	lacertoid	P_paeminosus	4		gameleira	98.0297	0.749229
micrat20pontareg	areia	32	1	28	67	230.7	15.06	0.004	0.156	lacertoid	M_maximiliani	7		catimbau	98.197	1
micragrandeotilia	areia	22	1	36	96	355.8	15.06	0.004	0.24	lacertoid	M_maximiliani	8		catimbau	98.4396	0.741963
proery6	duro	32	1	8	44	214.2	15.028	0.004	0.144	lacertoid	P_erythrocercus	10		alagoado	98.9819	1
vanzot17semilist	duro	37	2	64	109	269.6	15.06	0.004	0.18	lacertoid	V_rubricauda	9		catimbau	99.454	0.789248
proery1	duro	32	1	15	47	191.4	15	0.004	0.128	lacertoid	P_erythrocercus	3		alagoado	99.6875	0.743797
vanzonegro	duro	37	2	17	53	216.3	15.06	0.004	0.144	lacertoid	V_rubricauda	9		catimbau	99.7399	0.861326

## Sheet: prey type
ind	species	treatment	ingested	morph
proteal1	P_tetradactylus	healthy	5	lacertiforme
proteal11	P_tetradactylus	healthy	5	lacertiforme
Proteal11	P_tetradactylus	healthy	4	lacertiforme
proteal18	P_tetradactylus	healthy	4	lacertiforme
proteal18	P_tetradactylus	healthy	5	lacertiforme
proteal19	P_tetradactylus	healthy	5	lacertiforme
proteal22	P_tetradactylus	healthy	5	lacertiforme
proteal25	P_tetradactylus	healthy	5	lacertiforme
proteal9	P_tetradactylus	healthy	5	lacertiforme
protealp2	P_tetradactylus	healthy	5	lacertiforme
proteal1	P_tetradactylus	injured	3	lacertiforme
proteal11	P_tetradactylus	injured	4	lacertiforme
Proteal11	P_tetradactylus	injured	4	lacertiforme
proteal18	P_tetradactylus	injured	5	lacertiforme
proteal18	P_tetradactylus	injured	5	lacertiforme
proteal19	P_tetradactylus	injured	5	lacertiforme
proteal22	P_tetradactylus	injured	5	lacertiforme
proteal25	P_tetradactylus	injured	5	lacertiforme
proteal9	P_tetradactylus	injured	5	lacertiforme
protealp2	P_tetradactylus	injured	5	lacertiforme
proery1	P_erythrocercus	injured	1	lacertiforme
"proery3"	P_erythrocercus	injured	2	lacertiforme
"proery4"	P_erythrocercus	injured	4	lacertiforme
"proery5"	P_erythrocercus	injured	4	lacertiforme
"proery6"	P_erythrocercus	injured	3	lacertiforme
"proery7"	P_erythrocercus	injured	3	lacertiforme
proery1	P_erythrocercus	healthy	0	lacertiforme
"proery3"	P_erythrocercus	healthy	3	lacertiforme
"proery4"	P_erythrocercus	healthy	0	lacertiforme
"proery5"	P_erythrocercus	healthy	2	lacertiforme
"proery6"	P_erythrocercus	healthy	2	lacertiforme
"proery7"	P_erythrocercus	healthy	0	lacertiforme
vanzobrit1	V_rubricauda	healthy	0	lacertiforme
vanzodana1_fil	V_rubricauda	healthy	2	lacertiforme
vanzodana1_medio	V_rubricauda	healthy	2	lacertiforme
vanzodana1fil	V_rubricauda	healthy	0	lacertiforme
vanzodana1grande	V_rubricauda	healthy	0	lacertiforme
vanzodana1medio	V_rubricauda	healthy	1	lacertiforme
vanzodana2fil	V_rubricauda	healthy	0	lacertiforme
vanzodana2list	V_rubricauda	healthy	1	lacertiforme
vanzodana2semi	V_rubricauda	healthy	0	lacertiforme
vanzodana410	V_rubricauda	healthy	1	lacertiforme
vanzobrit1	V_rubricauda	injured	4	lacertiforme
vanzodana1_fil	V_rubricauda	injured	1	lacertiforme
vanzodana1_medio	V_rubricauda	injured	4	lacertiforme
vanzodana1fil	V_rubricauda	injured	4	lacertiforme
vanzodana1grande	V_rubricauda	injured	3	lacertiforme
vanzodana1medio	V_rubricauda	injured	3	lacertiforme
vanzodana2fil	V_rubricauda	injured	3	lacertiforme
vanzodana2list	V_rubricauda	injured	2	lacertiforme
vanzodana2semi	V_rubricauda	injured	2	lacertiforme
vanzodana410	V_rubricauda	injured	1	lacertiforme
gampsi1	P_paeminosus	healthy	0	lacertiforme
"gampsi13"	P_paeminosus	healthy	1	lacertiforme
"gampsi14"	P_paeminosus	healthy	0	lacertiforme
"gampsi16"	P_paeminosus	healthy	0	lacertiforme
"gampsi17"	P_paeminosus	healthy	0	lacertiforme
gampsi1	P_paeminosus	injured	5	lacertiforme
"gampsi13"	P_paeminosus	injured	2	lacertiforme
"gampsi14"	P_paeminosus	injured	0	lacertiforme
"gampsi16"	P_paeminosus	injured	5	lacertiforme
"gampsi17"	P_paeminosus	injured	0	lacertiforme
notoal10	N_ablephara	healthy	2	serpentiforme
"notoal13"	N_ablephara	healthy	5	serpentiforme
"notoal14"	N_ablephara	healthy	2	serpentiforme
"notoal3"	N_ablephara	healthy	5	serpentiforme
"notoal6"	N_ablephara	healthy	5	serpentiforme
"notoal7"	N_ablephara	healthy	4	serpentiforme
"notopi2"	N_ablephara	healthy	5	serpentiforme
"notopi5"	N_ablephara	healthy	5	serpentiforme
notoal10	N_ablephara	injured	2	serpentiforme
"notoal13"	N_ablephara	injured	5	serpentiforme
"notoal14"	N_ablephara	injured	5	serpentiforme
"notoal3"	N_ablephara	injured	5	serpentiforme
"notoal6"	N_ablephara	injured	5	serpentiforme
"notoal7"	N_ablephara	injured	5	serpentiforme
"notopi2"	N_ablephara	injured	5	serpentiforme
"notopi5"	N_ablephara	injured	5	serpentiforme
scriptogrande	S_catimbau	healthy	1	serpentiforme
scriptomedio	S_catimbau	healthy	0	serpentiforme
scriptopeq	S_catimbau	healthy	0	serpentiforme
scriptot13	S_catimbau	healthy	1	serpentiforme
scriptot17	S_catimbau	healthy	2	serpentiforme
scriptot17peq	S_catimbau	healthy	1	serpentiforme
scriptot18	S_catimbau	healthy	0	serpentiforme
scriptot18regcomp	S_catimbau	healthy	0	serpentiforme
scriptot18rlongo	S_catimbau	healthy	1	serpentiforme
scriptot19	S_catimbau	healthy	1	serpentiforme
scriptogrande	S_catimbau	injured	2	serpentiforme
scriptomedio	S_catimbau	injured	4	serpentiforme
scriptopeq	S_catimbau	injured	3	serpentiforme
scriptot13	S_catimbau	injured	2	serpentiforme
scriptot17	S_catimbau	injured	2	serpentiforme
scriptot17peq	S_catimbau	injured	1	serpentiforme
scriptot18	S_catimbau	injured	2	serpentiforme
scriptot18regcomp	S_catimbau	injured	3	serpentiforme
scriptot18rlongo	S_catimbau	injured	4	serpentiforme
scriptot19	S_catimbau	injured	4	serpentiforme
leioal10	C_leiolepis	healthy	3	serpentiforme
"leioal13"	C_leiolepis	healthy	2	serpentiforme
"leioal20"	C_leiolepis	healthy	3	serpentiforme
"leioal21"	C_leiolepis	healthy	0	serpentiforme
"leioal22"	C_leiolepis	healthy	0	serpentiforme
"leioal5"	C_leiolepis	healthy	3	serpentiforme
"leioal6"	C_leiolepis	healthy	5	serpentiforme
"leioal7"	C_leiolepis	healthy	5	serpentiforme
"leioal8"	C_leiolepis	healthy	0	serpentiforme
"leioal9"	C_leiolepis	healthy	0	serpentiforme
leioal11	C_leiolepis	healthy	4	serpentiforme
lieioal12	C_leiolepis	healthy	4	serpentiforme
leioal10	C_leiolepis	injured	5	serpentiforme
"leioal13"	C_leiolepis	injured	5	serpentiforme
"leioal20"	C_leiolepis	injured	0	serpentiforme
"leioal21"	C_leiolepis	injured	2	serpentiforme
"leioal22"	C_leiolepis	injured	5	serpentiforme
"leioal5"	C_leiolepis	injured	4	serpentiforme
"leioal6"	C_leiolepis	injured	5	serpentiforme
"leioal7"	C_leiolepis	injured	5	serpentiforme
"leioal8"	C_leiolepis	injured	3	serpentiforme
"leioal9"	C_leiolepis	injured	2	serpentiforme
leioal11	C_leiolepis	injured	2	serpentiforme
lieioal12	C_leiolepis	injured	4	serpentiforme
micragrandeotilia	M_maximiliani	up	5	lacertiforme
"micragrandet22"	M_maximiliani	up	5	lacertiforme
"micraotiliapeq"	M_maximiliani	up	5	lacertiforme
"micrat11greg"	M_maximiliani	up	5	lacertiforme
"micrat11peqnovo"	M_maximiliani	up	5	lacertiforme
"micrat11peqreg"	M_maximiliani	up	5	lacertiforme
"micrat11rcomp"	M_maximiliani	up	5	lacertiforme
"micrat20pontareg"	M_maximiliani	up	5	lacertiforme
"micrat20rcomp"	M_maximiliani	up	5	lacertiforme
"micrat20reg"	M_maximiliani	up	5	lacertiforme
micragrandeotilia	M_maximiliani	down	0	lacertiforme
"micragrandet22"	M_maximiliani	down	0	lacertiforme
"micraotiliapeq"	M_maximiliani	down	0	lacertiforme
"micrat11greg"	M_maximiliani	down	0	lacertiforme
"micrat11peqnovo"	M_maximiliani	down	0	lacertiforme
"micrat11peqreg"	M_maximiliani	down	0	lacertiforme
"micrat11rcomp"	M_maximiliani	down	0	lacertiforme
"micrat20pontareg"	M_maximiliani	down	1	lacertiforme
"micrat20rcomp"	M_maximiliani	down	0	lacertiforme
"micrat20reg"	M_maximiliani	down	0	lacertiforme
vanzobrit1	V_rubricauda	up	4	lacertiforme
vanzodana1_fil	V_rubricauda	up	5	lacertiforme
vanzodana1_medio	V_rubricauda	up	3	lacertiforme
vanzodana1fil	V_rubricauda	up	4	lacertiforme
vanzodana1grande	V_rubricauda	up	5	lacertiforme
vanzodana1medio	V_rubricauda	up	5	lacertiforme
vanzodana2fil	V_rubricauda	up	5	lacertiforme
vanzodana2list	V_rubricauda	up	5	lacertiforme
vanzodana2semi	V_rubricauda	up	2	lacertiforme
vanzodana410	V_rubricauda	up	5	lacertiforme
vanzobrit1	V_rubricauda	down	0	lacertiforme
vanzodana1_fil	V_rubricauda	down	1	lacertiforme
vanzodana1_medio	V_rubricauda	down	0	lacertiforme
vanzodana1fil	V_rubricauda	down	1	lacertiforme
vanzodana1grande	V_rubricauda	down	0	lacertiforme
vanzodana1medio	V_rubricauda	down	0	lacertiforme
vanzodana2fil	V_rubricauda	down	0	lacertiforme
vanzodana2list	V_rubricauda	down	0	lacertiforme
vanzodana2semi	V_rubricauda	down	1	lacertiforme
vanzodana410	V_rubricauda	down	0	lacertiforme
gampsi1	P_paeminosus	up	5	lacertiforme
"gampsi13"	P_paeminosus	up	3	lacertiforme
"gampsi14"	P_paeminosus	up	5	lacertiforme
"gampsi16"	P_paeminosus	up	5	lacertiforme
"gampsi17"	P_paeminosus	up	5	lacertiforme
"gampsi18"	P_paeminosus	up	5	lacertiforme
"gampsi19"	P_paeminosus	up	5	lacertiforme
"gampsi22"	P_paeminosus	up	3	lacertiforme
"gampsi23"	P_paeminosus	up	4	lacertiforme
"gampsi23"	P_paeminosus	up	5	lacertiforme
gampsi1	P_paeminosus	down	1	lacertiforme
"gampsi13"	P_paeminosus	down	4	lacertiforme
"gampsi14"	P_paeminosus	down	3	lacertiforme
"gampsi16"	P_paeminosus	down	0	lacertiforme
"gampsi17"	P_paeminosus	down	0	lacertiforme
"gampsi18"	P_paeminosus	down	4	lacertiforme
"gampsi19"	P_paeminosus	down	0	lacertiforme
"gampsi22"	P_paeminosus	down	1	lacertiforme
"gampsi23"	P_paeminosus	down	1	lacertiforme
"gampsi23"	P_paeminosus	down	0	lacertiforme
scriptogrande	S_catimbau	up	4	serpentiforme
scriptomedio	S_catimbau	up	5	serpentiforme
scriptopeq	S_catimbau	up	0	serpentiforme
scriptot13	S_catimbau	up	1	serpentiforme
scriptot17	S_catimbau	up	5	serpentiforme
scriptot17peq	S_catimbau	up	5	serpentiforme
scriptot18	S_catimbau	up	4	serpentiforme
scriptot18regcomp	S_catimbau	up	4	serpentiforme
scriptot18rlongo	S_catimbau	up	4	serpentiforme
scriptot19	S_catimbau	up	1	serpentiforme
scriptogrande	S_catimbau	down	5	serpentiforme
scriptomedio	S_catimbau	down	5	serpentiforme
scriptopeq	S_catimbau	down	5	serpentiforme
scriptot13	S_catimbau	down	5	serpentiforme
scriptot17	S_catimbau	down	5	serpentiforme
scriptot17peq	S_catimbau	down	1	serpentiforme
scriptot18	S_catimbau	down	5	serpentiforme
scriptot18regcomp	S_catimbau	down	3	serpentiforme
scriptot18rlongo	S_catimbau	down	4	serpentiforme
scriptot19	S_catimbau	down	4	serpentiforme
notoal10	N_ablephara	up	4	serpentiforme
"notoal13"	N_ablephara	up	1	serpentiforme
"notoal14"	N_ablephara	up	5	serpentiforme
"notoal3"	N_ablephara	up	3	serpentiforme
notoal10	N_ablephara	down	5	serpentiforme
"notoal13"	N_ablephara	down	4	serpentiforme
"notoal14"	N_ablephara	down	5	serpentiforme
"notoal3"	N_ablephara	down	5	serpentiforme
calyptobrit1	C_sinebrachiatus	up	5	serpentiforme
calyptobrit2	C_sinebrachiatus	up	0	serpentiforme
calyptomg1	C_sinebrachiatus	up	0	serpentiforme
calyptomg2	C_sinebrachiatus	up	5	serpentiforme
calyptomg3	C_sinebrachiatus	up	5	serpentiforme
calyptopv1	C_sinebrachiatus	up	5	serpentiforme
calyptopv2	C_sinebrachiatus	up	5	serpentiforme
calyptopv3	C_sinebrachiatus	up	5	serpentiforme
"calyptopv4"	C_sinebrachiatus	up	5	serpentiforme
"calyptopv5"	C_sinebrachiatus	up	5	serpentiforme
calyptobrit1	C_sinebrachiatus	down	5	serpentiforme
calyptobrit2	C_sinebrachiatus	down	5	serpentiforme
calyptomg1	C_sinebrachiatus	down	5	serpentiforme
calyptomg2	C_sinebrachiatus	down	4	serpentiforme
calyptomg3	C_sinebrachiatus	down	5	serpentiforme
calyptopv1	C_sinebrachiatus	down	5	serpentiforme
calyptopv2	C_sinebrachiatus	down	5	serpentiforme
calyptopv3	C_sinebrachiatus	down	5	serpentiforme
"calyptopv4"	C_sinebrachiatus	down	5	serpentiforme
"calyptopv5"	C_sinebrachiatus	down	5	serpentiforme
calyptovaca1	C_nicterus	up	1	serpentiforme
"calyptovaca10"	C_nicterus	up	4	serpentiforme
"calyptovaca11"	C_nicterus	up	2	serpentiforme
"calyptovaca2"	C_nicterus	up	5	serpentiforme
"calyptovaca3"	C_nicterus	up	5	serpentiforme
"calyptovaca4"	C_nicterus	up	5	serpentiforme
"calyptovaca5"	C_nicterus	up	3	serpentiforme
"calyptovaca6"	C_nicterus	up	3	serpentiforme
"calyptovaca8"	C_nicterus	up	5	serpentiforme
"calyptovaca9"	C_nicterus	up	4	serpentiforme
calyptovaca1	C_nicterus	down	5	serpentiforme
"calyptovaca10"	C_nicterus	down	5	serpentiforme
"calyptovaca11"	C_nicterus	down	5	serpentiforme
"calyptovaca2"	C_nicterus	down	2	serpentiforme
"calyptovaca3"	C_nicterus	down	5	serpentiforme
"calyptovaca4"	C_nicterus	down	5	serpentiforme
"calyptovaca5"	C_nicterus	down	5	serpentiforme
"calyptovaca6"	C_nicterus	down	5	serpentiforme
"calyptovaca8"	C_nicterus	down	5	serpentiforme
"calyptovaca9"	C_nicterus	down	5	serpentiforme
proery1	P_erythrocercus	up	3	lacertiforme
"proery3"	P_erythrocercus	up	2	lacertiforme
"proery4"	P_erythrocercus	up	3	lacertiforme
"proery5"	P_erythrocercus	up	4	lacertiforme
"proery6"	P_erythrocercus	up	2	lacertiforme
"proery7"	P_erythrocercus	up	3	lacertiforme
proery1	P_erythrocercus	down	0	lacertiforme
"proery3"	P_erythrocercus	down	0	lacertiforme
"proery4"	P_erythrocercus	down	0	lacertiforme
"proery5"	P_erythrocercus	down	1	lacertiforme
"proery6"	P_erythrocercus	down	0	lacertiforme
"proery7"	P_erythrocercus	down	0	lacertiforme
leioal10	C_leiolepis	up	5	serpentiforme
"leioal13"	C_leiolepis	up	5	serpentiforme
"leioal20"	C_leiolepis	up	4	serpentiforme
"leioal21"	C_leiolepis	up	3	serpentiforme
"leioal22"	C_leiolepis	up	4	serpentiforme
"leioal5"	C_leiolepis	down	5	serpentiforme
"leioal6"	C_leiolepis	down	5	serpentiforme
"leioal7"	C_leiolepis	down	4	serpentiforme
"leioal8"	C_leiolepis	down	5	serpentiforme
"leioal9"	C_leiolepis	down	5	serpentiforme
proteal1	P_tetradactylus	up	3	lacertiforme
proteal11	P_tetradactylus	up	2	lacertiforme
Proteal11	P_tetradactylus	up	3	lacertiforme
proteal18	P_tetradactylus	up	4	lacertiforme
proteal18	P_tetradactylus	up	2	lacertiforme
proteal19	P_tetradactylus	up	3	lacertiforme
proteal22	P_tetradactylus	up	3	lacertiforme
proteal25	P_tetradactylus	up	4	lacertiforme
proteal9	P_tetradactylus	up	4	lacertiforme
protealp2	P_tetradactylus	up	4	lacertiforme
proteal1	P_tetradactylus	down	0	lacertiforme
proteal11	P_tetradactylus	down	1	lacertiforme
Proteal11	P_tetradactylus	down	0	lacertiforme
proteal18	P_tetradactylus	down	0	lacertiforme
proteal18	P_tetradactylus	down	0	lacertiforme
proteal19	P_tetradactylus	down	0	lacertiforme
proteal22	P_tetradactylus	down	0	lacertiforme
proteal25	P_tetradactylus	down	0	lacertiforme
proteal9	P_tetradactylus	down	2	lacertiforme
protealp2	P_tetradactylus	down	0	lacertiforme
calyptovaca1	C_nicterus	up	1	serpentiforme
"calyptovaca10"	C_nicterus	up	4	serpentiforme
"calyptovaca11"	C_nicterus	up	2	serpentiforme
"calyptovaca2"	C_nicterus	up	5	serpentiforme
"calyptovaca3"	C_nicterus	up	5	serpentiforme
"calyptovaca4"	C_nicterus	up	5	serpentiforme
"calyptovaca5"	C_nicterus	up	3	serpentiforme
"calyptovaca6"	C_nicterus	up	3	serpentiforme
"calyptovaca8"	C_nicterus	up	5	serpentiforme
"calyptovaca9"	C_nicterus	up	4	serpentiforme
calyptovaca1	C_nicterus	down	5	serpentiforme
"calyptovaca10"	C_nicterus	down	5	serpentiforme
"calyptovaca11"	C_nicterus	down	5	serpentiforme
"calyptovaca2"	C_nicterus	down	2	serpentiforme
"calyptovaca3"	C_nicterus	down	5	serpentiforme
"calyptovaca4"	C_nicterus	down	5	serpentiforme
"calyptovaca5"	C_nicterus	down	5	serpentiforme
"calyptovaca6"	C_nicterus	down	5	serpentiforme
"calyptovaca8"	C_nicterus	down	5	serpentiforme
"calyptovaca9"	C_nicterus	down	5	serpentiforme
calyptovaca1	C_nicterus	healthy	4	serpentiforme
"calyptovaca10"	C_nicterus	healthy	1	serpentiforme
"calyptovaca11"	C_nicterus	healthy	3	serpentiforme
"calyptovaca2"	C_nicterus	healthy	2	serpentiforme
"calyptovaca3"	C_nicterus	healthy	1	serpentiforme
"calyptovaca4"	C_nicterus	healthy	2	serpentiforme
"calyptovaca5"	C_nicterus	healthy	5	serpentiforme
"calyptovaca6"	C_nicterus	healthy	5	serpentiforme
"calyptovaca8"	C_nicterus	healthy	5	serpentiforme
calyptovaca1	C_nicterus	injured	5	serpentiforme
"calyptovaca10"	C_nicterus	injured	5	serpentiforme
"calyptovaca11"	C_nicterus	injured	3	serpentiforme
"calyptovaca2"	C_nicterus	injured	2	serpentiforme
"calyptovaca3"	C_nicterus	injured	5	serpentiforme
"calyptovaca4"	C_nicterus	injured	3	serpentiforme
"calyptovaca5"	C_nicterus	injured	5	serpentiforme
"calyptovaca6"	C_nicterus	injured	5	serpentiforme
"calyptovaca8"	C_nicterus	injured	4	serpentiforme
calyptobrit1	C_sinebrachiatus	injured	3	serpentiforme
calyptobrit2	C_sinebrachiatus	injured	1	serpentiforme
calyptomg1	C_sinebrachiatus	injured	2	serpentiforme
calyptomg2	C_sinebrachiatus	injured	5	serpentiforme
calyptomg3	C_sinebrachiatus	injured	5	serpentiforme
calyptopv1	C_sinebrachiatus	injured	5	serpentiforme
calyptopv2	C_sinebrachiatus	injured	5	serpentiforme
calyptopv3	C_sinebrachiatus	injured	5	serpentiforme
"calyptopv4"	C_sinebrachiatus	injured	4	serpentiforme
"calyptopv5"	C_sinebrachiatus	injured	5	serpentiforme
calyptobrit1	C_sinebrachiatus	healthy	3	serpentiforme
calyptobrit2	C_sinebrachiatus	healthy	0	serpentiforme
calyptomg1	C_sinebrachiatus	healthy	3	serpentiforme
calyptomg2	C_sinebrachiatus	healthy	4	serpentiforme
calyptomg3	C_sinebrachiatus	healthy	5	serpentiforme
calyptopv1	C_sinebrachiatus	healthy	5	serpentiforme
calyptopv2	C_sinebrachiatus	healthy	4	serpentiforme
calyptopv3	C_sinebrachiatus	healthy	5	serpentiforme
"calyptopv4"	C_sinebrachiatus	healthy	5	serpentiforme
"calyptopv5"	C_sinebrachiatus	healthy	5	serpentiforme
micragrandeotilia	M_maximiliani	healthy	3	lacertiforme
"micragrandet22"	M_maximiliani	healthy	4	lacertiforme
"micraotiliapeq"	M_maximiliani	healthy	3	lacertiforme
"micrat11greg"	M_maximiliani	healthy	5	lacertiforme
"micrat11peqnovo"	M_maximiliani	healthy	5	lacertiforme
"micrat11peqreg"	M_maximiliani	healthy	2	lacertiforme
"micrat11rcomp"	M_maximiliani	healthy	1	lacertiforme
"micrat20pontareg"	M_maximiliani	healthy	3	lacertiforme
micragrandeotilia	M_maximiliani	injured	5	lacertiforme
"micragrandet22"	M_maximiliani	injured	5	lacertiforme
"micraotiliapeq"	M_maximiliani	injured	5	lacertiforme
"micrat11greg"	M_maximiliani	injured	4	lacertiforme
"micrat11peqnovo"	M_maximiliani	injured	5	lacertiforme
"micrat11peqreg"	M_maximiliani	injured	5	lacertiforme
"micrat11rcomp"	M_maximiliani	injured	3	lacertiforme
"micrat20pontareg"	M_maximiliani	injured	1	lacertiforme

## Sheet: prey_availability
locality	sample	samplename	microhabitat	habitat	diversity	abundance	colembola	diptera	wasp	spider	blattodea	Orthoptera	Apterigota	coleoptera	Hemiptera	ant	larva	Diplopoda	acari	mollusca	PseudoescorpiÆo	lepidoptera	escorpion	desc	opiliao	homoptera	pupa	observations	plot
alagoado	1	alagoado1	surface	exposed	0	0	0	0	0	0	0	0	0	0	0	0	0	0	0	0	0	0	0	0	0	0	0
alagoado	2	alagoado2	surface	exposed	0	0	0	0	0	0	0	0	0	0	0	0	0	0	0	0	0	0	0	0	0	0	0
alagoado	3	alagoado3	surface	exposed	0	0	0	0	0	0	0	0	0	0	0	0	0	0	0	0	0	0	0	0	0	0	0
alagoado	4	alagoado4	surface	exposed	0	0	0	0	0	0	0	0	0	0	0	0	0	0	0	0	0	0	0	0	0	0	0
alagoado	5	alagoado5	surface	exposed	0	0	0	0	0	0	0	0	0	0	0	0	0	0	0	0	0	0	0	0	0	0	0
alagoado	6	alagoado6	surface	exposed	1	1	0	0	0	0	0	0	0	0	0	1	0	0	0	0	0	0	0	0	0	0	0
alagoado	7	alagoado7	surface	exposed	0	0	0	0	0	0	0	0	0	0	0	0	0	0	0	0	0	0	0	0	0	0	0
alagoado	8	alagoado8	surface	exposed	0	0	0	0	0	0	0	0	0	0	0	0	0	0	0	0	0	0	0	0	0	0	0
alagoado	9	alagoado9	surface	exposed	1	1	0	0	0	0	0	0	0	0	0	0	1	0	0	0	0	0	0	0	0	0	0
alagoado	10	alagoado10	surface	exposed	0	0	0	0	0	0	0	0	0	0	0	0	0	0	0	0	0	0	0	0	0	0	0
alagoado	1	alagoado1	underground	exposed	0	0	0	0	0	0	0	0	0	0	0	0	0	0	0	0	0	0	0	0	0	0	0
alagoado	2	alagoado2	underground	exposed	0	0	0	0	0	0	0	0	0	0	0	0	0	0	0	0	0	0	0	0	0	0	0
alagoado	3	alagoado3	underground	exposed	0	0	0	0	0	0	0	0	0	0	0	0	0	0	0	0	0	0	0	0	0	0	0
alagoado	4	alagoado4	underground	exposed	0	0	0	0	0	0	0	0	0	0	0	0	0	0	0	0	0	0	0	0	0	0	0
alagoado	5	alagoado5	underground	exposed	0	0	0	0	0	0	0	0	0	0	0	0	0	0	0	0	0	0	0	0	0	0	0
alagoado	6	alagoado6	underground	exposed	0	0	0	0	0	0	0	0	0	0	0	0	0	0	0	0	0	0	0	0	0	0	0
alagoado	7	alagoado7	underground	exposed	0	0	0	0	0	0	0	0	0	0	0	0	0	0	0	0	0	0	0	0	0	0	0
alagoado	8	alagoado8	underground	exposed	0	0	0	0	0	0	0	0	0	0	0	0	0	0	0	0	0	0	0	0	0	0	0
alagoado	9	alagoado9	underground	exposed	0	0	0	0	0	0	0	0	0	0	0	0	0	0	0	0	0	0	0	0	0	0	0
alagoado	10	alagoado10	underground	exposed	1	2	0	0	0	1	0	0	0	0	0	0	0	0	0	0	1	0	0	0	0	0	0
alagoado	1	alagoado1	surface	shaded	1	5	0	0	0	0	0	0	4	0	0	0	0	0	0	0	1	0	0	0	0	0	0
alagoado	2	alagoado2	surface	shaded	2	7	1	0	0	1	0	0	5	0	0	0	0	0	0	0	0	0	0	0	0	0	0
alagoado	3	alagoado3	surface	shaded	5	8	0	0	0	1	1	0	4	0	0	0	0	0	0	0	1	0	0	0	1	0	0
alagoado	4	alagoado4	surface	shaded	5	11	0	0	0	0	0	3	6	0	0	0	0	0	0	0	1	0	0	0	0	1	0
alagoado	5	alagoado5	surface	shaded	3	5	1	0	0	0	0	0	0	2	0	2	0	0	0	0	0	0	0	0	0	0	0
alagoado	6	alagoado6	surface	shaded	1	3	1	0	0	0	0	0	1	0	0	1	0	0	0	0	0	0	0	0	0	0	0
alagoado	7	alagoado7	surface	shaded	3	8	0	0	0	0	0	0	5	0	0	0	3	0	0	0	0	0	0	0	0	0	0
alagoado	8	alagoado8	surface	shaded	4	4	0	0	0	1	0	1	1	0	0	0	0	0	0	0	0	0	0	0	0	0	1
alagoado	9	alagoado9	surface	shaded	4	4	0	0	0	1	0	0	0	0	0	1	0	0	0	0	1	0	0	0	0	1	0
alagoado	10	alagoado10	surface	shaded	2	5	0	0	0	1	0	0	2	0	0	0	0	0	0	0	2	0	0	0	0	0	0
alagoado	1	alagoado1	underground	shaded	2	5	0	0	0	0	0	0	2	0	0	0	3	0	0	0	0	0	0	0	0	0	0
alagoado	2	alagoado2	underground	shaded	1	1	0	0	0	1	0	0	0	0	0	0	0	0	0	0	0	0	0	0	0	0	0
alagoado	3	alagoado3	underground	shaded	2	2	0	0	0	1	0	0	0	0	0	0	1	0	0	0	0	0	0	0	0	0	0
alagoado	4	alagoado4	underground	shaded	1	1	0	0	0	0	0	0	0	0	0	0	0	0	0	0	0	0	1	0	0	0	0
alagoado	5	alagoado5	underground	shaded	0	0	0	0	0	0	0	0	0	0	0	0	0	0	0	0	0	0	0	0	0	0	0
alagoado	6	alagoado6	underground	shaded	1	1	0	0	0	1	0	0	0	0	0	0	0	0	0	0	0	0	0	0	0	0	0
alagoado	7	alagoado7	underground	shaded	3	3	0	0	0	1	0	0	1	0	0	1	0	0	0	0	0	0	0	0	0	0	0
alagoado	8	alagoado8	underground	shaded	0	0	0	0	0	0	0	0	0	0	0	0	0	0	0	0	0	0	0	0	0	0	0
alagoado	9	alagoado9	underground	shaded	0	0	0	0	0	0	0	0	0	0	0	0	0	0	0	0	0	0	0	0	0	0	0
alagoado	10	alagoado10	underground	shaded	0	0	0	0	0	0	0	0	0	0	0	0	0	0	0	0	0	0	0	0	0	0	0
britador	18	britador18	surface	exposed	1	1	0	0	0	0	0	0	0	0	0	0	0	0	0	0	0	0	0	0	0	0	0	parecido a cajueiro
britador	18	britador18	underground	exposed	0	0	0	0	0	0	0	0	0	0	0	0	0	0	0	0	0	0	0	0	0	0	0	parecido a cajueiro
britador	18	britador18	surface	shaded	2	3	0	0	0	0	0	0	0	0	0	0	0	0	0	0	0	0	0	0	0	0	0	parecido a cajueiro
britador	18	britador18	underground	shaded	0	0	0	0	0	0	0	0	0	0	0	0	0	0	0	0	0	0	0	0	0	0	0	parecido a cajueiro
catimbau	Juazeiro 1	catimbauJuazeiro 1	surface	exposed	0	0	0	0	0	0	0	0	0	0	0	0	0	0	0	0	0	0	0	0	0	0	0
catimbau	arbusto 2	catimbau arbusto 2	surface	exposed	4	9	0	0	0	2	3	0	0	3	0	0	1	0	0	0	0	0	0	0	0	0	0
catimbau	arbusto 3	catimbauarbusto 3	surface	exposed	1	1	0	0	0	0	0	1	0	0	0	0	0	0	0	0	0	0	0	0	0	0	0
catimbau	arbusto 4	catimbauarbusto 4	surface	exposed	1	0	0	0	0	0	0	0	0	0	0	0	0	0	0	0	0	0	0	2	0	0	0
catimbau	arbusto 5	catimbauarbusto 5	surface	exposed	2	2	0	0	0	0	1	0	1	0	0	0	0	0	0	0	0	0	0	0	0	0	0
catimbau	arvore 6	catimbauarvore 6	surface	exposed	2	3	0	0	0	1	0	0	2	0	0	0	0	0	0	0	0	0	0	0	0	0	0
catimbau	1	catimbau1	surface	exposed	0	0	0	0	0	0	0	0	0	0	0	0	0	0	0	0	0	0	0	0	0	0	0
catimbau	2	catimbau2	surface	exposed	0	0	0	0	0	0	0	0	0	0	0	0	0	0	0	0	0	0	0	0	0	0	0
catimbau	3	catimbau3	surface	exposed	0	0	0	0	0	0	0	0	0	0	0	0	0	0	0	0	0	0	0	0	0	0	0
catimbau	3'	catimbau3'	surface	exposed	0	0	0	0	0	0	0	0	0	0	0	0	0	0	0	0	0	0	0	0	0	0	0
catimbau	4	catimbau4	surface	exposed	2	4	0	0	0	3	0	0	0	0	0	1	0	0	0	0	0	0	0	0	0	0	0
catimbau	6	catimbau6	surface	exposed	1	1	0	0	0	0	0	0	0	1	0	0	0	0	0	0	0	0	0	0	0	0	0
catimbau	7	catimbau7	surface	exposed	1	1	0	0	0	0	0	0	1	0	0	0	0	0	0	0	0	0	0	0	0	0	0
catimbau	8	catimbau8	surface	exposed	0	0	0	0	0	0	0	0	0	0	0	0	0	0	0	0	0	0	0	0	0	0	0
catimbau	Juazeiro 1	catimbauJuazeiro 1	underground	exposed	0	0	0	0	0	0	0	0	0	0	0	0	0	0	0	0	0	0	0	0	0	0	0
catimbau	arbusto 2	catimbau arbusto 2	underground	exposed	1	1	0	0	0	1	0	0	0	0	0	0	0	0	0	0	0	0	0	0	0	0	0
catimbau	arbusto 3	catimbauarbusto 3	underground	exposed	0	0	0	0	0	0	0	0	0	0	0	0	0	0	0	0	0	0	0	0	0	0	0
catimbau	arbusto 4	catimbauarbusto 4	underground	exposed	2	3	0	0	0	2	0	0	0	0	0	0	0	1	0	0	0	0	0	0	0	0	0
catimbau	arbusto 5	catimbauarbusto 5	underground	exposed	2	2	0	0	0	0	0	0	0	0	0	0	1	1	0	0	0	0	0	0	0	0	0
catimbau	arvore 6	catimbauarvore 6	underground	exposed	0	0	0	0	0	0	0	0	0	0	0	0	0	0	0	0	0	0	0	0	0	0	0
catimbau	1	catimbau1	underground	exposed	0	0	0	0	0	0	0	0	0	0	0	0	0	0	0	0	0	0	0	0	0	0	0
catimbau	2	catimbau2	underground	exposed	0	0	0	0	0	0	0	0	0	0	0	0	0	0	0	0	0	0	0	0	0	0	0
catimbau	3	catimbau3	underground	exposed	0	0	0	0	0	0	0	0	0	0	0	0	0	0	0	0	0	0	0	0	0	0	0
catimbau	3'	catimbau3'	underground	exposed	0	0	0	0	0	0	0	0	0	0	0	0	0	0	0	0	0	0	0	0	0	0	0
catimbau	4	catimbau4	underground	exposed	0	0	0	0	0	0	0	0	0	0	0	0	0	0	0	0	0	0	0	0	0	0	0
catimbau	6	catimbau6	underground	exposed	0	0	0	0	0	0	0	0	0	0	0	0	0	0	0	0	0	0	0	0	0	0	0
catimbau	7	catimbau7	underground	exposed	0	0	0	0	0	0	0	0	0	0	0	0	0	0	0	0	0	0	0	0	0	0	0
catimbau	8	catimbau8	underground	exposed	0	0	0	0	0	0	0	0	0	0	0	0	0	0	0	0	0	0	0	0	0	0	0
catimbau	arbusto 2	catimbau arbusto 2	surface	shaded	5	8	0	0	0	1	0	0	3	0	2	0	1	0	1	0	0	0	0	0	0	0	0
catimbau	Juazeiro 1	catimbauJuazeiro 1	surface	shaded	5	13	2	0	0	0	1	0	0	4	3	3	0	0	0	0	0	0	0	0	0	0	0
catimbau	arbusto 3	catimbauarbusto 3	surface	shaded	0	0	0	0	0	0	0	0	0	0	0	0	0	0	0	0	0	0	0	0	0	0	0
catimbau	arbusto 4	catimbauarbusto 4	surface	shaded	10	21	0	0	0	2	8	1	1	0	1	4	1	0	1	1	1	0	0	0	0	0	0
catimbau	arbusto 5	catimbauarbusto 5	surface	shaded	7	18	0	0	0	2	2	1	0	1	0	10	1	0	0	0	1	0	0	0	0	0	0
catimbau	arvore 6	catimbauarvore 6	surface	shaded	3	4	1	0	0	2	0	0	0	0	0	1	0	0	0	0	0	0	0	0	0	0	0
catimbau	1	catimbau1	surface	shaded	3	3	1	0	0	1	0	1	0	0	0	0	0	0	0	0	0	0	0	0	0	0	0
catimbau	2	catimbau2	surface	shaded	4	20	0	0	0	4	0	0	3	2	0	11	0	0	0	0	0	0	0	0	0	0	0
catimbau	3	catimbau3	surface	shaded	3	4	0	0	0	1	0	0	0	1	0	2	0	0	0	0	0	0	0	0	0	0	0
catimbau	3'	catimbau3'	surface	shaded	2	2	0	0	0	0	0	0	1	0	0	0	0	0	0	1	0	0	0	0	0	0	0
catimbau	4	catimbau4	surface	shaded	4	7	0	0	0	3	0	1	1	2	0	0	0	0	0	0	0	0	0	0	0	0	0
catimbau	6	catimbau6	surface	shaded	2	3	0	0	0	2	0	0	1	0	0	0	0	0	0	0	0	0	0	0	0	0	0
catimbau	7	catimbau7	surface	shaded	2	3	0	0	0	0	1	0	0	0	2	0	0	0	0	0	0	0	0	0	0	0	0
catimbau	8	catimbau8	surface	shaded	1	9	0	0	0	0	0	0	9	0	0	0	0	0	0	0	0	0	0	0	0	0	0
catimbau	arbusto 2	catimbau arbusto 2	underground	shaded	3	5	0	0	0	1	0	0	0	1	0	0	0	3	0	0	0	0	0	0	0	0	0
catimbau	Juazeiro 1	catimbauJuazeiro 1	underground	shaded	2	2	0	1	0	0	0	0	1	1	0	0	0	0	0	0	0	0	0	0	0	0	0
catimbau	arbusto 3	catimbauarbusto 3	underground	shaded	2	2	0	0	1	0	0	0	1	0	0	0	0	0	0	0	0	0	0	0	0	0	0
catimbau	arbusto 4	catimbauarbusto 4	underground	shaded	1	2	0	0	0	0	0	0	2	0	0	0	0	0	0	0	0	0	0	0	0	0	0
catimbau	arbusto 5	catimbauarbusto 5	underground	shaded	2	3	0	0	0	1	0	0	0	0	0	2	0	0	0	0	0	0	0	0	0	0	0
catimbau	arvore 6	catimbauarvore 6	underground	shaded	2	2	0	0	0	1	0	0	0	0	0	0	0	0	0	0	0	1	0	0	0	0	0
catimbau	1	catimbau1	underground	shaded	0	0	0	0	0	0	0	0	0	0	0	0	0	0	0	0	0	0	0	0	0	0	0
catimbau	2	catimbau2	underground	shaded	3	17	0	0	0	10	0	0	0	6	0	0	0	0	1	0	0	0	0	0	0	0	0
catimbau	3	catimbau3	underground	shaded	3	5	2	0	0	2	1	0	0	0	0	0	0	0	0	0	0	0	0	0	0	0	0
catimbau	3'	catimbau3'	underground	shaded	0	0	0	0	0	0	0	0	0	0	0	0	0	0	0	0	0	0	0	0	0	0	0
catimbau	4	catimbau4	underground	shaded	3	5	0	0	0	0	0	0	0	2	0	0	0	0	2	0	1	0	0	0	0	0	0
catimbau	6	catimbau6	underground	shaded	0	0	0	0	0	0	0	0	0	0	0	0	0	0	0	0	0	0	0	0	0	0	0
catimbau	7	catimbau7	underground	shaded	2	2	0	0	0	0	0	0	1	0	0	0	0	0	1	0	0	0	0	0	0	0	0
catimbau	8	catimbau8	underground	shaded	1	2	0	0	0	0	0	0	2	0	0	0	0	0	0	0	0	0	0	0	0	0	0
gameleira	13	gameleira13	surface	exposed	0	0	0	0	0	0	0	0	0	0	0	0	0	0	0	0	0	0	0	0	0	0	0	carrasco
gameleira	14	gameleira14	surface	exposed	0	0	0	0	0	0	0	0	0	0	0	0	0	0	0	0	0	0	0	0	0	0	0	cajueiro
gameleira	15	gameleira15	surface	exposed	0	0	0	0	0	0	0	0	0	0	0	0	0	0	0	0	0	0	0	0	0	0	0	cajueiro
gameleira	15	gameleira15	surface	exposed	0	0	0	0	0	0	0	0	0	0	0	0	0	0	0	0	0	0	0	0	0	0	0	carrasco
gameleira	16	gameleira16	surface	exposed	2	4	0	0	0	0	0	0	0	0	0	0	0	0	0	0	0	0	0	0	0	0	0	jatob
gameleira	17	gameleira17	surface	exposed	0	0	0	0	0	0	0	0	0	0	0	0	0	0	0	0	0	0	0	0	0	0	0	carrasco
gameleira	13	gameleira13	underground	exposed	0	0	0	0	0	0	0	0	0	0	0	0	0	0	0	0	0	0	0	0	0	0	0	carrasco
gameleira	14	gameleira14	underground	exposed	0	0	0	0	0	0	0	0	0	0	0	0	0	0	0	0	0	0	0	0	0	0	0	cajueiro
gameleira	15	gameleira15	underground	exposed	0	0	0	0	0	0	0	0	0	0	0	0	0	0	0	0	0	0	0	0	0	0	0	cajueiro
gameleira	15	gameleira15	underground	exposed	0	0	0	0	0	0	0	0	0	0	0	0	0	0	0	0	0	0	0	0	0	0	0	carrasco
gameleira	16	gameleira16	underground	exposed	0	0	0	0	0	0	0	0	0	0	0	0	0	0	0	0	0	0	0	0	0	0	0	carrasco
gameleira	17	gameleira17	underground	exposed	0	0	0	0	0	0	0	0	0	0	0	0	0	0	0	0	0	0	0	0	0	0	0	carrasco
gameleira	13	gameleira13	surface	shaded	3	4	0	0	0	0	0	0	0	0	0	0	0	0	0	0	0	0	0	0	0	0	0	carrasco
gameleira	14	gameleira14	surface	shaded	6	22	0	0	0	0	0	0	0	0	0	0	0	0	0	0	0	0	0	0	0	0	0	cajueiro
gameleira	15	gameleira15	surface	shaded	3	4	0	0	0	0	0	0	0	0	0	0	0	0	0	0	0	0	0	0	0	0	0	cajueiro
gameleira	15'	gameleira15'	surface	shaded	1	1	0	0	0	0	0	0	0	0	0	0	0	0	0	0	0	0	0	0	0	0	0	carrasco
gameleira	16	gameleira16	surface	shaded	4	7	0	0	0	0	0	0	0	0	0	0	0	0	0	0	0	0	0	0	0	0	0	jatob
gameleira	17	gameleira17	surface	shaded	0	0	0	0	0	0	0	0	0	0	0	0	0	0	0	0	0	0	0	0	0	0	0	carrasco
gameleira	13	gameleira13	underground	shaded	0	0	0	0	0	0	0	0	0	0	0	0	0	0	0	0	0	0	0	0	0	0	0	carrasco
gameleira	14	gameleira14	underground	shaded	3	17	0	0	0	0	0	0	0	0	0	0	0	0	0	0	0	0	0	0	0	0	0	cajueiro
gameleira	15	gameleira15	underground	shaded	3	5	0	0	0	0	0	0	0	0	0	0	0	0	0	0	0	0	0	0	0	0	0	cajueiro
gameleira	15'	gameleira15'	underground	shaded	0	0	0	0	0	0	0	0	0	0	0	0	0	0	0	0	0	0	0	0	0	0	0	carrasco
gameleira	16	gameleira16	underground	shaded	3	5	0	0	0	0	0	0	0	0	0	0	0	0	0	0	0	0	0	0	0	0	0	jatob
gameleira	17	gameleira17	underground	shaded	0	0	0	0	0	0	0	0	0	0	0	0	0	0	0	0	0	0	0	0	0	0	0	carrasco
pedravermelha	19	pedravermelha19	surface	exposed	1	1	0	0	0	0	0	0	0	0	0	0	0	0	0	0	0	0	0	0	0	0	0	parecido a cajueiro
pedravermelha	19	pedravermelha19	underground	exposed	0	0	0	0	0	0	0	0	0	0	0	0	0	0	0	0	0	0	0	0	0	0	0	parecido a cajueiro
pedravermelha	19	pedravermelha19	surface	shaded	2	3	0	0	0	0	0	0	0	0	0	0	0	0	0	0	0	0	0	0	0	0	0	parecido a cajueiro
pedravermelha	19	pedravermelha19	underground	shaded	2	2	0	0	0	0	0	0	0	0	0	0	0	0	0	0	0	0	0	0	0	0	0	parecido a cajueiro
vacaria	20	vacaria20	surface	exposed	0	0	0	0	0	0	0	0	0	0	0	0	0	0	0	0	0	0	0	0	0	0	0	diurema preta
vacaria	20	vacaria20	underground	exposed	0	0	0	0	0	0	0	0	0	0	0	0	0	0	0	0	0	0	0	0	0	0	0	diurema preta
vacaria	20	vacaria20	surface	shaded	1	9	0	0	0	0	0	0	0	0	0	0	0	0	0	0	0	0	0	0	0	0	0	diurema preta
vacaria	20	vacaria20	underground	shaded	1	1	0	0	0	0	0	0	0	0	0	0	0	0	0	0	0	0	0	0	0	0	0	diurema preta

## Sheet: abgym
habitat	soil type	plotsize	ds.foss	ds.lac	totdens	site	abundance	sp	morph	obs	plot
shaded	sand	141.372	0.02122	0	0.02122	alagoado	3	C.leiolepis	BSLM		1
shaded	sand	169.646	0.00589	0.00589	0.01179	alagoado	1	C.leiolepis	BSLM		2
exposed	sand	125.664	0	0	0	alagoado	0	C.leiolepis	BSLM		3
shaded	sand	75.3984	0.03979	0.02653	0.06631	alagoado	3	C.leiolepis	BSLM		4
exposed	sand	113.098	0	0	0	alagoado	0	C.leiolepis	BSLM		5
exposed	sand	113.098	0	0	0	alagoado	0	C.leiolepis	BSLM		6
shaded	sand	282.744	0.01415	0.01061	0.02476	alagoado	3	C.leiolepis	BSLM		7
shaded	sand	175.93	0	0.00568	0.00568	alagoado	0	C.leiolepis	BSLM		8
exposed	sand	94.248	0	0	0	alagoado	0	C.leiolepis	BSLM		9
shaded	sand	376.992	0.00796	0.00531	0.01326	alagoado	3	C.leiolepis	BSLM		10
exposed	sand	125.664	0	0	0	alagoado	0	C.leiolepis	BSLM		11
exposed	sand	122.522	0	0	0	alagoado	0	C.leiolepis	BSLM		12
shaded	sand	138.23	0.0217	0.00723	0.02894	alagoado	3	C.leiolepis	BSLM		13
shaded	sand	113.098	0.04421	0	0.04421	alagoado	5	C.leiolepis	BSLM	sand layer	14
shaded	sand	153.938	0.03898	0	0.03898	alagoado	6	C.leiolepis	BSLM	sand layer	15
shaded	sand	28.2744	0.03537	0	0.03537	alagoado	0	C.leiolepis	BSLM	sand layer	16
exposed	sand	28.2744	0	0	0	alagoado	0	C.leiolepis	BSLM	sand layer	17
exposed	sand	28.2744	0	0	0	alagoado	0	C.leiolepis	BSLM	sand layer	18
exposed	sand	56.5488	0	0	0	alagoado	0	C.leiolepis	BSLM	sand layer	19
shaded	sand	530.93	0.04332	0	0.04332	alagoado	20	C.leiolepis	BSLM	sand layer	20
exposed	sand	207.346	0	0	0	alagoado	0	C.leiolepis	BSLM	sand layer	21
shaded	sand	28.2744	0	0	0	alagoado	0	C.leiolepis	BSLM	sand layer	22
shaded	sand	28.2744	0.03537	0	0.03537	alagoado	1	C.leiolepis	BSLM		23
shaded	sand	12.5664	0	0	0	alagoado	0	C.leiolepis	BSLM		24
exposed	sand	78.54	0	0	0	alagoado	0	C.leiolepis	BSLM		25
shaded	sand	87.9648	0	0.01137	0.01137	alagoado	0	C.leiolepis	BSLM		26
shaded	sand	25.1328	0.03979	0	0.03979	alagoado	1	C.leiolepis	BSLM		27
shaded	sand	37.6992	0	0.07958	0.07958	alagoado	0	C.leiolepis	BSLM		28
exposed	sand	18.8496	0	0	0	alagoado	0	C.leiolepis	BSLM		29
exposed	sand	37.6992	0	0	0	alagoado	0	C.leiolepis	BSLM		30
exposed	sand	78.54	0	0	0	alagoado	0	C.leiolepis	BSLM		31
shaded	sand	31.416	0	0.06366	0.06366	alagoado	0	C.leiolepis	BSLM		32
shaded	sand	28.2744	0.03537	0.07074	0.1061	alagoado	0	C.leiolepis	BSLM		33
exposed	sand	50.2656	0	0	0	alagoado	0	C.leiolepis	BSLM		34
shaded	sand	109.956	0.05457	0.00909	0.06366	alagoado	4	C.leiolepis	BSLM	sand layer	35
shaded	sand	188.496	0	0.01061	0.01061	alagoado	0	C.leiolepis	BSLM	sand layer	36
exposed	sand	226.195	0	0	0	alagoado	0	C.leiolepis	BSLM	sand layer	37
exposed	sand	141.372	0	0	0	alagoado	0	C.leiolepis	BSLM	sand layer	38
exposed	sand	75.3984	0.03979	0.01326	0.05305	alagoado	3	C.leiolepis	BSLM	sand layer	39
shaded	sand	50.2656	0	0	0	alagoado	0	C.leiolepis	BSLM	sand layer	40
exposed	sand	62.832	0	0	0	alagoado	0	C.leiolepis	BSLM	sand layer	41
exposed	sand	75.3984	0	0	0	alagoado	0	C.leiolepis	BSLM	sand layer	42
shaded	sand	94.248	0.01061	0	0.01061	alagoado	1	C.leiolepis	BSLM	sand layer	43
shaded	sand	131.947	0	0	0	alagoado	0	C.leiolepis	BSLM	sand layer	44
exposed	sand	62.832	0	0	0	alagoado	0	C.leiolepis	BSLM	sand layer	45
exposed	sand	94.248	0	0	0	alagoado	0	C.leiolepis	BSLM	sand layer	46
shaded	no sand	94.248	0	0	0	alagoado	0	C.leiolepis	BSLM	no sand	47
shaded	no sand	109.956	0.00909	0	0.00909	alagoado	0	C.leiolepis	BSLM	no sand	48
shaded	no sand	50.2656	0	0	0	alagoado	0	C.leiolepis	BSLM	no sand	49
shaded	no sand	47.124	0	0	0	alagoado	0	C.leiolepis	BSLM	no sand	50
exposed	no sand	78.54	0	0	0	alagoado	0	C.leiolepis	BSLM	no sand	51
exposed	no sand	56.5488	0	0	0	alagoado	0	C.leiolepis	BSLM	no sand	52
shaded	no sand	78.54	0.02546	0.02546	0.05093	alagoado	0	C.leiolepis	BSLM	no sand	53
shaded	no sand	201.062	0.00497	0.00995	0.01492	alagoado	0	C.leiolepis	BSLM	no sand	54
exposed	no sand	94.248	0	0	0	alagoado	0	C.leiolepis	BSLM	no sand	55
exposed	no sand	245.045	0	0	0	alagoado	0	C.leiolepis	BSLM	no sand	56
shaded	no sand	62.832	0.04775	0.03183	0.07958	alagoado	3	C.leiolepis	BSLM	sand layer	57
shaded	no sand	197.921	0.06063	0.02526	0.08589	alagoado	12	C.leiolepis	BSLM	sand layer	58
exposed	no sand	94.248	0	0	0	alagoado	0	C.leiolepis	BSLM	sand layer	59
shaded	no sand	50.2656	0.03979	0.05968	0.09947	alagoado	2	C.leiolepis	BSLM	sand layer	60
exposed	sand	56.5488	0	0	0	alagoado	0	C.leiolepis	BSLM	sand layer	61
shaded	sand	251.328	0.01989	0.00398	0.02387	alagoado	5	C.leiolepis	BSLM	sand layer	62
shaded	sand	131.947	0.06821	0.00758	0.07579	alagoado	7	C.leiolepis	BSLM	sand layer	63
exposed	no sand	109.956	0.00909	0	0.00909	alagoado	0	C.leiolepis	BSLM	sand layer	64
exposed	sand	87.9648	0	0	0	alagoado	0	C.leiolepis	BSLM	sand layer	65
shaded	sand	50.2656	0.01989	0.03979	0.05968	alagoado	1	C.leiolepis	BSLM	sand layer	66
shaded	sand	75.3984	0.06631	0.01326	0.07958	alagoado	5	C.leiolepis	BSLM	sand layer	67
shaded	sand	50.2656	0.13926	0.03979	0.17905	alagoado	7	C.leiolepis	BSLM	sand layer	68
exposed	sand	37.6992	0	0	0	alagoado	0	C.leiolepis	BSLM	sand layer	69
exposed	sand	37.6992	0	0	0	alagoado	0	C.leiolepis	BSLM	sand layer	70
exposed	sand	56.5488	0	0	0	alagoado	0	C.leiolepis	BSLM	sand layer	71
shaded	sand	201.062	0.00995	0	0.00995	alagoado	2	C.leiolepis	BSLM	no sand	72
shaded	sand	62.832	0	0	0	alagoado	0	C.leiolepis	BSLM	no sand	73
shaded	sand	87.9648	0	0	0	alagoado	0	C.leiolepis	BSLM	no sand	74
shaded	sand	87.9648	0	0	0	alagoado	0	C.leiolepis	BSLM	no sand	75
shaded	sand	50.2656	0.01989	0.01989	0.03979	alagoado	1	C.leiolepis	BSLM	sand	76
shaded	sand	28.2744	0.03537	0.1061	0.14147	alagoado	1	C.leiolepis	BSLM	sand	77
shaded	sand	47.124	0.02122	0.02122	0.04244	alagoado	1	C.leiolepis	BSLM	sand	78
shaded	sand	78.54	0	0	0	alagoado	0	C.leiolepis	BSLM	no sand	79
shaded	sand	10.0531	0	0	0	catimbau	0	C.leiolepis	BSLM	sand	80
exposed	sand	65.6594	0	0	0	catimbau	0	C.leiolepis	BSLM	sand	81
exposed	sand	34.212	0	0	0	catimbau	0	C.leiolepis	BSLM	sand	82
exposed	sand	32.0443	0	0	0	catimbau	0	C.leiolepis	BSLM	sand	83
exposed	sand	22.054	0	0	0	catimbau	0	C.leiolepis	BSLM	sand	84
exposed	sand	91.6091	0	0	0	catimbau	0	C.leiolepis	BSLM	sand	85
shaded	sand	20.4204	0	0	0	catimbau	0	C.leiolepis	BSLM	sand	86
shaded	sand	7.75975	0.12887	0	0.12887	catimbau	0	C.leiolepis	BSLM	sand	87
shaded	sand	32.2014	0	0.03105	0.03105	catimbau	0	C.leiolepis	BSLM	sand	88
shaded	sand	164.934	0.00606	0	0.00606	catimbau	0	C.leiolepis	BSLM	sand	89
exposed	sand	153.153	0	0	0	catimbau	0	C.leiolepis	BSLM	sand	90
exposed	sand	47.501	0	0	0	catimbau	0	C.leiolepis	BSLM	sand	91
shaded	sand	55.7634	0.01793	0.03587	0.0538	catimbau	0	C.leiolepis	BSLM	sand	92
exposed	sand	24.1275	0	0	0	catimbau	0	C.leiolepis	BSLM	sand	93
shaded	sand	73.2307	0	0.02731	0.02731	catimbau	0	C.leiolepis	BSLM	sand	94
exposed	sand	118.187	0	0	0	catimbau	0	C.leiolepis	BSLM	sand	95
exposed	sand	42.5058	0	0	0	catimbau	0	C.leiolepis	BSLM	sand	96
exposed	sand	98.0179	0	0	0	catimbau	0	C.leiolepis	BSLM	sand	97
shaded	sand	77.519	0.0129	0.0387	0.0516	catimbau	0	C.leiolepis	BSLM	sand	98
shaded	sand	38.4846	0.02598	0.02598	0.05197	catimbau	0	C.leiolepis	BSLM	sand	99
shaded	sand	137.366	0	0.00728	0.00728	catimbau	0	C.leiolepis	BSLM	sand	100
exposed	sand	113.098	0	0	0	catimbau	0	C.leiolepis	BSLM	sand	101
exposed	sand	72.0683	0	0	0	catimbau	0	C.leiolepis	BSLM	sand	102
exposed	sand	81.8073	0	0	0	catimbau	0	C.leiolepis	BSLM	sand	103
shaded	sand	68.0471	0	0	0	catimbau	0	C.leiolepis	BSLM	sand	104
exposed	sand	7.0686	0	0	0	catimbau	0	C.leiolepis	BSLM	sand	105
shaded	sand	135.717	0	0.00737	0.00737	catimbau	0	C.leiolepis	BSLM	sand	106
shaded	sand	10.6814	0.09362	0	0.09362	catimbau	0	C.leiolepis	BSLM	sand	107
exposed	sand	40.7151	0	0	0	catimbau	0	C.leiolepis	BSLM	sand	108
exposed	sand	95.5046	0	0	0	catimbau	0	C.leiolepis	BSLM	sand	109
exposed	sand	11.781	0	0	0	catimbau	0	C.leiolepis	BSLM	sand	110
shaded	sand	15.8965	0	0	0	catimbau	0	C.leiolepis	BSLM	sand	111
exposed	sand	18.7868	0	0	0	catimbau	0	C.leiolepis	BSLM	sand	112
exposed	sand	26.9549	0	0	0	catimbau	0	C.leiolepis	BSLM	sand	113
exposed	sand	12.0637	0	0	0	catimbau	0	C.leiolepis	BSLM	sand	114
shaded	sand	93.117	0	0.02148	0.02148	catimbau	0	C.leiolepis	BSLM	sand	115
exposed	sand	12.4407	0	0	0	catimbau	0	C.leiolepis	BSLM	sand	116
exposed	sand	82.3728	0	0	0	catimbau	0	C.leiolepis	BSLM	sand	117
shaded	sand	9.6133	0	0.10402	0.10402	catimbau	0	C.leiolepis	BSLM	sand	118
shaded	sand	25.1328	0	0	0	catimbau	0	C.leiolepis	BSLM	sand	119
shaded	sand	23.562	0	0.04244	0.04244	catimbau	0	C.leiolepis	BSLM	sand	120
shaded	sand	30.1594	0	0	0	catimbau	0	C.leiolepis	BSLM	sand	121
exposed	sand	42.7258	0	0	0	catimbau	0	C.leiolepis	BSLM	sand	122
exposed	sand	58.1196	0	0	0	catimbau	0	C.leiolepis	BSLM	sand	123
exposed	sand	32.0443	0	0	0	catimbau	0	C.leiolepis	BSLM	sand	124
exposed	sand	80.582	0	0	0	catimbau	0	C.leiolepis	BSLM	sand	125
shaded	sand	9.89604	0.10105	0	0.10105	catimbau	0	C.leiolepis	BSLM	sand	126
shaded	sand	6.78586	0.14737	0	0.14737	catimbau	0	C.leiolepis	BSLM	sand	127
shaded	sand	38.6998	0.05168	0.05168	0.10336	catimbau	0	C.leiolepis	BSLM	sand	128
exposed	sand	67.7329	0	0	0	catimbau	0	C.leiolepis	BSLM	sand	129
exposed	sand	34.5576	0	0	0	catimbau	0	C.leiolepis	BSLM	sand	130
exposed	sand	15.708	0	0	0	catimbau	0	C.leiolepis	BSLM	sand	131
exposed	sand	27.0492	0	0	0	catimbau	0	C.leiolepis	BSLM	sand	132
shaded	sand	75.3984	0	0.02653	0.02653	catimbau	0	C.leiolepis	BSLM	sand	133
shaded	sand	92.4887	0	0	0	catimbau	0	C.leiolepis	BSLM	sand	134
shaded	sand	12.7235	0.23578	0	0.23578	catimbau	0	C.leiolepis	BSLM	sand	135
shaded	sand	19.7921	0.10105	0.05053	0.15158	catimbau	0	C.leiolepis	BSLM	sand	136
exposed	sand	25.1328	0	0	0	catimbau	0	C.leiolepis	BSLM	sand	137
exposed	sand	45.082	0	0	0	catimbau	0	C.leiolepis	BSLM	sand	138
exposed	sand	34.0864	0	0	0	catimbau	0	C.leiolepis	BSLM	sand	139
exposed	sand	16.9646	0	0	0	catimbau	0	C.leiolepis	BSLM	sand	140
exposed	sand	17.8129	0	0	0	catimbau	0	C.leiolepis	BSLM	sand	141
exposed	sand	8.16816	0	0	0	catimbau	0	C.leiolepis	BSLM	sand	142
exposed	sand	16.0222	0	0	0	catimbau	0	C.leiolepis	BSLM	sand	143
shaded	sand	22.8708	0	0.04372	0.04372	catimbau	0	C.leiolepis	BSLM	sand	144
shaded	sand	47.6895	0	0	0	catimbau	0	C.leiolepis	BSLM	sand	145
exposed	sand	17.97	0	0	0	catimbau	0	C.leiolepis	BSLM	sand	146
exposed	sand	7.2571	0	0	0	catimbau	0	C.leiolepis	BSLM	sand	147
exposed	sand	15.8337	0	0	0	catimbau	0	C.leiolepis	BSLM	sand	148
shaded	sand	113.098	0	0.02653	0.02653	catimbau	0	C.leiolepis	BSLM	sand	149
shaded	sand	19.635	0.10186	0	0.10186	catimbau	0	C.leiolepis	BSLM	sand	150
shaded	sand	21.2372	0.04709	0	0.04709	catimbau	0	C.leiolepis	BSLM	sand	151
exposed	sand	6.40886	0	0	0	catimbau	0	C.leiolepis	BSLM	sand	152
exposed	sand	17.1531	0	0	0	catimbau	0	C.leiolepis	BSLM	sand	153
exposed	sand	28.2744	0	0	0	catimbau	0	C.leiolepis	BSLM	sand	154
exposed	sand	16.1164	0	0	0	catimbau	0	C.leiolepis	BSLM	sand	155
exposed	sand	23.562	0	0	0	catimbau	0	C.leiolepis	BSLM	sand	156
shaded	sand	56.0776	0.03566	0.01783	0.0535	catimbau	0	C.leiolepis	BSLM	sand	157
shaded	sand	33.7094	0.05933	0	0.05933	catimbau	0	C.leiolepis	BSLM	sand	158
exposed	sand	15.2053	0	0	0	catimbau	0	C.leiolepis	BSLM	sand	159
exposed	sand	16.4934	0	0	0	catimbau	0	C.leiolepis	BSLM	sand	160
exposed	sand	38.3589	0	0	0	catimbau	0	C.leiolepis	BSLM	sand	161
exposed	sand	19.7921	0	0	0	catimbau	0	C.leiolepis	BSLM	sand	162
exposed	sand	4.5239	0	0	0	catimbau	0	C.leiolepis	BSLM	sand	163
shaded	sand	58.0568	0.03445	0.0689	0.10335	catimbau	0	C.leiolepis	BSLM	sand	164
shaded	sand	103.673	0.01929	0	0.01929	catimbau	0	C.leiolepis	BSLM	sand	165
exposed	sand	13.1947	0	0	0	catimbau	0	C.leiolepis	BSLM	sand	166
exposed	sand	42.7258	0	0	0	catimbau	0	C.leiolepis	BSLM	sand	167
exposed	no sand	7.0686	0	0	0	catimbau	0	C.leiolepis	BSLM	sand	168
shaded	no sand	10.5558	0	0.09473	0.09473	catimbau	0	C.leiolepis	BSLM	sand	169
shaded	no sand	18.7868	0.05323	0	0.05323	catimbau	0	C.leiolepis	BSLM	sand	170
shaded	no sand	30.0651	0.03326	0.03326	0.06652	catimbau	0	C.leiolepis	BSLM	sand	171
shaded	no sand	88.3418	0.02264	0	0.02264	catimbau	0	C.leiolepis	BSLM	sand	172
exposed	no sand	11.3098	0	0	0	catimbau	0	C.leiolepis	BSLM	sand	173
shaded	no sand	15.2682	0.13099	0.0655	0.19649	catimbau	0	C.leiolepis	BSLM	sand	174
exposed	no sand	6.03187	0	0	0	catimbau	0	C.leiolepis	BSLM	sand	175
exposed	no sand	34.7775	0	0	0	catimbau	0	C.leiolepis	BSLM	sand	176
exposed	no sand	11.8752	0	0	0	catimbau	0	C.leiolepis	BSLM	sand	177
shaded	no sand	23.7505	0	0.08421	0.08421	catimbau	0	C.leiolepis	BSLM	sand	178
exposed	no sand	15.8337	0	0	0	catimbau	0	C.leiolepis	BSLM	sand	179
exposed	no sand	2.82744	0	0	0	catimbau	0	C.leiolepis	BSLM	sand	180
shaded	no sand	18.7868	0.05323	0.05323	0.10646	catimbau	0	C.leiolepis	BSLM	sand	181
exposed	no sand	11.3098	0	0	0	catimbau	0	C.leiolepis	BSLM	sand	182
shaded	no sand	6.44895	0	0.15506	0.15506	Gameleira	0	C.leiolepis	BSLM	no sand	183
shaded	no sand	3.55424	0	0	0	Gameleira	0	C.leiolepis	BSLM	no sand	184
shaded	no sand	3.84354	0	0	0	Gameleira	0	C.leiolepis	BSLM	no sand	185
shaded	no sand	7.22342	0	0.13844	0.13844	Gameleira	0	C.leiolepis	BSLM	no sand	186
exposed	no sand	8.3436	0	0	0	Gameleira	0	C.leiolepis	BSLM	no sand	187
exposed	no sand	2.25345	0	0	0	Gameleira	0	C.leiolepis	BSLM	no sand	188
exposed	no sand	2.7543	0	0	0	Gameleira	0	C.leiolepis	BSLM	no sand	189
exposed	no sand	95.8188	0	0	0	Gameleira	0	C.leiolepis	BSLM	no sand	190
shaded	no sand	197.921	0	0	0	Gameleira	0	C.leiolepis	BSLM	no sand	191
exposed	no sand	169.646	0	0	0	Gameleira	0	C.leiolepis	BSLM	no sand	192
exposed	no sand	226.195	0	0	0	Gameleira	0	C.leiolepis	BSLM	no sand	193
exposed	no sand	197.921	0	0	0	Gameleira	0	C.leiolepis	BSLM	no sand	194
shaded	no sand	117.339	0	0.01704	0.01704	Gameleira	0	C.leiolepis	BSLM	no sand	195
shaded	no sand	173.165	0	0	0	Gameleira	0	C.leiolepis	BSLM	no sand	196
shaded	no sand	268.607	0	0	0	Gameleira	0	C.leiolepis	BSLM	no sand	197
shaded	no sand	226.195	0	0.00442	0.00442	Gameleira	0	C.leiolepis	BSLM	no sand	198
shaded	no sand	50.2656	0	0	0	Gameleira	0	C.leiolepis	BSLM	no sand	199
shaded	no sand	113.098	0	0.01768	0.01768	Gameleira	0	C.leiolepis	BSLM	no sand	200
shaded	no sand	107.348	0	0.00932	0.00932	Gameleira	0	C.leiolepis	BSLM	no sand	201
shaded	no sand	120.763	0	0.01656	0.01656	Gameleira	0	C.leiolepis	BSLM	no sand	202
exposed	no sand	178.883	0	0	0	Gameleira	0	C.leiolepis	BSLM	no sand	203
exposed	no sand	133.832	0	0	0	Gameleira	0	C.leiolepis	BSLM	no sand	204
exposed	no sand	227.515	0	0	0	Gameleira	0	C.leiolepis	BSLM	no sand	205
exposed	no sand	178.443	0	0	0	Gameleira	0	C.leiolepis	BSLM	no sand	206
exposed	no sand	408.816	0	0	0	Gameleira	0	C.leiolepis	BSLM	no sand	207
exposed	no sand	100.94	0	0	0	Gameleira	0	C.leiolepis	BSLM	no sand	208
shaded	no sand	128.397	0	0	0	Gameleira	0	C.leiolepis	BSLM	no sand	209
shaded	no sand	158.337	0	0	0	Gameleira	0	C.leiolepis	BSLM	no sand	210
shaded	no sand	100.28	0	0	0	Gameleira	0	C.leiolepis	BSLM	no sand	211
shaded	no sand	197.858	0	0	0	Gameleira	0	C.leiolepis	BSLM	no sand	212
shaded	no sand	78.3515	0	0	0	Gameleira	0	C.leiolepis	BSLM	no sand	213
exposed	no sand	125.79	0	0	0	Gameleira	0	C.leiolepis	BSLM	no sand	214
exposed	no sand	124.407	0	0	0	Gameleira	0	C.leiolepis	BSLM	no sand	215
exposed	no sand	107.348	0	0	0	Gameleira	0	C.leiolepis	BSLM	no sand	216
shaded	no sand	95.8188	0	0	0	Gameleira	0	C.leiolepis	BSLM	no sand	217
shaded	no sand	88.2475	0	0	0	Gameleira	0	C.leiolepis	BSLM	no sand	218
exposed	no sand	109.265	0	0	0	Gameleira	0	C.leiolepis	BSLM	no sand	219
exposed	no sand	109.516	0	0	0	Gameleira	0	C.leiolepis	BSLM	no sand	220
exposed	no sand	57.5855	0	0	0	Gameleira	0	C.leiolepis	BSLM	no sand	221
shaded	no sand	219.912	0	0.00455	0.00455	Gameleira	0	C.leiolepis	BSLM	no sand	222
shaded	no sand	5.54356	0	0	0	Gameleira	0	C.leiolepis	BSLM	no sand	223
shaded	sand	86.7082	0	0	0	Gameleira	0	C.leiolepis	BSLM	no sand	224
exposed	sand	81.4303	0	0	0	Gameleira	0	C.leiolepis	BSLM	no sand	225
exposed	sand	43.9824	0	0	0	Gameleira	0	C.leiolepis	BSLM	no sand	226
shaded	sand	216.77	0	0	0	Gameleira	0	C.leiolepis	BSLM	no sand	227
shaded	sand	162.107	0	0.01851	0.01851	Gameleira	0	C.leiolepis	BSLM	no sand	228
exposed	sand	99.5259	0	0	0	pedra vermelha	0	C.leiolepis	BSLM	no sand	229
shaded	sand	143.163	0	0	0	pedra vermelha	0	C.leiolepis	BSLM	no sand	230
exposed	sand	4.56	0	0	0	pedra vermelha	0	C.leiolepis	BSLM	no sand	231
shaded	sand	54.2868	0	0	0	pedra vermelha	0	C.leiolepis	BSLM	no sand	232
exposed	sand	119.381	0	0	0	pedra vermelha	0	C.leiolepis	BSLM	no sand	233
shaded	sand	89.1586	0	0.03365	0.03365	pedra vermelha	0	C.leiolepis	BSLM	no sand	234
shaded	sand	111.087	0	0	0	pedra vermelha	0	C.leiolepis	BSLM	no sand	235
shaded	sand	73.8276	0	0.01355	0.01355	pedra vermelha	0	C.leiolepis	BSLM	no sand	236
exposed	sand	80.9276	0	0	0	pedra vermelha	0	C.leiolepis	BSLM	no sand	237
exposed	sand	118.501	0	0	0	pedra vermelha	0	C.leiolepis	BSLM	no sand	238
shaded	sand	33.9293	0.35368	0.02947	0.38315	pedra vermelha	0	C.leiolepis	BSLM	sand	239
shaded	sand	95.002	0.03158	0.02105	0.05263	pedra vermelha	0	C.leiolepis	BSLM	sand	240
shaded	sand	151.739	0	0	0	pedra vermelha	0	C.leiolepis	BSLM	sand	241
exposed	sand	20.8288	0.04801	0	0.04801	pedra vermelha	0	C.leiolepis	BSLM	sand	242
shaded	sand	27.3319	0.03659	0	0.03659	pedra vermelha	0	C.leiolepis	BSLM	sand	243
shaded	sand	19.635	0.05093	0	0.05093	pedra vermelha	0	C.leiolepis	BSLM	sand	244
exposed	sand	15.708	0	0	0	pedra vermelha	0	C.leiolepis	BSLM	sand	245
shaded	sand	6.2832	0	0	0	pedra vermelha	0	C.leiolepis	BSLM	sand	246
shaded	sand	8.01108	0	0	0	pedra vermelha	0	C.leiolepis	BSLM	sand	247
exposed	sand	14.1372	0	0	0	pedra vermelha	0	C.leiolepis	BSLM	sand	248
shaded	sand	37.6992	0	0	0	pedra vermelha	0	C.leiolepis	BSLM	sand	249
exposed	sand	12.5664	0	0	0	pedra vermelha	0	C.leiolepis	BSLM	sand	250
shaded	sand	62.832	0	0	0	pedra vermelha	0	C.leiolepis	BSLM	sand	251
exposed	sand	14.5142	0	0	0	pedra vermelha	0	C.leiolepis	BSLM	sand	252
shaded	sand	7.0686	0	0	0	pedra vermelha	0	C.leiolepis	BSLM	sand	253
shaded	sand	34.5576	0	0	0	pedra vermelha	0	C.leiolepis	BSLM	sand	254
shaded	sand	7.0686	0.14147	0	0.14147	pedra vermelha	0	C.leiolepis	BSLM	sand	255
shaded	sand	25.6355	0	0	0	pedra vermelha	0	C.leiolepis	BSLM	sand	256
exposed	no sand	21.677	0	0	0	pedra vermelha	0	C.leiolepis	BSLM	sand	257
shaded	no sand	17.3416	0	0	0	pedra vermelha	0	C.leiolepis	BSLM	sand	258
exposed	no sand	18.0956	0	0	0	pedra vermelha	0	C.leiolepis	BSLM	sand	259
shaded	no sand	86.7082	0.02307	0	0.02307	pedra vermelha	0	C.leiolepis	BSLM	sand	260
shaded	no sand	46.6528	0.0643	0.02143	0.08574	pedra vermelha	0	C.leiolepis	BSLM	sand	261
shaded	sand	34.8718	0.02868	0.02868	0.05735	vacaria	0	C.leiolepis	BSLM	sand	262
shaded	sand	48.0665	0.0208	0	0.0208	vacaria	0	C.leiolepis	BSLM	sand	263
exposed	sand	36.9452	0	0	0	vacaria	0	C.leiolepis	BSLM	sand	264
exposed	sand	47.2811	0	0	0	vacaria	0	C.leiolepis	BSLM	sand	265
shaded	sand	47.124	0.04244	0.04244	0.08488	vacaria	0	C.leiolepis	BSLM	sand	266
shaded	sand	24.1903	0.12402	0.04134	0.16536	vacaria	0	C.leiolepis	BSLM	sand	267
exposed	sand	31.1018	0	0	0	vacaria	0	C.leiolepis	BSLM	sand	268
exposed	sand	32.0443	0	0	0	vacaria	0	C.leiolepis	BSLM	sand	269
shaded	sand	32.9868	0	0	0	vacaria	0	C.leiolepis	BSLM	sand	270
shaded	sand	49.4802	0	0	0	vacaria	0	C.leiolepis	BSLM	sand	271
shaded	sand	62.832	0	0.01592	0.01592	vacaria	0	C.leiolepis	BSLM	no sand	272
shaded	sand	81.0533	0	0	0	vacaria	0	C.leiolepis	BSLM	no sand	273
shaded	sand	169.646	0	0.01768	0.01768	pedra vermelha	0	C.leiolepis	BSLM	no sand	274
shaded	sand	203.513	0	0.01965	0.01965	pedra vermelha	0	C.leiolepis	BSLM	no sand	275
shaded	sand	31.1647	0	0.03209	0.03209	pedra vermelha	0	C.leiolepis	BSLM	no sand	276
shaded	sand	141.372	0.02122	0	0.02122	alagoado	0	C.nicterus	BSLM	sand	1
shaded	sand	169.646	0.00589	0.00589	0.01179	alagoado	0	C.nicterus	BSLM	sand	2
exposed	sand	125.664	0	0	0	alagoado	0	C.nicterus	BSLM	sand	3
shaded	sand	75.3984	0.03979	0.02653	0.06631	alagoado	0	C.nicterus	BSLM	sand	4
exposed	sand	113.098	0	0	0	alagoado	0	C.nicterus	BSLM	sand	5
exposed	sand	113.098	0	0	0	alagoado	0	C.nicterus	BSLM	sand	6
shaded	sand	282.744	0.01415	0.01061	0.02476	alagoado	0	C.nicterus	BSLM	sand	7
shaded	sand	175.93	0	0.00568	0.00568	alagoado	0	C.nicterus	BSLM	sand	8
exposed	sand	94.248	0	0	0	alagoado	0	C.nicterus	BSLM	sand	9
shaded	sand	376.992	0.00796	0.00531	0.01326	alagoado	0	C.nicterus	BSLM	sand	10
exposed	no sand	125.664	0	0	0	alagoado	0	C.nicterus	BSLM	sand	11
exposed	no sand	122.522	0	0	0	alagoado	0	C.nicterus	BSLM	sand	12
shaded	no sand	138.23	0.0217	0.00723	0.02894	alagoado	0	C.nicterus	BSLM	sand	13
shaded	no sand	113.098	0.04421	0	0.04421	alagoado	0	C.nicterus	BSLM	sand layer	14
shaded	no sand	153.938	0.03898	0	0.03898	alagoado	0	C.nicterus	BSLM	sand layer	15
shaded	no sand	28.2744	0.03537	0	0.03537	alagoado	0	C.nicterus	BSLM	sand layer	16
exposed	no sand	28.2744	0	0	0	alagoado	0	C.nicterus	BSLM	sand layer	17
exposed	no sand	28.2744	0	0	0	alagoado	0	C.nicterus	BSLM	sand layer	18
exposed	no sand	56.5488	0	0	0	alagoado	0	C.nicterus	BSLM	sand layer	19
shaded	no sand	530.93	0.04332	0	0.04332	alagoado	0	C.nicterus	BSLM	sand layer	20
exposed	no sand	207.346	0	0	0	alagoado	0	C.nicterus	BSLM	sand layer	21
shaded	no sand	28.2744	0	0	0	alagoado	0	C.nicterus	BSLM	sand layer	22
shaded	no sand	28.2744	0.03537	0	0.03537	alagoado	0	C.nicterus	BSLM	sand	23
shaded	no sand	12.5664	0	0	0	alagoado	0	C.nicterus	BSLM	sand	24
exposed	sand	78.54	0	0	0	alagoado	0	C.nicterus	BSLM	sand	25
shaded	sand	87.9648	0	0.01137	0.01137	alagoado	0	C.nicterus	BSLM	sand	26
shaded	sand	25.1328	0.03979	0	0.03979	alagoado	0	C.nicterus	BSLM	sand	27
shaded	no sand	37.6992	0	0.07958	0.07958	alagoado	0	C.nicterus	BSLM	sand	28
exposed	sand	18.8496	0	0	0	alagoado	0	C.nicterus	BSLM	sand	29
exposed	sand	37.6992	0	0	0	alagoado	0	C.nicterus	BSLM	sand	30
exposed	sand	78.54	0	0	0	alagoado	0	C.nicterus	BSLM	sand	31
shaded	sand	31.416	0	0.06366	0.06366	alagoado	0	C.nicterus	BSLM	sand	32
shaded	sand	28.2744	0.03537	0.07074	0.1061	alagoado	0	C.nicterus	BSLM	sand	33
exposed	sand	50.2656	0	0	0	alagoado	0	C.nicterus	BSLM	sand	34
shaded	sand	109.956	0.05457	0.00909	0.06366	alagoado	0	C.nicterus	BSLM	sand layer	35
shaded	sand	188.496	0	0.01061	0.01061	alagoado	0	C.nicterus	BSLM	sand layer	36
exposed	sand	226.195	0	0	0	alagoado	0	C.nicterus	BSLM	sand layer	37
exposed	sand	141.372	0	0	0	alagoado	0	C.nicterus	BSLM	sand layer	38
exposed	sand	75.3984	0.03979	0.01326	0.05305	alagoado	0	C.nicterus	BSLM	sand layer	39
shaded	sand	50.2656	0	0	0	alagoado	0	C.nicterus	BSLM	sand layer	40
exposed	sand	62.832	0	0	0	alagoado	0	C.nicterus	BSLM	sand layer	41
exposed	sand	75.3984	0	0	0	alagoado	0	C.nicterus	BSLM	sand layer	42
shaded	sand	94.248	0.01061	0	0.01061	alagoado	0	C.nicterus	BSLM	sand layer	43
shaded	sand	131.947	0	0	0	alagoado	0	C.nicterus	BSLM	sand layer	44
exposed	sand	62.832	0	0	0	alagoado	0	C.nicterus	BSLM	sand layer	45
exposed	sand	94.248	0	0	0	alagoado	0	C.nicterus	BSLM	sand layer	46
shaded	sand	94.248	0	0	0	alagoado	0	C.nicterus	BSLM	no sand	47
shaded	sand	109.956	0.00909	0	0.00909	alagoado	0	C.nicterus	BSLM	no sand	48
shaded	sand	50.2656	0	0	0	alagoado	0	C.nicterus	BSLM	no sand	49
shaded	sand	47.124	0	0	0	alagoado	0	C.nicterus	BSLM	no sand	50
exposed	sand	78.54	0	0	0	alagoado	0	C.nicterus	BSLM	no sand	51
exposed	sand	56.5488	0	0	0	alagoado	0	C.nicterus	BSLM	no sand	52
shaded	sand	78.54	0.02546	0.02546	0.05093	alagoado	0	C.nicterus	BSLM	no sand	53
shaded	sand	201.062	0.00497	0.00995	0.01492	alagoado	0	C.nicterus	BSLM	no sand	54
exposed	sand	94.248	0	0	0	alagoado	0	C.nicterus	BSLM	no sand	55
exposed	sand	245.045	0	0	0	alagoado	0	C.nicterus	BSLM	no sand	56
shaded	sand	62.832	0.04775	0.03183	0.07958	alagoado	0	C.nicterus	BSLM	sand layer	57
shaded	sand	197.921	0.06063	0.02526	0.08589	alagoado	0	C.nicterus	BSLM	sand layer	58
exposed	sand	94.248	0	0	0	alagoado	0	C.nicterus	BSLM	sand layer	59
shaded	sand	50.2656	0.03979	0.05968	0.09947	alagoado	0	C.nicterus	BSLM	sand layer	60
exposed	sand	56.5488	0	0	0	alagoado	0	C.nicterus	BSLM	sand layer	61
shaded	sand	251.328	0.01989	0.00398	0.02387	alagoado	0	C.nicterus	BSLM	sand layer	62
shaded	sand	131.947	0.06821	0.00758	0.07579	alagoado	0	C.nicterus	BSLM	sand layer	63
exposed	sand	109.956	0.00909	0	0.00909	alagoado	0	C.nicterus	BSLM	sand layer	64
exposed	sand	87.9648	0	0	0	alagoado	0	C.nicterus	BSLM	sand layer	65
shaded	sand	50.2656	0.01989	0.03979	0.05968	alagoado	0	C.nicterus	BSLM	sand layer	66
shaded	sand	75.3984	0.06631	0.01326	0.07958	alagoado	0	C.nicterus	BSLM	sand layer	67
shaded	sand	50.2656	0.13926	0.03979	0.17905	alagoado	0	C.nicterus	BSLM	sand layer	68
exposed	sand	37.6992	0	0	0	alagoado	0	C.nicterus	BSLM	sand layer	69
exposed	sand	37.6992	0	0	0	alagoado	0	C.nicterus	BSLM	sand layer	70
exposed	sand	56.5488	0	0	0	alagoado	0	C.nicterus	BSLM	sand layer	71
shaded	sand	201.062	0.00995	0	0.00995	alagoado	0	C.nicterus	BSLM	no sand	72
shaded	sand	62.832	0	0	0	alagoado	0	C.nicterus	BSLM	no sand	73
shaded	sand	87.9648	0	0	0	alagoado	0	C.nicterus	BSLM	no sand	74
shaded	sand	87.9648	0	0	0	alagoado	0	C.nicterus	BSLM	no sand	75
shaded	sand	50.2656	0.01989	0.01989	0.03979	alagoado	0	C.nicterus	BSLM	sand	76
shaded	sand	28.2744	0.03537	0.1061	0.14147	alagoado	0	C.nicterus	BSLM	sand	77
shaded	sand	47.124	0.02122	0.02122	0.04244	alagoado	0	C.nicterus	BSLM	sand	78
shaded	sand	78.54	0	0	0	alagoado	0	C.nicterus	BSLM	no sand	79
shaded	sand	10.0531	0	0	0	catimbau	0	C.nicterus	BSLM	sand	80
exposed	sand	65.6594	0	0	0	catimbau	0	C.nicterus	BSLM	sand	81
exposed	sand	34.212	0	0	0	catimbau	0	C.nicterus	BSLM	sand	82
exposed	sand	32.0443	0	0	0	catimbau	0	C.nicterus	BSLM	sand	83
exposed	sand	22.054	0	0	0	catimbau	0	C.nicterus	BSLM	sand	84
exposed	sand	91.6091	0	0	0	catimbau	0	C.nicterus	BSLM	sand	85
shaded	sand	20.4204	0	0	0	catimbau	0	C.nicterus	BSLM	sand	86
shaded	sand	7.75975	0.12887	0	0.12887	catimbau	0	C.nicterus	BSLM	sand	87
shaded	sand	32.2014	0	0.03105	0.03105	catimbau	0	C.nicterus	BSLM	sand	88
shaded	sand	164.934	0.00606	0	0.00606	catimbau	0	C.nicterus	BSLM	sand	89
exposed	sand	153.153	0	0	0	catimbau	0	C.nicterus	BSLM	sand	90
exposed	sand	47.501	0	0	0	catimbau	0	C.nicterus	BSLM	sand	91
shaded	sand	55.7634	0.01793	0.03587	0.0538	catimbau	0	C.nicterus	BSLM	sand	92
exposed	sand	24.1275	0	0	0	catimbau	0	C.nicterus	BSLM	sand	93
shaded	sand	73.2307	0	0.02731	0.02731	catimbau	0	C.nicterus	BSLM	sand	94
exposed	sand	118.187	0	0	0	catimbau	0	C.nicterus	BSLM	sand	95
exposed	sand	42.5058	0	0	0	catimbau	0	C.nicterus	BSLM	sand	96
exposed	sand	98.0179	0	0	0	catimbau	0	C.nicterus	BSLM	sand	97
shaded	sand	77.519	0.0129	0.0387	0.0516	catimbau	0	C.nicterus	BSLM	sand	98
shaded	sand	38.4846	0.02598	0.02598	0.05197	catimbau	0	C.nicterus	BSLM	sand	99
shaded	sand	137.366	0	0.00728	0.00728	catimbau	0	C.nicterus	BSLM	sand	100
exposed	sand	113.098	0	0	0	catimbau	0	C.nicterus	BSLM	sand	101
exposed	sand	72.0683	0	0	0	catimbau	0	C.nicterus	BSLM	sand	102
exposed	sand	81.8073	0	0	0	catimbau	0	C.nicterus	BSLM	sand	103
shaded	sand	68.0471	0	0	0	catimbau	0	C.nicterus	BSLM	sand	104
exposed	sand	7.0686	0	0	0	catimbau	0	C.nicterus	BSLM	sand	105
shaded	sand	135.717	0	0.00737	0.00737	catimbau	0	C.nicterus	BSLM	sand	106
shaded	sand	10.6814	0.09362	0	0.09362	catimbau	0	C.nicterus	BSLM	sand	107
exposed	sand	40.7151	0	0	0	catimbau	0	C.nicterus	BSLM	sand	108
exposed	sand	95.5046	0	0	0	catimbau	0	C.nicterus	BSLM	sand	109
exposed	sand	11.781	0	0	0	catimbau	0	C.nicterus	BSLM	sand	110
shaded	sand	15.8965	0	0	0	catimbau	0	C.nicterus	BSLM	sand	111
exposed	sand	18.7868	0	0	0	catimbau	0	C.nicterus	BSLM	sand	112
exposed	sand	26.9549	0	0	0	catimbau	0	C.nicterus	BSLM	sand	113
exposed	sand	12.0637	0	0	0	catimbau	0	C.nicterus	BSLM	sand	114
shaded	sand	93.117	0	0.02148	0.02148	catimbau	0	C.nicterus	BSLM	sand	115
exposed	sand	12.4407	0	0	0	catimbau	0	C.nicterus	BSLM	sand	116
exposed	sand	82.3728	0	0	0	catimbau	0	C.nicterus	BSLM	sand	117
shaded	sand	9.6133	0	0.10402	0.10402	catimbau	0	C.nicterus	BSLM	sand	118
shaded	sand	25.1328	0	0	0	catimbau	0	C.nicterus	BSLM	sand	119
shaded	sand	23.562	0	0.04244	0.04244	catimbau	0	C.nicterus	BSLM	sand	120
shaded	sand	30.1594	0	0	0	catimbau	0	C.nicterus	BSLM	sand	121
exposed	sand	42.7258	0	0	0	catimbau	0	C.nicterus	BSLM	sand	122
exposed	sand	58.1196	0	0	0	catimbau	0	C.nicterus	BSLM	sand	123
exposed	sand	32.0443	0	0	0	catimbau	0	C.nicterus	BSLM	sand	124
exposed	sand	80.582	0	0	0	catimbau	0	C.nicterus	BSLM	sand	125
shaded	sand	9.89604	0.10105	0	0.10105	catimbau	0	C.nicterus	BSLM	sand	126
shaded	sand	6.78586	0.14737	0	0.14737	catimbau	0	C.nicterus	BSLM	sand	127
shaded	sand	38.6998	0.05168	0.05168	0.10336	catimbau	0	C.nicterus	BSLM	sand	128
exposed	sand	67.7329	0	0	0	catimbau	0	C.nicterus	BSLM	sand	129
exposed	sand	34.5576	0	0	0	catimbau	0	C.nicterus	BSLM	sand	130
exposed	sand	15.708	0	0	0	catimbau	0	C.nicterus	BSLM	sand	131
exposed	no sand	27.0492	0	0	0	catimbau	0	C.nicterus	BSLM	sand	132
shaded	no sand	75.3984	0	0.02653	0.02653	catimbau	0	C.nicterus	BSLM	sand	133
shaded	no sand	92.4887	0	0	0	catimbau	0	C.nicterus	BSLM	sand	134
shaded	no sand	12.7235	0.23578	0	0.23578	catimbau	0	C.nicterus	BSLM	sand	135
shaded	no sand	19.7921	0.10105	0.05053	0.15158	catimbau	0	C.nicterus	BSLM	sand	136
exposed	no sand	25.1328	0	0	0	catimbau	0	C.nicterus	BSLM	sand	137
exposed	no sand	45.082	0	0	0	catimbau	0	C.nicterus	BSLM	sand	138
exposed	no sand	34.0864	0	0	0	catimbau	0	C.nicterus	BSLM	sand	139
exposed	no sand	16.9646	0	0	0	catimbau	0	C.nicterus	BSLM	sand	140
exposed	no sand	17.8129	0	0	0	catimbau	0	C.nicterus	BSLM	sand	141
exposed	no sand	8.16816	0	0	0	catimbau	0	C.nicterus	BSLM	sand	142
exposed	no sand	16.0222	0	0	0	catimbau	0	C.nicterus	BSLM	sand	143
shaded	no sand	22.8708	0	0.04372	0.04372	catimbau	0	C.nicterus	BSLM	sand	144
shaded	no sand	47.6895	0	0	0	catimbau	0	C.nicterus	BSLM	sand	145
exposed	no sand	17.97	0	0	0	catimbau	0	C.nicterus	BSLM	sand	146
exposed	no sand	7.2571	0	0	0	catimbau	0	C.nicterus	BSLM	sand	147
exposed	no sand	15.8337	0	0	0	catimbau	0	C.nicterus	BSLM	sand	148
shaded	no sand	113.098	0	0.02653	0.02653	catimbau	0	C.nicterus	BSLM	sand	149
shaded	no sand	19.635	0.10186	0	0.10186	catimbau	0	C.nicterus	BSLM	sand	150
shaded	no sand	21.2372	0.04709	0	0.04709	catimbau	0	C.nicterus	BSLM	sand	151
exposed	no sand	6.40886	0	0	0	catimbau	0	C.nicterus	BSLM	sand	152
exposed	no sand	17.1531	0	0	0	catimbau	0	C.nicterus	BSLM	sand	153
exposed	no sand	28.2744	0	0	0	catimbau	0	C.nicterus	BSLM	sand	154
exposed	no sand	16.1164	0	0	0	catimbau	0	C.nicterus	BSLM	sand	155
exposed	no sand	23.562	0	0	0	catimbau	0	C.nicterus	BSLM	sand	156
shaded	no sand	56.0776	0.03566	0.01783	0.0535	catimbau	0	C.nicterus	BSLM	sand	157
shaded	no sand	33.7094	0.05933	0	0.05933	catimbau	0	C.nicterus	BSLM	sand	158
exposed	no sand	15.2053	0	0	0	catimbau	0	C.nicterus	BSLM	sand	159
exposed	no sand	16.4934	0	0	0	catimbau	0	C.nicterus	BSLM	sand	160
exposed	no sand	38.3589	0	0	0	catimbau	0	C.nicterus	BSLM	sand	161
exposed	no sand	19.7921	0	0	0	catimbau	0	C.nicterus	BSLM	sand	162
exposed	no sand	4.5239	0	0	0	catimbau	0	C.nicterus	BSLM	sand	163
shaded	no sand	58.0568	0.03445	0.0689	0.10335	catimbau	0	C.nicterus	BSLM	sand	164
shaded	no sand	103.673	0.01929	0	0.01929	catimbau	0	C.nicterus	BSLM	sand	165
exposed	no sand	13.1947	0	0	0	catimbau	0	C.nicterus	BSLM	sand	166
exposed	no sand	42.7258	0	0	0	catimbau	0	C.nicterus	BSLM	sand	167
exposed	no sand	7.0686	0	0	0	catimbau	0	C.nicterus	BSLM	sand	168
shaded	no sand	10.5558	0	0.09473	0.09473	catimbau	0	C.nicterus	BSLM	sand	169
shaded	no sand	18.7868	0.05323	0	0.05323	catimbau	0	C.nicterus	BSLM	sand	170
shaded	no sand	30.0651	0.03326	0.03326	0.06652	catimbau	0	C.nicterus	BSLM	sand	171
shaded	no sand	88.3418	0.02264	0	0.02264	catimbau	0	C.nicterus	BSLM	sand	172
exposed	no sand	11.3098	0	0	0	catimbau	0	C.nicterus	BSLM	sand	173
shaded	no sand	15.2682	0.13099	0.0655	0.19649	catimbau	0	C.nicterus	BSLM	sand	174
exposed	no sand	6.03187	0	0	0	catimbau	0	C.nicterus	BSLM	sand	175
exposed	no sand	34.7775	0	0	0	catimbau	0	C.nicterus	BSLM	sand	176
exposed	no sand	11.8752	0	0	0	catimbau	0	C.nicterus	BSLM	sand	177
shaded	no sand	23.7505	0	0.08421	0.08421	catimbau	0	C.nicterus	BSLM	sand	178
exposed	no sand	15.8337	0	0	0	catimbau	0	C.nicterus	BSLM	sand	179
exposed	no sand	2.82744	0	0	0	catimbau	0	C.nicterus	BSLM	sand	180
shaded	no sand	18.7868	0.05323	0.05323	0.10646	catimbau	0	C.nicterus	BSLM	sand	181
exposed	no sand	11.3098	0	0	0	catimbau	0	C.nicterus	BSLM	sand	182
shaded	no sand	6.44895	0	0.15506	0.15506	Gameleira	0	C.nicterus	BSLM	no sand	183
shaded	no sand	3.55424	0	0	0	Gameleira	0	C.nicterus	BSLM	no sand	184
shaded	no sand	3.84354	0	0	0	Gameleira	0	C.nicterus	BSLM	no sand	185
shaded	no sand	7.22342	0	0.13844	0.13844	Gameleira	0	C.nicterus	BSLM	no sand	186
exposed	no sand	8.3436	0	0	0	Gameleira	0	C.nicterus	BSLM	no sand	187
exposed	sand	2.25345	0	0	0	Gameleira	0	C.nicterus	BSLM	no sand	188
exposed	sand	2.7543	0	0	0	Gameleira	0	C.nicterus	BSLM	no sand	189
exposed	sand	95.8188	0	0	0	Gameleira	0	C.nicterus	BSLM	no sand	190
shaded	sand	197.921	0	0	0	Gameleira	0	C.nicterus	BSLM	no sand	191
exposed	sand	169.646	0	0	0	Gameleira	0	C.nicterus	BSLM	no sand	192
exposed	sand	226.195	0	0	0	Gameleira	0	C.nicterus	BSLM	no sand	193
exposed	sand	197.921	0	0	0	Gameleira	0	C.nicterus	BSLM	no sand	194
shaded	sand	117.339	0	0.01704	0.01704	Gameleira	0	C.nicterus	BSLM	no sand	195
shaded	sand	173.165	0	0	0	Gameleira	0	C.nicterus	BSLM	no sand	196
shaded	sand	268.607	0	0	0	Gameleira	0	C.nicterus	BSLM	no sand	197
shaded	sand	226.195	0	0.00442	0.00442	Gameleira	0	C.nicterus	BSLM	no sand	198
shaded	sand	50.2656	0	0	0	Gameleira	0	C.nicterus	BSLM	no sand	199
shaded	sand	113.098	0	0.01768	0.01768	Gameleira	0	C.nicterus	BSLM	no sand	200
shaded	sand	107.348	0	0.00932	0.00932	Gameleira	0	C.nicterus	BSLM	no sand	201
shaded	sand	120.763	0	0.01656	0.01656	Gameleira	0	C.nicterus	BSLM	no sand	202
exposed	sand	178.883	0	0	0	Gameleira	0	C.nicterus	BSLM	no sand	203
exposed	sand	133.832	0	0	0	Gameleira	0	C.nicterus	BSLM	no sand	204
exposed	sand	227.515	0	0	0	Gameleira	0	C.nicterus	BSLM	no sand	205
exposed	sand	178.443	0	0	0	Gameleira	0	C.nicterus	BSLM	no sand	206
exposed	sand	408.816	0	0	0	Gameleira	0	C.nicterus	BSLM	no sand	207
exposed	sand	100.94	0	0	0	Gameleira	0	C.nicterus	BSLM	no sand	208
shaded	sand	128.397	0	0	0	Gameleira	0	C.nicterus	BSLM	no sand	209
shaded	sand	158.337	0	0	0	Gameleira	0	C.nicterus	BSLM	no sand	210
shaded	sand	100.28	0	0	0	Gameleira	0	C.nicterus	BSLM	no sand	211
shaded	sand	197.858	0	0	0	Gameleira	0	C.nicterus	BSLM	no sand	212
shaded	sand	78.3515	0	0	0	Gameleira	0	C.nicterus	BSLM	no sand	213
exposed	sand	125.79	0	0	0	Gameleira	0	C.nicterus	BSLM	no sand	214
exposed	sand	124.407	0	0	0	Gameleira	0	C.nicterus	BSLM	no sand	215
exposed	sand	107.348	0	0	0	Gameleira	0	C.nicterus	BSLM	no sand	216
shaded	sand	95.8188	0	0	0	Gameleira	0	C.nicterus	BSLM	no sand	217
shaded	sand	88.2475	0	0	0	Gameleira	0	C.nicterus	BSLM	no sand	218
exposed	sand	109.265	0	0	0	Gameleira	0	C.nicterus	BSLM	no sand	219
exposed	sand	109.516	0	0	0	Gameleira	0	C.nicterus	BSLM	no sand	220
exposed	no sand	57.5855	0	0	0	Gameleira	0	C.nicterus	BSLM	no sand	221
shaded	no sand	219.912	0	0.00455	0.00455	Gameleira	0	C.nicterus	BSLM	no sand	222
shaded	no sand	5.54356	0	0	0	Gameleira	0	C.nicterus	BSLM	no sand	223
shaded	no sand	86.7082	0	0	0	Gameleira	0	C.nicterus	BSLM	no sand	224
exposed	no sand	81.4303	0	0	0	Gameleira	0	C.nicterus	BSLM	no sand	225
exposed	sand	43.9824	0	0	0	Gameleira	0	C.nicterus	BSLM	no sand	226
shaded	sand	216.77	0	0	0	Gameleira	0	C.nicterus	BSLM	no sand	227
shaded	sand	162.107	0	0.01851	0.01851	Gameleira	0	C.nicterus	BSLM	no sand	228
exposed	sand	99.5259	0	0	0	pedra vermelha	0	C.nicterus	BSLM	no sand	229
shaded	sand	143.163	0	0	0	pedra vermelha	0	C.nicterus	BSLM	no sand	230
exposed	sand	4.56	0	0	0	pedra vermelha	0	C.nicterus	BSLM	no sand	231
shaded	sand	54.2868	0	0	0	pedra vermelha	0	C.nicterus	BSLM	no sand	232
exposed	sand	119.381	0	0	0	pedra vermelha	0	C.nicterus	BSLM	no sand	233
shaded	sand	89.1586	0	0.03365	0.03365	pedra vermelha	0	C.nicterus	BSLM	no sand	234
shaded	sand	111.087	0	0	0	pedra vermelha	0	C.nicterus	BSLM	no sand	235
shaded	sand	73.8276	0	0.01355	0.01355	pedra vermelha	0	C.nicterus	BSLM	no sand	236
exposed	sand	80.9276	0	0	0	pedra vermelha	0	C.nicterus	BSLM	no sand	237
exposed	sand	118.501	0	0	0	pedra vermelha	0	C.nicterus	BSLM	no sand	238
shaded	sand	33.9293	0.35368	0.02947	0.38315	pedra vermelha	0	C.nicterus	BSLM	sand	239
shaded	sand	95.002	0.03158	0.02105	0.05263	pedra vermelha	0	C.nicterus	BSLM	sand	240
shaded	sand	151.739	0	0	0	pedra vermelha	0	C.nicterus	BSLM	sand	241
exposed	sand	20.8288	0.04801	0	0.04801	pedra vermelha	0	C.nicterus	BSLM	sand	242
shaded	sand	27.3319	0.03659	0	0.03659	pedra vermelha	0	C.nicterus	BSLM	sand	243
shaded	sand	19.635	0.05093	0	0.05093	pedra vermelha	0	C.nicterus	BSLM	sand	244
exposed	sand	15.708	0	0	0	pedra vermelha	0	C.nicterus	BSLM	sand	245
shaded	sand	6.2832	0	0	0	pedra vermelha	0	C.nicterus	BSLM	sand	246
shaded	sand	8.01108	0	0	0	pedra vermelha	0	C.nicterus	BSLM	sand	247
exposed	sand	14.1372	0	0	0	pedra vermelha	0	C.nicterus	BSLM	sand	248
shaded	sand	37.6992	0	0	0	pedra vermelha	0	C.nicterus	BSLM	sand	249
exposed	sand	12.5664	0	0	0	pedra vermelha	0	C.nicterus	BSLM	sand	250
shaded	no sand	62.832	0	0	0	pedra vermelha	0	C.nicterus	BSLM	sand	251
exposed	no sand	14.5142	0	0	0	pedra vermelha	0	C.nicterus	BSLM	sand	252
shaded	no sand	7.0686	0	0	0	pedra vermelha	0	C.nicterus	BSLM	sand	253
shaded	no sand	34.5576	0	0	0	pedra vermelha	0	C.nicterus	BSLM	sand	254
shaded	no sand	7.0686	0.14147	0	0.14147	pedra vermelha	0	C.nicterus	BSLM	sand	255
shaded	no sand	25.6355	0	0	0	pedra vermelha	0	C.nicterus	BSLM	sand	256
exposed	no sand	21.677	0	0	0	pedra vermelha	0	C.nicterus	BSLM	sand	257
shaded	no sand	17.3416	0	0	0	pedra vermelha	0	C.nicterus	BSLM	sand	258
exposed	no sand	18.0956	0	0	0	pedra vermelha	0	C.nicterus	BSLM	sand	259
shaded	no sand	86.7082	0.02307	0	0.02307	pedra vermelha	0	C.nicterus	BSLM	sand	260
shaded	no sand	46.6528	0.0643	0.02143	0.08574	pedra vermelha	0	C.nicterus	BSLM	sand	261
shaded	no sand	34.8718	0.02868	0.02868	0.05735	vacaria	1	C.nicterus	BSLM	sand	262
shaded	no sand	48.0665	0.0208	0	0.0208	vacaria	1	C.nicterus	BSLM	sand	263
exposed	no sand	36.9452	0	0	0	vacaria	0	C.nicterus	BSLM	sand	264
exposed	sand	47.2811	0	0	0	vacaria	0	C.nicterus	BSLM	sand	265
shaded	sand	47.124	0.04244	0.04244	0.08488	vacaria	2	C.nicterus	BSLM	sand	266
shaded	sand	24.1903	0.12402	0.04134	0.16536	vacaria	3	C.nicterus	BSLM	sand	267
exposed	no sand	31.1018	0	0	0	vacaria	0	C.nicterus	BSLM	sand	268
exposed	sand	32.0443	0	0	0	vacaria	0	C.nicterus	BSLM	sand	269
shaded	sand	32.9868	0	0	0	vacaria	0	C.nicterus	BSLM	sand	270
shaded	sand	49.4802	0	0	0	vacaria	0	C.nicterus	BSLM	sand	271
shaded	sand	62.832	0	0.01592	0.01592	vacaria	0	C.nicterus	BSLM	no sand	272
shaded	sand	81.0533	0	0	0	vacaria	0	C.nicterus	BSLM	no sand	273
shaded	sand	169.646	0	0.01768	0.01768	pedra vermelha	0	C.nicterus	BSLM	no sand	274
shaded	sand	203.513	0	0.01965	0.01965	pedra vermelha	0	C.nicterus	BSLM	no sand	275
shaded	sand	31.1647	0	0.03209	0.03209	pedra vermelha	0	C.nicterus	BSLM	no sand	276
shaded	sand	141.372	0.02122	0	0.02122	alagoado	0	C. sinebrachiatus	BSLM	sand	1
shaded	sand	169.646	0.00589	0.00589	0.01179	alagoado	0	C. sinebrachiatus	BSLM	sand	2
exposed	sand	125.664	0	0	0	alagoado	0	C. sinebrachiatus	BSLM	sand	3
shaded	sand	75.3984	0.03979	0.02653	0.06631	alagoado	0	C. sinebrachiatus	BSLM	sand	4
exposed	sand	113.098	0	0	0	alagoado	0	C. sinebrachiatus	BSLM	sand	5
exposed	sand	113.098	0	0	0	alagoado	0	C. sinebrachiatus	BSLM	sand	6
shaded	sand	282.744	0.01415	0.01061	0.02476	alagoado	0	C. sinebrachiatus	BSLM	sand	7
shaded	sand	175.93	0	0.00568	0.00568	alagoado	0	C. sinebrachiatus	BSLM	sand	8
exposed	sand	94.248	0	0	0	alagoado	0	C. sinebrachiatus	BSLM	sand	9
shaded	sand	376.992	0.00796	0.00531	0.01326	alagoado	0	C. sinebrachiatus	BSLM	sand	10
exposed	sand	125.664	0	0	0	alagoado	0	C. sinebrachiatus	BSLM	sand	11
exposed	sand	122.522	0	0	0	alagoado	0	C. sinebrachiatus	BSLM	sand	12
shaded	sand	138.23	0.0217	0.00723	0.02894	alagoado	0	C. sinebrachiatus	BSLM	sand	13
shaded	sand	113.098	0.04421	0	0.04421	alagoado	0	C. sinebrachiatus	BSLM	sand layer	14
shaded	sand	153.938	0.03898	0	0.03898	alagoado	0	C. sinebrachiatus	BSLM	sand layer	15
shaded	sand	28.2744	0.03537	0	0.03537	alagoado	0	C. sinebrachiatus	BSLM	sand layer	16
exposed	sand	28.2744	0	0	0	alagoado	0	C. sinebrachiatus	BSLM	sand layer	17
exposed	sand	28.2744	0	0	0	alagoado	0	C. sinebrachiatus	BSLM	sand layer	18
exposed	sand	56.5488	0	0	0	alagoado	0	C. sinebrachiatus	BSLM	sand layer	19
shaded	sand	530.93	0.04332	0	0.04332	alagoado	0	C. sinebrachiatus	BSLM	sand layer	20
exposed	sand	207.346	0	0	0	alagoado	0	C. sinebrachiatus	BSLM	sand layer	21
shaded	sand	28.2744	0	0	0	alagoado	0	C. sinebrachiatus	BSLM	sand layer	22
shaded	sand	28.2744	0.03537	0	0.03537	alagoado	0	C. sinebrachiatus	BSLM	sand	23
shaded	sand	12.5664	0	0	0	alagoado	0	C. sinebrachiatus	BSLM	sand	24
exposed	sand	78.54	0	0	0	alagoado	0	C. sinebrachiatus	BSLM	sand	25
shaded	sand	87.9648	0	0.01137	0.01137	alagoado	0	C. sinebrachiatus	BSLM	sand	26
shaded	sand	25.1328	0.03979	0	0.03979	alagoado	0	C. sinebrachiatus	BSLM	sand	27
shaded	sand	37.6992	0	0.07958	0.07958	alagoado	0	C. sinebrachiatus	BSLM	sand	28
exposed	sand	18.8496	0	0	0	alagoado	0	C. sinebrachiatus	BSLM	sand	29
exposed	sand	37.6992	0	0	0	alagoado	0	C. sinebrachiatus	BSLM	sand	30
exposed	sand	78.54	0	0	0	alagoado	0	C. sinebrachiatus	BSLM	sand	31
shaded	sand	31.416	0	0.06366	0.06366	alagoado	0	C. sinebrachiatus	BSLM	sand	32
shaded	sand	28.2744	0.03537	0.07074	0.1061	alagoado	0	C. sinebrachiatus	BSLM	sand	33
exposed	sand	50.2656	0	0	0	alagoado	0	C. sinebrachiatus	BSLM	sand	34
shaded	sand	109.956	0.05457	0.00909	0.06366	alagoado	0	C. sinebrachiatus	BSLM	sand layer	35
shaded	sand	188.496	0	0.01061	0.01061	alagoado	0	C. sinebrachiatus	BSLM	sand layer	36
exposed	sand	226.195	0	0	0	alagoado	0	C. sinebrachiatus	BSLM	sand layer	37
exposed	sand	141.372	0	0	0	alagoado	0	C. sinebrachiatus	BSLM	sand layer	38
exposed	sand	75.3984	0.03979	0.01326	0.05305	alagoado	0	C. sinebrachiatus	BSLM	sand layer	39
shaded	sand	50.2656	0	0	0	alagoado	0	C. sinebrachiatus	BSLM	sand layer	40
exposed	sand	62.832	0	0	0	alagoado	0	C. sinebrachiatus	BSLM	sand layer	41
exposed	sand	75.3984	0	0	0	alagoado	0	C. sinebrachiatus	BSLM	sand layer	42
shaded	sand	94.248	0.01061	0	0.01061	alagoado	0	C. sinebrachiatus	BSLM	sand layer	43
shaded	sand	131.947	0	0	0	alagoado	0	C. sinebrachiatus	BSLM	sand layer	44
exposed	sand	62.832	0	0	0	alagoado	0	C. sinebrachiatus	BSLM	sand layer	45
exposed	sand	94.248	0	0	0	alagoado	0	C. sinebrachiatus	BSLM	sand layer	46
shaded	sand	94.248	0	0	0	alagoado	0	C. sinebrachiatus	BSLM	no sand	47
shaded	sand	109.956	0.00909	0	0.00909	alagoado	0	C. sinebrachiatus	BSLM	no sand	48
shaded	sand	50.2656	0	0	0	alagoado	0	C. sinebrachiatus	BSLM	no sand	49
shaded	sand	47.124	0	0	0	alagoado	0	C. sinebrachiatus	BSLM	no sand	50
exposed	sand	78.54	0	0	0	alagoado	0	C. sinebrachiatus	BSLM	no sand	51
exposed	sand	56.5488	0	0	0	alagoado	0	C. sinebrachiatus	BSLM	no sand	52
shaded	sand	78.54	0.02546	0.02546	0.05093	alagoado	0	C. sinebrachiatus	BSLM	no sand	53
shaded	sand	201.062	0.00497	0.00995	0.01492	alagoado	0	C. sinebrachiatus	BSLM	no sand	54
exposed	sand	94.248	0	0	0	alagoado	0	C. sinebrachiatus	BSLM	no sand	55
exposed	sand	245.045	0	0	0	alagoado	0	C. sinebrachiatus	BSLM	no sand	56
shaded	sand	62.832	0.04775	0.03183	0.07958	alagoado	0	C. sinebrachiatus	BSLM	sand layer	57
shaded	sand	197.921	0.06063	0.02526	0.08589	alagoado	0	C. sinebrachiatus	BSLM	sand layer	58
exposed	sand	94.248	0	0	0	alagoado	0	C. sinebrachiatus	BSLM	sand layer	59
shaded	sand	50.2656	0.03979	0.05968	0.09947	alagoado	0	C. sinebrachiatus	BSLM	sand layer	60
exposed	sand	56.5488	0	0	0	alagoado	0	C. sinebrachiatus	BSLM	sand layer	61
shaded	sand	251.328	0.01989	0.00398	0.02387	alagoado	0	C. sinebrachiatus	BSLM	sand layer	62
shaded	sand	131.947	0.06821	0.00758	0.07579	alagoado	0	C. sinebrachiatus	BSLM	sand layer	63
exposed	sand	109.956	0.00909	0	0.00909	alagoado	0	C. sinebrachiatus	BSLM	sand layer	64
exposed	sand	87.9648	0	0	0	alagoado	0	C. sinebrachiatus	BSLM	sand layer	65
shaded	sand	50.2656	0.01989	0.03979	0.05968	alagoado	0	C. sinebrachiatus	BSLM	sand layer	66
shaded	sand	75.3984	0.06631	0.01326	0.07958	alagoado	0	C. sinebrachiatus	BSLM	sand layer	67
shaded	sand	50.2656	0.13926	0.03979	0.17905	alagoado	0	C. sinebrachiatus	BSLM	sand layer	68
exposed	sand	37.6992	0	0	0	alagoado	0	C. sinebrachiatus	BSLM	sand layer	69
exposed	sand	37.6992	0	0	0	alagoado	0	C. sinebrachiatus	BSLM	sand layer	70
exposed	sand	56.5488	0	0	0	alagoado	0	C. sinebrachiatus	BSLM	sand layer	71
shaded	sand	201.062	0.00995	0	0.00995	alagoado	0	C. sinebrachiatus	BSLM	no sand	72
shaded	sand	62.832	0	0	0	alagoado	0	C. sinebrachiatus	BSLM	no sand	73
shaded	sand	87.9648	0	0	0	alagoado	0	C. sinebrachiatus	BSLM	no sand	74
shaded	sand	87.9648	0	0	0	alagoado	0	C. sinebrachiatus	BSLM	no sand	75
shaded	sand	50.2656	0.01989	0.01989	0.03979	alagoado	0	C. sinebrachiatus	BSLM	sand	76
shaded	sand	28.2744	0.03537	0.1061	0.14147	alagoado	0	C. sinebrachiatus	BSLM	sand	77
shaded	sand	47.124	0.02122	0.02122	0.04244	alagoado	0	C. sinebrachiatus	BSLM	sand	78
shaded	sand	78.54	0	0	0	alagoado	0	C. sinebrachiatus	BSLM	no sand	79
shaded	sand	10.0531	0	0	0	catimbau	0	C. sinebrachiatus	BSLM	sand	80
exposed	sand	65.6594	0	0	0	catimbau	0	C. sinebrachiatus	BSLM	sand	81
exposed	sand	34.212	0	0	0	catimbau	0	C. sinebrachiatus	BSLM	sand	82
exposed	sand	32.0443	0	0	0	catimbau	0	C. sinebrachiatus	BSLM	sand	83
exposed	sand	22.054	0	0	0	catimbau	0	C. sinebrachiatus	BSLM	sand	84
exposed	sand	91.6091	0	0	0	catimbau	0	C. sinebrachiatus	BSLM	sand	85
shaded	sand	20.4204	0	0	0	catimbau	0	C. sinebrachiatus	BSLM	sand	86
shaded	sand	7.75975	0.12887	0	0.12887	catimbau	0	C. sinebrachiatus	BSLM	sand	87
shaded	sand	32.2014	0	0.03105	0.03105	catimbau	0	C. sinebrachiatus	BSLM	sand	88
shaded	sand	164.934	0.00606	0	0.00606	catimbau	0	C. sinebrachiatus	BSLM	sand	89
exposed	sand	153.153	0	0	0	catimbau	0	C. sinebrachiatus	BSLM	sand	90
exposed	sand	47.501	0	0	0	catimbau	0	C. sinebrachiatus	BSLM	sand	91
shaded	sand	55.7634	0.01793	0.03587	0.0538	catimbau	0	C. sinebrachiatus	BSLM	sand	92
exposed	sand	24.1275	0	0	0	catimbau	0	C. sinebrachiatus	BSLM	sand	93
shaded	sand	73.2307	0	0.02731	0.02731	catimbau	0	C. sinebrachiatus	BSLM	sand	94
exposed	sand	118.187	0	0	0	catimbau	0	C. sinebrachiatus	BSLM	sand	95
exposed	no sand	42.5058	0	0	0	catimbau	0	C. sinebrachiatus	BSLM	sand	96
exposed	no sand	98.0179	0	0	0	catimbau	0	C. sinebrachiatus	BSLM	sand	97
shaded	no sand	77.519	0.0129	0.0387	0.0516	catimbau	0	C. sinebrachiatus	BSLM	sand	98
shaded	no sand	38.4846	0.02598	0.02598	0.05197	catimbau	0	C. sinebrachiatus	BSLM	sand	99
shaded	no sand	137.366	0	0.00728	0.00728	catimbau	0	C. sinebrachiatus	BSLM	sand	100
exposed	no sand	113.098	0	0	0	catimbau	0	C. sinebrachiatus	BSLM	sand	101
exposed	no sand	72.0683	0	0	0	catimbau	0	C. sinebrachiatus	BSLM	sand	102
exposed	no sand	81.8073	0	0	0	catimbau	0	C. sinebrachiatus	BSLM	sand	103
shaded	no sand	68.0471	0	0	0	catimbau	0	C. sinebrachiatus	BSLM	sand	104
exposed	no sand	7.0686	0	0	0	catimbau	0	C. sinebrachiatus	BSLM	sand	105
shaded	no sand	135.717	0	0.00737	0.00737	catimbau	0	C. sinebrachiatus	BSLM	sand	106
shaded	no sand	10.6814	0.09362	0	0.09362	catimbau	0	C. sinebrachiatus	BSLM	sand	107
exposed	no sand	40.7151	0	0	0	catimbau	0	C. sinebrachiatus	BSLM	sand	108
exposed	no sand	95.5046	0	0	0	catimbau	0	C. sinebrachiatus	BSLM	sand	109
exposed	no sand	11.781	0	0	0	catimbau	0	C. sinebrachiatus	BSLM	sand	110
shaded	no sand	15.8965	0	0	0	catimbau	0	C. sinebrachiatus	BSLM	sand	111
exposed	no sand	18.7868	0	0	0	catimbau	0	C. sinebrachiatus	BSLM	sand	112
exposed	no sand	26.9549	0	0	0	catimbau	0	C. sinebrachiatus	BSLM	sand	113
exposed	no sand	12.0637	0	0	0	catimbau	0	C. sinebrachiatus	BSLM	sand	114
shaded	no sand	93.117	0	0.02148	0.02148	catimbau	0	C. sinebrachiatus	BSLM	sand	115
exposed	no sand	12.4407	0	0	0	catimbau	0	C. sinebrachiatus	BSLM	sand	116
exposed	no sand	82.3728	0	0	0	catimbau	0	C. sinebrachiatus	BSLM	sand	117
shaded	no sand	9.6133	0	0.10402	0.10402	catimbau	0	C. sinebrachiatus	BSLM	sand	118
shaded	no sand	25.1328	0	0	0	catimbau	0	C. sinebrachiatus	BSLM	sand	119
shaded	no sand	23.562	0	0.04244	0.04244	catimbau	0	C. sinebrachiatus	BSLM	sand	120
shaded	no sand	30.1594	0	0	0	catimbau	0	C. sinebrachiatus	BSLM	sand	121
exposed	no sand	42.7258	0	0	0	catimbau	0	C. sinebrachiatus	BSLM	sand	122
exposed	no sand	58.1196	0	0	0	catimbau	0	C. sinebrachiatus	BSLM	sand	123
exposed	no sand	32.0443	0	0	0	catimbau	0	C. sinebrachiatus	BSLM	sand	124
exposed	no sand	80.582	0	0	0	catimbau	0	C. sinebrachiatus	BSLM	sand	125
shaded	no sand	9.89604	0.10105	0	0.10105	catimbau	0	C. sinebrachiatus	BSLM	sand	126
shaded	no sand	6.78586	0.14737	0	0.14737	catimbau	0	C. sinebrachiatus	BSLM	sand	127
shaded	no sand	38.6998	0.05168	0.05168	0.10336	catimbau	0	C. sinebrachiatus	BSLM	sand	128
exposed	no sand	67.7329	0	0	0	catimbau	0	C. sinebrachiatus	BSLM	sand	129
exposed	no sand	34.5576	0	0	0	catimbau	0	C. sinebrachiatus	BSLM	sand	130
exposed	no sand	15.708	0	0	0	catimbau	0	C. sinebrachiatus	BSLM	sand	131
exposed	no sand	27.0492	0	0	0	catimbau	0	C. sinebrachiatus	BSLM	sand	132
shaded	no sand	75.3984	0	0.02653	0.02653	catimbau	0	C. sinebrachiatus	BSLM	sand	133
shaded	no sand	92.4887	0	0	0	catimbau	0	C. sinebrachiatus	BSLM	sand	134
shaded	no sand	12.7235	0.23578	0	0.23578	catimbau	0	C. sinebrachiatus	BSLM	sand	135
shaded	no sand	19.7921	0.10105	0.05053	0.15158	catimbau	0	C. sinebrachiatus	BSLM	sand	136
exposed	no sand	25.1328	0	0	0	catimbau	0	C. sinebrachiatus	BSLM	sand	137
exposed	no sand	45.082	0	0	0	catimbau	0	C. sinebrachiatus	BSLM	sand	138
exposed	no sand	34.0864	0	0	0	catimbau	0	C. sinebrachiatus	BSLM	sand	139
exposed	no sand	16.9646	0	0	0	catimbau	0	C. sinebrachiatus	BSLM	sand	140
exposed	no sand	17.8129	0	0	0	catimbau	0	C. sinebrachiatus	BSLM	sand	141
exposed	no sand	8.16816	0	0	0	catimbau	0	C. sinebrachiatus	BSLM	sand	142
exposed	no sand	16.0222	0	0	0	catimbau	0	C. sinebrachiatus	BSLM	sand	143
shaded	no sand	22.8708	0	0.04372	0.04372	catimbau	0	C. sinebrachiatus	BSLM	sand	144
shaded	no sand	47.6895	0	0	0	catimbau	0	C. sinebrachiatus	BSLM	sand	145
exposed	no sand	17.97	0	0	0	catimbau	0	C. sinebrachiatus	BSLM	sand	146
exposed	no sand	7.2571	0	0	0	catimbau	0	C. sinebrachiatus	BSLM	sand	147
exposed	no sand	15.8337	0	0	0	catimbau	0	C. sinebrachiatus	BSLM	sand	148
shaded	no sand	113.098	0	0.02653	0.02653	catimbau	0	C. sinebrachiatus	BSLM	sand	149
shaded	no sand	19.635	0.10186	0	0.10186	catimbau	0	C. sinebrachiatus	BSLM	sand	150
shaded	no sand	21.2372	0.04709	0	0.04709	catimbau	0	C. sinebrachiatus	BSLM	sand	151
exposed	sand	6.40886	0	0	0	catimbau	0	C. sinebrachiatus	BSLM	sand	152
exposed	sand	17.1531	0	0	0	catimbau	0	C. sinebrachiatus	BSLM	sand	153
exposed	sand	28.2744	0	0	0	catimbau	0	C. sinebrachiatus	BSLM	sand	154
exposed	sand	16.1164	0	0	0	catimbau	0	C. sinebrachiatus	BSLM	sand	155
exposed	sand	23.562	0	0	0	catimbau	0	C. sinebrachiatus	BSLM	sand	156
shaded	sand	56.0776	0.03566	0.01783	0.0535	catimbau	0	C. sinebrachiatus	BSLM	sand	157
shaded	sand	33.7094	0.05933	0	0.05933	catimbau	0	C. sinebrachiatus	BSLM	sand	158
exposed	sand	15.2053	0	0	0	catimbau	0	C. sinebrachiatus	BSLM	sand	159
exposed	sand	16.4934	0	0	0	catimbau	0	C. sinebrachiatus	BSLM	sand	160
exposed	sand	38.3589	0	0	0	catimbau	0	C. sinebrachiatus	BSLM	sand	161
exposed	sand	19.7921	0	0	0	catimbau	0	C. sinebrachiatus	BSLM	sand	162
exposed	sand	4.5239	0	0	0	catimbau	0	C. sinebrachiatus	BSLM	sand	163
shaded	sand	58.0568	0.03445	0.0689	0.10335	catimbau	0	C. sinebrachiatus	BSLM	sand	164
shaded	sand	103.673	0.01929	0	0.01929	catimbau	0	C. sinebrachiatus	BSLM	sand	165
exposed	sand	13.1947	0	0	0	catimbau	0	C. sinebrachiatus	BSLM	sand	166
exposed	sand	42.7258	0	0	0	catimbau	0	C. sinebrachiatus	BSLM	sand	167
exposed	sand	7.0686	0	0	0	catimbau	0	C. sinebrachiatus	BSLM	sand	168
shaded	sand	10.5558	0	0.09473	0.09473	catimbau	0	C. sinebrachiatus	BSLM	sand	169
shaded	sand	18.7868	0.05323	0	0.05323	catimbau	0	C. sinebrachiatus	BSLM	sand	170
shaded	sand	30.0651	0.03326	0.03326	0.06652	catimbau	0	C. sinebrachiatus	BSLM	sand	171
shaded	sand	88.3418	0.02264	0	0.02264	catimbau	0	C. sinebrachiatus	BSLM	sand	172
exposed	sand	11.3098	0	0	0	catimbau	0	C. sinebrachiatus	BSLM	sand	173
shaded	sand	15.2682	0.13099	0.0655	0.19649	catimbau	0	C. sinebrachiatus	BSLM	sand	174
exposed	sand	6.03187	0	0	0	catimbau	0	C. sinebrachiatus	BSLM	sand	175
exposed	sand	34.7775	0	0	0	catimbau	0	C. sinebrachiatus	BSLM	sand	176
exposed	sand	11.8752	0	0	0	catimbau	0	C. sinebrachiatus	BSLM	sand	177
shaded	sand	23.7505	0	0.08421	0.08421	catimbau	0	C. sinebrachiatus	BSLM	sand	178
exposed	sand	15.8337	0	0	0	catimbau	0	C. sinebrachiatus	BSLM	sand	179
exposed	sand	2.82744	0	0	0	catimbau	0	C. sinebrachiatus	BSLM	sand	180
shaded	sand	18.7868	0.05323	0.05323	0.10646	catimbau	0	C. sinebrachiatus	BSLM	sand	181
exposed	sand	11.3098	0	0	0	catimbau	0	C. sinebrachiatus	BSLM	sand	182
shaded	sand	6.44895	0	0.15506	0.15506	Gameleira	0	C. sinebrachiatus	BSLM	no sand	183
shaded	sand	3.55424	0	0	0	Gameleira	0	C. sinebrachiatus	BSLM	no sand	184
shaded	no sand	3.84354	0	0	0	Gameleira	0	C. sinebrachiatus	BSLM	no sand	185
shaded	no sand	7.22342	0	0.13844	0.13844	Gameleira	0	C. sinebrachiatus	BSLM	no sand	186
exposed	no sand	8.3436	0	0	0	Gameleira	0	C. sinebrachiatus	BSLM	no sand	187
exposed	no sand	2.25345	0	0	0	Gameleira	0	C. sinebrachiatus	BSLM	no sand	188
exposed	no sand	2.7543	0	0	0	Gameleira	0	C. sinebrachiatus	BSLM	no sand	189
exposed	sand	95.8188	0	0	0	Gameleira	0	C. sinebrachiatus	BSLM	no sand	190
shaded	sand	197.921	0	0	0	Gameleira	0	C. sinebrachiatus	BSLM	no sand	191
exposed	sand	169.646	0	0	0	Gameleira	0	C. sinebrachiatus	BSLM	no sand	192
exposed	sand	226.195	0	0	0	Gameleira	0	C. sinebrachiatus	BSLM	no sand	193
exposed	sand	197.921	0	0	0	Gameleira	0	C. sinebrachiatus	BSLM	no sand	194
shaded	sand	117.339	0	0.01704	0.01704	Gameleira	0	C. sinebrachiatus	BSLM	no sand	195
shaded	sand	173.165	0	0	0	Gameleira	0	C. sinebrachiatus	BSLM	no sand	196
shaded	sand	268.607	0	0	0	Gameleira	0	C. sinebrachiatus	BSLM	no sand	197
shaded	sand	226.195	0	0.00442	0.00442	Gameleira	0	C. sinebrachiatus	BSLM	no sand	198
shaded	sand	50.2656	0	0	0	Gameleira	0	C. sinebrachiatus	BSLM	no sand	199
shaded	sand	113.098	0	0.01768	0.01768	Gameleira	0	C. sinebrachiatus	BSLM	no sand	200
shaded	sand	107.348	0	0.00932	0.00932	Gameleira	0	C. sinebrachiatus	BSLM	no sand	201
shaded	sand	120.763	0	0.01656	0.01656	Gameleira	0	C. sinebrachiatus	BSLM	no sand	202
exposed	sand	178.883	0	0	0	Gameleira	0	C. sinebrachiatus	BSLM	no sand	203
exposed	sand	133.832	0	0	0	Gameleira	0	C. sinebrachiatus	BSLM	no sand	204
exposed	sand	227.515	0	0	0	Gameleira	0	C. sinebrachiatus	BSLM	no sand	205
exposed	sand	178.443	0	0	0	Gameleira	0	C. sinebrachiatus	BSLM	no sand	206
exposed	sand	408.816	0	0	0	Gameleira	0	C. sinebrachiatus	BSLM	no sand	207
exposed	sand	100.94	0	0	0	Gameleira	0	C. sinebrachiatus	BSLM	no sand	208
shaded	sand	128.397	0	0	0	Gameleira	0	C. sinebrachiatus	BSLM	no sand	209
shaded	sand	158.337	0	0	0	Gameleira	0	C. sinebrachiatus	BSLM	no sand	210
shaded	sand	100.28	0	0	0	Gameleira	0	C. sinebrachiatus	BSLM	no sand	211
shaded	sand	197.858	0	0	0	Gameleira	0	C. sinebrachiatus	BSLM	no sand	212
shaded	sand	78.3515	0	0	0	Gameleira	0	C. sinebrachiatus	BSLM	no sand	213
exposed	sand	125.79	0	0	0	Gameleira	0	C. sinebrachiatus	BSLM	no sand	214
exposed	no sand	124.407	0	0	0	Gameleira	0	C. sinebrachiatus	BSLM	no sand	215
exposed	no sand	107.348	0	0	0	Gameleira	0	C. sinebrachiatus	BSLM	no sand	216
shaded	no sand	95.8188	0	0	0	Gameleira	0	C. sinebrachiatus	BSLM	no sand	217
shaded	no sand	88.2475	0	0	0	Gameleira	0	C. sinebrachiatus	BSLM	no sand	218
exposed	no sand	109.265	0	0	0	Gameleira	0	C. sinebrachiatus	BSLM	no sand	219
exposed	no sand	109.516	0	0	0	Gameleira	0	C. sinebrachiatus	BSLM	no sand	220
exposed	no sand	57.5855	0	0	0	Gameleira	0	C. sinebrachiatus	BSLM	no sand	221
shaded	no sand	219.912	0	0.00455	0.00455	Gameleira	0	C. sinebrachiatus	BSLM	no sand	222
shaded	no sand	5.54356	0	0	0	Gameleira	0	C. sinebrachiatus	BSLM	no sand	223
shaded	no sand	86.7082	0	0	0	Gameleira	0	C. sinebrachiatus	BSLM	no sand	224
exposed	no sand	81.4303	0	0	0	Gameleira	0	C. sinebrachiatus	BSLM	no sand	225
exposed	no sand	43.9824	0	0	0	Gameleira	0	C. sinebrachiatus	BSLM	no sand	226
shaded	no sand	216.77	0	0	0	Gameleira	0	C. sinebrachiatus	BSLM	no sand	227
shaded	no sand	162.107	0	0.01851	0.01851	Gameleira	0	C. sinebrachiatus	BSLM	no sand	228
exposed	sand	99.5259	0	0	0	pedra vermelha	0	C. sinebrachiatus	BSLM	no sand	229
shaded	sand	143.163	0	0	0	pedra vermelha	0	C. sinebrachiatus	BSLM	no sand	230
exposed	sand	4.56	0	0	0	pedra vermelha	0	C. sinebrachiatus	BSLM	no sand	231
shaded	no sand	54.2868	0	0	0	pedra vermelha	0	C. sinebrachiatus	BSLM	no sand	232
exposed	sand	119.381	0	0	0	pedra vermelha	0	C. sinebrachiatus	BSLM	no sand	233
shaded	sand	89.1586	0	0.03365	0.03365	pedra vermelha	0	C. sinebrachiatus	BSLM	no sand	234
shaded	sand	111.087	0	0	0	pedra vermelha	0	C. sinebrachiatus	BSLM	no sand	235
shaded	sand	73.8276	0	0.01355	0.01355	pedra vermelha	0	C. sinebrachiatus	BSLM	no sand	236
exposed	sand	80.9276	0	0	0	pedra vermelha	0	C. sinebrachiatus	BSLM	no sand	237
exposed	sand	118.501	0	0	0	pedra vermelha	0	C. sinebrachiatus	BSLM	no sand	238
shaded	sand	33.9293	0.35368	0.02947	0.38315	pedra vermelha	12	C. sinebrachiatus	BSLM	sand	239
shaded	sand	95.002	0.03158	0.02105	0.05263	pedra vermelha	3	C. sinebrachiatus	BSLM	sand	240
shaded	sand	151.739	0	0	0	pedra vermelha	0	C. sinebrachiatus	BSLM	sand	241
exposed	sand	20.8288	0.04801	0	0.04801	pedra vermelha	1	C. sinebrachiatus	BSLM	sand	242
shaded	sand	27.3319	0.03659	0	0.03659	pedra vermelha	1	C. sinebrachiatus	BSLM	sand	243
shaded	sand	19.635	0.05093	0	0.05093	pedra vermelha	1	C. sinebrachiatus	BSLM	sand	244
exposed	sand	15.708	0	0	0	pedra vermelha	0	C. sinebrachiatus	BSLM	sand	245
shaded	sand	6.2832	0	0	0	pedra vermelha	0	C. sinebrachiatus	BSLM	sand	246
shaded	sand	8.01108	0	0	0	pedra vermelha	0	C. sinebrachiatus	BSLM	sand	247
exposed	sand	14.1372	0	0	0	pedra vermelha	0	C. sinebrachiatus	BSLM	sand	248
shaded	sand	37.6992	0	0	0	pedra vermelha	0	C. sinebrachiatus	BSLM	sand	249
exposed	sand	12.5664	0	0	0	pedra vermelha	0	C. sinebrachiatus	BSLM	sand	250
shaded	sand	62.832	0	0	0	pedra vermelha	0	C. sinebrachiatus	BSLM	sand	251
exposed	sand	14.5142	0	0	0	pedra vermelha	0	C. sinebrachiatus	BSLM	sand	252
shaded	sand	7.0686	0	0	0	pedra vermelha	0	C. sinebrachiatus	BSLM	sand	253
shaded	sand	34.5576	0	0	0	pedra vermelha	0	C. sinebrachiatus	BSLM	sand	254
shaded	sand	7.0686	0.14147	0	0.14147	pedra vermelha	1	C. sinebrachiatus	BSLM	sand	255
shaded	sand	25.6355	0	0	0	pedra vermelha	0	C. sinebrachiatus	BSLM	sand	256
exposed	sand	21.677	0	0	0	pedra vermelha	0	C. sinebrachiatus	BSLM	sand	257
shaded	sand	17.3416	0	0	0	pedra vermelha	0	C. sinebrachiatus	BSLM	sand	258
exposed	sand	18.0956	0	0	0	pedra vermelha	0	C. sinebrachiatus	BSLM	sand	259
shaded	sand	86.7082	0.02307	0	0.02307	pedra vermelha	2	C. sinebrachiatus	BSLM	sand	260
shaded	sand	46.6528	0.0643	0.02143	0.08574	pedra vermelha	3	C. sinebrachiatus	BSLM	sand	261
shaded	sand	34.8718	0.02868	0.02868	0.05735	vacaria	0	C. sinebrachiatus	BSLM	sand	262
shaded	sand	48.0665	0.0208	0	0.0208	vacaria	0	C. sinebrachiatus	BSLM	sand	263
exposed	sand	36.9452	0	0	0	vacaria	0	C. sinebrachiatus	BSLM	sand	264
exposed	sand	47.2811	0	0	0	vacaria	0	C. sinebrachiatus	BSLM	sand	265
shaded	sand	47.124	0.04244	0.04244	0.08488	vacaria	0	C. sinebrachiatus	BSLM	sand	266
shaded	sand	24.1903	0.12402	0.04134	0.16536	vacaria	0	C. sinebrachiatus	BSLM	sand	267
exposed	sand	31.1018	0	0	0	vacaria	0	C. sinebrachiatus	BSLM	sand	268
exposed	sand	32.0443	0	0	0	vacaria	0	C. sinebrachiatus	BSLM	sand	269
shaded	sand	32.9868	0	0	0	vacaria	0	C. sinebrachiatus	BSLM	sand	270
shaded	sand	49.4802	0	0	0	vacaria	0	C. sinebrachiatus	BSLM	sand	271
shaded	sand	62.832	0	0.01592	0.01592	vacaria	0	C. sinebrachiatus	BSLM	no sand	272
shaded	sand	81.0533	0	0	0	vacaria	0	C. sinebrachiatus	BSLM	no sand	273
shaded	sand	169.646	0	0.01768	0.01768	pedra vermelha	0	C. sinebrachiatus	BSLM	no sand	274
shaded	sand	203.513	0	0.01965	0.01965	pedra vermelha	0	C. sinebrachiatus	BSLM	no sand	275
shaded	sand	31.1647	0	0.03209	0.03209	pedra vermelha	0	C. sinebrachiatus	BSLM	no sand	276
shaded	sand	141.372	0.02122	0	0.02122	alagoado	0	N.ablephara	BSLM	sand	1
shaded	sand	169.646	0.00589	0.00589	0.01179	alagoado	0	N.ablephara	BSLM	sand	2
exposed	sand	125.664	0	0	0	alagoado	0	N.ablephara	BSLM	sand	3
shaded	sand	75.3984	0.03979	0.02653	0.06631	alagoado	0	N.ablephara	BSLM	sand	4
exposed	sand	113.098	0	0	0	alagoado	0	N.ablephara	BSLM	sand	5
exposed	sand	113.098	0	0	0	alagoado	0	N.ablephara	BSLM	sand	6
shaded	sand	282.744	0.01415	0.01061	0.02476	alagoado	1	N.ablephara	BSLM	sand	7
shaded	sand	175.93	0	0.00568	0.00568	alagoado	0	N.ablephara	BSLM	sand	8
exposed	sand	94.248	0	0	0	alagoado	0	N.ablephara	BSLM	sand	9
shaded	sand	376.992	0.00796	0.00531	0.01326	alagoado	0	N.ablephara	BSLM	sand	10
exposed	sand	125.664	0	0	0	alagoado	0	N.ablephara	BSLM	sand	11
exposed	sand	122.522	0	0	0	alagoado	0	N.ablephara	BSLM	sand	12
shaded	sand	138.23	0.0217	0.00723	0.02894	alagoado	0	N.ablephara	BSLM	sand	13
shaded	sand	113.098	0.04421	0	0.04421	alagoado	0	N.ablephara	BSLM	sand layer	14
shaded	sand	153.938	0.03898	0	0.03898	alagoado	0	N.ablephara	BSLM	sand layer	15
shaded	sand	28.2744	0.03537	0	0.03537	alagoado	1	N.ablephara	BSLM	sand layer	16
exposed	sand	28.2744	0	0	0	alagoado	0	N.ablephara	BSLM	sand layer	17
exposed	sand	28.2744	0	0	0	alagoado	0	N.ablephara	BSLM	sand layer	18
exposed	sand	56.5488	0	0	0	alagoado	0	N.ablephara	BSLM	sand layer	19
shaded	sand	530.93	0.04332	0	0.04332	alagoado	3	N.ablephara	BSLM	sand layer	20
exposed	sand	207.346	0	0	0	alagoado	0	N.ablephara	BSLM	sand layer	21
shaded	sand	28.2744	0	0	0	alagoado	0	N.ablephara	BSLM	sand layer	22
shaded	sand	28.2744	0.03537	0	0.03537	alagoado	0	N.ablephara	BSLM	sand	23
shaded	sand	12.5664	0	0	0	alagoado	0	N.ablephara	BSLM	sand	24
exposed	sand	78.54	0	0	0	alagoado	0	N.ablephara	BSLM	sand	25
shaded	sand	87.9648	0	0.01137	0.01137	alagoado	0	N.ablephara	BSLM	sand	26
shaded	sand	25.1328	0.03979	0	0.03979	alagoado	0	N.ablephara	BSLM	sand	27
shaded	sand	37.6992	0	0.07958	0.07958	alagoado	0	N.ablephara	BSLM	sand	28
exposed	sand	18.8496	0	0	0	alagoado	0	N.ablephara	BSLM	sand	29
exposed	sand	37.6992	0	0	0	alagoado	0	N.ablephara	BSLM	sand	30
exposed	sand	78.54	0	0	0	alagoado	0	N.ablephara	BSLM	sand	31
shaded	sand	31.416	0	0.06366	0.06366	alagoado	0	N.ablephara	BSLM	sand	32
shaded	sand	28.2744	0.03537	0.07074	0.1061	alagoado	1	N.ablephara	BSLM	sand	33
exposed	sand	50.2656	0	0	0	alagoado	0	N.ablephara	BSLM	sand	34
shaded	sand	109.956	0.05457	0.00909	0.06366	alagoado	2	N.ablephara	BSLM	sand layer	35
shaded	sand	188.496	0	0.01061	0.01061	alagoado	0	N.ablephara	BSLM	sand layer	36
exposed	sand	226.195	0	0	0	alagoado	0	N.ablephara	BSLM	sand layer	37
exposed	sand	141.372	0	0	0	alagoado	0	N.ablephara	BSLM	sand layer	38
exposed	sand	75.3984	0.03979	0.01326	0.05305	alagoado	0	N.ablephara	BSLM	sand layer	39
shaded	sand	50.2656	0	0	0	alagoado	0	N.ablephara	BSLM	sand layer	40
exposed	sand	62.832	0	0	0	alagoado	0	N.ablephara	BSLM	sand layer	41
exposed	sand	75.3984	0	0	0	alagoado	0	N.ablephara	BSLM	sand layer	42
shaded	sand	94.248	0.01061	0	0.01061	alagoado	0	N.ablephara	BSLM	sand layer	43
shaded	sand	131.947	0	0	0	alagoado	0	N.ablephara	BSLM	sand layer	44
exposed	sand	62.832	0	0	0	alagoado	0	N.ablephara	BSLM	sand layer	45
exposed	sand	94.248	0	0	0	alagoado	0	N.ablephara	BSLM	sand layer	46
shaded	sand	94.248	0	0	0	alagoado	0	N.ablephara	BSLM	no sand	47
shaded	sand	109.956	0.00909	0	0.00909	alagoado	1	N.ablephara	BSLM	no sand	48
shaded	sand	50.2656	0	0	0	alagoado	0	N.ablephara	BSLM	no sand	49
shaded	sand	47.124	0	0	0	alagoado	0	N.ablephara	BSLM	no sand	50
exposed	sand	78.54	0	0	0	alagoado	0	N.ablephara	BSLM	no sand	51
exposed	sand	56.5488	0	0	0	alagoado	0	N.ablephara	BSLM	no sand	52
shaded	sand	78.54	0.02546	0.02546	0.05093	alagoado	2	N.ablephara	BSLM	no sand	53
shaded	sand	201.062	0.00497	0.00995	0.01492	alagoado	1	N.ablephara	BSLM	no sand	54
exposed	sand	94.248	0	0	0	alagoado	0	N.ablephara	BSLM	no sand	55
exposed	sand	245.045	0	0	0	alagoado	0	N.ablephara	BSLM	no sand	56
shaded	sand	62.832	0.04775	0.03183	0.07958	alagoado	0	N.ablephara	BSLM	sand layer	57
shaded	sand	197.921	0.06063	0.02526	0.08589	alagoado	0	N.ablephara	BSLM	sand layer	58
exposed	sand	94.248	0	0	0	alagoado	0	N.ablephara	BSLM	sand layer	59
shaded	no sand	50.2656	0.03979	0.05968	0.09947	alagoado	0	N.ablephara	BSLM	sand layer	60
exposed	no sand	56.5488	0	0	0	alagoado	0	N.ablephara	BSLM	sand layer	61
shaded	no sand	251.328	0.01989	0.00398	0.02387	alagoado	0	N.ablephara	BSLM	sand layer	62
shaded	no sand	131.947	0.06821	0.00758	0.07579	alagoado	2	N.ablephara	BSLM	sand layer	63
exposed	no sand	109.956	0.00909	0	0.00909	alagoado	1	N.ablephara	BSLM	sand layer	64
exposed	no sand	87.9648	0	0	0	alagoado	0	N.ablephara	BSLM	sand layer	65
shaded	no sand	50.2656	0.01989	0.03979	0.05968	alagoado	0	N.ablephara	BSLM	sand layer	66
shaded	no sand	75.3984	0.06631	0.01326	0.07958	alagoado	0	N.ablephara	BSLM	sand layer	67
shaded	no sand	50.2656	0.13926	0.03979	0.17905	alagoado	0	N.ablephara	BSLM	sand layer	68
exposed	no sand	37.6992	0	0	0	alagoado	0	N.ablephara	BSLM	sand layer	69
exposed	no sand	37.6992	0	0	0	alagoado	0	N.ablephara	BSLM	sand layer	70
exposed	no sand	56.5488	0	0	0	alagoado	0	N.ablephara	BSLM	sand layer	71
shaded	no sand	201.062	0.00995	0	0.00995	alagoado	0	N.ablephara	BSLM	no sand	72
shaded	no sand	62.832	0	0	0	alagoado	0	N.ablephara	BSLM	no sand	73
shaded	no sand	87.9648	0	0	0	alagoado	0	N.ablephara	BSLM	no sand	74
shaded	no sand	87.9648	0	0	0	alagoado	0	N.ablephara	BSLM	no sand	75
shaded	no sand	50.2656	0.01989	0.01989	0.03979	alagoado	0	N.ablephara	BSLM	sand	76
shaded	no sand	28.2744	0.03537	0.1061	0.14147	alagoado	0	N.ablephara	BSLM	sand	77
shaded	no sand	47.124	0.02122	0.02122	0.04244	alagoado	0	N.ablephara	BSLM	sand	78
shaded	no sand	78.54	0	0	0	alagoado	0	N.ablephara	BSLM	no sand	79
shaded	no sand	10.0531	0	0	0	catimbau	0	N.ablephara	BSLM	sand	80
exposed	no sand	65.6594	0	0	0	catimbau	0	N.ablephara	BSLM	sand	81
exposed	no sand	34.212	0	0	0	catimbau	0	N.ablephara	BSLM	sand	82
exposed	no sand	32.0443	0	0	0	catimbau	0	N.ablephara	BSLM	sand	83
exposed	no sand	22.054	0	0	0	catimbau	0	N.ablephara	BSLM	sand	84
exposed	no sand	91.6091	0	0	0	catimbau	0	N.ablephara	BSLM	sand	85
shaded	no sand	20.4204	0	0	0	catimbau	0	N.ablephara	BSLM	sand	86
shaded	no sand	7.75975	0.12887	0	0.12887	catimbau	0	N.ablephara	BSLM	sand	87
shaded	no sand	32.2014	0	0.03105	0.03105	catimbau	0	N.ablephara	BSLM	sand	88
shaded	no sand	164.934	0.00606	0	0.00606	catimbau	0	N.ablephara	BSLM	sand	89
exposed	no sand	153.153	0	0	0	catimbau	0	N.ablephara	BSLM	sand	90
exposed	no sand	47.501	0	0	0	catimbau	0	N.ablephara	BSLM	sand	91
shaded	no sand	55.7634	0.01793	0.03587	0.0538	catimbau	0	N.ablephara	BSLM	sand	92
exposed	no sand	24.1275	0	0	0	catimbau	0	N.ablephara	BSLM	sand	93
shaded	no sand	73.2307	0	0.02731	0.02731	catimbau	0	N.ablephara	BSLM	sand	94
exposed	no sand	118.187	0	0	0	catimbau	0	N.ablephara	BSLM	sand	95
exposed	no sand	42.5058	0	0	0	catimbau	0	N.ablephara	BSLM	sand	96
exposed	no sand	98.0179	0	0	0	catimbau	0	N.ablephara	BSLM	sand	97
shaded	no sand	77.519	0.0129	0.0387	0.0516	catimbau	0	N.ablephara	BSLM	sand	98
shaded	no sand	38.4846	0.02598	0.02598	0.05197	catimbau	0	N.ablephara	BSLM	sand	99
shaded	no sand	137.366	0	0.00728	0.00728	catimbau	0	N.ablephara	BSLM	sand	100
exposed	no sand	113.098	0	0	0	catimbau	0	N.ablephara	BSLM	sand	101
exposed	no sand	72.0683	0	0	0	catimbau	0	N.ablephara	BSLM	sand	102
exposed	no sand	81.8073	0	0	0	catimbau	0	N.ablephara	BSLM	sand	103
shaded	no sand	68.0471	0	0	0	catimbau	0	N.ablephara	BSLM	sand	104
exposed	no sand	7.0686	0	0	0	catimbau	0	N.ablephara	BSLM	sand	105
shaded	no sand	135.717	0	0.00737	0.00737	catimbau	0	N.ablephara	BSLM	sand	106
shaded	no sand	10.6814	0.09362	0	0.09362	catimbau	0	N.ablephara	BSLM	sand	107
exposed	no sand	40.7151	0	0	0	catimbau	0	N.ablephara	BSLM	sand	108
exposed	no sand	95.5046	0	0	0	catimbau	0	N.ablephara	BSLM	sand	109
exposed	no sand	11.781	0	0	0	catimbau	0	N.ablephara	BSLM	sand	110
shaded	no sand	15.8965	0	0	0	catimbau	0	N.ablephara	BSLM	sand	111
exposed	no sand	18.7868	0	0	0	catimbau	0	N.ablephara	BSLM	sand	112
exposed	no sand	26.9549	0	0	0	catimbau	0	N.ablephara	BSLM	sand	113
exposed	no sand	12.0637	0	0	0	catimbau	0	N.ablephara	BSLM	sand	114
shaded	no sand	93.117	0	0.02148	0.02148	catimbau	0	N.ablephara	BSLM	sand	115
exposed	sand	12.4407	0	0	0	catimbau	0	N.ablephara	BSLM	sand	116
exposed	sand	82.3728	0	0	0	catimbau	0	N.ablephara	BSLM	sand	117
shaded	sand	9.6133	0	0.10402	0.10402	catimbau	0	N.ablephara	BSLM	sand	118
shaded	sand	25.1328	0	0	0	catimbau	0	N.ablephara	BSLM	sand	119
shaded	sand	23.562	0	0.04244	0.04244	catimbau	0	N.ablephara	BSLM	sand	120
shaded	sand	30.1594	0	0	0	catimbau	0	N.ablephara	BSLM	sand	121
exposed	sand	42.7258	0	0	0	catimbau	0	N.ablephara	BSLM	sand	122
exposed	sand	58.1196	0	0	0	catimbau	0	N.ablephara	BSLM	sand	123
exposed	sand	32.0443	0	0	0	catimbau	0	N.ablephara	BSLM	sand	124
exposed	sand	80.582	0	0	0	catimbau	0	N.ablephara	BSLM	sand	125
shaded	sand	9.89604	0.10105	0	0.10105	catimbau	0	N.ablephara	BSLM	sand	126
shaded	sand	6.78586	0.14737	0	0.14737	catimbau	0	N.ablephara	BSLM	sand	127
shaded	sand	38.6998	0.05168	0.05168	0.10336	catimbau	0	N.ablephara	BSLM	sand	128
exposed	sand	67.7329	0	0	0	catimbau	0	N.ablephara	BSLM	sand	129
exposed	sand	34.5576	0	0	0	catimbau	0	N.ablephara	BSLM	sand	130
exposed	sand	15.708	0	0	0	catimbau	0	N.ablephara	BSLM	sand	131
exposed	sand	27.0492	0	0	0	catimbau	0	N.ablephara	BSLM	sand	132
shaded	sand	75.3984	0	0.02653	0.02653	catimbau	0	N.ablephara	BSLM	sand	133
shaded	sand	92.4887	0	0	0	catimbau	0	N.ablephara	BSLM	sand	134
shaded	sand	12.7235	0.23578	0	0.23578	catimbau	0	N.ablephara	BSLM	sand	135
shaded	sand	19.7921	0.10105	0.05053	0.15158	catimbau	0	N.ablephara	BSLM	sand	136
exposed	sand	25.1328	0	0	0	catimbau	0	N.ablephara	BSLM	sand	137
exposed	sand	45.082	0	0	0	catimbau	0	N.ablephara	BSLM	sand	138
exposed	sand	34.0864	0	0	0	catimbau	0	N.ablephara	BSLM	sand	139
exposed	sand	16.9646	0	0	0	catimbau	0	N.ablephara	BSLM	sand	140
exposed	sand	17.8129	0	0	0	catimbau	0	N.ablephara	BSLM	sand	141
exposed	sand	8.16816	0	0	0	catimbau	0	N.ablephara	BSLM	sand	142
exposed	sand	16.0222	0	0	0	catimbau	0	N.ablephara	BSLM	sand	143
shaded	sand	22.8708	0	0.04372	0.04372	catimbau	0	N.ablephara	BSLM	sand	144
shaded	sand	47.6895	0	0	0	catimbau	0	N.ablephara	BSLM	sand	145
exposed	sand	17.97	0	0	0	catimbau	0	N.ablephara	BSLM	sand	146
exposed	sand	7.2571	0	0	0	catimbau	0	N.ablephara	BSLM	sand	147
exposed	sand	15.8337	0	0	0	catimbau	0	N.ablephara	BSLM	sand	148
shaded	no sand	113.098	0	0.02653	0.02653	catimbau	0	N.ablephara	BSLM	sand	149
shaded	no sand	19.635	0.10186	0	0.10186	catimbau	0	N.ablephara	BSLM	sand	150
shaded	no sand	21.2372	0.04709	0	0.04709	catimbau	0	N.ablephara	BSLM	sand	151
exposed	no sand	6.40886	0	0	0	catimbau	0	N.ablephara	BSLM	sand	152
exposed	no sand	17.1531	0	0	0	catimbau	0	N.ablephara	BSLM	sand	153
exposed	sand	28.2744	0	0	0	catimbau	0	N.ablephara	BSLM	sand	154
exposed	sand	16.1164	0	0	0	catimbau	0	N.ablephara	BSLM	sand	155
exposed	sand	23.562	0	0	0	catimbau	0	N.ablephara	BSLM	sand	156
shaded	sand	56.0776	0.03566	0.01783	0.0535	catimbau	0	N.ablephara	BSLM	sand	157
shaded	sand	33.7094	0.05933	0	0.05933	catimbau	0	N.ablephara	BSLM	sand	158
exposed	sand	15.2053	0	0	0	catimbau	0	N.ablephara	BSLM	sand	159
exposed	sand	16.4934	0	0	0	catimbau	0	N.ablephara	BSLM	sand	160
exposed	sand	38.3589	0	0	0	catimbau	0	N.ablephara	BSLM	sand	161
exposed	sand	19.7921	0	0	0	catimbau	0	N.ablephara	BSLM	sand	162
exposed	sand	4.5239	0	0	0	catimbau	0	N.ablephara	BSLM	sand	163
shaded	sand	58.0568	0.03445	0.0689	0.10335	catimbau	0	N.ablephara	BSLM	sand	164
shaded	sand	103.673	0.01929	0	0.01929	catimbau	0	N.ablephara	BSLM	sand	165
exposed	sand	13.1947	0	0	0	catimbau	0	N.ablephara	BSLM	sand	166
exposed	sand	42.7258	0	0	0	catimbau	0	N.ablephara	BSLM	sand	167
exposed	sand	7.0686	0	0	0	catimbau	0	N.ablephara	BSLM	sand	168
shaded	sand	10.5558	0	0.09473	0.09473	catimbau	0	N.ablephara	BSLM	sand	169
shaded	sand	18.7868	0.05323	0	0.05323	catimbau	0	N.ablephara	BSLM	sand	170
shaded	sand	30.0651	0.03326	0.03326	0.06652	catimbau	0	N.ablephara	BSLM	sand	171
shaded	sand	88.3418	0.02264	0	0.02264	catimbau	0	N.ablephara	BSLM	sand	172
exposed	sand	11.3098	0	0	0	catimbau	0	N.ablephara	BSLM	sand	173
shaded	sand	15.2682	0.13099	0.0655	0.19649	catimbau	0	N.ablephara	BSLM	sand	174
exposed	sand	6.03187	0	0	0	catimbau	0	N.ablephara	BSLM	sand	175
exposed	sand	34.7775	0	0	0	catimbau	0	N.ablephara	BSLM	sand	176
exposed	sand	11.8752	0	0	0	catimbau	0	N.ablephara	BSLM	sand	177
shaded	sand	23.7505	0	0.08421	0.08421	catimbau	0	N.ablephara	BSLM	sand	178
exposed	no sand	15.8337	0	0	0	catimbau	0	N.ablephara	BSLM	sand	179
exposed	no sand	2.82744	0	0	0	catimbau	0	N.ablephara	BSLM	sand	180
shaded	no sand	18.7868	0.05323	0.05323	0.10646	catimbau	0	N.ablephara	BSLM	sand	181
exposed	no sand	11.3098	0	0	0	catimbau	0	N.ablephara	BSLM	sand	182
shaded	no sand	6.44895	0	0.15506	0.15506	Gameleira	0	N.ablephara	BSLM	no sand	183
shaded	no sand	3.55424	0	0	0	Gameleira	0	N.ablephara	BSLM	no sand	184
shaded	no sand	3.84354	0	0	0	Gameleira	0	N.ablephara	BSLM	no sand	185
shaded	no sand	7.22342	0	0.13844	0.13844	Gameleira	0	N.ablephara	BSLM	no sand	186
exposed	no sand	8.3436	0	0	0	Gameleira	0	N.ablephara	BSLM	no sand	187
exposed	no sand	2.25345	0	0	0	Gameleira	0	N.ablephara	BSLM	no sand	188
exposed	no sand	2.7543	0	0	0	Gameleira	0	N.ablephara	BSLM	no sand	189
exposed	no sand	95.8188	0	0	0	Gameleira	0	N.ablephara	BSLM	no sand	190
shaded	no sand	197.921	0	0	0	Gameleira	0	N.ablephara	BSLM	no sand	191
exposed	no sand	169.646	0	0	0	Gameleira	0	N.ablephara	BSLM	no sand	192
exposed	sand	226.195	0	0	0	Gameleira	0	N.ablephara	BSLM	no sand	193
exposed	sand	197.921	0	0	0	Gameleira	0	N.ablephara	BSLM	no sand	194
shaded	sand	117.339	0	0.01704	0.01704	Gameleira	0	N.ablephara	BSLM	no sand	195
shaded	no sand	173.165	0	0	0	Gameleira	0	N.ablephara	BSLM	no sand	196
shaded	sand	268.607	0	0	0	Gameleira	0	N.ablephara	BSLM	no sand	197
shaded	sand	226.195	0	0.00442	0.00442	Gameleira	0	N.ablephara	BSLM	no sand	198
shaded	sand	50.2656	0	0	0	Gameleira	0	N.ablephara	BSLM	no sand	199
shaded	sand	113.098	0	0.01768	0.01768	Gameleira	0	N.ablephara	BSLM	no sand	200
shaded	sand	107.348	0	0.00932	0.00932	Gameleira	0	N.ablephara	BSLM	no sand	201
shaded	sand	120.763	0	0.01656	0.01656	Gameleira	0	N.ablephara	BSLM	no sand	202
exposed	sand	178.883	0	0	0	Gameleira	0	N.ablephara	BSLM	no sand	203
exposed	sand	133.832	0	0	0	Gameleira	0	N.ablephara	BSLM	no sand	204
exposed	sand	227.515	0	0	0	Gameleira	0	N.ablephara	BSLM	no sand	205
exposed	sand	178.443	0	0	0	Gameleira	0	N.ablephara	BSLM	no sand	206
exposed	sand	408.816	0	0	0	Gameleira	0	N.ablephara	BSLM	no sand	207
exposed	sand	100.94	0	0	0	Gameleira	0	N.ablephara	BSLM	no sand	208
shaded	sand	128.397	0	0	0	Gameleira	0	N.ablephara	BSLM	no sand	209
shaded	sand	158.337	0	0	0	Gameleira	0	N.ablephara	BSLM	no sand	210
shaded	sand	100.28	0	0	0	Gameleira	0	N.ablephara	BSLM	no sand	211
shaded	sand	197.858	0	0	0	Gameleira	0	N.ablephara	BSLM	no sand	212
shaded	sand	78.3515	0	0	0	Gameleira	0	N.ablephara	BSLM	no sand	213
exposed	sand	125.79	0	0	0	Gameleira	0	N.ablephara	BSLM	no sand	214
exposed	sand	124.407	0	0	0	Gameleira	0	N.ablephara	BSLM	no sand	215
exposed	sand	107.348	0	0	0	Gameleira	0	N.ablephara	BSLM	no sand	216
shaded	sand	95.8188	0	0	0	Gameleira	0	N.ablephara	BSLM	no sand	217
shaded	sand	88.2475	0	0	0	Gameleira	0	N.ablephara	BSLM	no sand	218
exposed	sand	109.265	0	0	0	Gameleira	0	N.ablephara	BSLM	no sand	219
exposed	sand	109.516	0	0	0	Gameleira	0	N.ablephara	BSLM	no sand	220
exposed	sand	57.5855	0	0	0	Gameleira	0	N.ablephara	BSLM	no sand	221
shaded	sand	219.912	0	0.00455	0.00455	Gameleira	0	N.ablephara	BSLM	no sand	222
shaded	sand	5.54356	0	0	0	Gameleira	0	N.ablephara	BSLM	no sand	223
shaded	sand	86.7082	0	0	0	Gameleira	0	N.ablephara	BSLM	no sand	224
exposed	sand	81.4303	0	0	0	Gameleira	0	N.ablephara	BSLM	no sand	225
exposed	sand	43.9824	0	0	0	Gameleira	0	N.ablephara	BSLM	no sand	226
shaded	sand	216.77	0	0	0	Gameleira	0	N.ablephara	BSLM	no sand	227
shaded	sand	162.107	0	0.01851	0.01851	Gameleira	0	N.ablephara	BSLM	no sand	228
exposed	sand	99.5259	0	0	0	pedra vermelha	0	N.ablephara	BSLM	no sand	229
shaded	sand	143.163	0	0	0	pedra vermelha	0	N.ablephara	BSLM	no sand	230
exposed	sand	4.56	0	0	0	pedra vermelha	0	N.ablephara	BSLM	no sand	231
shaded	sand	54.2868	0	0	0	pedra vermelha	0	N.ablephara	BSLM	no sand	232
exposed	sand	119.381	0	0	0	pedra vermelha	0	N.ablephara	BSLM	no sand	233
shaded	sand	89.1586	0	0.03365	0.03365	pedra vermelha	0	N.ablephara	BSLM	no sand	234
shaded	sand	111.087	0	0	0	pedra vermelha	0	N.ablephara	BSLM	no sand	235
shaded	sand	73.8276	0	0.01355	0.01355	pedra vermelha	0	N.ablephara	BSLM	no sand	236
exposed	sand	80.9276	0	0	0	pedra vermelha	0	N.ablephara	BSLM	no sand	237
exposed	sand	118.501	0	0	0	pedra vermelha	0	N.ablephara	BSLM	no sand	238
shaded	sand	33.9293	0.35368	0.02947	0.38315	pedra vermelha	0	N.ablephara	BSLM	sand	239
shaded	sand	95.002	0.03158	0.02105	0.05263	pedra vermelha	0	N.ablephara	BSLM	sand	240
shaded	sand	151.739	0	0	0	pedra vermelha	0	N.ablephara	BSLM	sand	241
exposed	sand	20.8288	0.04801	0	0.04801	pedra vermelha	0	N.ablephara	BSLM	sand	242
shaded	sand	27.3319	0.03659	0	0.03659	pedra vermelha	0	N.ablephara	BSLM	sand	243
shaded	sand	19.635	0.05093	0	0.05093	pedra vermelha	0	N.ablephara	BSLM	sand	244
exposed	sand	15.708	0	0	0	pedra vermelha	0	N.ablephara	BSLM	sand	245
shaded	sand	6.2832	0	0	0	pedra vermelha	0	N.ablephara	BSLM	sand	246
shaded	sand	8.01108	0	0	0	pedra vermelha	0	N.ablephara	BSLM	sand	247
exposed	sand	14.1372	0	0	0	pedra vermelha	0	N.ablephara	BSLM	sand	248
shaded	sand	37.6992	0	0	0	pedra vermelha	0	N.ablephara	BSLM	sand	249
exposed	sand	12.5664	0	0	0	pedra vermelha	0	N.ablephara	BSLM	sand	250
shaded	sand	62.832	0	0	0	pedra vermelha	0	N.ablephara	BSLM	sand	251
exposed	sand	14.5142	0	0	0	pedra vermelha	0	N.ablephara	BSLM	sand	252
shaded	sand	7.0686	0	0	0	pedra vermelha	0	N.ablephara	BSLM	sand	253
shaded	sand	34.5576	0	0	0	pedra vermelha	0	N.ablephara	BSLM	sand	254
shaded	sand	7.0686	0.14147	0	0.14147	pedra vermelha	0	N.ablephara	BSLM	sand	255
shaded	sand	25.6355	0	0	0	pedra vermelha	0	N.ablephara	BSLM	sand	256
exposed	sand	21.677	0	0	0	pedra vermelha	0	N.ablephara	BSLM	sand	257
shaded	sand	17.3416	0	0	0	pedra vermelha	0	N.ablephara	BSLM	sand	258
exposed	sand	18.0956	0	0	0	pedra vermelha	0	N.ablephara	BSLM	sand	259
shaded	sand	86.7082	0.02307	0	0.02307	pedra vermelha	0	N.ablephara	BSLM	sand	260
shaded	sand	46.6528	0.0643	0.02143	0.08574	pedra vermelha	0	N.ablephara	BSLM	sand	261
shaded	sand	34.8718	0.02868	0.02868	0.05735	vacaria	0	N.ablephara	BSLM	sand	262
shaded	sand	48.0665	0.0208	0	0.0208	vacaria	0	N.ablephara	BSLM	sand	263
exposed	sand	36.9452	0	0	0	vacaria	0	N.ablephara	BSLM	sand	264
exposed	sand	47.2811	0	0	0	vacaria	0	N.ablephara	BSLM	sand	265
shaded	sand	47.124	0.04244	0.04244	0.08488	vacaria	0	N.ablephara	BSLM	sand	266
shaded	sand	24.1903	0.12402	0.04134	0.16536	vacaria	0	N.ablephara	BSLM	sand	267
exposed	sand	31.1018	0	0	0	vacaria	0	N.ablephara	BSLM	sand	268
exposed	sand	32.0443	0	0	0	vacaria	0	N.ablephara	BSLM	sand	269
shaded	sand	32.9868	0	0	0	vacaria	0	N.ablephara	BSLM	sand	270
shaded	sand	49.4802	0	0	0	vacaria	0	N.ablephara	BSLM	sand	271
shaded	sand	62.832	0	0.01592	0.01592	vacaria	0	N.ablephara	BSLM	no sand	272
shaded	sand	81.0533	0	0	0	vacaria	0	N.ablephara	BSLM	no sand	273
shaded	sand	169.646	0	0.01768	0.01768	pedra vermelha	0	N.ablephara	BSLM	no sand	274
shaded	sand	203.513	0	0.01965	0.01965	pedra vermelha	0	N.ablephara	BSLM	no sand	275
shaded	sand	31.1647	0	0.03209	0.03209	pedra vermelha	0	N.ablephara	BSLM	no sand	276
shaded	sand	141.372	0.02122	0	0.02122	alagoado	0	S.catimbau	BSLM	sand	1
shaded	sand	169.646	0.00589	0.00589	0.01179	alagoado	0	S.catimbau	BSLM	sand	2
exposed	sand	125.664	0	0	0	alagoado	0	S.catimbau	BSLM	sand	3
shaded	sand	75.3984	0.03979	0.02653	0.06631	alagoado	0	S.catimbau	BSLM	sand	4
exposed	sand	113.098	0	0	0	alagoado	0	S.catimbau	BSLM	sand	5
exposed	sand	113.098	0	0	0	alagoado	0	S.catimbau	BSLM	sand	6
shaded	sand	282.744	0.01415	0.01061	0.02476	alagoado	0	S.catimbau	BSLM	sand	7
shaded	sand	175.93	0	0.00568	0.00568	alagoado	0	S.catimbau	BSLM	sand	8
exposed	sand	94.248	0	0	0	alagoado	0	S.catimbau	BSLM	sand	9
shaded	sand	376.992	0.00796	0.00531	0.01326	alagoado	0	S.catimbau	BSLM	sand	10
exposed	sand	125.664	0	0	0	alagoado	0	S.catimbau	BSLM	sand	11
exposed	sand	122.522	0	0	0	alagoado	0	S.catimbau	BSLM	sand	12
shaded	sand	138.23	0.0217	0.00723	0.02894	alagoado	0	S.catimbau	BSLM	sand	13
shaded	sand	113.098	0.04421	0	0.04421	alagoado	0	S.catimbau	BSLM	sand layer	14
shaded	sand	153.938	0.03898	0	0.03898	alagoado	0	S.catimbau	BSLM	sand layer	15
shaded	sand	28.2744	0.03537	0	0.03537	alagoado	0	S.catimbau	BSLM	sand layer	16
exposed	sand	28.2744	0	0	0	alagoado	0	S.catimbau	BSLM	sand layer	17
exposed	sand	28.2744	0	0	0	alagoado	0	S.catimbau	BSLM	sand layer	18
exposed	sand	56.5488	0	0	0	alagoado	0	S.catimbau	BSLM	sand layer	19
shaded	sand	530.93	0.04332	0	0.04332	alagoado	0	S.catimbau	BSLM	sand layer	20
exposed	sand	207.346	0	0	0	alagoado	0	S.catimbau	BSLM	sand layer	21
shaded	sand	28.2744	0	0	0	alagoado	0	S.catimbau	BSLM	sand layer	22
shaded	sand	28.2744	0.03537	0	0.03537	alagoado	0	S.catimbau	BSLM	sand	23
shaded	no sand	12.5664	0	0	0	alagoado	0	S.catimbau	BSLM	sand	24
exposed	no sand	78.54	0	0	0	alagoado	0	S.catimbau	BSLM	sand	25
shaded	no sand	87.9648	0	0.01137	0.01137	alagoado	0	S.catimbau	BSLM	sand	26
shaded	no sand	25.1328	0.03979	0	0.03979	alagoado	0	S.catimbau	BSLM	sand	27
shaded	no sand	37.6992	0	0.07958	0.07958	alagoado	0	S.catimbau	BSLM	sand	28
exposed	no sand	18.8496	0	0	0	alagoado	0	S.catimbau	BSLM	sand	29
exposed	no sand	37.6992	0	0	0	alagoado	0	S.catimbau	BSLM	sand	30
exposed	no sand	78.54	0	0	0	alagoado	0	S.catimbau	BSLM	sand	31
shaded	no sand	31.416	0	0.06366	0.06366	alagoado	0	S.catimbau	BSLM	sand	32
shaded	no sand	28.2744	0.03537	0.07074	0.1061	alagoado	0	S.catimbau	BSLM	sand	33
exposed	no sand	50.2656	0	0	0	alagoado	0	S.catimbau	BSLM	sand	34
shaded	no sand	109.956	0.05457	0.00909	0.06366	alagoado	0	S.catimbau	BSLM	sand layer	35
shaded	no sand	188.496	0	0.01061	0.01061	alagoado	0	S.catimbau	BSLM	sand layer	36
exposed	no sand	226.195	0	0	0	alagoado	0	S.catimbau	BSLM	sand layer	37
exposed	no sand	141.372	0	0	0	alagoado	0	S.catimbau	BSLM	sand layer	38
exposed	no sand	75.3984	0.03979	0.01326	0.05305	alagoado	0	S.catimbau	BSLM	sand layer	39
shaded	no sand	50.2656	0	0	0	alagoado	0	S.catimbau	BSLM	sand layer	40
exposed	no sand	62.832	0	0	0	alagoado	0	S.catimbau	BSLM	sand layer	41
exposed	no sand	75.3984	0	0	0	alagoado	0	S.catimbau	BSLM	sand layer	42
shaded	no sand	94.248	0.01061	0	0.01061	alagoado	0	S.catimbau	BSLM	sand layer	43
shaded	no sand	131.947	0	0	0	alagoado	0	S.catimbau	BSLM	sand layer	44
exposed	no sand	62.832	0	0	0	alagoado	0	S.catimbau	BSLM	sand layer	45
exposed	no sand	94.248	0	0	0	alagoado	0	S.catimbau	BSLM	sand layer	46
shaded	no sand	94.248	0	0	0	alagoado	0	S.catimbau	BSLM	no sand	47
shaded	no sand	109.956	0.00909	0	0.00909	alagoado	0	S.catimbau	BSLM	no sand	48
shaded	no sand	50.2656	0	0	0	alagoado	0	S.catimbau	BSLM	no sand	49
shaded	no sand	47.124	0	0	0	alagoado	0	S.catimbau	BSLM	no sand	50
exposed	no sand	78.54	0	0	0	alagoado	0	S.catimbau	BSLM	no sand	51
exposed	no sand	56.5488	0	0	0	alagoado	0	S.catimbau	BSLM	no sand	52
shaded	no sand	78.54	0.02546	0.02546	0.05093	alagoado	0	S.catimbau	BSLM	no sand	53
shaded	no sand	201.062	0.00497	0.00995	0.01492	alagoado	0	S.catimbau	BSLM	no sand	54
exposed	no sand	94.248	0	0	0	alagoado	0	S.catimbau	BSLM	no sand	55
exposed	no sand	245.045	0	0	0	alagoado	0	S.catimbau	BSLM	no sand	56
shaded	no sand	62.832	0.04775	0.03183	0.07958	alagoado	0	S.catimbau	BSLM	sand layer	57
shaded	no sand	197.921	0.06063	0.02526	0.08589	alagoado	0	S.catimbau	BSLM	sand layer	58
exposed	no sand	94.248	0	0	0	alagoado	0	S.catimbau	BSLM	sand layer	59
shaded	no sand	50.2656	0.03979	0.05968	0.09947	alagoado	0	S.catimbau	BSLM	sand layer	60
exposed	no sand	56.5488	0	0	0	alagoado	0	S.catimbau	BSLM	sand layer	61
shaded	no sand	251.328	0.01989	0.00398	0.02387	alagoado	0	S.catimbau	BSLM	sand layer	62
shaded	no sand	131.947	0.06821	0.00758	0.07579	alagoado	0	S.catimbau	BSLM	sand layer	63
exposed	no sand	109.956	0.00909	0	0.00909	alagoado	0	S.catimbau	BSLM	sand layer	64
exposed	no sand	87.9648	0	0	0	alagoado	0	S.catimbau	BSLM	sand layer	65
shaded	no sand	50.2656	0.01989	0.03979	0.05968	alagoado	0	S.catimbau	BSLM	sand layer	66
shaded	no sand	75.3984	0.06631	0.01326	0.07958	alagoado	0	S.catimbau	BSLM	sand layer	67
shaded	no sand	50.2656	0.13926	0.03979	0.17905	alagoado	0	S.catimbau	BSLM	sand layer	68
exposed	no sand	37.6992	0	0	0	alagoado	0	S.catimbau	BSLM	sand layer	69
exposed	no sand	37.6992	0	0	0	alagoado	0	S.catimbau	BSLM	sand layer	70
exposed	no sand	56.5488	0	0	0	alagoado	0	S.catimbau	BSLM	sand layer	71
shaded	no sand	201.062	0.00995	0	0.00995	alagoado	0	S.catimbau	BSLM	no sand	72
shaded	no sand	62.832	0	0	0	alagoado	0	S.catimbau	BSLM	no sand	73
shaded	no sand	87.9648	0	0	0	alagoado	0	S.catimbau	BSLM	no sand	74
shaded	no sand	87.9648	0	0	0	alagoado	0	S.catimbau	BSLM	no sand	75
shaded	no sand	50.2656	0.01989	0.01989	0.03979	alagoado	0	S.catimbau	BSLM	sand	76
shaded	no sand	28.2744	0.03537	0.1061	0.14147	alagoado	0	S.catimbau	BSLM	sand	77
shaded	no sand	47.124	0.02122	0.02122	0.04244	alagoado	0	S.catimbau	BSLM	sand	78
shaded	no sand	78.54	0	0	0	alagoado	0	S.catimbau	BSLM	no sand	79
shaded	sand	10.0531	0	0	0	catimbau	0	S.catimbau	BSLM	sand	80
exposed	sand	65.6594	0	0	0	catimbau	0	S.catimbau	BSLM	sand	81
exposed	sand	34.212	0	0	0	catimbau	0	S.catimbau	BSLM	sand	82
exposed	sand	32.0443	0	0	0	catimbau	0	S.catimbau	BSLM	sand	83
exposed	sand	22.054	0	0	0	catimbau	0	S.catimbau	BSLM	sand	84
exposed	sand	91.6091	0	0	0	catimbau	0	S.catimbau	BSLM	sand	85
shaded	sand	20.4204	0	0	0	catimbau	0	S.catimbau	BSLM	sand	86
shaded	sand	7.75975	0.12887	0	0.12887	catimbau	1	S.catimbau	BSLM	sand	87
shaded	sand	32.2014	0	0.03105	0.03105	catimbau	0	S.catimbau	BSLM	sand	88
shaded	sand	164.934	0.00606	0	0.00606	catimbau	1	S.catimbau	BSLM	sand	89
exposed	sand	153.153	0	0	0	catimbau	0	S.catimbau	BSLM	sand	90
exposed	sand	47.501	0	0	0	catimbau	0	S.catimbau	BSLM	sand	91
shaded	sand	55.7634	0.01793	0.03587	0.0538	catimbau	1	S.catimbau	BSLM	sand	92
exposed	sand	24.1275	0	0	0	catimbau	0	S.catimbau	BSLM	sand	93
shaded	sand	73.2307	0	0.02731	0.02731	catimbau	0	S.catimbau	BSLM	sand	94
exposed	sand	118.187	0	0	0	catimbau	0	S.catimbau	BSLM	sand	95
exposed	sand	42.5058	0	0	0	catimbau	0	S.catimbau	BSLM	sand	96
exposed	sand	98.0179	0	0	0	catimbau	0	S.catimbau	BSLM	sand	97
shaded	sand	77.519	0.0129	0.0387	0.0516	catimbau	1	S.catimbau	BSLM	sand	98
shaded	sand	38.4846	0.02598	0.02598	0.05197	catimbau	1	S.catimbau	BSLM	sand	99
shaded	sand	137.366	0	0.00728	0.00728	catimbau	0	S.catimbau	BSLM	sand	100
exposed	sand	113.098	0	0	0	catimbau	0	S.catimbau	BSLM	sand	101
exposed	sand	72.0683	0	0	0	catimbau	0	S.catimbau	BSLM	sand	102
exposed	sand	81.8073	0	0	0	catimbau	0	S.catimbau	BSLM	sand	103
shaded	sand	68.0471	0	0	0	catimbau	0	S.catimbau	BSLM	sand	104
exposed	sand	7.0686	0	0	0	catimbau	0	S.catimbau	BSLM	sand	105
shaded	sand	135.717	0	0.00737	0.00737	catimbau	0	S.catimbau	BSLM	sand	106
shaded	sand	10.6814	0.09362	0	0.09362	catimbau	1	S.catimbau	BSLM	sand	107
exposed	sand	40.7151	0	0	0	catimbau	0	S.catimbau	BSLM	sand	108
exposed	sand	95.5046	0	0	0	catimbau	0	S.catimbau	BSLM	sand	109
exposed	sand	11.781	0	0	0	catimbau	0	S.catimbau	BSLM	sand	110
shaded	sand	15.8965	0	0	0	catimbau	0	S.catimbau	BSLM	sand	111
exposed	sand	18.7868	0	0	0	catimbau	0	S.catimbau	BSLM	sand	112
exposed	no sand	26.9549	0	0	0	catimbau	0	S.catimbau	BSLM	sand	113
exposed	no sand	12.0637	0	0	0	catimbau	0	S.catimbau	BSLM	sand	114
shaded	no sand	93.117	0	0.02148	0.02148	catimbau	0	S.catimbau	BSLM	sand	115
exposed	no sand	12.4407	0	0	0	catimbau	0	S.catimbau	BSLM	sand	116
exposed	no sand	82.3728	0	0	0	catimbau	0	S.catimbau	BSLM	sand	117
shaded	sand	9.6133	0	0.10402	0.10402	catimbau	0	S.catimbau	BSLM	sand	118
shaded	sand	25.1328	0	0	0	catimbau	0	S.catimbau	BSLM	sand	119
shaded	sand	23.562	0	0.04244	0.04244	catimbau	0	S.catimbau	BSLM	sand	120
shaded	sand	30.1594	0	0	0	catimbau	0	S.catimbau	BSLM	sand	121
exposed	sand	42.7258	0	0	0	catimbau	0	S.catimbau	BSLM	sand	122
exposed	sand	58.1196	0	0	0	catimbau	0	S.catimbau	BSLM	sand	123
exposed	sand	32.0443	0	0	0	catimbau	0	S.catimbau	BSLM	sand	124
exposed	sand	80.582	0	0	0	catimbau	0	S.catimbau	BSLM	sand	125
shaded	sand	9.89604	0.10105	0	0.10105	catimbau	1	S.catimbau	BSLM	sand	126
shaded	sand	6.78586	0.14737	0	0.14737	catimbau	1	S.catimbau	BSLM	sand	127
shaded	sand	38.6998	0.05168	0.05168	0.10336	catimbau	2	S.catimbau	BSLM	sand	128
exposed	sand	67.7329	0	0	0	catimbau	0	S.catimbau	BSLM	sand	129
exposed	sand	34.5576	0	0	0	catimbau	0	S.catimbau	BSLM	sand	130
exposed	sand	15.708	0	0	0	catimbau	0	S.catimbau	BSLM	sand	131
exposed	sand	27.0492	0	0	0	catimbau	0	S.catimbau	BSLM	sand	132
shaded	sand	75.3984	0	0.02653	0.02653	catimbau	0	S.catimbau	BSLM	sand	133
shaded	sand	92.4887	0	0	0	catimbau	0	S.catimbau	BSLM	sand	134
shaded	sand	12.7235	0.23578	0	0.23578	catimbau	3	S.catimbau	BSLM	sand	135
shaded	sand	19.7921	0.10105	0.05053	0.15158	catimbau	2	S.catimbau	BSLM	sand	136
exposed	sand	25.1328	0	0	0	catimbau	0	S.catimbau	BSLM	sand	137
exposed	sand	45.082	0	0	0	catimbau	0	S.catimbau	BSLM	sand	138
exposed	sand	34.0864	0	0	0	catimbau	0	S.catimbau	BSLM	sand	139
exposed	sand	16.9646	0	0	0	catimbau	0	S.catimbau	BSLM	sand	140
exposed	sand	17.8129	0	0	0	catimbau	0	S.catimbau	BSLM	sand	141
exposed	sand	8.16816	0	0	0	catimbau	0	S.catimbau	BSLM	sand	142
exposed	no sand	16.0222	0	0	0	catimbau	0	S.catimbau	BSLM	sand	143
shaded	no sand	22.8708	0	0.04372	0.04372	catimbau	0	S.catimbau	BSLM	sand	144
shaded	no sand	47.6895	0	0	0	catimbau	0	S.catimbau	BSLM	sand	145
exposed	no sand	17.97	0	0	0	catimbau	0	S.catimbau	BSLM	sand	146
exposed	no sand	7.2571	0	0	0	catimbau	0	S.catimbau	BSLM	sand	147
exposed	no sand	15.8337	0	0	0	catimbau	0	S.catimbau	BSLM	sand	148
shaded	no sand	113.098	0	0.02653	0.02653	catimbau	0	S.catimbau	BSLM	sand	149
shaded	no sand	19.635	0.10186	0	0.10186	catimbau	2	S.catimbau	BSLM	sand	150
shaded	no sand	21.2372	0.04709	0	0.04709	catimbau	1	S.catimbau	BSLM	sand	151
exposed	no sand	6.40886	0	0	0	catimbau	0	S.catimbau	BSLM	sand	152
exposed	no sand	17.1531	0	0	0	catimbau	0	S.catimbau	BSLM	sand	153
exposed	no sand	28.2744	0	0	0	catimbau	0	S.catimbau	BSLM	sand	154
exposed	no sand	16.1164	0	0	0	catimbau	0	S.catimbau	BSLM	sand	155
exposed	no sand	23.562	0	0	0	catimbau	0	S.catimbau	BSLM	sand	156
shaded	sand	56.0776	0.03566	0.01783	0.0535	catimbau	2	S.catimbau	BSLM	sand	157
shaded	sand	33.7094	0.05933	0	0.05933	catimbau	2	S.catimbau	BSLM	sand	158
exposed	sand	15.2053	0	0	0	catimbau	0	S.catimbau	BSLM	sand	159
exposed	no sand	16.4934	0	0	0	catimbau	0	S.catimbau	BSLM	sand	160
exposed	sand	38.3589	0	0	0	catimbau	0	S.catimbau	BSLM	sand	161
exposed	sand	19.7921	0	0	0	catimbau	0	S.catimbau	BSLM	sand	162
exposed	sand	4.5239	0	0	0	catimbau	0	S.catimbau	BSLM	sand	163
shaded	sand	58.0568	0.03445	0.0689	0.10335	catimbau	2	S.catimbau	BSLM	sand	164
shaded	sand	103.673	0.01929	0	0.01929	catimbau	2	S.catimbau	BSLM	sand	165
exposed	sand	13.1947	0	0	0	catimbau	0	S.catimbau	BSLM	sand	166
exposed	sand	42.7258	0	0	0	catimbau	0	S.catimbau	BSLM	sand	167
exposed	sand	7.0686	0	0	0	catimbau	0	S.catimbau	BSLM	sand	168
shaded	sand	10.5558	0	0.09473	0.09473	catimbau	0	S.catimbau	BSLM	sand	169
shaded	sand	18.7868	0.05323	0	0.05323	catimbau	1	S.catimbau	BSLM	sand	170
shaded	sand	30.0651	0.03326	0.03326	0.06652	catimbau	1	S.catimbau	BSLM	sand	171
shaded	sand	88.3418	0.02264	0	0.02264	catimbau	2	S.catimbau	BSLM	sand	172
exposed	sand	11.3098	0	0	0	catimbau	0	S.catimbau	BSLM	sand	173
shaded	sand	15.2682	0.13099	0.0655	0.19649	catimbau	2	S.catimbau	BSLM	sand	174
exposed	sand	6.03187	0	0	0	catimbau	0	S.catimbau	BSLM	sand	175
exposed	sand	34.7775	0	0	0	catimbau	0	S.catimbau	BSLM	sand	176
exposed	sand	11.8752	0	0	0	catimbau	0	S.catimbau	BSLM	sand	177
shaded	sand	23.7505	0	0.08421	0.08421	catimbau	0	S.catimbau	BSLM	sand	178
exposed	sand	15.8337	0	0	0	catimbau	0	S.catimbau	BSLM	sand	179
exposed	sand	2.82744	0	0	0	catimbau	0	S.catimbau	BSLM	sand	180
shaded	sand	18.7868	0.05323	0.05323	0.10646	catimbau	1	S.catimbau	BSLM	sand	181
exposed	sand	11.3098	0	0	0	catimbau	0	S.catimbau	BSLM	sand	182
shaded	sand	6.44895	0	0.15506	0.15506	Gameleira	0	S.catimbau	BSLM	no sand	183
shaded	sand	3.55424	0	0	0	Gameleira	0	S.catimbau	BSLM	no sand	184
shaded	sand	3.84354	0	0	0	Gameleira	0	S.catimbau	BSLM	no sand	185
shaded	sand	7.22342	0	0.13844	0.13844	Gameleira	0	S.catimbau	BSLM	no sand	186
exposed	sand	8.3436	0	0	0	Gameleira	0	S.catimbau	BSLM	no sand	187
exposed	sand	2.25345	0	0	0	Gameleira	0	S.catimbau	BSLM	no sand	188
exposed	sand	2.7543	0	0	0	Gameleira	0	S.catimbau	BSLM	no sand	189
exposed	sand	95.8188	0	0	0	Gameleira	0	S.catimbau	BSLM	no sand	190
shaded	sand	197.921	0	0	0	Gameleira	0	S.catimbau	BSLM	no sand	191
exposed	sand	169.646	0	0	0	Gameleira	0	S.catimbau	BSLM	no sand	192
exposed	sand	226.195	0	0	0	Gameleira	0	S.catimbau	BSLM	no sand	193
exposed	sand	197.921	0	0	0	Gameleira	0	S.catimbau	BSLM	no sand	194
shaded	sand	117.339	0	0.01704	0.01704	Gameleira	0	S.catimbau	BSLM	no sand	195
shaded	sand	173.165	0	0	0	Gameleira	0	S.catimbau	BSLM	no sand	196
shaded	sand	268.607	0	0	0	Gameleira	0	S.catimbau	BSLM	no sand	197
shaded	sand	226.195	0	0.00442	0.00442	Gameleira	0	S.catimbau	BSLM	no sand	198
shaded	sand	50.2656	0	0	0	Gameleira	0	S.catimbau	BSLM	no sand	199
shaded	sand	113.098	0	0.01768	0.01768	Gameleira	0	S.catimbau	BSLM	no sand	200
shaded	sand	107.348	0	0.00932	0.00932	Gameleira	0	S.catimbau	BSLM	no sand	201
shaded	sand	120.763	0	0.01656	0.01656	Gameleira	0	S.catimbau	BSLM	no sand	202
exposed	sand	178.883	0	0	0	Gameleira	0	S.catimbau	BSLM	no sand	203
exposed	sand	133.832	0	0	0	Gameleira	0	S.catimbau	BSLM	no sand	204
exposed	sand	227.515	0	0	0	Gameleira	0	S.catimbau	BSLM	no sand	205
exposed	sand	178.443	0	0	0	Gameleira	0	S.catimbau	BSLM	no sand	206
exposed	sand	408.816	0	0	0	Gameleira	0	S.catimbau	BSLM	no sand	207
exposed	sand	100.94	0	0	0	Gameleira	0	S.catimbau	BSLM	no sand	208
shaded	sand	128.397	0	0	0	Gameleira	0	S.catimbau	BSLM	no sand	209
shaded	sand	158.337	0	0	0	Gameleira	0	S.catimbau	BSLM	no sand	210
shaded	sand	100.28	0	0	0	Gameleira	0	S.catimbau	BSLM	no sand	211
shaded	sand	197.858	0	0	0	Gameleira	0	S.catimbau	BSLM	no sand	212
shaded	sand	78.3515	0	0	0	Gameleira	0	S.catimbau	BSLM	no sand	213
exposed	sand	125.79	0	0	0	Gameleira	0	S.catimbau	BSLM	no sand	214
exposed	sand	124.407	0	0	0	Gameleira	0	S.catimbau	BSLM	no sand	215
exposed	sand	107.348	0	0	0	Gameleira	0	S.catimbau	BSLM	no sand	216
shaded	sand	95.8188	0	0	0	Gameleira	0	S.catimbau	BSLM	no sand	217
shaded	sand	88.2475	0	0	0	Gameleira	0	S.catimbau	BSLM	no sand	218
exposed	sand	109.265	0	0	0	Gameleira	0	S.catimbau	BSLM	no sand	219
exposed	sand	109.516	0	0	0	Gameleira	0	S.catimbau	BSLM	no sand	220
exposed	sand	57.5855	0	0	0	Gameleira	0	S.catimbau	BSLM	no sand	221
shaded	sand	219.912	0	0.00455	0.00455	Gameleira	0	S.catimbau	BSLM	no sand	222
shaded	sand	5.54356	0	0	0	Gameleira	0	S.catimbau	BSLM	no sand	223
shaded	sand	86.7082	0	0	0	Gameleira	0	S.catimbau	BSLM	no sand	224
exposed	sand	81.4303	0	0	0	Gameleira	0	S.catimbau	BSLM	no sand	225
exposed	sand	43.9824	0	0	0	Gameleira	0	S.catimbau	BSLM	no sand	226
shaded	sand	216.77	0	0	0	Gameleira	0	S.catimbau	BSLM	no sand	227
shaded	sand	162.107	0	0.01851	0.01851	Gameleira	0	S.catimbau	BSLM	no sand	228
exposed	sand	99.5259	0	0	0	pedra vermelha	0	S.catimbau	BSLM	no sand	229
shaded	sand	143.163	0	0	0	pedra vermelha	0	S.catimbau	BSLM	no sand	230
exposed	sand	4.56	0	0	0	pedra vermelha	0	S.catimbau	BSLM	no sand	231
shaded	sand	54.2868	0	0	0	pedra vermelha	0	S.catimbau	BSLM	no sand	232
exposed	sand	119.381	0	0	0	pedra vermelha	0	S.catimbau	BSLM	no sand	233
shaded	sand	89.1586	0	0.03365	0.03365	pedra vermelha	0	S.catimbau	BSLM	no sand	234
shaded	sand	111.087	0	0	0	pedra vermelha	0	S.catimbau	BSLM	no sand	235
shaded	sand	73.8276	0	0.01355	0.01355	pedra vermelha	0	S.catimbau	BSLM	no sand	236
exposed	sand	80.9276	0	0	0	pedra vermelha	0	S.catimbau	BSLM	no sand	237
exposed	sand	118.501	0	0	0	pedra vermelha	0	S.catimbau	BSLM	no sand	238
shaded	sand	33.9293	0.35368	0.02947	0.38315	pedra vermelha	0	S.catimbau	BSLM	sand	239
shaded	sand	95.002	0.03158	0.02105	0.05263	pedra vermelha	0	S.catimbau	BSLM	sand	240
shaded	sand	151.739	0	0	0	pedra vermelha	0	S.catimbau	BSLM	sand	241
exposed	sand	20.8288	0.04801	0	0.04801	pedra vermelha	0	S.catimbau	BSLM	sand	242
shaded	sand	27.3319	0.03659	0	0.03659	pedra vermelha	0	S.catimbau	BSLM	sand	243
shaded	sand	19.635	0.05093	0	0.05093	pedra vermelha	0	S.catimbau	BSLM	sand	244
exposed	sand	15.708	0	0	0	pedra vermelha	0	S.catimbau	BSLM	sand	245
shaded	sand	6.2832	0	0	0	pedra vermelha	0	S.catimbau	BSLM	sand	246
shaded	sand	8.01108	0	0	0	pedra vermelha	0	S.catimbau	BSLM	sand	247
exposed	sand	14.1372	0	0	0	pedra vermelha	0	S.catimbau	BSLM	sand	248
shaded	sand	37.6992	0	0	0	pedra vermelha	0	S.catimbau	BSLM	sand	249
exposed	sand	12.5664	0	0	0	pedra vermelha	0	S.catimbau	BSLM	sand	250
shaded	sand	62.832	0	0	0	pedra vermelha	0	S.catimbau	BSLM	sand	251
exposed	sand	14.5142	0	0	0	pedra vermelha	0	S.catimbau	BSLM	sand	252
shaded	sand	7.0686	0	0	0	pedra vermelha	0	S.catimbau	BSLM	sand	253
shaded	sand	34.5576	0	0	0	pedra vermelha	0	S.catimbau	BSLM	sand	254
shaded	sand	7.0686	0.14147	0	0.14147	pedra vermelha	0	S.catimbau	BSLM	sand	255
shaded	sand	25.6355	0	0	0	pedra vermelha	0	S.catimbau	BSLM	sand	256
exposed	sand	21.677	0	0	0	pedra vermelha	0	S.catimbau	BSLM	sand	257
shaded	sand	17.3416	0	0	0	pedra vermelha	0	S.catimbau	BSLM	sand	258
exposed	sand	18.0956	0	0	0	pedra vermelha	0	S.catimbau	BSLM	sand	259
shaded	sand	86.7082	0.02307	0	0.02307	pedra vermelha	0	S.catimbau	BSLM	sand	260
shaded	sand	46.6528	0.0643	0.02143	0.08574	pedra vermelha	0	S.catimbau	BSLM	sand	261
shaded	sand	34.8718	0.02868	0.02868	0.05735	vacaria	0	S.catimbau	BSLM	sand	262
shaded	sand	48.0665	0.0208	0	0.0208	vacaria	0	S.catimbau	BSLM	sand	263
exposed	no sand	36.9452	0	0	0	vacaria	0	S.catimbau	BSLM	sand	264
exposed	no sand	47.2811	0	0	0	vacaria	0	S.catimbau	BSLM	sand	265
shaded	no sand	47.124	0.04244	0.04244	0.08488	vacaria	0	S.catimbau	BSLM	sand	266
shaded	no sand	24.1903	0.12402	0.04134	0.16536	vacaria	0	S.catimbau	BSLM	sand	267
exposed	no sand	31.1018	0	0	0	vacaria	0	S.catimbau	BSLM	sand	268
exposed	no sand	32.0443	0	0	0	vacaria	0	S.catimbau	BSLM	sand	269
shaded	no sand	32.9868	0	0	0	vacaria	0	S.catimbau	BSLM	sand	270
shaded	no sand	49.4802	0	0	0	vacaria	0	S.catimbau	BSLM	sand	271
shaded	no sand	62.832	0	0.01592	0.01592	vacaria	0	S.catimbau	BSLM	no sand	272
shaded	no sand	81.0533	0	0	0	vacaria	0	S.catimbau	BSLM	no sand	273
shaded	no sand	169.646	0	0.01768	0.01768	pedra vermelha	0	S.catimbau	BSLM	no sand	274
shaded	no sand	203.513	0	0.01965	0.01965	pedra vermelha	0	S.catimbau	BSLM	no sand	275
shaded	no sand	31.1647	0	0.03209	0.03209	pedra vermelha	0	S.catimbau	BSLM	no sand	276
shaded	no sand	141.372	0.02122	0	0.02122	alagoado	3	P.tetradactylus	Lacertoid	sand	1
shaded	no sand	169.646	0.00589	0.00589	0.01179	alagoado	1	P.tetradactylus	Lacertoid	sand	2
exposed	no sand	125.664	0	0	0	alagoado	0	P.tetradactylus	Lacertoid	sand	3
shaded	no sand	75.3984	0.03979	0.02653	0.06631	alagoado	2	P.tetradactylus	Lacertoid	sand	4
exposed	no sand	113.098	0	0	0	alagoado	0	P.tetradactylus	Lacertoid	sand	5
exposed	no sand	113.098	0	0	0	alagoado	0	P.tetradactylus	Lacertoid	sand	6
shaded	no sand	282.744	0.01415	0.01061	0.02476	alagoado	3	P.tetradactylus	Lacertoid	sand	7
shaded	no sand	175.93	0	0.00568	0.00568	alagoado	1	P.tetradactylus	Lacertoid	sand	8
exposed	no sand	94.248	0	0	0	alagoado	0	P.tetradactylus	Lacertoid	sand	9
shaded	no sand	376.992	0.00796	0.00531	0.01326	alagoado	2	P.tetradactylus	Lacertoid	sand	10
exposed	no sand	125.664	0	0	0	alagoado	0	P.tetradactylus	Lacertoid	sand	11
exposed	no sand	122.522	0	0	0	alagoado	0	P.tetradactylus	Lacertoid	sand	12
shaded	no sand	138.23	0.0217	0.00723	0.02894	alagoado	1	P.tetradactylus	Lacertoid	sand	13
shaded	no sand	113.098	0.04421	0	0.04421	alagoado	0	P.tetradactylus	Lacertoid	sand layer	14
shaded	no sand	153.938	0.03898	0	0.03898	alagoado	0	P.tetradactylus	Lacertoid	sand layer	15
shaded	no sand	28.2744	0.03537	0	0.03537	alagoado	0	P.tetradactylus	Lacertoid	sand layer	16
exposed	no sand	28.2744	0	0	0	alagoado	0	P.tetradactylus	Lacertoid	sand layer	17
exposed	no sand	28.2744	0	0	0	alagoado	0	P.tetradactylus	Lacertoid	sand layer	18
exposed	no sand	56.5488	0	0	0	alagoado	0	P.tetradactylus	Lacertoid	sand layer	19
shaded	no sand	530.93	0.04332	0	0.04332	alagoado	0	P.tetradactylus	Lacertoid	sand layer	20
exposed	no sand	207.346	0	0	0	alagoado	0	P.tetradactylus	Lacertoid	sand layer	21
shaded	no sand	28.2744	0	0	0	alagoado	0	P.tetradactylus	Lacertoid	sand layer	22
shaded	no sand	28.2744	0.03537	0	0.03537	alagoado	0	P.tetradactylus	Lacertoid	sand	23
shaded	no sand	12.5664	0	0	0	alagoado	0	P.tetradactylus	Lacertoid	sand	24
exposed	no sand	78.54	0	0	0	alagoado	0	P.tetradactylus	Lacertoid	sand	25
shaded	no sand	87.9648	0	0.01137	0.01137	alagoado	1	P.tetradactylus	Lacertoid	sand	26
shaded	no sand	25.1328	0.03979	0	0.03979	alagoado	0	P.tetradactylus	Lacertoid	sand	27
shaded	no sand	37.6992	0	0.07958	0.07958	alagoado	3	P.tetradactylus	Lacertoid	sand	28
exposed	no sand	18.8496	0	0	0	alagoado	0	P.tetradactylus	Lacertoid	sand	29
exposed	no sand	37.6992	0	0	0	alagoado	0	P.tetradactylus	Lacertoid	sand	30
exposed	no sand	78.54	0	0	0	alagoado	0	P.tetradactylus	Lacertoid	sand	31
shaded	no sand	31.416	0	0.06366	0.06366	alagoado	2	P.tetradactylus	Lacertoid	sand	32
shaded	no sand	28.2744	0.03537	0.07074	0.1061	alagoado	2	P.tetradactylus	Lacertoid	sand	33
exposed	no sand	50.2656	0	0	0	alagoado	0	P.tetradactylus	Lacertoid	sand	34
shaded	no sand	109.956	0.05457	0.00909	0.06366	alagoado	0	P.tetradactylus	Lacertoid	sand layer	35
shaded	no sand	188.496	0	0.01061	0.01061	alagoado	0	P.tetradactylus	Lacertoid	sand layer	36
exposed	no sand	226.195	0	0	0	alagoado	0	P.tetradactylus	Lacertoid	sand layer	37
exposed	no sand	141.372	0	0	0	alagoado	0	P.tetradactylus	Lacertoid	sand layer	38
exposed	no sand	75.3984	0.03979	0.01326	0.05305	alagoado	0	P.tetradactylus	Lacertoid	sand layer	39
shaded	no sand	50.2656	0	0	0	alagoado	0	P.tetradactylus	Lacertoid	sand layer	40
exposed	no sand	62.832	0	0	0	alagoado	0	P.tetradactylus	Lacertoid	sand layer	41
exposed	no sand	75.3984	0	0	0	alagoado	0	P.tetradactylus	Lacertoid	sand layer	42
shaded	no sand	94.248	0.01061	0	0.01061	alagoado	0	P.tetradactylus	Lacertoid	sand layer	43
shaded	sand	131.947	0	0	0	alagoado	0	P.tetradactylus	Lacertoid	sand layer	44
exposed	sand	62.832	0	0	0	alagoado	0	P.tetradactylus	Lacertoid	sand layer	45
exposed	sand	94.248	0	0	0	alagoado	0	P.tetradactylus	Lacertoid	sand layer	46
shaded	sand	94.248	0	0	0	alagoado	0	P.tetradactylus	Lacertoid	no sand	47
shaded	sand	109.956	0.00909	0	0.00909	alagoado	0	P.tetradactylus	Lacertoid	no sand	48
shaded	sand	50.2656	0	0	0	alagoado	0	P.tetradactylus	Lacertoid	no sand	49
shaded	sand	47.124	0	0	0	alagoado	0	P.tetradactylus	Lacertoid	no sand	50
exposed	sand	78.54	0	0	0	alagoado	0	P.tetradactylus	Lacertoid	no sand	51
exposed	sand	56.5488	0	0	0	alagoado	0	P.tetradactylus	Lacertoid	no sand	52
shaded	sand	78.54	0.02546	0.02546	0.05093	alagoado	0	P.tetradactylus	Lacertoid	no sand	53
shaded	sand	201.062	0.00497	0.00995	0.01492	alagoado	0	P.tetradactylus	Lacertoid	no sand	54
exposed	sand	94.248	0	0	0	alagoado	0	P.tetradactylus	Lacertoid	no sand	55
exposed	sand	245.045	0	0	0	alagoado	0	P.tetradactylus	Lacertoid	no sand	56
shaded	sand	62.832	0.04775	0.03183	0.07958	alagoado	2	P.tetradactylus	Lacertoid	sand layer	57
shaded	sand	197.921	0.06063	0.02526	0.08589	alagoado	5	P.tetradactylus	Lacertoid	sand layer	58
exposed	sand	94.248	0	0	0	alagoado	0	P.tetradactylus	Lacertoid	sand layer	59
shaded	sand	50.2656	0.03979	0.05968	0.09947	alagoado	3	P.tetradactylus	Lacertoid	sand layer	60
exposed	sand	56.5488	0	0	0	alagoado	0	P.tetradactylus	Lacertoid	sand layer	61
shaded	sand	251.328	0.01989	0.00398	0.02387	alagoado	1	P.tetradactylus	Lacertoid	sand layer	62
shaded	sand	131.947	0.06821	0.00758	0.07579	alagoado	1	P.tetradactylus	Lacertoid	sand layer	63
exposed	sand	109.956	0.00909	0	0.00909	alagoado	0	P.tetradactylus	Lacertoid	sand layer	64
exposed	sand	87.9648	0	0	0	alagoado	0	P.tetradactylus	Lacertoid	sand layer	65
shaded	sand	50.2656	0.01989	0.03979	0.05968	alagoado	2	P.tetradactylus	Lacertoid	sand layer	66
shaded	sand	75.3984	0.06631	0.01326	0.07958	alagoado	1	P.tetradactylus	Lacertoid	sand layer	67
shaded	sand	50.2656	0.13926	0.03979	0.17905	alagoado	2	P.tetradactylus	Lacertoid	sand layer	68
exposed	sand	37.6992	0	0	0	alagoado	0	P.tetradactylus	Lacertoid	sand layer	69
exposed	sand	37.6992	0	0	0	alagoado	0	P.tetradactylus	Lacertoid	sand layer	70
exposed	sand	56.5488	0	0	0	alagoado	0	P.tetradactylus	Lacertoid	sand layer	71
shaded	sand	201.062	0.00995	0	0.00995	alagoado	0	P.tetradactylus	Lacertoid	no sand	72
shaded	sand	62.832	0	0	0	alagoado	0	P.tetradactylus	Lacertoid	no sand	73
shaded	sand	87.9648	0	0	0	alagoado	0	P.tetradactylus	Lacertoid	no sand	74
shaded	sand	87.9648	0	0	0	alagoado	0	P.tetradactylus	Lacertoid	no sand	75
shaded	sand	50.2656	0.01989	0.01989	0.03979	alagoado	0	P.tetradactylus	Lacertoid	sand	76
shaded	no sand	28.2744	0.03537	0.1061	0.14147	alagoado	0	P.tetradactylus	Lacertoid	sand	77
shaded	no sand	47.124	0.02122	0.02122	0.04244	alagoado	0	P.tetradactylus	Lacertoid	sand	78
shaded	no sand	78.54	0	0	0	alagoado	0	P.tetradactylus	Lacertoid	no sand	79
shaded	no sand	10.0531	0	0	0	catimbau	0	P.tetradactylus	Lacertoid	sand	80
exposed	no sand	65.6594	0	0	0	catimbau	0	P.tetradactylus	Lacertoid	sand	81
exposed	sand	34.212	0	0	0	catimbau	0	P.tetradactylus	Lacertoid	sand	82
exposed	sand	32.0443	0	0	0	catimbau	0	P.tetradactylus	Lacertoid	sand	83
exposed	sand	22.054	0	0	0	catimbau	0	P.tetradactylus	Lacertoid	sand	84
exposed	sand	91.6091	0	0	0	catimbau	0	P.tetradactylus	Lacertoid	sand	85
shaded	sand	20.4204	0	0	0	catimbau	0	P.tetradactylus	Lacertoid	sand	86
shaded	sand	7.75975	0.12887	0	0.12887	catimbau	0	P.tetradactylus	Lacertoid	sand	87
shaded	sand	32.2014	0	0.03105	0.03105	catimbau	0	P.tetradactylus	Lacertoid	sand	88
shaded	sand	164.934	0.00606	0	0.00606	catimbau	0	P.tetradactylus	Lacertoid	sand	89
exposed	sand	153.153	0	0	0	catimbau	0	P.tetradactylus	Lacertoid	sand	90
exposed	sand	47.501	0	0	0	catimbau	0	P.tetradactylus	Lacertoid	sand	91
shaded	sand	55.7634	0.01793	0.03587	0.0538	catimbau	0	P.tetradactylus	Lacertoid	sand	92
exposed	sand	24.1275	0	0	0	catimbau	0	P.tetradactylus	Lacertoid	sand	93
shaded	sand	73.2307	0	0.02731	0.02731	catimbau	0	P.tetradactylus	Lacertoid	sand	94
exposed	sand	118.187	0	0	0	catimbau	0	P.tetradactylus	Lacertoid	sand	95
exposed	sand	42.5058	0	0	0	catimbau	0	P.tetradactylus	Lacertoid	sand	96
exposed	sand	98.0179	0	0	0	catimbau	0	P.tetradactylus	Lacertoid	sand	97
shaded	sand	77.519	0.0129	0.0387	0.0516	catimbau	0	P.tetradactylus	Lacertoid	sand	98
shaded	sand	38.4846	0.02598	0.02598	0.05197	catimbau	0	P.tetradactylus	Lacertoid	sand	99
shaded	sand	137.366	0	0.00728	0.00728	catimbau	0	P.tetradactylus	Lacertoid	sand	100
exposed	sand	113.098	0	0	0	catimbau	0	P.tetradactylus	Lacertoid	sand	101
exposed	sand	72.0683	0	0	0	catimbau	0	P.tetradactylus	Lacertoid	sand	102
exposed	sand	81.8073	0	0	0	catimbau	0	P.tetradactylus	Lacertoid	sand	103
shaded	sand	68.0471	0	0	0	catimbau	0	P.tetradactylus	Lacertoid	sand	104
exposed	sand	7.0686	0	0	0	catimbau	0	P.tetradactylus	Lacertoid	sand	105
shaded	sand	135.717	0	0.00737	0.00737	catimbau	0	P.tetradactylus	Lacertoid	sand	106
shaded	no sand	10.6814	0.09362	0	0.09362	catimbau	0	P.tetradactylus	Lacertoid	sand	107
exposed	no sand	40.7151	0	0	0	catimbau	0	P.tetradactylus	Lacertoid	sand	108
exposed	no sand	95.5046	0	0	0	catimbau	0	P.tetradactylus	Lacertoid	sand	109
exposed	no sand	11.781	0	0	0	catimbau	0	P.tetradactylus	Lacertoid	sand	110
shaded	no sand	15.8965	0	0	0	catimbau	0	P.tetradactylus	Lacertoid	sand	111
exposed	no sand	18.7868	0	0	0	catimbau	0	P.tetradactylus	Lacertoid	sand	112
exposed	no sand	26.9549	0	0	0	catimbau	0	P.tetradactylus	Lacertoid	sand	113
exposed	no sand	12.0637	0	0	0	catimbau	0	P.tetradactylus	Lacertoid	sand	114
shaded	no sand	93.117	0	0.02148	0.02148	catimbau	0	P.tetradactylus	Lacertoid	sand	115
exposed	no sand	12.4407	0	0	0	catimbau	0	P.tetradactylus	Lacertoid	sand	116
exposed	no sand	82.3728	0	0	0	catimbau	0	P.tetradactylus	Lacertoid	sand	117
shaded	no sand	9.6133	0	0.10402	0.10402	catimbau	0	P.tetradactylus	Lacertoid	sand	118
shaded	no sand	25.1328	0	0	0	catimbau	0	P.tetradactylus	Lacertoid	sand	119
shaded	no sand	23.562	0	0.04244	0.04244	catimbau	0	P.tetradactylus	Lacertoid	sand	120
shaded	sand	30.1594	0	0	0	catimbau	0	P.tetradactylus	Lacertoid	sand	121
exposed	sand	42.7258	0	0	0	catimbau	0	P.tetradactylus	Lacertoid	sand	122
exposed	sand	58.1196	0	0	0	catimbau	0	P.tetradactylus	Lacertoid	sand	123
exposed	no sand	32.0443	0	0	0	catimbau	0	P.tetradactylus	Lacertoid	sand	124
exposed	sand	80.582	0	0	0	catimbau	0	P.tetradactylus	Lacertoid	sand	125
shaded	sand	9.89604	0.10105	0	0.10105	catimbau	0	P.tetradactylus	Lacertoid	sand	126
shaded	sand	6.78586	0.14737	0	0.14737	catimbau	0	P.tetradactylus	Lacertoid	sand	127
shaded	sand	38.6998	0.05168	0.05168	0.10336	catimbau	0	P.tetradactylus	Lacertoid	sand	128
exposed	sand	67.7329	0	0	0	catimbau	0	P.tetradactylus	Lacertoid	sand	129
exposed	sand	34.5576	0	0	0	catimbau	0	P.tetradactylus	Lacertoid	sand	130
exposed	sand	15.708	0	0	0	catimbau	0	P.tetradactylus	Lacertoid	sand	131
exposed	sand	27.0492	0	0	0	catimbau	0	P.tetradactylus	Lacertoid	sand	132
shaded	sand	75.3984	0	0.02653	0.02653	catimbau	0	P.tetradactylus	Lacertoid	sand	133
shaded	sand	92.4887	0	0	0	catimbau	0	P.tetradactylus	Lacertoid	sand	134
shaded	sand	12.7235	0.23578	0	0.23578	catimbau	0	P.tetradactylus	Lacertoid	sand	135
shaded	sand	19.7921	0.10105	0.05053	0.15158	catimbau	0	P.tetradactylus	Lacertoid	sand	136
exposed	sand	25.1328	0	0	0	catimbau	0	P.tetradactylus	Lacertoid	sand	137
exposed	sand	45.082	0	0	0	catimbau	0	P.tetradactylus	Lacertoid	sand	138
exposed	sand	34.0864	0	0	0	catimbau	0	P.tetradactylus	Lacertoid	sand	139
exposed	sand	16.9646	0	0	0	catimbau	0	P.tetradactylus	Lacertoid	sand	140
exposed	sand	17.8129	0	0	0	catimbau	0	P.tetradactylus	Lacertoid	sand	141
exposed	sand	8.16816	0	0	0	catimbau	0	P.tetradactylus	Lacertoid	sand	142
exposed	sand	16.0222	0	0	0	catimbau	0	P.tetradactylus	Lacertoid	sand	143
shaded	sand	22.8708	0	0.04372	0.04372	catimbau	0	P.tetradactylus	Lacertoid	sand	144
shaded	sand	47.6895	0	0	0	catimbau	0	P.tetradactylus	Lacertoid	sand	145
exposed	sand	17.97	0	0	0	catimbau	0	P.tetradactylus	Lacertoid	sand	146
exposed	sand	7.2571	0	0	0	catimbau	0	P.tetradactylus	Lacertoid	sand	147
exposed	sand	15.8337	0	0	0	catimbau	0	P.tetradactylus	Lacertoid	sand	148
shaded	sand	113.098	0	0.02653	0.02653	catimbau	0	P.tetradactylus	Lacertoid	sand	149
shaded	sand	19.635	0.10186	0	0.10186	catimbau	0	P.tetradactylus	Lacertoid	sand	150
shaded	sand	21.2372	0.04709	0	0.04709	catimbau	0	P.tetradactylus	Lacertoid	sand	151
exposed	sand	6.40886	0	0	0	catimbau	0	P.tetradactylus	Lacertoid	sand	152
exposed	sand	17.1531	0	0	0	catimbau	0	P.tetradactylus	Lacertoid	sand	153
exposed	sand	28.2744	0	0	0	catimbau	0	P.tetradactylus	Lacertoid	sand	154
exposed	sand	16.1164	0	0	0	catimbau	0	P.tetradactylus	Lacertoid	sand	155
exposed	sand	23.562	0	0	0	catimbau	0	P.tetradactylus	Lacertoid	sand	156
shaded	sand	56.0776	0.03566	0.01783	0.0535	catimbau	0	P.tetradactylus	Lacertoid	sand	157
shaded	sand	33.7094	0.05933	0	0.05933	catimbau	0	P.tetradactylus	Lacertoid	sand	158
exposed	sand	15.2053	0	0	0	catimbau	0	P.tetradactylus	Lacertoid	sand	159
exposed	sand	16.4934	0	0	0	catimbau	0	P.tetradactylus	Lacertoid	sand	160
exposed	sand	38.3589	0	0	0	catimbau	0	P.tetradactylus	Lacertoid	sand	161
exposed	sand	19.7921	0	0	0	catimbau	0	P.tetradactylus	Lacertoid	sand	162
exposed	sand	4.5239	0	0	0	catimbau	0	P.tetradactylus	Lacertoid	sand	163
shaded	sand	58.0568	0.03445	0.0689	0.10335	catimbau	0	P.tetradactylus	Lacertoid	sand	164
shaded	sand	103.673	0.01929	0	0.01929	catimbau	0	P.tetradactylus	Lacertoid	sand	165
exposed	sand	13.1947	0	0	0	catimbau	0	P.tetradactylus	Lacertoid	sand	166
exposed	sand	42.7258	0	0	0	catimbau	0	P.tetradactylus	Lacertoid	sand	167
exposed	sand	7.0686	0	0	0	catimbau	0	P.tetradactylus	Lacertoid	sand	168
shaded	sand	10.5558	0	0.09473	0.09473	catimbau	0	P.tetradactylus	Lacertoid	sand	169
shaded	sand	18.7868	0.05323	0	0.05323	catimbau	0	P.tetradactylus	Lacertoid	sand	170
shaded	sand	30.0651	0.03326	0.03326	0.06652	catimbau	0	P.tetradactylus	Lacertoid	sand	171
shaded	sand	88.3418	0.02264	0	0.02264	catimbau	0	P.tetradactylus	Lacertoid	sand	172
exposed	sand	11.3098	0	0	0	catimbau	0	P.tetradactylus	Lacertoid	sand	173
shaded	sand	15.2682	0.13099	0.0655	0.19649	catimbau	0	P.tetradactylus	Lacertoid	sand	174
exposed	sand	6.03187	0	0	0	catimbau	0	P.tetradactylus	Lacertoid	sand	175
exposed	sand	34.7775	0	0	0	catimbau	0	P.tetradactylus	Lacertoid	sand	176
exposed	sand	11.8752	0	0	0	catimbau	0	P.tetradactylus	Lacertoid	sand	177
shaded	sand	23.7505	0	0.08421	0.08421	catimbau	0	P.tetradactylus	Lacertoid	sand	178
exposed	sand	15.8337	0	0	0	catimbau	0	P.tetradactylus	Lacertoid	sand	179
exposed	sand	2.82744	0	0	0	catimbau	0	P.tetradactylus	Lacertoid	sand	180
shaded	sand	18.7868	0.05323	0.05323	0.10646	catimbau	0	P.tetradactylus	Lacertoid	sand	181
exposed	sand	11.3098	0	0	0	catimbau	0	P.tetradactylus	Lacertoid	sand	182
shaded	sand	6.44895	0	0.15506	0.15506	Gameleira	0	P.tetradactylus	Lacertoid	no sand	183
shaded	sand	3.55424	0	0	0	Gameleira	0	P.tetradactylus	Lacertoid	no sand	184
shaded	sand	3.84354	0	0	0	Gameleira	0	P.tetradactylus	Lacertoid	no sand	185
shaded	sand	7.22342	0	0.13844	0.13844	Gameleira	0	P.tetradactylus	Lacertoid	no sand	186
exposed	sand	8.3436	0	0	0	Gameleira	0	P.tetradactylus	Lacertoid	no sand	187
exposed	sand	2.25345	0	0	0	Gameleira	0	P.tetradactylus	Lacertoid	no sand	188
exposed	sand	2.7543	0	0	0	Gameleira	0	P.tetradactylus	Lacertoid	no sand	189
exposed	sand	95.8188	0	0	0	Gameleira	0	P.tetradactylus	Lacertoid	no sand	190
shaded	sand	197.921	0	0	0	Gameleira	0	P.tetradactylus	Lacertoid	no sand	191
exposed	sand	169.646	0	0	0	Gameleira	0	P.tetradactylus	Lacertoid	no sand	192
exposed	sand	226.195	0	0	0	Gameleira	0	P.tetradactylus	Lacertoid	no sand	193
exposed	sand	197.921	0	0	0	Gameleira	0	P.tetradactylus	Lacertoid	no sand	194
shaded	sand	117.339	0	0.01704	0.01704	Gameleira	0	P.tetradactylus	Lacertoid	no sand	195
shaded	sand	173.165	0	0	0	Gameleira	0	P.tetradactylus	Lacertoid	no sand	196
shaded	sand	268.607	0	0	0	Gameleira	0	P.tetradactylus	Lacertoid	no sand	197
shaded	sand	226.195	0	0.00442	0.00442	Gameleira	0	P.tetradactylus	Lacertoid	no sand	198
shaded	sand	50.2656	0	0	0	Gameleira	0	P.tetradactylus	Lacertoid	no sand	199
shaded	sand	113.098	0	0.01768	0.01768	Gameleira	0	P.tetradactylus	Lacertoid	no sand	200
shaded	sand	107.348	0	0.00932	0.00932	Gameleira	0	P.tetradactylus	Lacertoid	no sand	201
shaded	sand	120.763	0	0.01656	0.01656	Gameleira	0	P.tetradactylus	Lacertoid	no sand	202
exposed	sand	178.883	0	0	0	Gameleira	0	P.tetradactylus	Lacertoid	no sand	203
exposed	sand	133.832	0	0	0	Gameleira	0	P.tetradactylus	Lacertoid	no sand	204
exposed	sand	227.515	0	0	0	Gameleira	0	P.tetradactylus	Lacertoid	no sand	205
exposed	sand	178.443	0	0	0	Gameleira	0	P.tetradactylus	Lacertoid	no sand	206
exposed	sand	408.816	0	0	0	Gameleira	0	P.tetradactylus	Lacertoid	no sand	207
exposed	sand	100.94	0	0	0	Gameleira	0	P.tetradactylus	Lacertoid	no sand	208
shaded	sand	128.397	0	0	0	Gameleira	0	P.tetradactylus	Lacertoid	no sand	209
shaded	sand	158.337	0	0	0	Gameleira	0	P.tetradactylus	Lacertoid	no sand	210
shaded	sand	100.28	0	0	0	Gameleira	0	P.tetradactylus	Lacertoid	no sand	211
shaded	sand	197.858	0	0	0	Gameleira	0	P.tetradactylus	Lacertoid	no sand	212
shaded	sand	78.3515	0	0	0	Gameleira	0	P.tetradactylus	Lacertoid	no sand	213
exposed	sand	125.79	0	0	0	Gameleira	0	P.tetradactylus	Lacertoid	no sand	214
exposed	sand	124.407	0	0	0	Gameleira	0	P.tetradactylus	Lacertoid	no sand	215
exposed	sand	107.348	0	0	0	Gameleira	0	P.tetradactylus	Lacertoid	no sand	216
shaded	sand	95.8188	0	0	0	Gameleira	0	P.tetradactylus	Lacertoid	no sand	217
shaded	sand	88.2475	0	0	0	Gameleira	0	P.tetradactylus	Lacertoid	no sand	218
exposed	sand	109.265	0	0	0	Gameleira	0	P.tetradactylus	Lacertoid	no sand	219
exposed	sand	109.516	0	0	0	Gameleira	0	P.tetradactylus	Lacertoid	no sand	220
exposed	sand	57.5855	0	0	0	Gameleira	0	P.tetradactylus	Lacertoid	no sand	221
shaded	sand	219.912	0	0.00455	0.00455	Gameleira	0	P.tetradactylus	Lacertoid	no sand	222
shaded	sand	5.54356	0	0	0	Gameleira	0	P.tetradactylus	Lacertoid	no sand	223
shaded	sand	86.7082	0	0	0	Gameleira	0	P.tetradactylus	Lacertoid	no sand	224
exposed	sand	81.4303	0	0	0	Gameleira	0	P.tetradactylus	Lacertoid	no sand	225
exposed	sand	43.9824	0	0	0	Gameleira	0	P.tetradactylus	Lacertoid	no sand	226
shaded	sand	216.77	0	0	0	Gameleira	0	P.tetradactylus	Lacertoid	no sand	227
shaded	no sand	162.107	0	0.01851	0.01851	Gameleira	0	P.tetradactylus	Lacertoid	no sand	228
exposed	no sand	99.5259	0	0	0	pedra vermelha	0	P.tetradactylus	Lacertoid	no sand	229
shaded	no sand	143.163	0	0	0	pedra vermelha	0	P.tetradactylus	Lacertoid	no sand	230
exposed	no sand	4.56	0	0	0	pedra vermelha	0	P.tetradactylus	Lacertoid	no sand	231
shaded	no sand	54.2868	0	0	0	pedra vermelha	0	P.tetradactylus	Lacertoid	no sand	232
exposed	no sand	119.381	0	0	0	pedra vermelha	0	P.tetradactylus	Lacertoid	no sand	233
shaded	no sand	89.1586	0	0.03365	0.03365	pedra vermelha	0	P.tetradactylus	Lacertoid	no sand	234
shaded	no sand	111.087	0	0	0	pedra vermelha	0	P.tetradactylus	Lacertoid	no sand	235
shaded	no sand	73.8276	0	0.01355	0.01355	pedra vermelha	0	P.tetradactylus	Lacertoid	no sand	236
exposed	no sand	80.9276	0	0	0	pedra vermelha	0	P.tetradactylus	Lacertoid	no sand	237
exposed	no sand	118.501	0	0	0	pedra vermelha	0	P.tetradactylus	Lacertoid	no sand	238
shaded	no sand	33.9293	0.35368	0.02947	0.38315	pedra vermelha	0	P.tetradactylus	Lacertoid	sand	239
shaded	no sand	95.002	0.03158	0.02105	0.05263	pedra vermelha	0	P.tetradactylus	Lacertoid	sand	240
shaded	no sand	151.739	0	0	0	pedra vermelha	0	P.tetradactylus	Lacertoid	sand	241
exposed	no sand	20.8288	0.04801	0	0.04801	pedra vermelha	0	P.tetradactylus	Lacertoid	sand	242
shaded	no sand	27.3319	0.03659	0	0.03659	pedra vermelha	0	P.tetradactylus	Lacertoid	sand	243
shaded	no sand	19.635	0.05093	0	0.05093	pedra vermelha	0	P.tetradactylus	Lacertoid	sand	244
exposed	no sand	15.708	0	0	0	pedra vermelha	0	P.tetradactylus	Lacertoid	sand	245
shaded	no sand	6.2832	0	0	0	pedra vermelha	0	P.tetradactylus	Lacertoid	sand	246
shaded	no sand	8.01108	0	0	0	pedra vermelha	0	P.tetradactylus	Lacertoid	sand	247
exposed	no sand	14.1372	0	0	0	pedra vermelha	0	P.tetradactylus	Lacertoid	sand	248
shaded	no sand	37.6992	0	0	0	pedra vermelha	0	P.tetradactylus	Lacertoid	sand	249
exposed	no sand	12.5664	0	0	0	pedra vermelha	0	P.tetradactylus	Lacertoid	sand	250
shaded	no sand	62.832	0	0	0	pedra vermelha	0	P.tetradactylus	Lacertoid	sand	251
exposed	no sand	14.5142	0	0	0	pedra vermelha	0	P.tetradactylus	Lacertoid	sand	252
shaded	no sand	7.0686	0	0	0	pedra vermelha	0	P.tetradactylus	Lacertoid	sand	253
shaded	no sand	34.5576	0	0	0	pedra vermelha	0	P.tetradactylus	Lacertoid	sand	254
shaded	no sand	7.0686	0.14147	0	0.14147	pedra vermelha	0	P.tetradactylus	Lacertoid	sand	255
shaded	no sand	25.6355	0	0	0	pedra vermelha	0	P.tetradactylus	Lacertoid	sand	256
exposed	no sand	21.677	0	0	0	pedra vermelha	0	P.tetradactylus	Lacertoid	sand	257
shaded	no sand	17.3416	0	0	0	pedra vermelha	0	P.tetradactylus	Lacertoid	sand	258
exposed	no sand	18.0956	0	0	0	pedra vermelha	0	P.tetradactylus	Lacertoid	sand	259
shaded	no sand	86.7082	0.02307	0	0.02307	pedra vermelha	0	P.tetradactylus	Lacertoid	sand	260
shaded	no sand	46.6528	0.0643	0.02143	0.08574	pedra vermelha	0	P.tetradactylus	Lacertoid	sand	261
shaded	no sand	34.8718	0.02868	0.02868	0.05735	vacaria	0	P.tetradactylus	Lacertoid	sand	262
shaded	no sand	48.0665	0.0208	0	0.0208	vacaria	0	P.tetradactylus	Lacertoid	sand	263
exposed	no sand	36.9452	0	0	0	vacaria	0	P.tetradactylus	Lacertoid	sand	264
exposed	no sand	47.2811	0	0	0	vacaria	0	P.tetradactylus	Lacertoid	sand	265
shaded	no sand	47.124	0.04244	0.04244	0.08488	vacaria	0	P.tetradactylus	Lacertoid	sand	266
shaded	no sand	24.1903	0.12402	0.04134	0.16536	vacaria	0	P.tetradactylus	Lacertoid	sand	267
exposed	no sand	31.1018	0	0	0	vacaria	0	P.tetradactylus	Lacertoid	sand	268
exposed	no sand	32.0443	0	0	0	vacaria	0	P.tetradactylus	Lacertoid	sand	269
shaded	no sand	32.9868	0	0	0	vacaria	0	P.tetradactylus	Lacertoid	sand	270
shaded	no sand	49.4802	0	0	0	vacaria	0	P.tetradactylus	Lacertoid	sand	271
shaded	no sand	62.832	0	0.01592	0.01592	vacaria	0	P.tetradactylus	Lacertoid	no sand	272
shaded	no sand	81.0533	0	0	0	vacaria	0	P.tetradactylus	Lacertoid	no sand	273
shaded	no sand	169.646	0	0.01768	0.01768	pedra vermelha	0	P.tetradactylus	Lacertoid	no sand	274
shaded	no sand	203.513	0	0.01965	0.01965	pedra vermelha	0	P.tetradactylus	Lacertoid	no sand	275
shaded	no sand	31.1647	0	0.03209	0.03209	pedra vermelha	0	P.tetradactylus	Lacertoid	no sand	276
shaded	no sand	141.372	0.02122	0	0.02122	alagoado	0	P.erythrocercus	Lacertoid	sand	1
shaded	no sand	169.646	0.00589	0.00589	0.01179	alagoado	0	P.erythrocercus	Lacertoid	sand	2
exposed	no sand	125.664	0	0	0	alagoado	0	P.erythrocercus	Lacertoid	sand	3
shaded	no sand	75.3984	0.03979	0.02653	0.06631	alagoado	0	P.erythrocercus	Lacertoid	sand	4
exposed	no sand	113.098	0	0	0	alagoado	0	P.erythrocercus	Lacertoid	sand	5
exposed	no sand	113.098	0	0	0	alagoado	0	P.erythrocercus	Lacertoid	sand	6
shaded	no sand	282.744	0.01415	0.01061	0.02476	alagoado	0	P.erythrocercus	Lacertoid	sand	7
shaded	sand	175.93	0	0.00568	0.00568	alagoado	0	P.erythrocercus	Lacertoid	sand	8
exposed	sand	94.248	0	0	0	alagoado	0	P.erythrocercus	Lacertoid	sand	9
shaded	sand	376.992	0.00796	0.00531	0.01326	alagoado	0	P.erythrocercus	Lacertoid	sand	10
exposed	sand	125.664	0	0	0	alagoado	0	P.erythrocercus	Lacertoid	sand	11
exposed	sand	122.522	0	0	0	alagoado	0	P.erythrocercus	Lacertoid	sand	12
shaded	sand	138.23	0.0217	0.00723	0.02894	alagoado	0	P.erythrocercus	Lacertoid	sand	13
shaded	sand	113.098	0.04421	0	0.04421	alagoado	0	P.erythrocercus	Lacertoid	sand layer	14
shaded	sand	153.938	0.03898	0	0.03898	alagoado	0	P.erythrocercus	Lacertoid	sand layer	15
shaded	sand	28.2744	0.03537	0	0.03537	alagoado	0	P.erythrocercus	Lacertoid	sand layer	16
exposed	sand	28.2744	0	0	0	alagoado	0	P.erythrocercus	Lacertoid	sand layer	17
exposed	sand	28.2744	0	0	0	alagoado	0	P.erythrocercus	Lacertoid	sand layer	18
exposed	sand	56.5488	0	0	0	alagoado	0	P.erythrocercus	Lacertoid	sand layer	19
shaded	sand	530.93	0.04332	0	0.04332	alagoado	0	P.erythrocercus	Lacertoid	sand layer	20
exposed	sand	207.346	0	0	0	alagoado	0	P.erythrocercus	Lacertoid	sand layer	21
shaded	sand	28.2744	0	0	0	alagoado	0	P.erythrocercus	Lacertoid	sand layer	22
shaded	sand	28.2744	0.03537	0	0.03537	alagoado	0	P.erythrocercus	Lacertoid	sand	23
shaded	sand	12.5664	0	0	0	alagoado	0	P.erythrocercus	Lacertoid	sand	24
exposed	sand	78.54	0	0	0	alagoado	0	P.erythrocercus	Lacertoid	sand	25
shaded	sand	87.9648	0	0.01137	0.01137	alagoado	0	P.erythrocercus	Lacertoid	sand	26
shaded	sand	25.1328	0.03979	0	0.03979	alagoado	0	P.erythrocercus	Lacertoid	sand	27
shaded	sand	37.6992	0	0.07958	0.07958	alagoado	0	P.erythrocercus	Lacertoid	sand	28
exposed	sand	18.8496	0	0	0	alagoado	0	P.erythrocercus	Lacertoid	sand	29
exposed	sand	37.6992	0	0	0	alagoado	0	P.erythrocercus	Lacertoid	sand	30
exposed	sand	78.54	0	0	0	alagoado	0	P.erythrocercus	Lacertoid	sand	31
shaded	sand	31.416	0	0.06366	0.06366	alagoado	0	P.erythrocercus	Lacertoid	sand	32
shaded	sand	28.2744	0.03537	0.07074	0.1061	alagoado	0	P.erythrocercus	Lacertoid	sand	33
exposed	sand	50.2656	0	0	0	alagoado	0	P.erythrocercus	Lacertoid	sand	34
shaded	sand	109.956	0.05457	0.00909	0.06366	alagoado	1	P.erythrocercus	Lacertoid	sand layer	35
shaded	sand	188.496	0	0.01061	0.01061	alagoado	2	P.erythrocercus	Lacertoid	sand layer	36
exposed	sand	226.195	0	0	0	alagoado	0	P.erythrocercus	Lacertoid	sand layer	37
exposed	sand	141.372	0	0	0	alagoado	0	P.erythrocercus	Lacertoid	sand layer	38
exposed	sand	75.3984	0.03979	0.01326	0.05305	alagoado	1	P.erythrocercus	Lacertoid	sand layer	39
shaded	sand	50.2656	0	0	0	alagoado	0	P.erythrocercus	Lacertoid	sand layer	40
exposed	no sand	62.832	0	0	0	alagoado	0	P.erythrocercus	Lacertoid	sand layer	41
exposed	no sand	75.3984	0	0	0	alagoado	0	P.erythrocercus	Lacertoid	sand layer	42
shaded	no sand	94.248	0.01061	0	0.01061	alagoado	0	P.erythrocercus	Lacertoid	sand layer	43
shaded	no sand	131.947	0	0	0	alagoado	0	P.erythrocercus	Lacertoid	sand layer	44
exposed	no sand	62.832	0	0	0	alagoado	0	P.erythrocercus	Lacertoid	sand layer	45
exposed	sand	94.248	0	0	0	alagoado	0	P.erythrocercus	Lacertoid	sand layer	46
shaded	sand	94.248	0	0	0	alagoado	0	P.erythrocercus	Lacertoid	no sand	47
shaded	sand	109.956	0.00909	0	0.00909	alagoado	0	P.erythrocercus	Lacertoid	no sand	48
shaded	sand	50.2656	0	0	0	alagoado	0	P.erythrocercus	Lacertoid	no sand	49
shaded	sand	47.124	0	0	0	alagoado	0	P.erythrocercus	Lacertoid	no sand	50
exposed	sand	78.54	0	0	0	alagoado	0	P.erythrocercus	Lacertoid	no sand	51
exposed	sand	56.5488	0	0	0	alagoado	0	P.erythrocercus	Lacertoid	no sand	52
shaded	sand	78.54	0.02546	0.02546	0.05093	alagoado	2	P.erythrocercus	Lacertoid	no sand	53
shaded	sand	201.062	0.00497	0.00995	0.01492	alagoado	2	P.erythrocercus	Lacertoid	no sand	54
exposed	sand	94.248	0	0	0	alagoado	0	P.erythrocercus	Lacertoid	no sand	55
exposed	sand	245.045	0	0	0	alagoado	0	P.erythrocercus	Lacertoid	no sand	56
shaded	sand	62.832	0.04775	0.03183	0.07958	alagoado	0	P.erythrocercus	Lacertoid	sand layer	57
shaded	sand	197.921	0.06063	0.02526	0.08589	alagoado	0	P.erythrocercus	Lacertoid	sand layer	58
exposed	sand	94.248	0	0	0	alagoado	0	P.erythrocercus	Lacertoid	sand layer	59
shaded	sand	50.2656	0.03979	0.05968	0.09947	alagoado	0	P.erythrocercus	Lacertoid	sand layer	60
exposed	sand	56.5488	0	0	0	alagoado	0	P.erythrocercus	Lacertoid	sand layer	61
shaded	sand	251.328	0.01989	0.00398	0.02387	alagoado	0	P.erythrocercus	Lacertoid	sand layer	62
shaded	sand	131.947	0.06821	0.00758	0.07579	alagoado	0	P.erythrocercus	Lacertoid	sand layer	63
exposed	sand	109.956	0.00909	0	0.00909	alagoado	0	P.erythrocercus	Lacertoid	sand layer	64
exposed	sand	87.9648	0	0	0	alagoado	0	P.erythrocercus	Lacertoid	sand layer	65
shaded	sand	50.2656	0.01989	0.03979	0.05968	alagoado	0	P.erythrocercus	Lacertoid	sand layer	66
shaded	sand	75.3984	0.06631	0.01326	0.07958	alagoado	0	P.erythrocercus	Lacertoid	sand layer	67
shaded	sand	50.2656	0.13926	0.03979	0.17905	alagoado	0	P.erythrocercus	Lacertoid	sand layer	68
exposed	sand	37.6992	0	0	0	alagoado	0	P.erythrocercus	Lacertoid	sand layer	69
exposed	sand	37.6992	0	0	0	alagoado	0	P.erythrocercus	Lacertoid	sand layer	70
exposed	no sand	56.5488	0	0	0	alagoado	0	P.erythrocercus	Lacertoid	sand layer	71
shaded	no sand	201.062	0.00995	0	0.00995	alagoado	0	P.erythrocercus	Lacertoid	no sand	72
shaded	no sand	62.832	0	0	0	alagoado	0	P.erythrocercus	Lacertoid	no sand	73
shaded	no sand	87.9648	0	0	0	alagoado	0	P.erythrocercus	Lacertoid	no sand	74
shaded	no sand	87.9648	0	0	0	alagoado	0	P.erythrocercus	Lacertoid	no sand	75
shaded	no sand	50.2656	0.01989	0.01989	0.03979	alagoado	1	P.erythrocercus	Lacertoid	sand	76
shaded	no sand	28.2744	0.03537	0.1061	0.14147	alagoado	3	P.erythrocercus	Lacertoid	sand	77
shaded	no sand	47.124	0.02122	0.02122	0.04244	alagoado	1	P.erythrocercus	Lacertoid	sand	78
shaded	no sand	78.54	0	0	0	alagoado	0	P.erythrocercus	Lacertoid	no sand	79
shaded	no sand	10.0531	0	0	0	catimbau	0	P.erythrocercus	Lacertoid	sand	80
exposed	no sand	65.6594	0	0	0	catimbau	0	P.erythrocercus	Lacertoid	sand	81
exposed	no sand	34.212	0	0	0	catimbau	0	P.erythrocercus	Lacertoid	sand	82
exposed	no sand	32.0443	0	0	0	catimbau	0	P.erythrocercus	Lacertoid	sand	83
exposed	no sand	22.054	0	0	0	catimbau	0	P.erythrocercus	Lacertoid	sand	84
exposed	sand	91.6091	0	0	0	catimbau	0	P.erythrocercus	Lacertoid	sand	85
shaded	sand	20.4204	0	0	0	catimbau	0	P.erythrocercus	Lacertoid	sand	86
shaded	sand	7.75975	0.12887	0	0.12887	catimbau	0	P.erythrocercus	Lacertoid	sand	87
shaded	no sand	32.2014	0	0.03105	0.03105	catimbau	0	P.erythrocercus	Lacertoid	sand	88
shaded	sand	164.934	0.00606	0	0.00606	catimbau	0	P.erythrocercus	Lacertoid	sand	89
exposed	sand	153.153	0	0	0	catimbau	0	P.erythrocercus	Lacertoid	sand	90
exposed	sand	47.501	0	0	0	catimbau	0	P.erythrocercus	Lacertoid	sand	91
shaded	sand	55.7634	0.01793	0.03587	0.0538	catimbau	0	P.erythrocercus	Lacertoid	sand	92
exposed	sand	24.1275	0	0	0	catimbau	0	P.erythrocercus	Lacertoid	sand	93
shaded	sand	73.2307	0	0.02731	0.02731	catimbau	0	P.erythrocercus	Lacertoid	sand	94
exposed	sand	118.187	0	0	0	catimbau	0	P.erythrocercus	Lacertoid	sand	95
exposed	sand	42.5058	0	0	0	catimbau	0	P.erythrocercus	Lacertoid	sand	96
exposed	sand	98.0179	0	0	0	catimbau	0	P.erythrocercus	Lacertoid	sand	97
shaded	sand	77.519	0.0129	0.0387	0.0516	catimbau	0	P.erythrocercus	Lacertoid	sand	98
shaded	sand	38.4846	0.02598	0.02598	0.05197	catimbau	0	P.erythrocercus	Lacertoid	sand	99
shaded	sand	137.366	0	0.00728	0.00728	catimbau	0	P.erythrocercus	Lacertoid	sand	100
exposed	sand	113.098	0	0	0	catimbau	0	P.erythrocercus	Lacertoid	sand	101
exposed	sand	72.0683	0	0	0	catimbau	0	P.erythrocercus	Lacertoid	sand	102
exposed	sand	81.8073	0	0	0	catimbau	0	P.erythrocercus	Lacertoid	sand	103
shaded	sand	68.0471	0	0	0	catimbau	0	P.erythrocercus	Lacertoid	sand	104
exposed	sand	7.0686	0	0	0	catimbau	0	P.erythrocercus	Lacertoid	sand	105
shaded	sand	135.717	0	0.00737	0.00737	catimbau	0	P.erythrocercus	Lacertoid	sand	106
shaded	sand	10.6814	0.09362	0	0.09362	catimbau	0	P.erythrocercus	Lacertoid	sand	107
exposed	sand	40.7151	0	0	0	catimbau	0	P.erythrocercus	Lacertoid	sand	108
exposed	sand	95.5046	0	0	0	catimbau	0	P.erythrocercus	Lacertoid	sand	109
exposed	sand	11.781	0	0	0	catimbau	0	P.erythrocercus	Lacertoid	sand	110
shaded	sand	15.8965	0	0	0	catimbau	0	P.erythrocercus	Lacertoid	sand	111
exposed	sand	18.7868	0	0	0	catimbau	0	P.erythrocercus	Lacertoid	sand	112
exposed	sand	26.9549	0	0	0	catimbau	0	P.erythrocercus	Lacertoid	sand	113
exposed	sand	12.0637	0	0	0	catimbau	0	P.erythrocercus	Lacertoid	sand	114
shaded	sand	93.117	0	0.02148	0.02148	catimbau	0	P.erythrocercus	Lacertoid	sand	115
exposed	sand	12.4407	0	0	0	catimbau	0	P.erythrocercus	Lacertoid	sand	116
exposed	sand	82.3728	0	0	0	catimbau	0	P.erythrocercus	Lacertoid	sand	117
shaded	sand	9.6133	0	0.10402	0.10402	catimbau	0	P.erythrocercus	Lacertoid	sand	118
shaded	sand	25.1328	0	0	0	catimbau	0	P.erythrocercus	Lacertoid	sand	119
shaded	sand	23.562	0	0.04244	0.04244	catimbau	0	P.erythrocercus	Lacertoid	sand	120
shaded	sand	30.1594	0	0	0	catimbau	0	P.erythrocercus	Lacertoid	sand	121
exposed	sand	42.7258	0	0	0	catimbau	0	P.erythrocercus	Lacertoid	sand	122
exposed	sand	58.1196	0	0	0	catimbau	0	P.erythrocercus	Lacertoid	sand	123
exposed	sand	32.0443	0	0	0	catimbau	0	P.erythrocercus	Lacertoid	sand	124
exposed	sand	80.582	0	0	0	catimbau	0	P.erythrocercus	Lacertoid	sand	125
shaded	sand	9.89604	0.10105	0	0.10105	catimbau	0	P.erythrocercus	Lacertoid	sand	126
shaded	sand	6.78586	0.14737	0	0.14737	catimbau	0	P.erythrocercus	Lacertoid	sand	127
shaded	sand	38.6998	0.05168	0.05168	0.10336	catimbau	0	P.erythrocercus	Lacertoid	sand	128
exposed	sand	67.7329	0	0	0	catimbau	0	P.erythrocercus	Lacertoid	sand	129
exposed	sand	34.5576	0	0	0	catimbau	0	P.erythrocercus	Lacertoid	sand	130
exposed	sand	15.708	0	0	0	catimbau	0	P.erythrocercus	Lacertoid	sand	131
exposed	sand	27.0492	0	0	0	catimbau	0	P.erythrocercus	Lacertoid	sand	132
shaded	sand	75.3984	0	0.02653	0.02653	catimbau	0	P.erythrocercus	Lacertoid	sand	133
shaded	sand	92.4887	0	0	0	catimbau	0	P.erythrocercus	Lacertoid	sand	134
shaded	sand	12.7235	0.23578	0	0.23578	catimbau	0	P.erythrocercus	Lacertoid	sand	135
shaded	sand	19.7921	0.10105	0.05053	0.15158	catimbau	0	P.erythrocercus	Lacertoid	sand	136
exposed	sand	25.1328	0	0	0	catimbau	0	P.erythrocercus	Lacertoid	sand	137
exposed	sand	45.082	0	0	0	catimbau	0	P.erythrocercus	Lacertoid	sand	138
exposed	sand	34.0864	0	0	0	catimbau	0	P.erythrocercus	Lacertoid	sand	139
exposed	sand	16.9646	0	0	0	catimbau	0	P.erythrocercus	Lacertoid	sand	140
exposed	sand	17.8129	0	0	0	catimbau	0	P.erythrocercus	Lacertoid	sand	141
exposed	sand	8.16816	0	0	0	catimbau	0	P.erythrocercus	Lacertoid	sand	142
exposed	sand	16.0222	0	0	0	catimbau	0	P.erythrocercus	Lacertoid	sand	143
shaded	sand	22.8708	0	0.04372	0.04372	catimbau	0	P.erythrocercus	Lacertoid	sand	144
shaded	sand	47.6895	0	0	0	catimbau	0	P.erythrocercus	Lacertoid	sand	145
exposed	sand	17.97	0	0	0	catimbau	0	P.erythrocercus	Lacertoid	sand	146
exposed	sand	7.2571	0	0	0	catimbau	0	P.erythrocercus	Lacertoid	sand	147
exposed	sand	15.8337	0	0	0	catimbau	0	P.erythrocercus	Lacertoid	sand	148
shaded	sand	113.098	0	0.02653	0.02653	catimbau	0	P.erythrocercus	Lacertoid	sand	149
shaded	sand	19.635	0.10186	0	0.10186	catimbau	0	P.erythrocercus	Lacertoid	sand	150
shaded	sand	21.2372	0.04709	0	0.04709	catimbau	0	P.erythrocercus	Lacertoid	sand	151
exposed	sand	6.40886	0	0	0	catimbau	0	P.erythrocercus	Lacertoid	sand	152
exposed	sand	17.1531	0	0	0	catimbau	0	P.erythrocercus	Lacertoid	sand	153
exposed	sand	28.2744	0	0	0	catimbau	0	P.erythrocercus	Lacertoid	sand	154
exposed	sand	16.1164	0	0	0	catimbau	0	P.erythrocercus	Lacertoid	sand	155
exposed	sand	23.562	0	0	0	catimbau	0	P.erythrocercus	Lacertoid	sand	156
shaded	sand	56.0776	0.03566	0.01783	0.0535	catimbau	0	P.erythrocercus	Lacertoid	sand	157
shaded	sand	33.7094	0.05933	0	0.05933	catimbau	0	P.erythrocercus	Lacertoid	sand	158
exposed	sand	15.2053	0	0	0	catimbau	0	P.erythrocercus	Lacertoid	sand	159
exposed	sand	16.4934	0	0	0	catimbau	0	P.erythrocercus	Lacertoid	sand	160
exposed	sand	38.3589	0	0	0	catimbau	0	P.erythrocercus	Lacertoid	sand	161
exposed	sand	19.7921	0	0	0	catimbau	0	P.erythrocercus	Lacertoid	sand	162
exposed	sand	4.5239	0	0	0	catimbau	0	P.erythrocercus	Lacertoid	sand	163
shaded	sand	58.0568	0.03445	0.0689	0.10335	catimbau	0	P.erythrocercus	Lacertoid	sand	164
shaded	sand	103.673	0.01929	0	0.01929	catimbau	0	P.erythrocercus	Lacertoid	sand	165
exposed	sand	13.1947	0	0	0	catimbau	0	P.erythrocercus	Lacertoid	sand	166
exposed	sand	42.7258	0	0	0	catimbau	0	P.erythrocercus	Lacertoid	sand	167
exposed	sand	7.0686	0	0	0	catimbau	0	P.erythrocercus	Lacertoid	sand	168
shaded	sand	10.5558	0	0.09473	0.09473	catimbau	0	P.erythrocercus	Lacertoid	sand	169
shaded	sand	18.7868	0.05323	0	0.05323	catimbau	0	P.erythrocercus	Lacertoid	sand	170
shaded	sand	30.0651	0.03326	0.03326	0.06652	catimbau	0	P.erythrocercus	Lacertoid	sand	171
shaded	sand	88.3418	0.02264	0	0.02264	catimbau	0	P.erythrocercus	Lacertoid	sand	172
exposed	sand	11.3098	0	0	0	catimbau	0	P.erythrocercus	Lacertoid	sand	173
shaded	sand	15.2682	0.13099	0.0655	0.19649	catimbau	0	P.erythrocercus	Lacertoid	sand	174
exposed	sand	6.03187	0	0	0	catimbau	0	P.erythrocercus	Lacertoid	sand	175
exposed	sand	34.7775	0	0	0	catimbau	0	P.erythrocercus	Lacertoid	sand	176
exposed	sand	11.8752	0	0	0	catimbau	0	P.erythrocercus	Lacertoid	sand	177
shaded	sand	23.7505	0	0.08421	0.08421	catimbau	0	P.erythrocercus	Lacertoid	sand	178
exposed	sand	15.8337	0	0	0	catimbau	0	P.erythrocercus	Lacertoid	sand	179
exposed	sand	2.82744	0	0	0	catimbau	0	P.erythrocercus	Lacertoid	sand	180
shaded	sand	18.7868	0.05323	0.05323	0.10646	catimbau	0	P.erythrocercus	Lacertoid	sand	181
exposed	sand	11.3098	0	0	0	catimbau	0	P.erythrocercus	Lacertoid	sand	182
shaded	sand	6.44895	0	0.15506	0.15506	Gameleira	0	P.erythrocercus	Lacertoid	no sand	183
shaded	sand	3.55424	0	0	0	Gameleira	0	P.erythrocercus	Lacertoid	no sand	184
shaded	sand	3.84354	0	0	0	Gameleira	0	P.erythrocercus	Lacertoid	no sand	185
shaded	sand	7.22342	0	0.13844	0.13844	Gameleira	0	P.erythrocercus	Lacertoid	no sand	186
exposed	sand	8.3436	0	0	0	Gameleira	0	P.erythrocercus	Lacertoid	no sand	187
exposed	sand	2.25345	0	0	0	Gameleira	0	P.erythrocercus	Lacertoid	no sand	188
exposed	sand	2.7543	0	0	0	Gameleira	0	P.erythrocercus	Lacertoid	no sand	189
exposed	sand	95.8188	0	0	0	Gameleira	0	P.erythrocercus	Lacertoid	no sand	190
shaded	sand	197.921	0	0	0	Gameleira	0	P.erythrocercus	Lacertoid	no sand	191
exposed	no sand	169.646	0	0	0	Gameleira	0	P.erythrocercus	Lacertoid	no sand	192
exposed	no sand	226.195	0	0	0	Gameleira	0	P.erythrocercus	Lacertoid	no sand	193
exposed	no sand	197.921	0	0	0	Gameleira	0	P.erythrocercus	Lacertoid	no sand	194
shaded	no sand	117.339	0	0.01704	0.01704	Gameleira	0	P.erythrocercus	Lacertoid	no sand	195
shaded	no sand	173.165	0	0	0	Gameleira	0	P.erythrocercus	Lacertoid	no sand	196
shaded	no sand	268.607	0	0	0	Gameleira	0	P.erythrocercus	Lacertoid	no sand	197
shaded	no sand	226.195	0	0.00442	0.00442	Gameleira	0	P.erythrocercus	Lacertoid	no sand	198
shaded	no sand	50.2656	0	0	0	Gameleira	0	P.erythrocercus	Lacertoid	no sand	199
shaded	no sand	113.098	0	0.01768	0.01768	Gameleira	0	P.erythrocercus	Lacertoid	no sand	200
shaded	no sand	107.348	0	0.00932	0.00932	Gameleira	0	P.erythrocercus	Lacertoid	no sand	201
shaded	no sand	120.763	0	0.01656	0.01656	Gameleira	0	P.erythrocercus	Lacertoid	no sand	202
exposed	no sand	178.883	0	0	0	Gameleira	0	P.erythrocercus	Lacertoid	no sand	203
exposed	no sand	133.832	0	0	0	Gameleira	0	P.erythrocercus	Lacertoid	no sand	204
exposed	no sand	227.515	0	0	0	Gameleira	0	P.erythrocercus	Lacertoid	no sand	205
exposed	no sand	178.443	0	0	0	Gameleira	0	P.erythrocercus	Lacertoid	no sand	206
exposed	no sand	408.816	0	0	0	Gameleira	0	P.erythrocercus	Lacertoid	no sand	207
exposed	no sand	100.94	0	0	0	Gameleira	0	P.erythrocercus	Lacertoid	no sand	208
shaded	no sand	128.397	0	0	0	Gameleira	0	P.erythrocercus	Lacertoid	no sand	209
shaded	no sand	158.337	0	0	0	Gameleira	0	P.erythrocercus	Lacertoid	no sand	210
shaded	no sand	100.28	0	0	0	Gameleira	0	P.erythrocercus	Lacertoid	no sand	211
shaded	no sand	197.858	0	0	0	Gameleira	0	P.erythrocercus	Lacertoid	no sand	212
shaded	no sand	78.3515	0	0	0	Gameleira	0	P.erythrocercus	Lacertoid	no sand	213
exposed	no sand	125.79	0	0	0	Gameleira	0	P.erythrocercus	Lacertoid	no sand	214
exposed	no sand	124.407	0	0	0	Gameleira	0	P.erythrocercus	Lacertoid	no sand	215
exposed	no sand	107.348	0	0	0	Gameleira	0	P.erythrocercus	Lacertoid	no sand	216
shaded	no sand	95.8188	0	0	0	Gameleira	0	P.erythrocercus	Lacertoid	no sand	217
shaded	no sand	88.2475	0	0	0	Gameleira	0	P.erythrocercus	Lacertoid	no sand	218
exposed	no sand	109.265	0	0	0	Gameleira	0	P.erythrocercus	Lacertoid	no sand	219
exposed	no sand	109.516	0	0	0	Gameleira	0	P.erythrocercus	Lacertoid	no sand	220
exposed	no sand	57.5855	0	0	0	Gameleira	0	P.erythrocercus	Lacertoid	no sand	221
shaded	no sand	219.912	0	0.00455	0.00455	Gameleira	0	P.erythrocercus	Lacertoid	no sand	222
shaded	no sand	5.54356	0	0	0	Gameleira	0	P.erythrocercus	Lacertoid	no sand	223
shaded	no sand	86.7082	0	0	0	Gameleira	0	P.erythrocercus	Lacertoid	no sand	224
exposed	no sand	81.4303	0	0	0	Gameleira	0	P.erythrocercus	Lacertoid	no sand	225
exposed	no sand	43.9824	0	0	0	Gameleira	0	P.erythrocercus	Lacertoid	no sand	226
shaded	no sand	216.77	0	0	0	Gameleira	0	P.erythrocercus	Lacertoid	no sand	227
shaded	no sand	162.107	0	0.01851	0.01851	Gameleira	0	P.erythrocercus	Lacertoid	no sand	228
exposed	no sand	99.5259	0	0	0	pedra vermelha	0	P.erythrocercus	Lacertoid	no sand	229
shaded	no sand	143.163	0	0	0	pedra vermelha	0	P.erythrocercus	Lacertoid	no sand	230
exposed	no sand	4.56	0	0	0	pedra vermelha	0	P.erythrocercus	Lacertoid	no sand	231
shaded	no sand	54.2868	0	0	0	pedra vermelha	0	P.erythrocercus	Lacertoid	no sand	232
exposed	no sand	119.381	0	0	0	pedra vermelha	0	P.erythrocercus	Lacertoid	no sand	233
shaded	no sand	89.1586	0	0.03365	0.03365	pedra vermelha	0	P.erythrocercus	Lacertoid	no sand	234
shaded	no sand	111.087	0	0	0	pedra vermelha	0	P.erythrocercus	Lacertoid	no sand	235
shaded	no sand	73.8276	0	0.01355	0.01355	pedra vermelha	0	P.erythrocercus	Lacertoid	no sand	236
exposed	no sand	80.9276	0	0	0	pedra vermelha	0	P.erythrocercus	Lacertoid	no sand	237
exposed	no sand	118.501	0	0	0	pedra vermelha	0	P.erythrocercus	Lacertoid	no sand	238
shaded	no sand	33.9293	0.35368	0.02947	0.38315	pedra vermelha	0	P.erythrocercus	Lacertoid	sand	239
shaded	no sand	95.002	0.03158	0.02105	0.05263	pedra vermelha	0	P.erythrocercus	Lacertoid	sand	240
shaded	no sand	151.739	0	0	0	pedra vermelha	0	P.erythrocercus	Lacertoid	sand	241
exposed	no sand	20.8288	0.04801	0	0.04801	pedra vermelha	0	P.erythrocercus	Lacertoid	sand	242
shaded	no sand	27.3319	0.03659	0	0.03659	pedra vermelha	0	P.erythrocercus	Lacertoid	sand	243
shaded	no sand	19.635	0.05093	0	0.05093	pedra vermelha	0	P.erythrocercus	Lacertoid	sand	244
exposed	no sand	15.708	0	0	0	pedra vermelha	0	P.erythrocercus	Lacertoid	sand	245
shaded	no sand	6.2832	0	0	0	pedra vermelha	0	P.erythrocercus	Lacertoid	sand	246
shaded	no sand	8.01108	0	0	0	pedra vermelha	0	P.erythrocercus	Lacertoid	sand	247
exposed	sand	14.1372	0	0	0	pedra vermelha	0	P.erythrocercus	Lacertoid	sand	248
shaded	sand	37.6992	0	0	0	pedra vermelha	0	P.erythrocercus	Lacertoid	sand	249
exposed	sand	12.5664	0	0	0	pedra vermelha	0	P.erythrocercus	Lacertoid	sand	250
shaded	sand	62.832	0	0	0	pedra vermelha	0	P.erythrocercus	Lacertoid	sand	251
exposed	sand	14.5142	0	0	0	pedra vermelha	0	P.erythrocercus	Lacertoid	sand	252
shaded	sand	7.0686	0	0	0	pedra vermelha	0	P.erythrocercus	Lacertoid	sand	253
shaded	sand	34.5576	0	0	0	pedra vermelha	0	P.erythrocercus	Lacertoid	sand	254
shaded	sand	7.0686	0.14147	0	0.14147	pedra vermelha	0	P.erythrocercus	Lacertoid	sand	255
shaded	sand	25.6355	0	0	0	pedra vermelha	0	P.erythrocercus	Lacertoid	sand	256
exposed	sand	21.677	0	0	0	pedra vermelha	0	P.erythrocercus	Lacertoid	sand	257
shaded	sand	17.3416	0	0	0	pedra vermelha	0	P.erythrocercus	Lacertoid	sand	258
exposed	sand	18.0956	0	0	0	pedra vermelha	0	P.erythrocercus	Lacertoid	sand	259
shaded	sand	86.7082	0.02307	0	0.02307	pedra vermelha	0	P.erythrocercus	Lacertoid	sand	260
shaded	sand	46.6528	0.0643	0.02143	0.08574	pedra vermelha	0	P.erythrocercus	Lacertoid	sand	261
shaded	sand	34.8718	0.02868	0.02868	0.05735	vacaria	0	P.erythrocercus	Lacertoid	sand	262
shaded	sand	48.0665	0.0208	0	0.0208	vacaria	0	P.erythrocercus	Lacertoid	sand	263
exposed	sand	36.9452	0	0	0	vacaria	0	P.erythrocercus	Lacertoid	sand	264
exposed	sand	47.2811	0	0	0	vacaria	0	P.erythrocercus	Lacertoid	sand	265
shaded	sand	47.124	0.04244	0.04244	0.08488	vacaria	0	P.erythrocercus	Lacertoid	sand	266
shaded	sand	24.1903	0.12402	0.04134	0.16536	vacaria	0	P.erythrocercus	Lacertoid	sand	267
exposed	sand	31.1018	0	0	0	vacaria	0	P.erythrocercus	Lacertoid	sand	268
exposed	sand	32.0443	0	0	0	vacaria	0	P.erythrocercus	Lacertoid	sand	269
shaded	sand	32.9868	0	0	0	vacaria	0	P.erythrocercus	Lacertoid	sand	270
shaded	sand	49.4802	0	0	0	vacaria	0	P.erythrocercus	Lacertoid	sand	271
shaded	sand	62.832	0	0.01592	0.01592	vacaria	0	P.erythrocercus	Lacertoid	no sand	272
shaded	sand	81.0533	0	0	0	vacaria	0	P.erythrocercus	Lacertoid	no sand	273
shaded	sand	169.646	0	0.01768	0.01768	pedra vermelha	0	P.erythrocercus	Lacertoid	no sand	274
shaded	sand	203.513	0	0.01965	0.01965	pedra vermelha	0	P.erythrocercus	Lacertoid	no sand	275
shaded	sand	31.1647	0	0.03209	0.03209	pedra vermelha	0	P.erythrocercus	Lacertoid	no sand	276
shaded	sand	141.372	0.02122	0	0.02122	alagoado	0	V.rubricauda	Lacertoid	sand	1
shaded	sand	169.646	0.00589	0.00589	0.01179	alagoado	0	V.rubricauda	Lacertoid	sand	2
exposed	sand	125.664	0	0	0	alagoado	0	V.rubricauda	Lacertoid	sand	3
shaded	sand	75.3984	0.03979	0.02653	0.06631	alagoado	0	V.rubricauda	Lacertoid	sand	4
exposed	no sand	113.098	0	0	0	alagoado	0	V.rubricauda	Lacertoid	sand	5
exposed	no sand	113.098	0	0	0	alagoado	0	V.rubricauda	Lacertoid	sand	6
shaded	no sand	282.744	0.01415	0.01061	0.02476	alagoado	0	V.rubricauda	Lacertoid	sand	7
shaded	no sand	175.93	0	0.00568	0.00568	alagoado	0	V.rubricauda	Lacertoid	sand	8
exposed	no sand	94.248	0	0	0	alagoado	0	V.rubricauda	Lacertoid	sand	9
shaded	sand	376.992	0.00796	0.00531	0.01326	alagoado	0	V.rubricauda	Lacertoid	sand	10
exposed	sand	125.664	0	0	0	alagoado	0	V.rubricauda	Lacertoid	sand	11
exposed	sand	122.522	0	0	0	alagoado	0	V.rubricauda	Lacertoid	sand	12
shaded	sand	138.23	0.0217	0.00723	0.02894	alagoado	0	V.rubricauda	Lacertoid	sand	13
shaded	sand	113.098	0.04421	0	0.04421	alagoado	0	V.rubricauda	Lacertoid	sand layer	14
shaded	sand	153.938	0.03898	0	0.03898	alagoado	0	V.rubricauda	Lacertoid	sand layer	15
shaded	sand	28.2744	0.03537	0	0.03537	alagoado	0	V.rubricauda	Lacertoid	sand layer	16
exposed	sand	28.2744	0	0	0	alagoado	0	V.rubricauda	Lacertoid	sand layer	17
exposed	sand	28.2744	0	0	0	alagoado	0	V.rubricauda	Lacertoid	sand layer	18
exposed	sand	56.5488	0	0	0	alagoado	0	V.rubricauda	Lacertoid	sand layer	19
shaded	sand	530.93	0.04332	0	0.04332	alagoado	0	V.rubricauda	Lacertoid	sand layer	20
exposed	sand	207.346	0	0	0	alagoado	0	V.rubricauda	Lacertoid	sand layer	21
shaded	sand	28.2744	0	0	0	alagoado	0	V.rubricauda	Lacertoid	sand layer	22
shaded	sand	28.2744	0.03537	0	0.03537	alagoado	0	V.rubricauda	Lacertoid	sand	23
shaded	sand	12.5664	0	0	0	alagoado	0	V.rubricauda	Lacertoid	sand	24
exposed	sand	78.54	0	0	0	alagoado	0	V.rubricauda	Lacertoid	sand	25
shaded	sand	87.9648	0	0.01137	0.01137	alagoado	0	V.rubricauda	Lacertoid	sand	26
shaded	sand	25.1328	0.03979	0	0.03979	alagoado	0	V.rubricauda	Lacertoid	sand	27
shaded	sand	37.6992	0	0.07958	0.07958	alagoado	0	V.rubricauda	Lacertoid	sand	28
exposed	sand	18.8496	0	0	0	alagoado	0	V.rubricauda	Lacertoid	sand	29
exposed	sand	37.6992	0	0	0	alagoado	0	V.rubricauda	Lacertoid	sand	30
exposed	sand	78.54	0	0	0	alagoado	0	V.rubricauda	Lacertoid	sand	31
shaded	sand	31.416	0	0.06366	0.06366	alagoado	0	V.rubricauda	Lacertoid	sand	32
shaded	sand	28.2744	0.03537	0.07074	0.1061	alagoado	0	V.rubricauda	Lacertoid	sand	33
exposed	sand	50.2656	0	0	0	alagoado	0	V.rubricauda	Lacertoid	sand	34
shaded	no sand	109.956	0.05457	0.00909	0.06366	alagoado	0	V.rubricauda	Lacertoid	sand layer	35
shaded	no sand	188.496	0	0.01061	0.01061	alagoado	0	V.rubricauda	Lacertoid	sand layer	36
exposed	no sand	226.195	0	0	0	alagoado	0	V.rubricauda	Lacertoid	sand layer	37
exposed	no sand	141.372	0	0	0	alagoado	0	V.rubricauda	Lacertoid	sand layer	38
exposed	no sand	75.3984	0.03979	0.01326	0.05305	alagoado	0	V.rubricauda	Lacertoid	sand layer	39
shaded	no sand	50.2656	0	0	0	alagoado	0	V.rubricauda	Lacertoid	sand layer	40
exposed	no sand	62.832	0	0	0	alagoado	0	V.rubricauda	Lacertoid	sand layer	41
exposed	no sand	75.3984	0	0	0	alagoado	0	V.rubricauda	Lacertoid	sand layer	42
shaded	no sand	94.248	0.01061	0	0.01061	alagoado	0	V.rubricauda	Lacertoid	sand layer	43
shaded	no sand	131.947	0	0	0	alagoado	0	V.rubricauda	Lacertoid	sand layer	44
exposed	no sand	62.832	0	0	0	alagoado	0	V.rubricauda	Lacertoid	sand layer	45
exposed	no sand	94.248	0	0	0	alagoado	0	V.rubricauda	Lacertoid	sand layer	46
shaded	no sand	94.248	0	0	0	alagoado	0	V.rubricauda	Lacertoid	no sand	47
shaded	no sand	109.956	0.00909	0	0.00909	alagoado	0	V.rubricauda	Lacertoid	no sand	48
shaded	sand	50.2656	0	0	0	alagoado	0	V.rubricauda	Lacertoid	no sand	49
shaded	sand	47.124	0	0	0	alagoado	0	V.rubricauda	Lacertoid	no sand	50
exposed	sand	78.54	0	0	0	alagoado	0	V.rubricauda	Lacertoid	no sand	51
exposed	no sand	56.5488	0	0	0	alagoado	0	V.rubricauda	Lacertoid	no sand	52
shaded	sand	78.54	0.02546	0.02546	0.05093	alagoado	0	V.rubricauda	Lacertoid	no sand	53
shaded	sand	201.062	0.00497	0.00995	0.01492	alagoado	0	V.rubricauda	Lacertoid	no sand	54
exposed	sand	94.248	0	0	0	alagoado	0	V.rubricauda	Lacertoid	no sand	55
exposed	sand	245.045	0	0	0	alagoado	0	V.rubricauda	Lacertoid	no sand	56
shaded	sand	62.832	0.04775	0.03183	0.07958	alagoado	0	V.rubricauda	Lacertoid	sand layer	57
shaded	sand	197.921	0.06063	0.02526	0.08589	alagoado	0	V.rubricauda	Lacertoid	sand layer	58
exposed	sand	94.248	0	0	0	alagoado	0	V.rubricauda	Lacertoid	sand layer	59
shaded	sand	50.2656	0.03979	0.05968	0.09947	alagoado	0	V.rubricauda	Lacertoid	sand layer	60
exposed	sand	56.5488	0	0	0	alagoado	0	V.rubricauda	Lacertoid	sand layer	61
shaded	sand	251.328	0.01989	0.00398	0.02387	alagoado	0	V.rubricauda	Lacertoid	sand layer	62
shaded	sand	131.947	0.06821	0.00758	0.07579	alagoado	0	V.rubricauda	Lacertoid	sand layer	63
exposed	sand	109.956	0.00909	0	0.00909	alagoado	0	V.rubricauda	Lacertoid	sand layer	64
exposed	sand	87.9648	0	0	0	alagoado	0	V.rubricauda	Lacertoid	sand layer	65
shaded	sand	50.2656	0.01989	0.03979	0.05968	alagoado	0	V.rubricauda	Lacertoid	sand layer	66
shaded	sand	75.3984	0.06631	0.01326	0.07958	alagoado	0	V.rubricauda	Lacertoid	sand layer	67
[truncated: 761 more rows]

## Sheet: ab_gymcom
habitat	soil type	plotsize	C.leiolepis	C.nicterus	C. sinebrachiatus	N.ablephara	S.catimbau	P.tetradactylus	P.erythrocercus	V.rubricauda	M.maximiliani	P.paeminosus	ds.foss	ds.lac	id	site	obs	plot
shaded	sand	141.372	3	0	0	0	0	3	0	0	0	0	0.02122	0	0.02122	alagoado		1
shaded	sand	169.646	1	0	0	0	0	1	0	0	0	0	0.00589	0.00589	0.01179	alagoado		2
exposed	sand	125.664	0	0	0	0	0	0	0	0	0	0	0	0	0	alagoado		3
shaded	sand	75.3984	3	0	0	0	0	2	0	0	0	0	0.03979	0.02653	0.06631	alagoado		4
exposed	sand	113.098	0	0	0	0	0	0	0	0	0	0	0	0	0	alagoado		5
exposed	sand	113.098	0	0	0	0	0	0	0	0	0	0	0	0	0	alagoado		6
shaded	sand	282.744	3	0	0	1	0	3	0	0	0	0	0.01415	0.01061	0.02476	alagoado		7
shaded	sand	175.93	0	0	0	0	0	1	0	0	0	0	0	0.00568	0.00568	alagoado		8
exposed	sand	94.248	0	0	0	0	0	0	0	0	0	0	0	0	0	alagoado		9
shaded	sand	376.992	3	0	0	0	0	2	0	0	0	0	0.00796	0.00531	0.01326	alagoado		10
exposed	sand	125.664	0	0	0	0	0	0	0	0	0	0	0	0	0	alagoado		11
exposed	sand	122.522	0	0	0	0	0	0	0	0	0	0	0	0	0	alagoado		12
shaded	sand	138.23	3	0	0	0	0	1	0	0	0	0	0.0217	0.00723	0.02894	alagoado		13
shaded	sand	113.098	5	0	0	0	0	0	0	0	0	0	0.04421	0	0.04421	alagoado	sand layer	14
shaded	sand	153.938	6	0	0	0	0	0	0	0	0	0	0.03898	0	0.03898	alagoado	sand layer	15
shaded	sand	28.2744	0	0	0	1	0	0	0	0	0	0	0.03537	0	0.03537	alagoado	sand layer	16
exposed	sand	28.2744	0	0	0	0	0	0	0	0	0	0	0	0	0	alagoado	sand layer	17
exposed	sand	28.2744	0	0	0	0	0	0	0	0	0	0	0	0	0	alagoado	sand layer	18
exposed	sand	56.5488	0	0	0	0	0	0	0	0	0	0	0	0	0	alagoado	sand layer	19
shaded	sand	530.93	20	0	0	3	0	0	0	0	0	0	0.04332	0	0.04332	alagoado	sand layer	20
exposed	sand	207.346	0	0	0	0	0	0	0	0	0	0	0	0	0	alagoado	sand layer	21
shaded	sand	28.2744	0	0	0	0	0	0	0	0	0	0	0	0	0	alagoado	sand layer	22
shaded	sand	28.2744	1	0	0	0	0	0	0	0	0	0	0.03537	0	0.03537	alagoado	sand	23
shaded	sand	12.5664	0	0	0	0	0	0	0	0	0	0	0	0	0	alagoado	sand	24
exposed	sand	78.54	0	0	0	0	0	0	0	0	0	0	0	0	0	alagoado	sand	25
shaded	sand	87.9648	0	0	0	0	0	1	0	0	0	0	0	0.01137	0.01137	alagoado	sand	26
shaded	sand	25.1328	1	0	0	0	0	0	0	0	0	0	0.03979	0	0.03979	alagoado	sand	27
shaded	sand	37.6992	0	0	0	0	0	3	0	0	0	0	0	0.07958	0.07958	alagoado	sand	28
exposed	sand	18.8496	0	0	0	0	0	0	0	0	0	0	0	0	0	alagoado	sand	29
exposed	sand	37.6992	0	0	0	0	0	0	0	0	0	0	0	0	0	alagoado	sand	30
exposed	sand	78.54	0	0	0	0	0	0	0	0	0	0	0	0	0	alagoado	sand	31
shaded	sand	31.416	0	0	0	0	0	2	0	0	0	0	0	0.06366	0.06366	alagoado	sand	32
shaded	sand	28.2744	0	0	0	1	0	2	0	0	0	0	0.03537	0.07074	0.1061	alagoado	sand	33
exposed	sand	50.2656	0	0	0	0	0	0	0	0	0	0	0	0	0	alagoado	sand	34
shaded	sand	109.956	4	0	0	2	0	0	1	0	0	0	0.05457	0.00909	0.06366	alagoado	sand layer	35
shaded	sand	188.496	0	0	0	0	0	0	2	0	0	0	0	0.01061	0.01061	alagoado	sand layer	36
exposed	sand	226.195	0	0	0	0	0	0	0	0	0	0	0	0	0	alagoado	sand layer	37
exposed	sand	141.372	0	0	0	0	0	0	0	0	0	0	0	0	0	alagoado	sand layer	38
exposed	sand	75.3984	3	0	0	0	0	0	1	0	0	0	0.03979	0.01326	0.05305	alagoado	sand layer	39
shaded	sand	50.2656	0	0	0	0	0	0	0	0	0	0	0	0	0	alagoado	sand layer	40
exposed	sand	62.832	0	0	0	0	0	0	0	0	0	0	0	0	0	alagoado	sand layer	41
exposed	sand	75.3984	0	0	0	0	0	0	0	0	0	0	0	0	0	alagoado	sand layer	42
shaded	sand	94.248	1	0	0	0	0	0	0	0	0	0	0.01061	0	0.01061	alagoado	sand layer	43
shaded	sand	131.947	0	0	0	0	0	0	0	0	0	0	0	0	0	alagoado	sand layer	44
exposed	sand	62.832	0	0	0	0	0	0	0	0	0	0	0	0	0	alagoado	sand layer	45
exposed	sand	94.248	0	0	0	0	0	0	0	0	0	0	0	0	0	alagoado	sand layer	46
shaded	no sand	94.248	0	0	0	0	0	0	0	0	0	0	0	0	0	alagoado	no sand	47
shaded	no sand	109.956	0	0	0	1	0	0	0	0	0	0	0.00909	0	0.00909	alagoado	no sand	48
shaded	no sand	50.2656	0	0	0	0	0	0	0	0	0	0	0	0	0	alagoado	no sand	49
shaded	no sand	47.124	0	0	0	0	0	0	0	0	0	0	0	0	0	alagoado	no sand	50
exposed	no sand	78.54	0	0	0	0	0	0	0	0	0	0	0	0	0	alagoado	no sand	51
exposed	no sand	56.5488	0	0	0	0	0	0	0	0	0	0	0	0	0	alagoado	no sand	52
shaded	no sand	78.54	0	0	0	2	0	0	2	0	0	0	0.02546	0.02546	0.05093	alagoado	no sand	53
shaded	no sand	201.062	0	0	0	1	0	0	2	0	0	0	0.00497	0.00995	0.01492	alagoado	no sand	54
exposed	no sand	94.248	0	0	0	0	0	0	0	0	0	0	0	0	0	alagoado	no sand	55
exposed	no sand	245.045	0	0	0	0	0	0	0	0	0	0	0	0	0	alagoado	no sand	56
shaded	sand	62.832	3	0	0	0	0	2	0	0	0	0	0.04775	0.03183	0.07958	alagoado	sand layer	57
shaded	sand	197.921	12	0	0	0	0	5	0	0	0	0	0.06063	0.02526	0.08589	alagoado	sand layer	58
exposed	sand	94.248	0	0	0	0	0	0	0	0	0	0	0	0	0	alagoado	sand layer	59
shaded	sand	50.2656	2	0	0	0	0	3	0	0	0	0	0.03979	0.05968	0.09947	alagoado	sand layer	60
exposed	sand	56.5488	0	0	0	0	0	0	0	0	0	0	0	0	0	alagoado	sand layer	61
shaded	sand	251.328	5	0	0	0	0	1	0	0	0	0	0.01989	0.00398	0.02387	alagoado	sand layer	62
shaded	sand	131.947	7	0	0	2	0	1	0	0	0	0	0.06821	0.00758	0.07579	alagoado	sand layer	63
exposed	sand	109.956	0	0	0	1	0	0	0	0	0	0	0.00909	0	0.00909	alagoado	sand layer	64
exposed	sand	87.9648	0	0	0	0	0	0	0	0	0	0	0	0	0	alagoado	sand layer	65
shaded	sand	50.2656	1	0	0	0	0	2	0	0	0	0	0.01989	0.03979	0.05968	alagoado	sand layer	66
shaded	sand	75.3984	5	0	0	0	0	1	0	0	0	0	0.06631	0.01326	0.07958	alagoado	sand layer	67
shaded	sand	50.2656	7	0	0	0	0	2	0	0	0	0	0.13926	0.03979	0.17905	alagoado	sand layer	68
exposed	sand	37.6992	0	0	0	0	0	0	0	0	0	0	0	0	0	alagoado	sand layer	69
exposed	sand	37.6992	0	0	0	0	0	0	0	0	0	0	0	0	0	alagoado	sand layer	70
exposed	sand	56.5488	0	0	0	0	0	0	0	0	0	0	0	0	0	alagoado	sand layer	71
shaded	no sand	201.062	2	0	0	0	0	0	0	0	0	0	0.00995	0	0.00995	alagoado		72
shaded	no sand	62.832	0	0	0	0	0	0	0	0	0	0	0	0	0	alagoado		73
shaded	no sand	87.9648	0	0	0	0	0	0	0	0	0	0	0	0	0	alagoado		74
shaded	no sand	87.9648	0	0	0	0	0	0	0	0	0	0	0	0	0	alagoado		75
shaded	sand	50.2656	1	0	0	0	0	0	1	0	0	0	0.01989	0.01989	0.03979	alagoado		76
shaded	sand	28.2744	1	0	0	0	0	0	3	0	0	0	0.03537	0.1061	0.14147	alagoado		77
shaded	sand	47.124	1	0	0	0	0	0	1	0	0	0	0.02122	0.02122	0.04244	alagoado		78
shaded	no sand	78.54	0	0	0	0	0	0	0	0	0	0	0	0	0	alagoado		79
shaded	sand	10.0531	0	0	0	0	0	0	0	0	0	0	0	0	0	catimbau		80
exposed	sand	65.6594	0	0	0	0	0	0	0	0	0	0	0	0	0	catimbau		81
exposed	sand	34.212	0	0	0	0	0	0	0	0	0	0	0	0	0	catimbau		82
exposed	sand	32.0443	0	0	0	0	0	0	0	0	0	0	0	0	0	catimbau		83
exposed	sand	22.054	0	0	0	0	0	0	0	0	0	0	0	0	0	catimbau		84
exposed	sand	91.6091	0	0	0	0	0	0	0	0	0	0	0	0	0	catimbau		85
shaded	sand	20.4204	0	0	0	0	0	0	0	0	0	0	0	0	0	catimbau		86
shaded	sand	7.75975	0	0	0	0	1	0	0	0	0	0	0.12887	0	0.12887	catimbau		87
shaded	sand	32.2014	0	0	0	0	0	0	0	1	0	0	0	0.03105	0.03105	catimbau		88
shaded	sand	164.934	0	0	0	0	1	0	0	0	0	0	0.00606	0	0.00606	catimbau		89
exposed	sand	153.153	0	0	0	0	0	0	0	0	0	0	0	0	0	catimbau		90
exposed	sand	47.501	0	0	0	0	0	0	0	0	0	0	0	0	0	catimbau		91
shaded	sand	55.7634	0	0	0	0	1	0	0	2	0	0	0.01793	0.03587	0.0538	catimbau		92
exposed	sand	24.1275	0	0	0	0	0	0	0	0	0	0	0	0	0	catimbau		93
shaded	sand	73.2307	0	0	0	0	0	0	0	0	2	0	0	0.02731	0.02731	catimbau		94
exposed	sand	118.187	0	0	0	0	0	0	0	0	0	0	0	0	0	catimbau		95
exposed	sand	42.5058	0	0	0	0	0	0	0	0	0	0	0	0	0	catimbau		96
exposed	sand	98.0179	0	0	0	0	0	0	0	0	0	0	0	0	0	catimbau		97
shaded	sand	77.519	0	0	0	0	1	0	0	2	1	0	0.0129	0.0387	0.0516	catimbau		98
shaded	sand	38.4846	0	0	0	0	1	0	0	0	1	0	0.02598	0.02598	0.05197	catimbau		99
shaded	sand	137.366	0	0	0	0	0	0	0	0	1	0	0	0.00728	0.00728	catimbau		100
exposed	sand	113.098	0	0	0	0	0	0	0	0	0	0	0	0	0	catimbau		101
exposed	sand	72.0683	0	0	0	0	0	0	0	0	0	0	0	0	0	catimbau		102
exposed	sand	81.8073	0	0	0	0	0	0	0	0	0	0	0	0	0	catimbau		103
shaded	sand	68.0471	0	0	0	0	0	0	0	0	0	0	0	0	0	catimbau		104
exposed	sand	7.0686	0	0	0	0	0	0	0	0	0	0	0	0	0	catimbau		105
shaded	sand	135.717	0	0	0	0	0	0	0	0	1	0	0	0.00737	0.00737	catimbau		106
shaded	sand	10.6814	0	0	0	0	1	0	0	0	0	0	0.09362	0	0.09362	catimbau		107
exposed	sand	40.7151	0	0	0	0	0	0	0	0	0	0	0	0	0	catimbau		108
exposed	sand	95.5046	0	0	0	0	0	0	0	0	0	0	0	0	0	catimbau		109
exposed	sand	11.781	0	0	0	0	0	0	0	0	0	0	0	0	0	catimbau		110
shaded	sand	15.8965	0	0	0	0	0	0	0	0	0	0	0	0	0	catimbau		111
exposed	sand	18.7868	0	0	0	0	0	0	0	0	0	0	0	0	0	catimbau		112
exposed	sand	26.9549	0	0	0	0	0	0	0	0	0	0	0	0	0	catimbau		113
exposed	sand	12.0637	0	0	0	0	0	0	0	0	0	0	0	0	0	catimbau		114
shaded	sand	93.117	0	0	0	0	0	0	0	2	0	0	0	0.02148	0.02148	catimbau		115
exposed	sand	12.4407	0	0	0	0	0	0	0	0	0	0	0	0	0	catimbau		116
exposed	sand	82.3728	0	0	0	0	0	0	0	0	0	0	0	0	0	catimbau		117
shaded	sand	9.6133	0	0	0	0	0	0	0	0	1	0	0	0.10402	0.10402	catimbau		118
shaded	sand	25.1328	0	0	0	0	0	0	0	0	0	0	0	0	0	catimbau		119
shaded	sand	23.562	0	0	0	0	0	0	0	1	0	0	0	0.04244	0.04244	catimbau		120
shaded	sand	30.1594	0	0	0	0	0	0	0	0	0	0	0	0	0	catimbau		121
exposed	sand	42.7258	0	0	0	0	0	0	0	0	0	0	0	0	0	catimbau		122
exposed	sand	58.1196	0	0	0	0	0	0	0	0	0	0	0	0	0	catimbau		123
exposed	sand	32.0443	0	0	0	0	0	0	0	0	0	0	0	0	0	catimbau		124
exposed	sand	80.582	0	0	0	0	0	0	0	0	0	0	0	0	0	catimbau		125
shaded	sand	9.89604	0	0	0	0	1	0	0	0	0	0	0.10105	0	0.10105	catimbau		126
shaded	sand	6.78586	0	0	0	0	1	0	0	0	0	0	0.14737	0	0.14737	catimbau		127
shaded	sand	38.6998	0	0	0	0	2	0	0	2	0	0	0.05168	0.05168	0.10336	catimbau		128
exposed	sand	67.7329	0	0	0	0	0	0	0	0	0	0	0	0	0	catimbau		129
exposed	sand	34.5576	0	0	0	0	0	0	0	0	0	0	0	0	0	catimbau		130
exposed	sand	15.708	0	0	0	0	0	0	0	0	0	0	0	0	0	catimbau		131
exposed	sand	27.0492	0	0	0	0	0	0	0	0	0	0	0	0	0	catimbau		132
shaded	sand	75.3984	0	0	0	0	0	0	0	2	0	0	0	0.02653	0.02653	catimbau		133
shaded	sand	92.4887	0	0	0	0	0	0	0	0	0	0	0	0	0	catimbau		134
shaded	sand	12.7235	0	0	0	0	3	0	0	0	0	0	0.23578	0	0.23578	catimbau		135
shaded	sand	19.7921	0	0	0	0	2	0	0	1	0	0	0.10105	0.05053	0.15158	catimbau		136
exposed	sand	25.1328	0	0	0	0	0	0	0	0	0	0	0	0	0	catimbau		137
exposed	sand	45.082	0	0	0	0	0	0	0	0	0	0	0	0	0	catimbau		138
exposed	sand	34.0864	0	0	0	0	0	0	0	0	0	0	0	0	0	catimbau		139
exposed	sand	16.9646	0	0	0	0	0	0	0	0	0	0	0	0	0	catimbau		140
exposed	sand	17.8129	0	0	0	0	0	0	0	0	0	0	0	0	0	catimbau		141
exposed	sand	8.16816	0	0	0	0	0	0	0	0	0	0	0	0	0	catimbau		142
exposed	sand	16.0222	0	0	0	0	0	0	0	0	0	0	0	0	0	catimbau		143
shaded	sand	22.8708	0	0	0	0	0	0	0	1	0	0	0	0.04372	0.04372	catimbau		144
shaded	sand	47.6895	0	0	0	0	0	0	0	0	0	0	0	0	0	catimbau		145
exposed	sand	17.97	0	0	0	0	0	0	0	0	0	0	0	0	0	catimbau		146
exposed	sand	7.2571	0	0	0	0	0	0	0	0	0	0	0	0	0	catimbau		147
exposed	sand	15.8337	0	0	0	0	0	0	0	0	0	0	0	0	0	catimbau		148
shaded	sand	113.098	0	0	0	0	0	0	0	0	3	0	0	0.02653	0.02653	catimbau		149
shaded	sand	19.635	0	0	0	0	2	0	0	0	0	0	0.10186	0	0.10186	catimbau		150
shaded	sand	21.2372	0	0	0	0	1	0	0	0	0	0	0.04709	0	0.04709	catimbau		151
exposed	sand	6.40886	0	0	0	0	0	0	0	0	0	0	0	0	0	catimbau		152
exposed	sand	17.1531	0	0	0	0	0	0	0	0	0	0	0	0	0	catimbau		153
exposed	sand	28.2744	0	0	0	0	0	0	0	0	0	0	0	0	0	catimbau		154
exposed	sand	16.1164	0	0	0	0	0	0	0	0	0	0	0	0	0	catimbau		155
exposed	sand	23.562	0	0	0	0	0	0	0	0	0	0	0	0	0	catimbau		156
shaded	sand	56.0776	0	0	0	0	2	0	0	0	1	0	0.03566	0.01783	0.0535	catimbau		157
shaded	sand	33.7094	0	0	0	0	2	0	0	0	0	0	0.05933	0	0.05933	catimbau		158
exposed	sand	15.2053	0	0	0	0	0	0	0	0	0	0	0	0	0	catimbau		159
exposed	sand	16.4934	0	0	0	0	0	0	0	0	0	0	0	0	0	catimbau		160
exposed	sand	38.3589	0	0	0	0	0	0	0	0	0	0	0	0	0	catimbau		161
exposed	sand	19.7921	0	0	0	0	0	0	0	0	0	0	0	0	0	catimbau		162
exposed	sand	4.5239	0	0	0	0	0	0	0	0	0	0	0	0	0	catimbau		163
shaded	sand	58.0568	0	0	0	0	2	0	0	2	2	0	0.03445	0.0689	0.10335	catimbau		164
shaded	sand	103.673	0	0	0	0	2	0	0	0	0	0	0.01929	0	0.01929	catimbau		165
exposed	sand	13.1947	0	0	0	0	0	0	0	0	0	0	0	0	0	catimbau		166
exposed	sand	42.7258	0	0	0	0	0	0	0	0	0	0	0	0	0	catimbau		167
exposed	sand	7.0686	0	0	0	0	0	0	0	0	0	0	0	0	0	catimbau		168
shaded	sand	10.5558	0	0	0	0	0	0	0	0	1	0	0	0.09473	0.09473	catimbau		169
shaded	sand	18.7868	0	0	0	0	1	0	0	0	0	0	0.05323	0	0.05323	catimbau		170
shaded	sand	30.0651	0	0	0	0	1	0	0	0	1	0	0.03326	0.03326	0.06652	catimbau		171
shaded	sand	88.3418	0	0	0	0	2	0	0	0	0	0	0.02264	0	0.02264	catimbau		172
exposed	sand	11.3098	0	0	0	0	0	0	0	0	0	0	0	0	0	catimbau		173
shaded	sand	15.2682	0	0	0	0	2	0	0	1	0	0	0.13099	0.0655	0.19649	catimbau		174
exposed	sand	6.03187	0	0	0	0	0	0	0	0	0	0	0	0	0	catimbau		175
exposed	sand	34.7775	0	0	0	0	0	0	0	0	0	0	0	0	0	catimbau		176
exposed	sand	11.8752	0	0	0	0	0	0	0	0	0	0	0	0	0	catimbau		177
shaded	sand	23.7505	0	0	0	0	0	0	0	1	1	0	0	0.08421	0.08421	catimbau		178
exposed	sand	15.8337	0	0	0	0	0	0	0	0	0	0	0	0	0	catimbau		179
exposed	sand	2.82744	0	0	0	0	0	0	0	0	0	0	0	0	0	catimbau		180
shaded	sand	18.7868	0	0	0	0	1	0	0	0	1	0	0.05323	0.05323	0.10646	catimbau		181
exposed	sand	11.3098	0	0	0	0	0	0	0	0	0	0	0	0	0	catimbau		182
shaded	no sand	6.44895	0	0	0	0	0	0	0	0	0	1	0	0.15506	0.15506	Gameleira		183
shaded	no sand	3.55424	0	0	0	0	0	0	0	0	0	0	0	0	0	Gameleira		184
shaded	no sand	3.84354	0	0	0	0	0	0	0	0	0	0	0	0	0	Gameleira		185
shaded	no sand	7.22342	0	0	0	0	0	0	0	0	0	1	0	0.13844	0.13844	Gameleira		186
exposed	no sand	8.3436	0	0	0	0	0	0	0	0	0	0	0	0	0	Gameleira		187
exposed	no sand	2.25345	0	0	0	0	0	0	0	0	0	0	0	0	0	Gameleira		188
exposed	no sand	2.7543	0	0	0	0	0	0	0	0	0	0	0	0	0	Gameleira		189
exposed	no sand	95.8188	0	0	0	0	0	0	0	0	0	0	0	0	0	Gameleira		190
shaded	no sand	197.921	0	0	0	0	0	0	0	0	0	0	0	0	0	Gameleira		191
exposed	no sand	169.646	0	0	0	0	0	0	0	0	0	0	0	0	0	Gameleira		192
exposed	no sand	226.195	0	0	0	0	0	0	0	0	0	0	0	0	0	Gameleira		193
exposed	no sand	197.921	0	0	0	0	0	0	0	0	0	0	0	0	0	Gameleira		194
shaded	no sand	117.339	0	0	0	0	0	0	0	0	0	2	0	0.01704	0.01704	Gameleira		195
shaded	no sand	173.165	0	0	0	0	0	0	0	0	0	0	0	0	0	Gameleira		196
shaded	no sand	268.607	0	0	0	0	0	0	0	0	0	0	0	0	0	Gameleira		197
shaded	no sand	226.195	0	0	0	0	0	0	0	0	0	1	0	0.00442	0.00442	Gameleira		198
shaded	no sand	50.2656	0	0	0	0	0	0	0	0	0	0	0	0	0	Gameleira		199
shaded	no sand	113.098	0	0	0	0	0	0	0	0	0	2	0	0.01768	0.01768	Gameleira		200
shaded	no sand	107.348	0	0	0	0	0	0	0	0	0	1	0	0.00932	0.00932	Gameleira		201
shaded	no sand	120.763	0	0	0	0	0	0	0	0	0	2	0	0.01656	0.01656	Gameleira		202
exposed	no sand	178.883	0	0	0	0	0	0	0	0	0	0	0	0	0	Gameleira		203
exposed	no sand	133.832	0	0	0	0	0	0	0	0	0	0	0	0	0	Gameleira		204
exposed	no sand	227.515	0	0	0	0	0	0	0	0	0	0	0	0	0	Gameleira		205
exposed	no sand	178.443	0	0	0	0	0	0	0	0	0	0	0	0	0	Gameleira		206
exposed	no sand	408.816	0	0	0	0	0	0	0	0	0	0	0	0	0	Gameleira		207
exposed	no sand	100.94	0	0	0	0	0	0	0	0	0	0	0	0	0	Gameleira		208
shaded	no sand	128.397	0	0	0	0	0	0	0	0	0	0	0	0	0	Gameleira		209
shaded	no sand	158.337	0	0	0	0	0	0	0	0	0	0	0	0	0	Gameleira		210
shaded	no sand	100.28	0	0	0	0	0	0	0	0	0	0	0	0	0	Gameleira		211
shaded	no sand	197.858	0	0	0	0	0	0	0	0	0	0	0	0	0	Gameleira		212
shaded	no sand	78.3515	0	0	0	0	0	0	0	0	0	0	0	0	0	Gameleira		213
exposed	no sand	125.79	0	0	0	0	0	0	0	0	0	0	0	0	0	Gameleira		214
exposed	no sand	124.407	0	0	0	0	0	0	0	0	0	0	0	0	0	Gameleira		215
exposed	no sand	107.348	0	0	0	0	0	0	0	0	0	0	0	0	0	Gameleira		216
shaded	no sand	95.8188	0	0	0	0	0	0	0	0	0	0	0	0	0	Gameleira		217
shaded	no sand	88.2475	0	0	0	0	0	0	0	0	0	0	0	0	0	Gameleira		218
exposed	no sand	109.265	0	0	0	0	0	0	0	0	0	0	0	0	0	Gameleira		219
exposed	no sand	109.516	0	0	0	0	0	0	0	0	0	0	0	0	0	Gameleira		220
exposed	no sand	57.5855	0	0	0	0	0	0	0	0	0	0	0	0	0	Gameleira		221
shaded	no sand	219.912	0	0	0	0	0	0	0	0	0	1	0	0.00455	0.00455	Gameleira		222
shaded	no sand	5.54356	0	0	0	0	0	0	0	0	0	0	0	0	0	Gameleira		223
shaded	no sand	86.7082	0	0	0	0	0	0	0	0	0	0	0	0	0	Gameleira		224
exposed	no sand	81.4303	0	0	0	0	0	0	0	0	0	0	0	0	0	Gameleira		225
exposed	no sand	43.9824	0	0	0	0	0	0	0	0	0	0	0	0	0	Gameleira		226
shaded	no sand	216.77	0	0	0	0	0	0	0	0	0	0	0	0	0	Gameleira		227
shaded	no sand	162.107	0	0	0	0	0	0	0	0	0	3	0	0.01851	0.01851	Gameleira		228
exposed	no sand	99.5259	0	0	0	0	0	0	0	0	0	0	0	0	0	pedra vermelha		229
shaded	no sand	143.163	0	0	0	0	0	0	0	0	0	0	0	0	0	pedra vermelha		230
exposed	no sand	4.56	0	0	0	0	0	0	0	0	0	0	0	0	0	pedra vermelha		231
shaded	no sand	54.2868	0	0	0	0	0	0	0	0	0	0	0	0	0	pedra vermelha		232
exposed	no sand	119.381	0	0	0	0	0	0	0	0	0	0	0	0	0	pedra vermelha		233
shaded	no sand	89.1586	0	0	0	0	0	0	0	0	0	3	0	0.03365	0.03365	pedra vermelha		234
shaded	no sand	111.087	0	0	0	0	0	0	0	0	0	0	0	0	0	pedra vermelha		235
shaded	no sand	73.8276	0	0	0	0	0	0	0	0	0	1	0	0.01355	0.01355	pedra vermelha		236
exposed	no sand	80.9276	0	0	0	0	0	0	0	0	0	0	0	0	0	pedra vermelha		237
exposed	no sand	118.501	0	0	0	0	0	0	0	0	0	0	0	0	0	pedra vermelha		238
shaded	sand	33.9293	0	0	12	0	0	0	0	0	0	1	0.35368	0.02947	0.38315	pedra vermelha		239
shaded	sand	95.002	0	0	3	0	0	0	0	2	0	0	0.03158	0.02105	0.05263	pedra vermelha		240
shaded	sand	151.739	0	0	0	0	0	0	0	0	0	0	0	0	0	pedra vermelha		241
exposed	sand	20.8288	0	0	1	0	0	0	0	0	0	0	0.04801	0	0.04801	pedra vermelha		242
shaded	sand	27.3319	0	0	1	0	0	0	0	0	0	0	0.03659	0	0.03659	pedra vermelha		243
shaded	sand	19.635	0	0	1	0	0	0	0	0	0	0	0.05093	0	0.05093	pedra vermelha		244
exposed	sand	15.708	0	0	0	0	0	0	0	0	0	0	0	0	0	pedra vermelha		245
shaded	sand	6.2832	0	0	0	0	0	0	0	0	0	0	0	0	0	pedra vermelha		246
shaded	sand	8.01108	0	0	0	0	0	0	0	0	0	0	0	0	0	pedra vermelha		247
exposed	sand	14.1372	0	0	0	0	0	0	0	0	0	0	0	0	0	pedra vermelha		248
shaded	sand	37.6992	0	0	0	0	0	0	0	0	0	0	0	0	0	pedra vermelha		249
exposed	sand	12.5664	0	0	0	0	0	0	0	0	0	0	0	0	0	pedra vermelha		250
shaded	sand	62.832	0	0	0	0	0	0	0	0	0	0	0	0	0	pedra vermelha		251
exposed	sand	14.5142	0	0	0	0	0	0	0	0	0	0	0	0	0	pedra vermelha		252
shaded	sand	7.0686	0	0	0	0	0	0	0	0	0	0	0	0	0	pedra vermelha		253
shaded	sand	34.5576	0	0	0	0	0	0	0	0	0	0	0	0	0	pedra vermelha		254
shaded	sand	7.0686	0	0	1	0	0	0	0	0	0	0	0.14147	0	0.14147	pedra vermelha		255
shaded	sand	25.6355	0	0	0	0	0	0	0	0	0	0	0	0	0	pedra vermelha		256
exposed	sand	21.677	0	0	0	0	0	0	0	0	0	0	0	0	0	pedra vermelha		257
shaded	sand	17.3416	0	0	0	0	0	0	0	0	0	0	0	0	0	pedra vermelha		258
exposed	sand	18.0956	0	0	0	0	0	0	0	0	0	0	0	0	0	pedra vermelha		259
shaded	sand	86.7082	0	0	2	0	0	0	0	0	0	0	0.02307	0	0.02307	pedra vermelha		260
shaded	sand	46.6528	0	0	3	0	0	0	0	1	0	0	0.0643	0.02143	0.08574	pedra vermelha		261
shaded	sand	34.8718	0	1	0	0	0	0	0	1	0	0	0.02868	0.02868	0.05735	vacaria		262
shaded	sand	48.0665	0	1	0	0	0	0	0	0	0	0	0.0208	0	0.0208	vacaria		263
exposed	sand	36.9452	0	0	0	0	0	0	0	0	0	0	0	0	0	vacaria		264
exposed	sand	47.2811	0	0	0	0	0	0	0	0	0	0	0	0	0	vacaria		265
shaded	sand	47.124	0	2	0	0	0	0	0	2	0	0	0.04244	0.04244	0.08488	vacaria		266
shaded	sand	24.1903	0	3	0	0	0	0	0	1	0	0	0.12402	0.04134	0.16536	vacaria		267
exposed	sand	31.1018	0	0	0	0	0	0	0	0	0	0	0	0	0	vacaria		268
exposed	sand	32.0443	0	0	0	0	0	0	0	0	0	0	0	0	0	vacaria		269
shaded	sand	32.9868	0	0	0	0	0	0	0	0	0	0	0	0	0	vacaria		270
shaded	sand	49.4802	0	0	0	0	0	0	0	0	0	0	0	0	0	vacaria		271
shaded	no sand	62.832	0	0	0	0	0	0	0	1	0	0	0	0.01592	0.01592	vacaria		272
shaded	no sand	81.0533	0	0	0	0	0	0	0	0	0	0	0	0	0	vacaria		273
shaded	no sand	169.646	0	0	0	0	0	0	0	3	0	0	0	0.01768	0.01768	pedra vermelha		274
shaded	no sand	203.513	0	0	0	0	0	0	0	4	0	0	0	0.01965	0.01965	pedra vermelha		275
shaded	no sand	31.1647	0	0	0	0	0	0	0	1	0	0	0	0.03209	0.03209	pedra vermelha		276

## Sheet: Table s1
Table s1. full results on effects of morph and microhabitat on the escape option of gymnophthalmini lizards
a
model:	option	~	treatment	+	morph
strategies compared:		bury to hide
Random	effects:
	Variance	Std.Dev
1|individual	0.4307	0.6562
Fixed	effects:
	Value	Std.Error	Zscore	Pvalue
(Intercept)	0.28037	0.20343	1.3782	0.1681
SAND	-2.72248	0.35939	-7.5753	3.583e-14	***
BSLM	2.97172	0.426	6.9759	3.038e-12	***
b
strategies compared:		hide to run
Random	effects:
	Variance	Std.Dev
1|individual	1.425	1.194
Fixed	effects:
	Value	Std.Error	Zscore	Pvalue
(Intercept)	-1.3208	0.30194	-4.3744	1.217e-05	***
SAND	0.11951	0.29485	0.4053	0.6852
BSLM	2.28528	0.3627	6.3007	2.964e-10	***
c
strategies compared:		bury to run
Random	effects:
	Variance	Std.Dev
1|individual	0.8789	0.9375
Fixed	effects:
	Value	Std.Error	Zscore	Pvalue
(Intercept)	-1.17775	0.31204	-3.7744	0.0001604	***
SAND	-2.03954	0.44675	-4.5652	4.989e-06	***
BSLM	4.95352	0.46451	10.664	2.2e-16	***
													1

## Sheet: Table s2
Table s2. Full results for effects of morph and substrate on sprint speed.
Model:	topvel~	treatment	*	morph
Random	effects:
	Variance	Std.Dev
1|individual	58.54	7.651
residual	380.72	19.512
Fixed	effects:
	Value	Std.Error	Zscore	Pvalue
(Intercept)	68.2707	1.6195	42.1549	2.2e-16	***
HARD	12.1337	1.8131	6.6921	2.2e-11	***
BSLM	-32.5469	2.2771	-14.2931	2.2e-16	***
HARDXBSLM	-17.1927	2.5074	-6.8568	7.044e-12	***

## Sheet: Table s3
Table s3. Full results for effects of prey speed and morph on hunting performance of gymnophthalmini lizards over crickets in experimental enclosures.
Model:	ingested~	treatment	*	morph
Random	effects:
	Variance	Std.Dev
1|ind	1.574	1.255
residual	1.481	1.217
Fixed	effects:
	Value	Std.Error	Zscore	Pvalue
(Intercept)	2.24224	0.28213	7.9476	1.902e-15	***
INJURED	1.17949	0.27558	4.28	1.869e-05	***
BLSM	0.53327	0.37676	1.4154	0.1569
INJUREDXBLSM	-0.2203	0.36931	-0.5965	0.5508

## Sheet: Table s4
Table s4. Full results for effects of prey location (above and under sand) and morph on hunting performance of gymnophthalmini lizards within experimental enclosures
Model:	ingested~	treatment	*	morph
Random	effects:
	Variance	Std.Dev
1|ind	0.06343	0.2518
residual	1.32273	1.1501
Fixed	effects:
	Value	Std.Error	Zscore	Pvalue
(Intercept)	0.48018	0.17391	2.761	0.005762	**
UP	3.58696	0.23981	14.957	2.2e-16	***
BLSM	4.1744	0.24295	17.182	2.2e-16	***
UPXBSLM	-4.54783	0.33429	-13.604	2.2e-16	***

[truncated: 3 more sheets: Table s5, Table s6, Table s7]
